# Supplementary material
Source: publisher figshare collection journal article supplement (https://rs.figshare.com/ndownloader/files/21382896)
Supplement: Supplementary file 1 [file 21382896]

## Sheet: README
TE-QTL results
Tab	Description	Tab color	Cell type
LCL.eQTL.00.5FDR	all TE-eQTL discovered in LCL @ 5% FDR		LCL
LCL.specific.TE-eQTL.0.05+B	LCL-specific TE-eQTL @ 5% FDR + Boneferonni correction
TOP-SNP.TE-LCL	TE being top eVariant in a conditional analysis with SNP (LCL)
LCL.caQTL.00.5FDR	all TE-caQTL discovered in LCL @ 5% FDR
LCL.e-ca-QTL	TE both e- and ca-QTL in LCL
iPSC.eQTL.00.5FDR	all TE-eQTL discovered in iPSC @ 5% FDR		iPSC
iPSC.specific.TE-eQTL	iPSC-specific TE-eQTL @ 5% FDR + Boneferonni correction
TOP-SNP.TE-iPSC	TE being top eVariant in a conditional analysis with SNP (iPSC)
shared.TE-eQTL.0.05FDR+Bonef.	shared TE-eQTL between LCL and iPSC, 5% FDR + Boneferonni correction		both

## Sheet: LCL.eQTL.0.05FDR
gene	Chr_gene	Start_gene	End_gene	strand	nb_tested	dist_Gene	MEI	Chr_MEI	Pos_MEI	Pos_MEI2	df	dummy	Beta1	Beta2	P_nominal	slope	P_empirical	P_value	Gene_name	mei
ENSG00000003393	2	202565278	202645912	-	3	0	ALU-NREF_396	2	202631460	202631460	442	437.36	1.00001	2.98212	6.0476e-07	0.220237	9.999e-05	2.06535e-06	ALS2	ALU
ENSG00000005381	17	56347218	56358296	-	2	420991	ALU-NREF_2445	17	55926227	55926227	442	440.327	0.999992	1.98205	0.000161663	0.318328	0.00069993	0.000329732	MPO	ALU
ENSG00000011376	3	45429999	45590913	+	3	0	ALU-NREF_485	3	45542662	45542662	442	450.6	0.999996	3.01478	5.46955e-09	0.206108	9.999e-05	1.17323e-08	LARS2	ALU
ENSG00000059691	4	152591657	152682175	-	2	250949	L1-REF_40	4	152340708	152340708	442	450.374	1.00001	2.02727	5.07064e-11	-0.283522	9.999e-05	6.76515e-11	PET112	L1
ENSG00000065413	2	197831742	198175897	-	2	217125	ALU-REF_92	2	197614617	197614617	442	451.593	1.00001	1.96652	0.000228338	-0.11171	0.00019998	0.000383689	ANKRD44	ALU
ENSG00000066032	2	79412358	80875905	+	5	0	ALU-NREF_304	2	80769024	80769024	442	442.852	1.00001	4.89669	3.6562e-06	-0.240138	9.999e-05	1.75192e-05	CTNNA2	ALU
ENSG00000068796	5	61601990	61924409	+	4	0	ALU-NREF_854	5	61857118	61857118	442	454.55	1	3.7549	9.91668e-05	0.125647	0.00049995	0.000296413	KIF2A	ALU
ENSG00000070081	11	17229701	17371521	+	2	-33861	ALU-REF_621	11	17195840	17195840	442	456.449	0.999997	2.01221	8.90189e-10	0.313447	9.999e-05	9.54221e-10	NUCB2	ALU
ENSG00000070718	8	42010465	42029191	+	3	10715	ALU-NREF_1372	8	42039906	42039906	442	451.982	1.00001	2.94491	5.93339e-06	0.255901	0.00019998	1.37142e-05	AP3M2	ALU
ENSG00000071246	14	77228533	77249354	+	4	-112290	ALU-NREF_2255	14	77116243	77116243	442	438.32	1.00001	3.68531	5.94469e-05	0.239484	0.00039996	0.000235153	VASH1	ALU
ENSG00000073803	3	185000730	185216845	+	2	0	ALU-REF_149	3	185017331	185017331	442	438.806	1.00001	1.95395	7.81244e-09	-0.367291	9.999e-05	1.72778e-08	MAP3K13	ALU
ENSG00000079819	6	131160488	131384462	-	7	0	ALU-NREF_1149	6	131273499	131273499	442	449.219	0.978567	6.71515	5.88453e-05	-0.202667	0.00039996	0.000410831	EPB41L2	ALU
ENSG00000080618	13	46627322	46679211	-	3	0	ALU-NREF_2101	13	46647748	46647748	442	449.78	1.00001	3.0343	3.57088e-07	0.318211	9.999e-05	8.55204e-07	CPB2	ALU
ENSG00000084754	2	26413505	26513336	-	2	0	ALU-NREF_247	2	26473946	26473946	442	432.784	0.999992	1.96559	4.28906e-05	-0.272675	9.999e-05	0.000101366	HADHA	ALU
ENSG00000088854	20	3229952	3388272	-	5	0	ALU-NREF_2554	20	3242418	3242418	442	447.417	1	5.00725	1.17592e-08	0.374268	9.999e-05	4.79526e-08	C20orf194	ALU
ENSG00000091428	2	173600003	173917621	+	2	-77832	ALU-NREF_363	2	173522171	173522171	442	437.09	1.00001	1.98242	0.000452045	-0.217743	0.00069993	0.000964061	RAPGEF4	ALU
ENSG00000095739	10	28966272	28971868	+	2	130673	ALU-NREF_1643	10	29102541	29102541	442	483.977	1.00001	1.90855	2.0447e-07	-0.300658	9.999e-05	1.03641e-07	BAMBI	ALU
ENSG00000097046	1	91966409	91991321	+	1	-52312	L1-REF_5	1	91914097	91914097	442	432.094	0.999991	0.989104	0.00100163	0.184858	0.00109989	0.00112978	CDC7	L1
ENSG00000100401	22	41641616	41682255	-	1	-458224	ALU-REF_890	22	42140479	42140479	442	462.568	0.999999	1.0147	0.00146934	-0.142564	0.00109989	0.00115499	RANGAP1	ALU
ENSG00000100505	14	51441981	51562779	-	2	-156221	ALU-NREF_2218	14	51719000	51719000	442	435.115	0.999996	1.95366	1.69732e-08	0.334083	9.999e-05	4.28147e-08	TRIM9	ALU
ENSG00000101353	20	35729630	35870022	-	1	0	ALU-REF_865	20	35815610	35815610	442	417.504	0.999996	0.976515	5.56819e-05	0.262079	0.00029997	8.75563e-05	MROH8	ALU
ENSG00000101638	18	44259082	44339220	-	4	0	ALU-REF_829	18	44338418	44338418	442	445.561	1.00001	3.96342	3.35259e-13	0.421023	9.999e-05	1.06863e-12	ST8SIA5	ALU
ENSG00000103249	16	1494936	1525581	-	1	618308	ALU-REF_783	16	876628	876628	442	440.511	0.999997	1.00485	0.000395688	-0.175717	0.00059994	0.000406729	CLCN7	ALU
ENSG00000103356	16	23533336	23585710	-	3	4800	ALU-REF_785	16	23528536	23528536	442	448.982	0.999998	2.99959	4.789e-11	-0.411912	9.999e-05	1.01276e-10	EARS2	ALU
ENSG00000103365	16	23474864	23533316	-	3	0	ALU-REF_785	16	23528536	23528536	442	439.162	0.999998	2.99977	4.37488e-05	-0.206889	0.00019998	0.000138874	GGA2	ALU
ENSG00000104093	15	51739909	51915030	-	3	0	ALU-REF_773	15	51897702	51897702	442	441.795	1.00001	2.99713	3.07923e-09	0.279555	9.999e-05	9.30535e-09	DMXL2	ALU
ENSG00000104129	15	41060068	41106767	-	3	0	ALU-NREF_2296	15	41100332	41100332	442	440.187	0.999994	2.97567	0.000237972	0.146361	0.00089991	0.00072922	DNAJC17	ALU
ENSG00000104341	8	98787286	98865241	+	2	-3837	ALU-REF_507	8	98783449	98783449	442	446.5	0.999998	1.99705	0.000221694	0.218013	0.0009999	0.000411117	LAPTM4B	ALU
ENSG00000104388	8	61429417	61536186	+	3	0	ALU-NREF_1396	8	61526797	61526797	442	440.36	0.999995	2.95901	1.53259e-10	0.345217	9.999e-05	4.90297e-10	RAB2A	ALU
ENSG00000105205	19	40221891	40228668	-	1	-28877	ALU-REF_849	19	40257545	40257545	442	467.014	0.999991	1.03521	0.000137685	-0.339277	0.00089991	9.21334e-05	CLC	ALU
ENSG00000105793	7	89964538	90839905	+	4	-17709	ALU-NREF_1265	7	89946829	89946829	442	448.615	1.00001	4.03213	0.000207479	-0.329095	0.0009999	0.000749399	GTPBP10	ALU
ENSG00000106384	7	100838289	100844302	-	1	-489894	ALU-REF_440	7	101334196	101334196	442	445.043	1.00001	1.01336	0.00110384	-0.21685	0.0009999	0.00107503	MOGAT3	ALU
ENSG00000106723	9	91003335	91093609	+	1	6120	ALU-NREF_1556	9	91099729	91099729	442	436.033	1.00001	0.991906	0.00109309	0.245296	0.00149985	0.00117211	SPIN1	ALU
ENSG00000107779	10	88516408	88692595	+	4	0	ALU-REF_598	10	88666177	88666177	442	440.608	1.00001	4.00267	1.20803e-06	0.238534	9.999e-05	5.02507e-06	BMPR1A	ALU
ENSG00000108100	10	35535954	35860852	+	7	0	ALU-REF_584	10	35593207	35593207	442	441.633	0.969715	6.56446	0.000104586	0.200949	0.00169983	0.000870206	CCNY	ALU
ENSG00000108592	17	61896794	61909379	-	2	165101	ALU-NREF_2455	17	61731693	61731693	442	443.09	0.99999	1.98937	1.11393e-11	0.338605	9.999e-05	2.09142e-11	FTSJ3	ALU
ENSG00000108604	17	61909445	61920425	-	2	177752	ALU-NREF_2455	17	61731693	61731693	442	447.676	0.999994	2.02114	0.000429495	0.153731	0.00079992	0.000796937	SMARCD2	ALU
ENSG00000111215	12	10977560	11324212	-	4	0	ALU-REF_660	12	11258525	11258525	442	450.514	1.00001	3.85802	2.9596e-49	0.68802	9.999e-05	1.38619e-49	PRR4	ALU
ENSG00000111696	12	104164232	104234975	-	1	-58421	ALU-REF_684	12	104293396	104293396	442	446.252	0.999998	0.996308	7.40755e-07	0.380159	9.999e-05	6.52979e-07	NT5DC3	ALU
ENSG00000111796	12	9747148	9760482	-	3	-110680	ALU-NREF_1906	12	9871162	9871162	442	455.176	0.999989	3.07619	1.9444e-06	-0.298548	9.999e-05	4.20882e-06	KLRB1	ALU
ENSG00000111816	6	116252313	116381921	-	4	0	ALU-NREF_1108	6	116307096	116307096	442	453.255	1	3.75419	0.000144122	0.177279	0.00049995	0.000444934	FRK	ALU
ENSG00000112992	5	43602795	43707507	+	4	-60990	ALU-NREF_826	5	43541805	43541805	442	445.378	1	3.92391	2.2395e-11	-0.349565	9.999e-05	7.3775e-11	NNT	ALU
ENSG00000113790	3	184908413	184999778	-	2	-17553	ALU-REF_149	3	185017331	185017331	442	444.007	1	2.00698	2.78277e-05	-0.27949	0.00019998	5.35503e-05	EHHADH	ALU
ENSG00000115274	2	74682151	74688018	+	3	-170874	ALU-REF_54	2	74511277	74511277	442	454.755	1.00001	2.96636	4.25041e-06	0.193948	9.999e-05	9.1667e-06	INO80B	ALU
ENSG00000115423	2	84743580	85046713	+	4	-153434	ALU-NREF_307	2	84590146	84590146	442	444.342	1	3.89733	2.30522e-05	0.274286	0.00019998	8.54603e-05	DNAH6	ALU
ENSG00000115750	2	9983484	10074545	+	2	-24262	ALU-REF_36	2	9959222	9959222	442	438.752	1	2.05881	2.31682e-15	-0.336508	9.999e-05	6.02949e-15	TAF1B	ALU
ENSG00000115902	2	65215612	65250999	+	4	-51829	ALU-NREF_282	2	65163783	65163783	442	436.475	0.999997	3.95919	3.49336e-09	-0.352888	9.999e-05	1.73089e-08	SLC1A4	ALU
ENSG00000116679	1	185265521	185286461	-	2	-86636	ALU-REF_24	1	185373097	185373097	442	443.036	0.999995	1.98351	6.61145e-06	-0.231196	9.999e-05	1.2792e-05	IVNS1ABP	ALU
ENSG00000116791	1	75171171	75232362	-	5	0	L1-NREF_3	1	75192907	75192907	442	445.593	1.00001	4.8424	7.28999e-17	-0.509386	9.999e-05	2.64775e-16	CRYZ	L1
ENSG00000116815	1	117057158	117113661	-	2	0	ALU-REF_20	1	117078165	117078165	442	452.435	1.00001	2.00925	1.04475e-05	-0.317563	0.00019998	1.65057e-05	CD58	ALU
ENSG00000117481	1	46805850	46830824	+	2	-598563	ALU-REF_7	1	46207287	46207287	442	437.889	1	1.98534	5.53124e-08	-0.368162	9.999e-05	1.26548e-07	NSUN4	ALU
ENSG00000117758	1	28099695	28150963	+	1	-295582	ALU-REF_5	1	27804113	27804113	442	446.899	1.00001	1.01979	0.000685258	0.199496	0.00129987	0.000652325	STX12	ALU
ENSG00000117791	1	220921568	220958150	+	1	0	ALU-NREF_189	1	220954371	220954371	442	449.662	0.999999	1.02441	2.28292e-07	0.442949	9.999e-05	1.83896e-07	2019-03-02	ALU
ENSG00000119509	9	102861539	103063282	+	2	639610	ALU-NREF_1584	9	103702892	103702892	442	445.906	1.00001	2.0166	0.000240626	0.306209	0.00059994	0.000455275	INVS	ALU
ENSG00000119684	14	75480468	75518235	-	2	0	ALU-NREF_2254	14	75499581	75499581	442	439.011	1.00001	1.95003	9.9208e-12	0.303783	9.999e-05	2.27005e-11	MLH3	ALU
ENSG00000119718	14	75469615	75476292	+	2	23289	ALU-NREF_2254	14	75499581	75499581	442	445.291	0.999997	2.00546	1.00626e-26	0.446388	9.999e-05	1.31238e-26	EIF2B2	ALU
ENSG00000121060	17	54965271	54991399	-	3	17688	ALU-NREF_2441	17	54947583	54947583	442	448.065	1	3.03166	5.11641e-06	-0.1564	0.00019998	1.33625e-05	TRIM25	ALU
ENSG00000123870	19	53091759	53193749	+	2	0	SVA-REF_19	19	53096007	53096007	442	440.101	1.00001	1.99691	6.64042e-06	0.222985	9.999e-05	1.38781e-05	ZNF137P	SVA
ENSG00000125877	20	3189515	3204516	+	5	37902	ALU-NREF_2554	20	3242418	3242418	442	448.421	1.00001	4.9132	0.000175484	-0.171357	0.0009999	0.000773032	ITPA	ALU
ENSG00000125885	20	5931299	5975852	+	3	0	ALU-REF_853	20	5942988	5942988	442	437.457	1	2.85524	1.40936e-11	0.288431	9.999e-05	5.11457e-11	MCM8	ALU
ENSG00000125901	20	3026592	3028900	+	4	8967	ALU-REF_852	20	3037867	3037867	442	442.442	0.999997	4.02708	4.10075e-05	0.209063	0.00039996	0.000163674	MRPS26	ALU
ENSG00000125991	20	34129771	34145405	+	2	-180725	ALU-NREF_2574	20	33949046	33949046	442	454.82	1	2.02586	0.000490016	0.278272	0.0009999	0.000821539	ERGIC3	ALU
ENSG00000127249	3	193119867	193310900	-	4	-43285	L1-NREF_51	3	193354185	193354185	442	441.255	1.00001	4.00723	3.34669e-12	-0.43507	9.999e-05	1.39775e-11	ATP13A4	L1
ENSG00000128039	4	56212277	56239263	+	4	132699	ALU-NREF_640	4	56371962	56371962	442	435.558	0.999991	3.97219	2.13443e-13	0.40706	9.999e-05	1.26535e-12	SRD5A3	ALU
ENSG00000128534	7	117824087	117832878	+	2	61073	ALU-REF_451	7	117893951	117893951	442	435.061	1.00001	1.96351	0.000188938	-0.171574	0.00119988	0.000416777	NAA38	ALU
ENSG00000128891	15	40820883	40857256	-	2	-243076	ALU-NREF_2296	15	41100332	41100332	442	450.924	1	2.02264	6.8557e-06	0.274695	9.999e-05	1.11984e-05	C15orf57	ALU
ENSG00000129317	12	44122411	44152620	-	7	0	ALU-NREF_1966	12	44139571	44139571	442	442.237	0.983659	6.43212	1.28121e-12	0.474949	9.999e-05	1.24062e-11	PUS7L	ALU
ENSG00000131127	4	331604	378653	+	4	22387	ALU-REF_156	4	401040	401040	442	451.852	1.00001	3.80572	2.07319e-06	0.166802	9.999e-05	6.07367e-06	ZNF141	ALU
ENSG00000132294	8	132916336	133025889	+	4	0	ALU-NREF_1482	8	132942724	132942724	442	436.119	0.999988	3.97045	5.08122e-05	0.186106	0.00059994	0.000226432	EFR3A	ALU
ENSG00000135318	6	86159810	86205500	+	4	-15511	ALU-REF_371	6	86144299	86144299	442	449.446	1.00001	4.1758	5.13306e-15	0.586437	9.999e-05	1.26845e-14	NT5E	ALU
ENSG00000135506	12	58087739	58115340	+	3	-4461	ALU-NREF_1981	12	58083278	58083278	442	468.837	1	2.77413	0.000354913	-0.227799	0.0009999	0.000650755	OS9	ALU
ENSG00000135709	16	85061376	85127836	+	1	0	ALU-NREF_2402	16	85108708	85108708	442	438.612	1.00001	0.981151	3.24321e-05	0.270927	0.00019998	3.41183e-05	KIAA0513	ALU
ENSG00000135951	2	99613725	100106497	-	1	0	ALU-REF_64	2	99752965	99752965	442	449.942	0.999993	1.00391	2.35416e-11	-0.390972	9.999e-05	1.56845e-11	TSGA10	ALU
ENSG00000135976	2	97779234	97930258	+	1	651899	ALU-NREF_309	2	98582157	98582157	442	436.033	0.999997	0.987028	2.65552e-05	0.168539	0.00019998	2.97153e-05	ANKRD36	ALU
ENSG00000136011	12	103981052	104160505	+	1	132891	ALU-REF_684	12	104293396	104293396	442	435.029	1.00001	0.991847	0.00066162	0.312493	0.00059994	0.000724108	STAB2	ALU
ENSG00000136378	15	79051546	79190475	-	5	0	ALU-NREF_2341	15	79167169	79167169	442	447.86	1.00001	4.69633	1.99847e-06	0.332635	9.999e-05	8.02835e-06	ADAMTS7	ALU
ENSG00000137054	9	37485933	37503694	+	2	92654	ALU-NREF_1531	9	37596348	37596348	442	454.129	1.00001	1.99115	6.5206e-11	-0.42043	9.999e-05	7.13191e-11	POLR1E	ALU
ENSG00000137076	9	35696946	35758572	-	1	-44525	ALU-REF_546	9	35803097	35803097	442	440.986	1	1.00904	1.01561e-05	0.229068	9.999e-05	1.04905e-05	TLN1	ALU
ENSG00000137547	8	55047771	55060461	+	3	-75921	ALU-REF_490	8	54971850	54971850	442	440.986	0.999993	2.95878	8.70914e-07	0.189859	9.999e-05	2.65253e-06	MRPL15	ALU
ENSG00000137573	8	70378860	70573150	+	2	-21246	ALU-REF_498	8	70357614	70357614	442	1016.58	0.999999	4.63914	0.0160813	-0.168021	0.0631937	0.00120834	SULF1	ALU
ENSG00000138185	10	97471537	97698480	+	3	0	ALU-NREF_1724	10	97668538	97668538	442	444.849	1.00001	3.02201	9.38888e-17	0.487885	9.999e-05	2.26281e-16	ENTPD1	ALU
ENSG00000138346	10	70173822	70231879	-	4	-40218	ALU-REF_593	10	70272097	70272097	442	443.122	0.999999	3.90413	1.15361e-16	0.530681	9.999e-05	4.12246e-16	DNA2	ALU
ENSG00000138744	4	76831810	76912115	-	2	-81709	ALU-NREF_668	4	76993824	76993824	442	453.816	1.00001	2.02243	1.08041e-06	-0.336563	9.999e-05	1.56996e-06	NAAA	ALU
ENSG00000139921	14	51706881	51722759	+	4	0	ALU-NREF_2218	14	51719000	51719000	442	437.608	0.999997	3.93716	2.21691e-11	0.335251	9.999e-05	1.09586e-10	TMX1	ALU
ENSG00000140368	15	77285701	77329673	+	3	431924	ALU-NREF_2337	15	77761597	77761597	442	466.668	1	2.95178	1.16102e-05	0.284826	9.999e-05	1.95347e-05	PSTPIP1	ALU
ENSG00000140386	15	76640527	77197785	-	3	0	ALU-NREF_2336	15	77092501	77092501	442	450.406	1	2.90448	5.05389e-05	-0.206007	9.999e-05	0.000124461	SCAPER	ALU
ENSG00000140391	15	77336360	77376326	-	3	-385271	ALU-NREF_2337	15	77761597	77761597	442	457.571	0.999993	2.89585	1.10099e-06	0.291872	9.999e-05	2.06422e-06	TSPAN3	ALU
ENSG00000141141	17	35969788	36003493	-	4	47760	ALU-NREF_2429	17	35922028	35922028	442	445.744	1	4.0099	1.01782e-08	-0.300372	9.999e-05	3.53703e-08	DDX52	ALU
ENSG00000141560	17	80674560	80688204	+	2	71788	SVA-NREF_98	17	80759992	80759992	442	442.852	1.00001	2.00159	1.61108e-05	0.290557	9.999e-05	3.16424e-05	FN3KRP	SVA
ENSG00000142794	1	21766622	21811498	+	2	-15381	ALU-NREF_17	1	21751241	21751241	442	428.274	0.999994	1.93976	0.000241947	0.399747	0.00119988	0.000586773	NBPF3	ALU
ENSG00000143079	1	112938804	113006078	+	4	0	ALU-NREF_103	1	112992009	112992009	442	444.255	1.00001	3.78642	4.24352e-08	-0.219103	9.999e-05	1.48442e-07	CTTNBP2NL	ALU
ENSG00000143498	1	222731245	222763275	-	2	-107422	ALU-NREF_191	1	222870697	222870697	442	449.079	0.999999	2.00738	0.0006046	0.160842	0.00049995	0.00109648	TAF1A	ALU
ENSG00000144231	2	128603841	128615731	-	2	-23173	ALU-NREF_329	2	128638904	128638904	442	452.003	0.999996	2.01168	0.000359932	0.16352	0.00169983	0.00062057	POLR2D	ALU
ENSG00000145246	4	47487306	47595503	+	2	0	ALU-NREF_638	4	47496529	47496529	442	433.788	0.999996	1.98048	7.32253e-06	-0.208875	9.999e-05	1.76361e-05	ATP10D	ALU
ENSG00000145730	5	102089686	102366809	+	1	0	ALU-REF_299	5	102163355	102163355	442	441.245	1	1.00826	0.0010625	-0.171081	0.00149985	0.00108192	PAM	ALU
ENSG00000146733	7	56078745	56119297	-	4	227388	ALU-NREF_1234	7	55851357	55851357	442	439.917	1	3.91918	5.05485e-20	0.555196	9.999e-05	2.42008e-19	PSPH	ALU
ENSG00000149084	11	43577987	43878167	+	4	0	ALU-NREF_1825	11	43877448	43877448	442	447.147	1	4.05043	3.50087e-56	-0.86266	9.999e-05	3.29433e-56	HSD17B12	ALU
ENSG00000151690	2	191273082	191399448	+	1	79269	L1-NREF_29	2	191478717	191478717	442	439.68	1	1.00666	1.89377e-14	-0.525011	9.999e-05	2.22933e-14	MFSD6	L1
ENSG00000152213	13	50202436	50208008	+	3	-29065	ALU-NREF_2104	13	50173371	50173371	442	454.723	0.999989	3.09379	1.09083e-07	-0.28231	9.999e-05	2.21835e-07	ARL11	ALU
ENSG00000152348	5	81267845	81574396	+	5	-85365	ALU-REF_284	5	81182480	81182480	442	468.578	0.999998	5.41247	0.000127375	0.220099	0.00039996	0.000431629	ATG10	ALU
ENSG00000152558	11	102267064	102369532	-	6	0	ALU-NREF_1866	11	102348326	102348326	442	449.295	0.997364	6.12154	3.61287e-06	0.256937	9.999e-05	1.89366e-05	TMEM123	ALU
ENSG00000152601	3	151961618	152183569	+	2	0	ALU-NREF_563	3	152053972	152053972	442	442.799	1	2.02899	4.45522e-07	0.299288	9.999e-05	8.82589e-07	MBNL1	ALU
ENSG00000155115	6	111279764	111289093	+	2	6121	ALU-REF_381	6	111295214	111295214	442	443.424	0.999996	2.00541	7.57783e-05	0.210362	0.00039996	0.00014796	GTF3C6	ALU
ENSG00000156253	21	30376706	30391699	-	1	-210118	ALU-REF_881	21	30601817	30601817	442	448.669	1.00001	1.01787	3.56479e-05	0.27598	9.999e-05	3.16728e-05	RWDD2B	ALU
ENSG00000156398	10	104474296	104503249	+	2	305112	ALU-NREF_1726	10	104808361	104808361	442	426.267	0.999998	1.97416	2.12868e-05	-0.467971	9.999e-05	5.8952e-05	SFXN2	ALU
ENSG00000156510	10	70980060	71027315	+	6	-6726	SVA-NREF_71	10	70973334	70973334	442	444.396	1.0022	5.8219	5.31014e-07	0.422617	9.999e-05	2.79847e-06	HKDC1	SVA
ENSG00000157379	14	24759805	24769039	-	1	-25389	ALU-NREF_2193	14	24794428	24794428	442	450.331	1.00001	0.996818	0.00106622	0.232383	0.00139986	0.00095289	DHRS1	ALU
ENSG00000159479	1	43849589	43855479	-	2	-1977	ALU-REF_6	1	43857456	43857456	442	453.849	1	2.00319	3.96533e-06	0.24241	9.999e-05	5.89747e-06	MED8	ALU
ENSG00000159593	16	66836779	66907159	-	1	13585	ALU-REF_796	16	66823194	66823194	442	433.087	1	0.993699	1.52265e-07	0.238829	9.999e-05	2.01745e-07	NAE1	ALU
ENSG00000159899	9	35792152	35812269	+	1	0	ALU-REF_546	9	35803097	35803097	442	436.378	0.999999	0.989732	0.000934787	0.191075	0.0009999	0.00099756	NPR2	ALU
ENSG00000162614	1	78354199	78409580	+	6	197487	ALU-NREF_67	1	78607067	78607067	442	443.457	0.970785	5.46398	2.82401e-05	0.29396	0.00049995	0.000195447	NEXN	ALU
ENSG00000162616	1	78444860	78604133	+	7	2934	ALU-NREF_67	1	78607067	78607067	442	441.148	1	6.58512	5.85467e-06	0.219921	0.00019998	3.93592e-05	DNAJB4	ALU
ENSG00000162817	1	220863188	220872499	+	1	81872	ALU-NREF_189	1	220954371	220954371	442	440.791	0.999998	0.982221	6.95214e-10	0.527272	9.999e-05	7.20319e-10	C1orf115	ALU
ENSG00000163945	4	1341055	1381837	+	2	-39222	ALU-NREF_616	4	1301833	1301833	442	440.284	1.00001	2.04905	6.12198e-08	-0.204559	9.999e-05	1.3302e-07	UVSSA	ALU
ENSG00000164048	3	48282591	48343175	+	1	29151	ALU-NREF_488	3	48372326	48372326	442	440.716	1	0.992945	7.85188e-05	0.22246	9.999e-05	7.98552e-05	ZNF589	ALU
ENSG00000164197	5	63461672	63668696	+	3	-30956	ALU-NREF_856	5	63430716	63430716	442	448.529	0.999992	3.05648	3.99136e-05	-0.332854	0.00059994	0.000106975	RNF180	ALU
ENSG00000164484	6	130686880	130764208	+	10	-72082	ALU-NREF_1141	6	130614798	130614798	442	459.784	0.959836	9.85969	2.5129e-19	-0.495254	9.999e-05	2.63758e-18	TMEM200A	ALU
ENSG00000164823	8	90914088	90940116	+	2	129058	ALU-REF_504	8	91069174	91069174	442	438.029	1	2.00921	0.000374753	-0.184949	0.00089991	0.000800052	OSGIN2	ALU
ENSG00000164951	8	94870036	94938294	+	2	-707548	ALU-NREF_1422	8	94162488	94162488	442	444.342	0.999991	1.99359	0.000232606	-0.169874	0.00039996	0.000446288	PDP1	ALU
ENSG00000166527	12	8662072	8674962	+	2	-36493	ALU-REF_658	12	8625579	8625579	442	476.823	1	2.05045	3.9043e-06	0.31751	0.00069993	3.33522e-06	CLEC4D	ALU
ENSG00000166847	16	23652714	23681195	+	3	-124178	ALU-REF_785	16	23528536	23528536	442	436.604	1	2.91667	9.46882e-18	0.503982	9.999e-05	4.35669e-17	DCTN5	ALU
ENSG00000166896	12	58335325	58351052	+	4	8019	ALU-NREF_1982	12	58359071	58359071	442	444.309	0.999995	3.68481	5.77072e-10	0.385597	9.999e-05	1.91866e-09	XRCC6BP1	ALU
ENSG00000166974	18	32556893	32723434	+	3	0	ALU-REF_827	18	32661955	32661955	442	446.23	1	3.07008	0.000105618	-0.18923	0.00039996	0.000300395	MAPRE2	ALU
ENSG00000167074	22	41763338	41795330	+	1	345149	ALU-REF_890	22	42140479	42140479	442	437.198	1.00001	1.00556	3.42008e-17	0.529456	9.999e-05	5.08796e-17	TEF	ALU
ENSG00000167077	22	42095504	42195460	+	1	0	ALU-REF_890	22	42140479	42140479	442	440.058	0.999991	1.00494	5.13504e-10	0.379347	9.999e-05	5.63096e-10	MEI1	ALU
ENSG00000167220	18	44633775	44702745	-	4	-221984	ALU-NREF_2502	18	44924729	44924729	442	445.917	0.999995	3.98395	1.88103e-07	0.655795	9.999e-05	6.61652e-07	HDHD2	ALU
ENSG00000168032	3	40428648	40470110	+	1	-187026	ALU-NREF_481	3	40241622	40241622	442	430.486	1	0.991864	0.000152697	0.232939	0.00039996	0.000184758	ENTPD3	ALU
ENSG00000168300	8	52730141	52811735	-	4	0	ALU-REF_487	8	52737962	52737962	442	456.417	0.999999	4.10146	4.43e-07	-0.160881	9.999e-05	1.18041e-06	PCMTD1	ALU
ENSG00000169193	7	23636999	23684327	+	3	0	ALU-NREF_1201	7	23665685	23665685	442	447.946	1.00001	2.96007	5.26452e-48	0.913424	9.999e-05	3.71309e-48	CCDC126	ALU
ENSG00000169989	4	153690507	153700916	-	1	957684	L1-NREF_80	4	152732823	152732823	442	442.421	0.999999	0.996756	0.000478901	-0.425663	0.00049995	0.000474386	TIGD4	L1
ENSG00000170776	15	85923803	86292586	+	1	0	ALU-NREF_2349	15	86224963	86224963	442	451.507	1.00001	1.00068	0.000784621	-0.195335	0.00079992	0.000688919	AKAP13	ALU
ENSG00000171502	1	86194917	86622626	-	2	-118355	L1-REF_4	1	86740981	86740981	442	435.105	1.00001	1.94415	0.000378021	0.297863	0.00079992	0.000816592	COL24A1	L1
ENSG00000171530	5	76986992	77164604	-	5	0	ALU-REF_272	5	77048346	77048346	442	442.95	0.999994	4.74238	1.62009e-05	-0.194118	9.999e-05	7.52383e-05	TBCA	ALU
ENSG00000171928	17	18684309	18710027	+	1	81112	SVA-REF_16	17	18791139	18791139	442	440.586	1.00001	0.999613	1.57534e-12	0.331174	9.999e-05	1.70805e-12	TVP23B	SVA
ENSG00000172785	9	121042	188979	-	2	-73484	ALU-NREF_1492	9	262463	262463	442	435.105	0.999999	1.97275	7.42565e-22	0.624338	9.999e-05	3.03542e-21	CBWD1	ALU
ENSG00000173064	12	112597993	112819896	-	1	0	ALU-NREF_2042	12	112777131	112777131	442	430.087	0.999999	0.992411	0.000902565	0.25143	0.00059994	0.00105169	HECTD4	ALU
ENSG00000174236	12	27849429	27850566	+	4	14245	ALU-NREF_1936	12	27864811	27864811	442	448.788	1.00001	4.06877	1.04969e-05	-0.267833	0.00019998	3.65259e-05	REP15	ALU
ENSG00000174915	11	448269	491393	+	1	-20242	ALU-NREF_1761	11	428027	428027	442	436.292	1	0.980764	0.000601933	0.193781	0.00059994	0.000640658	PTDSS2	ALU
ENSG00000175581	11	73498362	73576178	+	2	0	ALU-NREF_1843	11	73562793	73562793	442	444.719	1.00001	1.97213	1.44155e-11	0.606291	9.999e-05	2.4626e-11	MRPL48	ALU
ENSG00000176148	11	33060964	33183917	+	8	51188	ALU-NREF_1811	11	33235105	33235105	442	434.274	1.00317	7.56075	3.54611e-05	-0.308466	0.00029997	0.000305575	TCP11L1	ALU
ENSG00000177465	14	74058411	74063200	+	2	123346	ALU-NREF_2252	14	74186546	74186546	442	436.594	0.999991	1.96187	0.000392244	0.234948	0.00089991	0.000835495	ACOT4	ALU
ENSG00000177873	3	40518605	40531727	+	1	-276983	ALU-NREF_481	3	40241622	40241622	442	442.345	1.00001	1.01679	0.000304373	0.116185	0.00059994	0.000307779	ZNF619	ALU
ENSG00000178878	12	12878852	12982915	+	3	0	L1-NREF_221	12	12933703	12933703	442	443.155	0.999991	2.99428	4.92084e-06	0.270307	9.999e-05	1.4322e-05	APOLD1	L1
ENSG00000182446	17	79523914	79615779	-	3	0	ALU-REF_821	17	79577681	79577681	442	442.043	1	3.05157	3.89177e-06	-0.211024	9.999e-05	1.18628e-05	NPLOC4	ALU
ENSG00000182504	3	101442770	101489406	+	1	-10384	ALU-NREF_514	3	101432386	101432386	442	438.18	0.999993	1.00275	0.000900123	-0.101996	0.00139986	0.000950309	CEP97	ALU
ENSG00000182511	15	91426926	91439006	+	2	-24829	ALU-REF_781	15	91402097	91402097	442	434.878	0.999999	1.98751	0.000297811	0.193393	0.00059994	0.00066243	FES	ALU
ENSG00000182952	6	26538634	26546482	+	1	415692	ALU-NREF_980	6	26962174	26962174	442	442.011	1	0.995973	4.98425e-06	-0.264825	9.999e-05	4.96266e-06	HMGN4	ALU
ENSG00000184254	15	101417920	101456831	+	4	0	ALU-REF_782	15	101453068	101453068	442	451.841	0.999996	3.67223	2.11657e-05	0.246617	9.999e-05	6.29042e-05	ALDH1A3	ALU
ENSG00000184293	12	9868457	9885895	-	3	0	ALU-NREF_1906	12	9871162	9871162	442	450.654	0.999992	2.98044	1.20147e-05	0.251892	9.999e-05	2.94176e-05	CLECL1	ALU
ENSG00000185485	3	195686620	195717189	-	3	-44580	ALU-NREF_611	3	195761769	195761769	442	432.353	1	2.99059	8.36246e-08	0.495255	9.999e-05	3.45812e-07	SDHAP1	ALU
ENSG00000185875	10	25305588	25315593	+	4	172332	ALU-NREF_1638	10	25487925	25487925	442	445.928	0.999996	4.02034	9.52238e-05	0.344332	0.00039996	0.000356297	THNSL1	ALU
ENSG00000186322	15	82804004	82810874	+	3	963000	ALU-REF_779	15	83773874	83773874	442	445.604	1	2.98555	3.22375e-05	-0.248607	0.00019998	8.93562e-05	GOLGA6L17P	ALU
ENSG00000186470	6	26365388	26378546	+	2	583628	ALU-NREF_980	6	26962174	26962174	442	434.856	0.999993	1.96091	0.000458051	-0.212397	0.00089991	0.000998949	BTN3A2	ALU
ENSG00000187984	9	95571671	95661890	+	2	18618	ALU-NREF_1563	9	95680508	95680508	442	429.828	0.999992	1.9639	2.72548e-07	0.455733	9.999e-05	7.80813e-07	ANKRD19P	ALU
ENSG00000187987	6	28399708	28411279	-	3	209512	ALU-REF_349	6	28190196	28190196	442	438.579	0.999998	2.99585	3.02577e-08	-0.237899	9.999e-05	1.02471e-07	ZSCAN23	ALU
ENSG00000188732	7	23719750	23742868	+	3	-54065	ALU-NREF_1201	7	23665685	23665685	442	438.86	1.00001	2.93759	1.19137e-07	0.358422	9.999e-05	3.87925e-07	FAM221A	ALU
ENSG00000188820	6	116782534	116784934	+	4	-31720	ALU-REF_383	6	116750814	116750814	442	451.68	1	3.64101	2.12245e-14	-0.457843	9.999e-05	4.0306e-14	FAM26F	ALU
ENSG00000196284	6	44777055	45632086	-	4	0	ALU-NREF_1013	6	45260479	45260479	442	433.799	0.999992	3.88247	2.36293e-05	-0.264865	9.999e-05	0.000109237	SUPT3H	ALU
ENSG00000196419	22	42017124	42060044	+	1	80435	ALU-REF_890	22	42140479	42140479	442	428.026	0.999991	1.00304	0.000584435	-0.113804	0.00059994	0.000716916	XRCC6	ALU
ENSG00000196449	1	38268617	38275126	-	1	-172591	ALU-NREF_27	1	38447717	38447717	442	440.694	1	1.01828	5.00575e-06	0.322901	9.999e-05	5.26373e-06	YRDC	ALU
ENSG00000196683	7	22852252	22862470	-	2	0	ALU-NREF_1200	7	22853492	22853492	442	443.025	1	2.0198	0.000238504	-0.141945	9.999e-05	0.00047369	TOMM7	ALU
ENSG00000196776	3	107762146	107809872	-	1	-83463	ALU-NREF_528	3	107893335	107893335	442	453.795	0.999998	0.996402	0.00121443	0.271449	0.00159984	0.00104023	CD47	ALU
ENSG00000196867	19	57050318	57068169	+	2	-26739	ALU-NREF_2551	19	57023579	57023579	442	448.831	1.00001	2.03105	2.51539e-08	0.35307	9.999e-05	3.98824e-08	ZFP28	ALU
ENSG00000197016	19	57078881	57100279	+	2	-55302	ALU-NREF_2551	19	57023579	57023579	442	442.335	1.00001	2.02324	3.5016e-09	0.321231	9.999e-05	6.98819e-09	ZNF470	ALU
ENSG00000197062	6	28234789	28245974	+	2	-44593	ALU-REF_349	6	28190196	28190196	442	451.097	0.999995	2.02108	2.99003e-05	0.186138	9.999e-05	5.00366e-05	RP5-874C20.3	ALU
ENSG00000197081	6	160390132	160534539	+	2	0	ALU-NREF_1183	6	160484025	160484025	442	438.989	0.999996	1.98594	8.88682e-05	0.263704	9.999e-05	0.000186547	IGF2R	ALU
ENSG00000197557	2	178477721	178483694	-	5	126249	ALU-NREF_369	2	178351472	178351472	442	439.41	1.00001	4.29737	0.000129	0.197083	0.00039996	0.00058005	TTC30A	ALU
ENSG00000198105	10	38091752	38147034	-	1	180946	ALU-NREF_1655	10	37910806	37910806	442	440.651	0.999998	1.00963	0.000680239	0.230705	0.00079992	0.000699949	ZNF248	ALU
ENSG00000198270	12	112369087	112450970	-	1	-326161	ALU-NREF_2042	12	112777131	112777131	442	441.871	1.00001	1.01621	3.71872e-07	0.381043	9.999e-05	3.79356e-07	TMEM116	ALU
ENSG00000198440	19	56909336	56947404	+	2	18657	ALU-NREF_2548	19	56966061	56966061	442	454.032	1.00001	2.0535	7.42506e-06	0.256573	9.999e-05	1.1454e-05	ZNF583	ALU
ENSG00000205038	8	110374707	110542559	+	5	0	ALU-REF_517	8	110510308	110510308	442	439.896	1.00001	4.42478	4.97443e-78	-0.903195	9.999e-05	5.06576e-77	PKHD1L1	ALU
ENSG00000205464	5	81575282	81682796	+	5	-392802	ALU-REF_284	5	81182480	81182480	442	436.939	0.999988	4.9233	4.71184e-05	0.18829	0.00039996	0.000256409	ATP6AP1L	ALU
ENSG00000205482	7	76682096	76688757	-	3	225766	ALU-NREF_1248	7	76456330	76456330	442	439.065	1.00001	2.877	0.000189254	0.348992	0.00119988	0.00057186	AC007000.12	ALU
ENSG00000205846	12	8608523	8630926	+	3	0	ALU-REF_658	12	8625579	8625579	442	513.178	0.999995	3.14468	0.000338199	0.24394	0.00939906	0.000353261	CLEC6A	ALU
ENSG00000206527	3	123209668	123304032	-	1	394	ALU-NREF_543	3	123209274	123209274	442	417.86	1	0.992782	1.42651e-07	0.264873	9.999e-05	3.09926e-07	PTPLB	ALU
ENSG00000211456	3	45730549	45786916	+	4	0	ALU-REF_117	3	45768352	45768352	442	441.687	1	3.97965	0.00016086	-0.182248	0.00069993	0.000643447	SACM1L	ALU
ENSG00000214078	20	34213954	34288906	-	2	-169660	ALU-NREF_2579	20	34458566	34458566	442	443.058	1	1.98908	1.63668e-36	-1.04585	9.999e-05	2.68706e-36	CPNE1	ALU
ENSG00000214439	7	76713204	76751433	-	3	145980	ALU-NREF_1251	7	76567224	76567224	442	439.755	1	2.94519	0.000295297	-0.248446	0.00109989	0.000900896	FAM185BP	ALU
ENSG00000215571	13	21893232	21895005	+	5	0	ALU-NREF_2069	13	21894780	21894780	442	442.799	1	4.83185	3.38938e-07	-0.319845	9.999e-05	1.59819e-06	GRK6P1	ALU
ENSG00000216901	6	28143967	28144452	+	2	45744	ALU-REF_349	6	28190196	28190196	442	440.273	0.999993	1.97982	5.21882e-14	-0.398078	9.999e-05	1.15669e-13	AL022393.7	ALU
ENSG00000221947	8	71581601	71702606	+	4	72201	ALU-NREF_1399	8	71774807	71774807	442	441.353	0.999995	3.95973	0.000278666	-0.234806	0.00119988	0.00111448	XKR9	ALU
ENSG00000226025	19	40170015	40177013	+	1	80532	ALU-REF_849	19	40257545	40257545	442	458.284	1	1.01843	7.18987e-09	-0.494996	9.999e-05	3.88155e-09	LGALS17A	ALU
ENSG00000226278	7	55832491	55840981	+	4	10376	ALU-NREF_1234	7	55851357	55851357	442	440.867	0.999993	3.93534	7.12708e-14	0.429104	9.999e-05	3.01817e-13	PSPHP1	ALU
ENSG00000226415	1	77165475	77166223	+	3	411705	ALU-NREF_64	1	77577928	77577928	442	1322.4	1	5.85355	0.00349613	0.275589	0.0456954	2.54237e-06	TPI1P1	ALU
ENSG00000226469	12	112364823	112366821	+	1	410310	ALU-NREF_2042	12	112777131	112777131	442	443.975	1	0.99654	0.000355597	0.281595	0.00049995	0.000343715	ADAM1B	ALU
ENSG00000226491	2	43024366	43025852	-	1	290	ALU-NREF_258	2	43024076	43024076	442	453.525	0.999995	1.00852	1.31545e-15	-0.420412	9.999e-05	5.6919e-16	FTOP1	ALU
ENSG00000227986	7	63815457	63816577	+	1	63603	ALU-NREF_1243	7	63880180	63880180	442	441.406	0.999997	1.00575	5.61064e-07	0.350533	9.999e-05	5.74249e-07	TRIM60P18	ALU
ENSG00000228653	7	63961204	63962107	+	1	-81024	ALU-NREF_1243	7	63880180	63880180	442	436.82	1	0.993309	1.45778e-05	0.327405	9.999e-05	1.62545e-05	HNRNPCP7	ALU
ENSG00000228716	5	79922048	80172279	-	3	0	ALU-REF_279	5	80039372	80039372	442	447.719	0.999991	3.00137	6.15703e-05	-0.216292	0.00019998	0.000165585	DHFR	ALU
ENSG00000229186	12	112337068	112340042	+	1	437089	ALU-NREF_2042	12	112777131	112777131	442	438.288	0.999994	1.00305	0.000325659	-0.249154	0.00079992	0.000346185	ADAM1A	ALU
ENSG00000230715	7	128292896	128293719	+	4	-83730	ALU-NREF_1298	7	128209166	128209166	442	442.248	1.00001	3.61459	2.51833e-10	-0.2374	9.999e-05	8.99748e-10	RP11-274B21.4	ALU
ENSG00000231259	2	87257801	87303536	-	1	-104171	L1-NREF_23	2	87407707	87407707	442	434.781	1	0.99978	0.000292976	-0.246039	9.999e-05	0.000328441	AC125232.1	L1
ENSG00000231360	1	144339739	144521058	+	3	429968	ALU-NREF_111	1	144951026	144951026	442	444.719	0.99999	3.02024	4.02122e-20	1.00174	9.999e-05	9.34115e-20	AL592284.1	ALU
ENSG00000231443	3	195664115	195665610	+	3	96159	ALU-NREF_611	3	195761769	195761769	442	443.824	0.999995	3.01966	3.64071e-06	0.431451	9.999e-05	1.0498e-05	AC024937.6	ALU
ENSG00000231464	3	195723610	195725104	+	3	36665	ALU-NREF_611	3	195761769	195761769	442	449.629	1	3.05158	2.4699e-08	0.639411	9.999e-05	5.71529e-08	AC024937.4	ALU
ENSG00000236624	1	45959539	45988719	-	2	-377389	ALU-REF_8	1	46366108	46366108	442	451.054	1	2.00591	5.31563e-12	0.399601	9.999e-05	6.48339e-12	CCDC163P	ALU
ENSG00000237440	19	20718632	20748615	-	1	0	ALU-NREF_2540	19	20745988	20745988	442	454.356	1.00001	1.01611	5.36962e-05	-0.231006	9.999e-05	4.28832e-05	ZNF737	ALU
ENSG00000241549	6	26839264	26924333	-	2	-37841	ALU-NREF_980	6	26962174	26962174	442	437.727	1.00001	1.97778	0.00018594	-0.237819	0.00079992	0.000395121	GUSBP2	ALU
ENSG00000242588	7	128171753	128269512	+	4	0	ALU-NREF_1298	7	128209166	128209166	442	455.316	0.999997	3.73141	7.64378e-06	-0.116232	9.999e-05	2.08021e-05	RP11-274B21.1	ALU
ENSG00000243679	7	128294024	128294776	+	4	-84858	ALU-NREF_1298	7	128209166	128209166	442	438.007	0.999988	3.66169	8.95439e-07	-0.189789	9.999e-05	3.67305e-06	RP11-274B21.3	ALU
ENSG00000249244	4	120312987	120316490	-	4	-323414	ALU-NREF_709	4	120639904	120639904	442	443.522	0.999988	3.95599	0.000311844	-0.190527	0.00119988	0.00120405	RP11-548H18.2	ALU
ENSG00000251595	4	419225	492945	-	4	18185	ALU-REF_156	4	401040	401040	442	448.129	1.00001	3.82838	5.06186e-06	0.260165	9.999e-05	1.66633e-05	ABCA11P	ALU
ENSG00000254685	1	74663897	75010112	+	5	137943	ALU-NREF_60	1	75148055	75148055	442	446.964	0.999988	5.01513	0.000220656	0.227241	0.00159984	0.00101949	FPGT	ALU
ENSG00000255753	12	9466999	9468769	-	3	-402393	ALU-NREF_1906	12	9871162	9871162	442	446.057	0.999995	3.00989	7.46354e-05	-0.224663	9.999e-05	0.000208154	RP11-22B23.2	ALU
ENSG00000256594	12	9787189	9811008	+	3	60154	ALU-NREF_1906	12	9871162	9871162	442	452.856	0.999988	3.06862	8.96039e-11	0.374747	9.999e-05	1.62143e-10	RP11-705C15.2	ALU
ENSG00000258493	14	35390072	35390212	+	2	11191	ALU-REF_741	14	35401403	35401403	442	443.295	0.999995	2.00725	5.86456e-05	-0.244379	0.00029997	0.000114813	RP11-73E17.3	ALU
ENSG00000259363	15	100347229	100417353	+	4	-3905	ALU-NREF_2360	15	100343324	100343324	442	452.51	1.00001	3.53937	1.89568e-10	0.551533	9.999e-05	4.09265e-10	CTD-2054N24.2	ALU
ENSG00000261652	15	55700747	55800432	+	2	0	ALU-NREF_2308	15	55702249	55702249	442	470.607	1	1.99001	1.2903e-07	0.69777	9.999e-05	1.01028e-07	C15orf65	ALU
ENSG00000268088	19	40184566	40186898	+	1	70647	ALU-REF_849	19	40257545	40257545	442	450.525	1	0.997275	0.000647887	-0.23911	0.00089991	0.000572651	AC093063.2	ALU
ENSG00000270863	12	11665658	11667070	+	4	-486620	ALU-NREF_1910	12	11179038	11179038	442	444.169	0.999987	3.82924	8.35221e-09	0.378836	9.999e-05	2.94167e-08	RP11-434C1.3	ALU
ENSG00000271529	7	128296017	128298845	-	4	86851	ALU-NREF_1298	7	128209166	128209166	442	445.324	0.99999	3.77713	0.000251416	-0.123465	0.00069993	0.000899682	CICP14	ALU

## Sheet: LCL.specific.TE-eQTL.0.05FDR+B
eQTL	gene	Chr_gene	Start_gene	End_gene	strand	nb_tested	dist_Gene	MEI	Chr_MEI	Pos_MEI	Pos_MEI2	df	dummy	Beta1	Beta2	P_nominal	slope	P_empirical	P_value	Gene_name	mei	mean_XP
ENSG00000003393_ALU-NREF_396	ENSG00000003393	2	202565278	202645912	-	3	0	ALU-NREF_396	2	202631460	202631460	442	437.36	1.00001	2.98212	6.0476e-07	0.220237	9.999e-05	2.06535e-06	ALS2	ALU	4.64604
ENSG00000005381_ALU-NREF_2445	ENSG00000005381	17	56347218	56358296	-	2	420991	ALU-NREF_2445	17	55926227	55926227	442	440.327	0.999992	1.98205	0.000161663	0.318328	0.00069993	0.000329732	MPO	ALU	0.0795252
ENSG00000059691_L1-REF_40	ENSG00000059691	4	152591657	152682175	-	2	250949	L1-REF_40	4	152340708	152340708	442	450.374	1.00001	2.02727	5.07064e-11	-0.283522	9.999e-05	6.76515e-11	PET112	L1	20.5373
ENSG00000065413_ALU-REF_92	ENSG00000065413	2	197831742	198175897	-	2	217125	ALU-REF_92	2	197614617	197614617	442	451.593	1.00001	1.96652	0.000228338	-0.11171	0.00019998	0.000383689	ANKRD44	ALU	64.6817
ENSG00000066032_ALU-NREF_304	ENSG00000066032	2	79412358	80875905	+	5	0	ALU-NREF_304	2	80769024	80769024	442	442.852	1.00001	4.89669	3.6562e-06	-0.240138	9.999e-05	1.75192e-05	CTNNA2	ALU	0.840453
ENSG00000068796_ALU-NREF_854	ENSG00000068796	5	61601990	61924409	+	4	0	ALU-NREF_854	5	61857118	61857118	442	454.55	1	3.7549	9.91668e-05	0.125647	0.00049995	0.000296413	KIF2A	ALU	40.8232
ENSG00000070081_ALU-REF_621	ENSG00000070081	11	17229701	17371521	+	2	-33861	ALU-REF_621	11	17195840	17195840	442	456.449	0.999997	2.01221	8.90189e-10	0.313447	9.999e-05	9.54221e-10	NUCB2	ALU	35.2835
ENSG00000071246_ALU-NREF_2255	ENSG00000071246	14	77228533	77249354	+	4	-112290	ALU-NREF_2255	14	77116243	77116243	442	438.32	1.00001	3.68531	5.94469e-05	0.239484	0.00039996	0.000235153	VASH1	ALU	1.82701
ENSG00000073803_ALU-REF_149	ENSG00000073803	3	185000730	185216845	+	2	0	ALU-REF_149	3	185017331	185017331	442	438.806	1.00001	1.95395	7.81244e-09	-0.367291	9.999e-05	1.72778e-08	MAP3K13	ALU	13.739
ENSG00000079819_ALU-NREF_1149	ENSG00000079819	6	131160488	131384462	-	7	0	ALU-NREF_1149	6	131273499	131273499	442	449.219	0.978567	6.71515	5.88453e-05	-0.202667	0.00039996	0.000410831	EPB41L2	ALU	50.9986
ENSG00000080618_ALU-NREF_2101	ENSG00000080618	13	46627322	46679211	-	3	0	ALU-NREF_2101	13	46647748	46647748	442	449.78	1.00001	3.0343	3.57088e-07	0.318211	9.999e-05	8.55204e-07	CPB2	ALU	0.106873
ENSG00000084754_ALU-NREF_247	ENSG00000084754	2	26413505	26513336	-	2	0	ALU-NREF_247	2	26473946	26473946	442	432.784	0.999992	1.96559	4.28906e-05	-0.272675	9.999e-05	0.000101366	HADHA	ALU	135.123
ENSG00000088854_ALU-NREF_2554	ENSG00000088854	20	3229952	3388272	-	5	0	ALU-NREF_2554	20	3242418	3242418	442	447.417	1	5.00725	1.17592e-08	0.374268	9.999e-05	4.79526e-08	C20orf194	ALU	0.482309
ENSG00000095739_ALU-NREF_1643	ENSG00000095739	10	28966272	28971868	+	2	130673	ALU-NREF_1643	10	29102541	29102541	442	483.977	1.00001	1.90855	2.0447e-07	-0.300658	9.999e-05	1.03641e-07	BAMBI	ALU	0.563556
ENSG00000100505_ALU-NREF_2218	ENSG00000100505	14	51441981	51562779	-	2	-156221	ALU-NREF_2218	14	51719000	51719000	442	435.115	0.999996	1.95366	1.69732e-08	0.334083	9.999e-05	4.28147e-08	TRIM9	ALU	0.648555
ENSG00000101353_ALU-REF_865	ENSG00000101353	20	35729630	35870022	-	1	0	ALU-REF_865	20	35815610	35815610	442	417.504	0.999996	0.976515	5.56819e-05	0.262079	0.00029997	8.75563e-05	MROH8	ALU	2.10267
ENSG00000103249_ALU-REF_783	ENSG00000103249	16	1494936	1525581	-	1	618308	ALU-REF_783	16	876628	876628	442	440.511	0.999997	1.00485	0.000395688	-0.175717	0.00059994	0.000406729	CLCN7	ALU	18.0193
ENSG00000103365_ALU-REF_785	ENSG00000103365	16	23474864	23533316	-	3	0	ALU-REF_785	16	23528536	23528536	442	439.162	0.999998	2.99977	4.37488e-05	-0.206889	0.00019998	0.000138874	GGA2	ALU	77.455
ENSG00000104093_ALU-REF_773	ENSG00000104093	15	51739909	51915030	-	3	0	ALU-REF_773	15	51897702	51897702	442	441.795	1.00001	2.99713	3.07923e-09	0.279555	9.999e-05	9.30535e-09	DMXL2	ALU	12.7147
ENSG00000104388_ALU-NREF_1396	ENSG00000104388	8	61429417	61536186	+	3	0	ALU-NREF_1396	8	61526797	61526797	442	440.36	0.999995	2.95901	1.53259e-10	0.345217	9.999e-05	4.90297e-10	RAB2A	ALU	58.7744
ENSG00000105205_ALU-REF_849	ENSG00000105205	19	40221891	40228668	-	1	-28877	ALU-REF_849	19	40257545	40257545	442	467.014	0.999991	1.03521	0.000137685	-0.339277	0.00089991	9.21334e-05	CLC	ALU	0.474392
ENSG00000111696_ALU-REF_684	ENSG00000111696	12	104164232	104234975	-	1	-58421	ALU-REF_684	12	104293396	104293396	442	446.252	0.999998	0.996308	7.40755e-07	0.380159	9.999e-05	6.52979e-07	NT5DC3	ALU	3.14291
ENSG00000111796_ALU-NREF_1906	ENSG00000111796	12	9747148	9760482	-	3	-110680	ALU-NREF_1906	12	9871162	9871162	442	455.176	0.999989	3.07619	1.9444e-06	-0.298548	9.999e-05	4.20882e-06	KLRB1	ALU	0.0936281
ENSG00000111816_ALU-NREF_1108	ENSG00000111816	6	116252313	116381921	-	4	0	ALU-NREF_1108	6	116307096	116307096	442	453.255	1	3.75419	0.000144122	0.177279	0.00049995	0.000444934	FRK	ALU	2.36176
ENSG00000112992_ALU-NREF_826	ENSG00000112992	5	43602795	43707507	+	4	-60990	ALU-NREF_826	5	43541805	43541805	442	445.378	1	3.92391	2.2395e-11	-0.349565	9.999e-05	7.3775e-11	NNT	ALU	45.7868
ENSG00000113790_ALU-REF_149	ENSG00000113790	3	184908413	184999778	-	2	-17553	ALU-REF_149	3	185017331	185017331	442	444.007	1	2.00698	2.78277e-05	-0.27949	0.00019998	5.35503e-05	EHHADH	ALU	2.05373
ENSG00000115902_ALU-NREF_282	ENSG00000115902	2	65215612	65250999	+	4	-51829	ALU-NREF_282	2	65163783	65163783	442	436.475	0.999997	3.95919	3.49336e-09	-0.352888	9.999e-05	1.73089e-08	SLC1A4	ALU	33.7268
ENSG00000116679_ALU-REF_24	ENSG00000116679	1	185265521	185286461	-	2	-86636	ALU-REF_24	1	185373097	185373097	442	443.036	0.999995	1.98351	6.61145e-06	-0.231196	9.999e-05	1.2792e-05	IVNS1ABP	ALU	57.4849
ENSG00000116815_ALU-REF_20	ENSG00000116815	1	117057158	117113661	-	2	0	ALU-REF_20	1	117078165	117078165	442	452.435	1.00001	2.00925	1.04475e-05	-0.317563	0.00019998	1.65057e-05	CD58	ALU	67.3797
ENSG00000119509_ALU-NREF_1584	ENSG00000119509	9	102861539	103063282	+	2	639610	ALU-NREF_1584	9	103702892	103702892	442	445.906	1.00001	2.0166	0.000240626	0.306209	0.00059994	0.000455275	INVS	ALU	8.50499
ENSG00000121060_ALU-NREF_2441	ENSG00000121060	17	54965271	54991399	-	3	17688	ALU-NREF_2441	17	54947583	54947583	442	448.065	1	3.03166	5.11641e-06	-0.1564	0.00019998	1.33625e-05	TRIM25	ALU	53.111
ENSG00000123870_SVA-REF_19	ENSG00000123870	19	53091759	53193749	+	2	0	SVA-REF_19	19	53096007	53096007	442	440.101	1.00001	1.99691	6.64042e-06	0.222985	9.999e-05	1.38781e-05	ZNF137P	SVA	2.67993
ENSG00000125901_ALU-REF_852	ENSG00000125901	20	3026592	3028900	+	4	8967	ALU-REF_852	20	3037867	3037867	442	442.442	0.999997	4.02708	4.10075e-05	0.209063	0.00039996	0.000163674	MRPS26	ALU	33.5278
ENSG00000127249_L1-NREF_51	ENSG00000127249	3	193119867	193310900	-	4	-43285	L1-NREF_51	3	193354185	193354185	442	441.255	1.00001	4.00723	3.34669e-12	-0.43507	9.999e-05	1.39775e-11	ATP13A4	L1	1.39194
ENSG00000128534_ALU-REF_451	ENSG00000128534	7	117824087	117832878	+	2	61073	ALU-REF_451	7	117893951	117893951	442	435.061	1.00001	1.96351	0.000188938	-0.171574	0.00119988	0.000416777	NAA38	ALU	55.4775
ENSG00000129317_ALU-NREF_1966	ENSG00000129317	12	44122411	44152620	-	7	0	ALU-NREF_1966	12	44139571	44139571	442	442.237	0.983659	6.43212	1.28121e-12	0.474949	9.999e-05	1.24062e-11	PUS7L	ALU	5.8806
ENSG00000131127_ALU-REF_156	ENSG00000131127	4	331604	378653	+	4	22387	ALU-REF_156	4	401040	401040	442	451.852	1.00001	3.80572	2.07319e-06	0.166802	9.999e-05	6.07367e-06	ZNF141	ALU	6.30909
ENSG00000132294_ALU-NREF_1482	ENSG00000132294	8	132916336	133025889	+	4	0	ALU-NREF_1482	8	132942724	132942724	442	436.119	0.999988	3.97045	5.08122e-05	0.186106	0.00059994	0.000226432	EFR3A	ALU	22.6565
ENSG00000135318_ALU-REF_371	ENSG00000135318	6	86159810	86205500	+	4	-15511	ALU-REF_371	6	86144299	86144299	442	449.446	1.00001	4.1758	5.13306e-15	0.586437	9.999e-05	1.26845e-14	NT5E	ALU	5.23993
ENSG00000135709_ALU-NREF_2402	ENSG00000135709	16	85061376	85127836	+	1	0	ALU-NREF_2402	16	85108708	85108708	442	438.612	1.00001	0.981151	3.24321e-05	0.270927	0.00019998	3.41183e-05	KIAA0513	ALU	3.85618
ENSG00000136378_ALU-NREF_2341	ENSG00000136378	15	79051546	79190475	-	5	0	ALU-NREF_2341	15	79167169	79167169	442	447.86	1.00001	4.69633	1.99847e-06	0.332635	9.999e-05	8.02835e-06	ADAMTS7	ALU	1.01296
ENSG00000137076_ALU-REF_546	ENSG00000137076	9	35696946	35758572	-	1	-44525	ALU-REF_546	9	35803097	35803097	442	440.986	1	1.00904	1.01561e-05	0.229068	9.999e-05	1.04905e-05	TLN1	ALU	124.883
ENSG00000137547_ALU-REF_490	ENSG00000137547	8	55047771	55060461	+	3	-75921	ALU-REF_490	8	54971850	54971850	442	440.986	0.999993	2.95878	8.70914e-07	0.189859	9.999e-05	2.65253e-06	MRPL15	ALU	60.0471
ENSG00000140368_ALU-NREF_2337	ENSG00000140368	15	77285701	77329673	+	3	431924	ALU-NREF_2337	15	77761597	77761597	442	466.668	1	2.95178	1.16102e-05	0.284826	9.999e-05	1.95347e-05	PSTPIP1	ALU	11.3698
ENSG00000140386_ALU-NREF_2336	ENSG00000140386	15	76640527	77197785	-	3	0	ALU-NREF_2336	15	77092501	77092501	442	450.406	1	2.90448	5.05389e-05	-0.206007	9.999e-05	0.000124461	SCAPER	ALU	6.02163
ENSG00000141141_ALU-NREF_2429	ENSG00000141141	17	35969788	36003493	-	4	47760	ALU-NREF_2429	17	35922028	35922028	442	445.744	1	4.0099	1.01782e-08	-0.300372	9.999e-05	3.53703e-08	DDX52	ALU	14.4066
ENSG00000141560_SVA-NREF_98	ENSG00000141560	17	80674560	80688204	+	2	71788	SVA-NREF_98	17	80759992	80759992	442	442.852	1.00001	2.00159	1.61108e-05	0.290557	9.999e-05	3.16424e-05	FN3KRP	SVA	29.9273
ENSG00000142794_ALU-NREF_17	ENSG00000142794	1	21766622	21811498	+	2	-15381	ALU-NREF_17	1	21751241	21751241	442	428.274	0.999994	1.93976	0.000241947	0.399747	0.00119988	0.000586773	NBPF3	ALU	2.11876
ENSG00000143079_ALU-NREF_103	ENSG00000143079	1	112938804	113006078	+	4	0	ALU-NREF_103	1	112992009	112992009	442	444.255	1.00001	3.78642	4.24352e-08	-0.219103	9.999e-05	1.48442e-07	CTTNBP2NL	ALU	3.89758
ENSG00000145246_ALU-NREF_638	ENSG00000145246	4	47487306	47595503	+	2	0	ALU-NREF_638	4	47496529	47496529	442	433.788	0.999996	1.98048	7.32253e-06	-0.208875	9.999e-05	1.76361e-05	ATP10D	ALU	11.8557
ENSG00000151690_L1-NREF_29	ENSG00000151690	2	191273082	191399448	+	1	79269	L1-NREF_29	2	191478717	191478717	442	439.68	1	1.00666	1.89377e-14	-0.525011	9.999e-05	2.22933e-14	MFSD6	L1	15.1743
ENSG00000152213_ALU-NREF_2104	ENSG00000152213	13	50202436	50208008	+	3	-29065	ALU-NREF_2104	13	50173371	50173371	442	454.723	0.999989	3.09379	1.09083e-07	-0.28231	9.999e-05	2.21835e-07	ARL11	ALU	5.00467
ENSG00000152558_ALU-NREF_1866	ENSG00000152558	11	102267064	102369532	-	6	0	ALU-NREF_1866	11	102348326	102348326	442	449.295	0.997364	6.12154	3.61287e-06	0.256937	9.999e-05	1.89366e-05	TMEM123	ALU	76.4458
ENSG00000152601_ALU-NREF_563	ENSG00000152601	3	151961618	152183569	+	2	0	ALU-NREF_563	3	152053972	152053972	442	442.799	1	2.02899	4.45522e-07	0.299288	9.999e-05	8.82589e-07	MBNL1	ALU	97.057
ENSG00000155115_ALU-REF_381	ENSG00000155115	6	111279764	111289093	+	2	6121	ALU-REF_381	6	111295214	111295214	442	443.424	0.999996	2.00541	7.57783e-05	0.210362	0.00039996	0.00014796	GTF3C6	ALU	78.678
ENSG00000156398_ALU-NREF_1726	ENSG00000156398	10	104474296	104503249	+	2	305112	ALU-NREF_1726	10	104808361	104808361	442	426.267	0.999998	1.97416	2.12868e-05	-0.467971	9.999e-05	5.8952e-05	SFXN2	ALU	11.3492
ENSG00000156510_SVA-NREF_71	ENSG00000156510	10	70980060	71027315	+	6	-6726	SVA-NREF_71	10	70973334	70973334	442	444.396	1.0022	5.8219	5.31014e-07	0.422617	9.999e-05	2.79847e-06	HKDC1	SVA	0.0792946
ENSG00000159593_ALU-REF_796	ENSG00000159593	16	66836779	66907159	-	1	13585	ALU-REF_796	16	66823194	66823194	442	433.087	1	0.993699	1.52265e-07	0.238829	9.999e-05	2.01745e-07	NAE1	ALU	47.1785
ENSG00000162614_ALU-NREF_67	ENSG00000162614	1	78354199	78409580	+	6	197487	ALU-NREF_67	1	78607067	78607067	442	443.457	0.970785	5.46398	2.82401e-05	0.29396	0.00049995	0.000195447	NEXN	ALU	4.26429
ENSG00000162817_ALU-NREF_189	ENSG00000162817	1	220863188	220872499	+	1	81872	ALU-NREF_189	1	220954371	220954371	442	440.791	0.999998	0.982221	6.95214e-10	0.527272	9.999e-05	7.20319e-10	C1orf115	ALU	1.84401
ENSG00000164048_ALU-NREF_488	ENSG00000164048	3	48282591	48343175	+	1	29151	ALU-NREF_488	3	48372326	48372326	442	440.716	1	0.992945	7.85188e-05	0.22246	9.999e-05	7.98552e-05	ZNF589	ALU	13.501
ENSG00000164197_ALU-NREF_856	ENSG00000164197	5	63461672	63668696	+	3	-30956	ALU-NREF_856	5	63430716	63430716	442	448.529	0.999992	3.05648	3.99136e-05	-0.332854	0.00059994	0.000106975	RNF180	ALU	0.523582
ENSG00000164484_ALU-NREF_1141	ENSG00000164484	6	130686880	130764208	+	10	-72082	ALU-NREF_1141	6	130614798	130614798	442	459.784	0.959836	9.85969	2.5129e-19	-0.495254	9.999e-05	2.63758e-18	TMEM200A	ALU	4.25199
ENSG00000164951_ALU-NREF_1422	ENSG00000164951	8	94870036	94938294	+	2	-707548	ALU-NREF_1422	8	94162488	94162488	442	444.342	0.999991	1.99359	0.000232606	-0.169874	0.00039996	0.000446288	PDP1	ALU	3.25759
ENSG00000166527_ALU-REF_658	ENSG00000166527	12	8662072	8674962	+	2	-36493	ALU-REF_658	12	8625579	8625579	442	476.823	1	2.05045	3.9043e-06	0.31751	0.00069993	3.33522e-06	CLEC4D	ALU	0.0757419
ENSG00000166847_ALU-REF_785	ENSG00000166847	16	23652714	23681195	+	3	-124178	ALU-REF_785	16	23528536	23528536	442	436.604	1	2.91667	9.46882e-18	0.503982	9.999e-05	4.35669e-17	DCTN5	ALU	35.3563
ENSG00000167074_ALU-REF_890	ENSG00000167074	22	41763338	41795330	+	1	345149	ALU-REF_890	22	42140479	42140479	442	437.198	1.00001	1.00556	3.42008e-17	0.529456	9.999e-05	5.08796e-17	TEF	ALU	2.44071
ENSG00000167077_ALU-REF_890	ENSG00000167077	22	42095504	42195460	+	1	0	ALU-REF_890	22	42140479	42140479	442	440.058	0.999991	1.00494	5.13504e-10	0.379347	9.999e-05	5.63096e-10	MEI1	ALU	39.3677
ENSG00000167220_ALU-NREF_2502	ENSG00000167220	18	44633775	44702745	-	4	-221984	ALU-NREF_2502	18	44924729	44924729	442	445.917	0.999995	3.98395	1.88103e-07	0.655795	9.999e-05	6.61652e-07	HDHD2	ALU	19.4212
ENSG00000168300_ALU-REF_487	ENSG00000168300	8	52730141	52811735	-	4	0	ALU-REF_487	8	52737962	52737962	442	456.417	0.999999	4.10146	4.43e-07	-0.160881	9.999e-05	1.18041e-06	PCMTD1	ALU	13.9093
ENSG00000169193_ALU-NREF_1201	ENSG00000169193	7	23636999	23684327	+	3	0	ALU-NREF_1201	7	23665685	23665685	442	447.946	1.00001	2.96007	5.26452e-48	0.913424	9.999e-05	3.71309e-48	CCDC126	ALU	5.56718
ENSG00000169989_L1-NREF_80	ENSG00000169989	4	153690507	153700916	-	1	957684	L1-NREF_80	4	152732823	152732823	442	442.421	0.999999	0.996756	0.000478901	-0.425663	0.00049995	0.000474386	TIGD4	L1	0.305003
ENSG00000171530_ALU-REF_272	ENSG00000171530	5	76986992	77164604	-	5	0	ALU-REF_272	5	77048346	77048346	442	442.95	0.999994	4.74238	1.62009e-05	-0.194118	9.999e-05	7.52383e-05	TBCA	ALU	221.88
ENSG00000176148_ALU-NREF_1811	ENSG00000176148	11	33060964	33183917	+	8	51188	ALU-NREF_1811	11	33235105	33235105	442	434.274	1.00317	7.56075	3.54611e-05	-0.308466	0.00029997	0.000305575	TCP11L1	ALU	9.21758
ENSG00000178878_L1-NREF_221	ENSG00000178878	12	12878852	12982915	+	3	0	L1-NREF_221	12	12933703	12933703	442	443.155	0.999991	2.99428	4.92084e-06	0.270307	9.999e-05	1.4322e-05	APOLD1	L1	3.59395
ENSG00000182446_ALU-REF_821	ENSG00000182446	17	79523914	79615779	-	3	0	ALU-REF_821	17	79577681	79577681	442	442.043	1	3.05157	3.89177e-06	-0.211024	9.999e-05	1.18628e-05	NPLOC4	ALU	36.9584
ENSG00000182952_ALU-NREF_980	ENSG00000182952	6	26538634	26546482	+	1	415692	ALU-NREF_980	6	26962174	26962174	442	442.011	1	0.995973	4.98425e-06	-0.264825	9.999e-05	4.96266e-06	HMGN4	ALU	94.0195
ENSG00000184254_ALU-REF_782	ENSG00000184254	15	101417920	101456831	+	4	0	ALU-REF_782	15	101453068	101453068	442	451.841	0.999996	3.67223	2.11657e-05	0.246617	9.999e-05	6.29042e-05	ALDH1A3	ALU	0.658435
ENSG00000184293_ALU-NREF_1906	ENSG00000184293	12	9868457	9885895	-	3	0	ALU-NREF_1906	12	9871162	9871162	442	450.654	0.999992	2.98044	1.20147e-05	0.251892	9.999e-05	2.94176e-05	CLECL1	ALU	88.3153
ENSG00000185485_ALU-NREF_611	ENSG00000185485	3	195686620	195717189	-	3	-44580	ALU-NREF_611	3	195761769	195761769	442	432.353	1	2.99059	8.36246e-08	0.495255	9.999e-05	3.45812e-07	SDHAP1	ALU	20.315
ENSG00000185875_ALU-NREF_1638	ENSG00000185875	10	25305588	25315593	+	4	172332	ALU-NREF_1638	10	25487925	25487925	442	445.928	0.999996	4.02034	9.52238e-05	0.344332	0.00039996	0.000356297	THNSL1	ALU	3.05382
ENSG00000187984_ALU-NREF_1563	ENSG00000187984	9	95571671	95661890	+	2	18618	ALU-NREF_1563	9	95680508	95680508	442	429.828	0.999992	1.9639	2.72548e-07	0.455733	9.999e-05	7.80813e-07	ANKRD19P	ALU	0.315046
ENSG00000196284_ALU-NREF_1013	ENSG00000196284	6	44777055	45632086	-	4	0	ALU-NREF_1013	6	45260479	45260479	442	433.799	0.999992	3.88247	2.36293e-05	-0.264865	9.999e-05	0.000109237	SUPT3H	ALU	2.6492
ENSG00000196449_ALU-NREF_27	ENSG00000196449	1	38268617	38275126	-	1	-172591	ALU-NREF_27	1	38447717	38447717	442	440.694	1	1.01828	5.00575e-06	0.322901	9.999e-05	5.26373e-06	YRDC	ALU	21.0506
ENSG00000196683_ALU-NREF_1200	ENSG00000196683	7	22852252	22862470	-	2	0	ALU-NREF_1200	7	22853492	22853492	442	443.025	1	2.0198	0.000238504	-0.141945	9.999e-05	0.00047369	TOMM7	ALU	203.293
ENSG00000196867_ALU-NREF_2551	ENSG00000196867	19	57050318	57068169	+	2	-26739	ALU-NREF_2551	19	57023579	57023579	442	448.831	1.00001	2.03105	2.51539e-08	0.35307	9.999e-05	3.98824e-08	ZFP28	ALU	1.10085
ENSG00000197016_ALU-NREF_2551	ENSG00000197016	19	57078881	57100279	+	2	-55302	ALU-NREF_2551	19	57023579	57023579	442	442.335	1.00001	2.02324	3.5016e-09	0.321231	9.999e-05	6.98819e-09	ZNF470	ALU	1.92289
ENSG00000197062_ALU-REF_349	ENSG00000197062	6	28234789	28245974	+	2	-44593	ALU-REF_349	6	28190196	28190196	442	451.097	0.999995	2.02108	2.99003e-05	0.186138	9.999e-05	5.00366e-05	RP5-874C20.3	ALU	6.21961
ENSG00000197081_ALU-NREF_1183	ENSG00000197081	6	160390132	160534539	+	2	0	ALU-NREF_1183	6	160484025	160484025	442	438.989	0.999996	1.98594	8.88682e-05	0.263704	9.999e-05	0.000186547	IGF2R	ALU	30.5726
ENSG00000197557_ALU-NREF_369	ENSG00000197557	2	178477721	178483694	-	5	126249	ALU-NREF_369	2	178351472	178351472	442	439.41	1.00001	4.29737	0.000129	0.197083	0.00039996	0.00058005	TTC30A	ALU	1.51095
ENSG00000205038_ALU-REF_517	ENSG00000205038	8	110374707	110542559	+	5	0	ALU-REF_517	8	110510308	110510308	442	439.896	1.00001	4.42478	4.97443e-78	-0.903195	9.999e-05	5.06576e-77	PKHD1L1	ALU	19.0016
ENSG00000205482_ALU-NREF_1248	ENSG00000205482	7	76682096	76688757	-	3	225766	ALU-NREF_1248	7	76456330	76456330	442	439.065	1.00001	2.877	0.000189254	0.348992	0.00119988	0.00057186	AC007000.12	ALU	0.43381
ENSG00000206527_ALU-NREF_543	ENSG00000206527	3	123209668	123304032	-	1	394	ALU-NREF_543	3	123209274	123209274	442	417.86	1	0.992782	1.42651e-07	0.264873	9.999e-05	3.09926e-07	PTPLB	ALU	12.8631
ENSG00000215571_ALU-NREF_2069	ENSG00000215571	13	21893232	21895005	+	5	0	ALU-NREF_2069	13	21894780	21894780	442	442.799	1	4.83185	3.38938e-07	-0.319845	9.999e-05	1.59819e-06	GRK6P1	ALU	0.210553
ENSG00000226025_ALU-REF_849	ENSG00000226025	19	40170015	40177013	+	1	80532	ALU-REF_849	19	40257545	40257545	442	458.284	1	1.01843	7.18987e-09	-0.494996	9.999e-05	3.88155e-09	LGALS17A	ALU	11.7832
ENSG00000226278_ALU-NREF_1234	ENSG00000226278	7	55832491	55840981	+	4	10376	ALU-NREF_1234	7	55851357	55851357	442	440.867	0.999993	3.93534	7.12708e-14	0.429104	9.999e-05	3.01817e-13	PSPHP1	ALU	26.0644
ENSG00000226415_ALU-NREF_64	ENSG00000226415	1	77165475	77166223	+	3	411705	ALU-NREF_64	1	77577928	77577928	442	1322.4	1	5.85355	0.00349613	0.275589	0.0456954	2.54237e-06	TPI1P1	ALU	0.792294
ENSG00000226469_ALU-NREF_2042	ENSG00000226469	12	112364823	112366821	+	1	410310	ALU-NREF_2042	12	112777131	112777131	442	443.975	1	0.99654	0.000355597	0.281595	0.00049995	0.000343715	ADAM1B	ALU	0.0865503
ENSG00000226491_ALU-NREF_258	ENSG00000226491	2	43024366	43025852	-	1	290	ALU-NREF_258	2	43024076	43024076	442	453.525	0.999995	1.00852	1.31545e-15	-0.420412	9.999e-05	5.6919e-16	FTOP1	ALU	0.80894
ENSG00000231443_ALU-NREF_611	ENSG00000231443	3	195664115	195665610	+	3	96159	ALU-NREF_611	3	195761769	195761769	442	443.824	0.999995	3.01966	3.64071e-06	0.431451	9.999e-05	1.0498e-05	AC024937.6	ALU	0.516151
ENSG00000231464_ALU-NREF_611	ENSG00000231464	3	195723610	195725104	+	3	36665	ALU-NREF_611	3	195761769	195761769	442	449.629	1	3.05158	2.4699e-08	0.639411	9.999e-05	5.71529e-08	AC024937.4	ALU	0.0618888
ENSG00000237440_ALU-NREF_2540	ENSG00000237440	19	20718632	20748615	-	1	0	ALU-NREF_2540	19	20745988	20745988	442	454.356	1.00001	1.01611	5.36962e-05	-0.231006	9.999e-05	4.28832e-05	ZNF737	ALU	3.44499
ENSG00000242588_ALU-NREF_1298	ENSG00000242588	7	128171753	128269512	+	4	0	ALU-NREF_1298	7	128209166	128209166	442	455.316	0.999997	3.73141	7.64378e-06	-0.116232	9.999e-05	2.08021e-05	RP11-274B21.1	ALU	6.99412
ENSG00000243679_ALU-NREF_1298	ENSG00000243679	7	128294024	128294776	+	4	-84858	ALU-NREF_1298	7	128209166	128209166	442	438.007	0.999988	3.66169	8.95439e-07	-0.189789	9.999e-05	3.67305e-06	RP11-274B21.3	ALU	6.17184
ENSG00000251595_ALU-REF_156	ENSG00000251595	4	419225	492945	-	4	18185	ALU-REF_156	4	401040	401040	442	448.129	1.00001	3.82838	5.06186e-06	0.260165	9.999e-05	1.66633e-05	ABCA11P	ALU	0.705892
ENSG00000255753_ALU-NREF_1906	ENSG00000255753	12	9466999	9468769	-	3	-402393	ALU-NREF_1906	12	9871162	9871162	442	446.057	0.999995	3.00989	7.46354e-05	-0.224663	9.999e-05	0.000208154	RP11-22B23.2	ALU	0.622319
ENSG00000258493_ALU-REF_741	ENSG00000258493	14	35390072	35390212	+	2	11191	ALU-REF_741	14	35401403	35401403	442	443.295	0.999995	2.00725	5.86456e-05	-0.244379	0.00029997	0.000114813	RP11-73E17.3	ALU	1.88285
ENSG00000259363_ALU-NREF_2360	ENSG00000259363	15	100347229	100417353	+	4	-3905	ALU-NREF_2360	15	100343324	100343324	442	452.51	1.00001	3.53937	1.89568e-10	0.551533	9.999e-05	4.09265e-10	CTD-2054N24.2	ALU	3.89709
ENSG00000261652_ALU-NREF_2308	ENSG00000261652	15	55700747	55800432	+	2	0	ALU-NREF_2308	15	55702249	55702249	442	470.607	1	1.99001	1.2903e-07	0.69777	9.999e-05	1.01028e-07	C15orf65	ALU	0.784845
ENSG00000268088_ALU-REF_849	ENSG00000268088	19	40184566	40186898	+	1	70647	ALU-REF_849	19	40257545	40257545	442	450.525	1	0.997275	0.000647887	-0.23911	0.00089991	0.000572651	AC093063.2	ALU	9.69923

## Sheet: TOP-SNP.pMEI-LCL
gene	Chr_gene	Start_gene	End_gene	strand	variants_tested	dist_Gene	MEI	Chr_MEI	Pos_MEI	Pos_MEI2	rank (0 = best)	Forward nominal P-value	Forward slope	Top variant ? (1 = true)	< P-value threshold ? (1 = True)	Backward nominal P-value	Backward slope	Top variant ? (1 = true)	< P-value threshold ? (1 = True)
ENSG00000100994	20	25228706	25371619	+	1	819355	ALU-NREF_2571	20	26190974	26190974	0	0.00140479	0.158745	1	1	0.00140479	0.158745	1	1
ENSG00000184012	21	42836479	42903043	-	2	433596	ALU-REF_885	21	42402883	42402883	0	0.000990326	0.226482	1	1	0.000990326	0.226482	1	1
ENSG00000183570	21	47063609	47362368	+	1	-21236	ALU-NREF_2628	21	47042373	47042373	0	0.00171155	0.192879	1	1	0.00171155	0.192879	1	1
ENSG00000075234	22	46663859	46689905	+	2	-40808	ALU-NREF_2638	22	46623051	46623051	0	0.00113239	0.30284	1	1	0.00113239	0.30284	1	1
ENSG00000197885	3	23933152	24022109	-	4	-68678	ALU-REF_111	3	24090787	24090787	0	0.000770866	0.189837	1	1	0.000770866	0.189837	1	1
ENSG00000144747	3	69068979	69101484	-	2	198504	ALU-REF_122	3	68870475	68870475	0	0.00116552	-0.113278	1	1	0.00116552	-0.113278	1	1
ENSG00000138670	4	82347548	82965397	-	3	0	L1-REF_31	4	82929301	82929301	0	0.001001	0.203338	1	1	0.001001	0.203338	1	1
ENSG00000162490	1	11751787	11785914	+	1	951661	ALU-NREF_7	1	12737575	12737575	0	0.00164408	-0.262817	1	1	0.00164408	-0.262817	1	1
ENSG00000122507	7	33168857	33645680	+	5	0	ALU-NREF_1206	7	33195329	33195329	0	0.000620543	-0.265973	1	1	0.000620543	-0.265973	1	1
ENSG00000119139	9	71736210	71870124	+	1	0	ALU-REF_547	9	71777927	71777927	0	0.00270255	-0.169731	1	1	0.00270255	-0.169731	1	1
ENSG00000187984	9	95571671	95661890	+	5219	18618	ALU-NREF_1563	9	95680508	95680508	0	2.72548e-07	0.455733	1	1	2.72548e-07	0.455733	1	1
ENSG00000267260	19	37264056	37267980	+	1	-217874	ALU-REF_848	19	37046182	37046182	0	0.00360522	-0.176017	1	1	0.00360522	-0.176017	1	1
ENSG00000144283	2	159313477	159539391	+	4	-30842	ALU-NREF_358	2	159282635	159282635	0	0.000489918	0.252659	1	1	0.000489918	0.252659	1	1
ENSG00000227692	2	187229326	187229855	+	2	985864	ALU-REF_88	2	188215719	188215719	0	0.00135947	0.248498	1	1	0.00135947	0.248498	1	1
ENSG00000172977	11	65479468	65488418	+	3	495920	ALU-NREF_1840	11	65984338	65984338	0	0.000512742	-0.224497	1	1	0.000512742	-0.224497	1	1
ENSG00000090104	1	192544858	192549161	+	1	-282590	L1-NREF_13	1	192262268	192262268	0	0.00316435	0.235188	1	1	0.00316435	0.235188	1	1
ENSG00000256574	10	45798103	45811056	-	1	-263837	ALU-NREF_1661	10	46074893	46074893	0	0.00303402	0.332649	1	1	0.00303402	0.332649	1	1
ENSG00000146085	6	49398074	49430904	-	1	-131025	ALU-NREF_1017	6	49561929	49561929	0	0.00240564	-0.173986	1	1	0.00240564	-0.173986	1	1
ENSG00000244932	3	129100142	129118498	+	2	18171	ALU-NREF_549	3	129136669	129136669	0	0.000598243	-0.320626	1	1	0.000598243	-0.320626	1	1
ENSG00000135677	12	65107226	65153227	-	1	-244080	ALU-NREF_1998	12	65397307	65397307	0	0.00325344	0.229009	1	1	0.00325344	0.229009	1	1
ENSG00000205302	5	122110692	122165803	+	3	108538	ALU-REF_311	5	122274341	122274341	0	0.000731153	0.182609	1	1	0.000731153	0.182609	1	1
ENSG00000167081	9	128509625	128729656	+	1	250520	ALU-NREF_1609	9	128980176	128980176	0	0.00299283	-0.160805	1	1	0.00299283	-0.160805	1	1
ENSG00000124391	16	88705000	88706881	+	2	584508	ALU-NREF_2408	16	89291389	89291389	0	0.000751972	-0.236679	1	1	0.000751972	-0.236679	1	1
ENSG00000163116	4	98105245	99064391	-	4	0	ALU-REF_197	4	98181262	98181262	0	0.000654815	0.331598	1	1	0.000654815	0.331598	1	1
ENSG00000168772	4	105389470	105416058	-	2	644853	ALU-NREF_692	4	104744617	104744617	0	0.00141013	0.157747	1	1	0.00141013	0.157747	1	1
ENSG00000166452	11	8932687	8954553	+	5	-45370	ALU-NREF_1777	11	8887317	8887317	0	0.000263001	0.190273	1	1	0.000263001	0.190273	1	1
ENSG00000170631	8	146155745	146176274	-	1	-77129	SVA-NREF_66	8	146253403	146253403	0	0.00138213	0.338611	1	1	0.00138213	0.338611	1	1
ENSG00000198203	2	108905096	108926371	+	1	-980472	ALU-NREF_314	2	107924624	107924624	0	0.00437855	0.304436	1	1	1.77205e-08	-0.614299	1	1
ENSG00000118260	2	208394462	208490652	+	5	0	ALU-NREF_401	2	208472417	208472417	0	0.000367316	-0.164181	1	1	0.000367316	-0.164181	1	1
ENSG00000144580	2	219433304	219461803	+	1	114806	ALU-NREF_410	2	219576609	219576609	0	0.00170746	-0.115788	1	1	0.00170746	-0.115788	1	1
ENSG00000172794	17	72666718	72743474	+	2	-983182	ALU-NREF_2463	17	71683536	71683536	0	0.00163899	0.287765	1	1	0.00163899	0.287765	1	1
ENSG00000110031	11	58294345	58345693	-	1	331516	ALU-REF_638	11	57962829	57962829	0	0.00281993	0.160537	1	1	0.00281993	0.160537	1	1
ENSG00000180771	11	94800057	94804388	+	2	567199	ALU-NREF_1856	11	95371587	95371587	0	0.00143741	-0.241873	1	1	0.00143741	-0.241873	1	1
ENSG00000166741	11	114128510	114184007	+	1	502170	ALU-NREF_1882	11	114686177	114686177	0	0.00182392	-0.287561	1	1	0.00182392	-0.287561	1	1
ENSG00000011009	1	24117461	24122029	+	1	-136319	ALU-NREF_18	1	23981142	23981142	0	0.00169136	-0.111677	1	1	0.00169136	-0.111677	1	1
ENSG00000189266	1	24285600	24289952	+	1	-304458	ALU-NREF_18	1	23981142	23981142	0	0.00379065	0.16854	1	1	0.00379065	0.16854	1	1
ENSG00000120659	13	43136873	43182149	+	3	-196785	ALU-NREF_2099	13	42940088	42940088	0	0.000829214	0.200374	1	1	0.000829214	0.200374	1	1
ENSG00000150401	13	114110135	114145267	-	2	-736754	ALU-NREF_2190	13	114882021	114882021	0	0.00124195	0.172355	1	1	0.00124195	0.172355	1	1

## Sheet: LCL.caQTL.0.05FDR
Peak_nb	Chr_tr	Start_tr	End_tr	strand	nb_tested	dist.Peak.MEI	MEI	Chr_MEI	Pos_MEI	Pos_MEI2	df	dummy	Beta1	Beta2	P_nominal	slope	P_empirical	P_value	mei
1812	1	27247787	27248585	+	1	555528	ALU-REF_5	1	27804113	27804113	83	85.3668	1.00001	1.00586	0.000114443	-0.0716889	0.00019998	9.18089e-05	ALU
1873	1	27753766	27754353	+	1	49760	ALU-REF_5	1	27804113	27804113	83	85.2533	0.999958	1.01138	8.38125e-07	0.354274	9.999e-05	6.01356e-07	ALU
4160	1	59755729	59756395	+	2	115481	ALU-NREF_45	1	59871876	59871876	83	82.1895	1.00002	2.05859	8.05984e-09	-0.169704	9.999e-05	1.96211e-08	ALU
4172	1	59849883	59850628	+	2	21248	ALU-NREF_45	1	59871876	59871876	83	85.5451	1.00003	2.06294	4.20008e-21	0.652081	9.999e-05	2.16616e-21	ALU
4175	1	59875486	59876466	+	2	-3610	ALU-NREF_45	1	59871876	59871876	83	84.0537	1.00005	2.01202	5.37086e-08	0.254482	9.999e-05	8.88609e-08	ALU
4463	1	65129267	65129944	+	4	925997	ALU-NREF_51	1	66055941	66055941	83	82.773	0.99998	3.85831	2.10227e-05	0.137979	9.999e-05	8.3274e-05	ALU
5504	1	72787644	72789079	+	2	-148624	ALU-NREF_58	1	72639020	72639020	83	82.773	1.00008	2.03699	4.10992e-06	-1.16025	0.00019998	8.62201e-06	ALU
5676	1	74471072	74471707	+	4	0	ALU-NREF_59	1	74471655	74471655	83	83.9402	0.99998	3.98261	4.57322e-07	-0.364847	9.999e-05	1.56775e-06	ALU
5781	1	75197055	75197416	+	5	-4148	L1-NREF_3	1	75192907	75192907	83	82.384	0.999905	4.81025	1.79443e-14	-0.240614	9.999e-05	1.08177e-13	L1
6410	1	79518391	79519126	+	5	62956	ALU-NREF_70	1	79582082	79582082	83	82.7082	1.0001	4.96725	1.44627e-16	0.383296	9.999e-05	8.09095e-16	ALU
7276	1	87258298	87259316	+	2	-517317	L1-REF_4	1	86740981	86740981	83	83.2918	0.999969	2.03946	6.91237e-05	0.195476	0.00029997	0.000136898	L1
10052	1	112936761	112937473	+	4	54536	ALU-NREF_103	1	112992009	112992009	83	82.692	0.999952	3.74765	5.74427e-06	-0.116838	0.00019998	2.24202e-05	ALU
10055	1	112944976	112946276	+	4	45733	ALU-NREF_103	1	112992009	112992009	83	84.7184	0.999931	3.82544	9.76997e-22	-0.604432	9.999e-05	1.42839e-21	ALU
10330	1	117048787	117049110	+	1	29055	ALU-REF_20	1	117078165	117078165	83	81.9787	1	1.00535	2.79821e-13	0.532837	9.999e-05	3.9368e-13	ALU
10347	1	117100854	117101101	+	2	-22689	ALU-REF_20	1	117078165	117078165	83	84.2158	1.00004	2.01703	8.23076e-08	-0.251668	9.999e-05	1.33328e-07	ALU
256697	18	9403788	9404075	+	3	-18396	ALU-REF_823	18	9385392	9385392	83	84.7021	0.999908	2.94885	1.87481e-05	-0.179674	9.999e-05	4.53872e-05	ALU
256698	18	9404364	9405170	+	3	-18972	ALU-REF_823	18	9385392	9385392	83	83.6322	1.00006	2.89148	2.08336e-08	-0.260927	9.999e-05	5.31653e-08	ALU
258409	18	32651526	32652405	+	3	9550	ALU-REF_827	18	32661955	32661955	83	85.8855	1.00008	3.08214	2.01023e-07	0.157037	9.999e-05	3.79648e-07	ALU
259446	18	44439176	44440314	+	4	-56466	ALU-REF_830	18	44382710	44382710	83	83.4215	0.999902	4.00421	3.32625e-05	-0.163155	0.00049995	0.000127274	ALU
259966	18	50906355	50906952	+	4	79600	ALU-NREF_2508	18	50986552	50986552	83	82.8865	1.00004	3.99739	2.51603e-07	0.25385	9.999e-05	1.02435e-06	ALU
260383	18	54751412	54752553	+	2	-45219	ALU-NREF_2510	18	54706193	54706193	83	80.0172	1.00007	1.96624	1.34977e-07	0.157025	9.999e-05	4.45729e-07	ALU
260662	18	57245193	57245800	+	5	12379	ALU-REF_833	18	57258179	57258179	83	83.616	0.999935	5.07748	7.69069e-07	-0.257262	9.999e-05	3.55517e-06	ALU
263076	18	74513806	74514462	+	6	48587	ALU-NREF_2530	18	74563049	74563049	83	84.3617	0.981453	5.82878	6.45269e-07	-0.101673	9.999e-05	3.87481e-06	ALU
263087	18	74539164	74539821	+	6	23228	ALU-NREF_2530	18	74563049	74563049	83	82.9676	0.99112	5.77502	4.71772e-06	-0.123594	9.999e-05	3.01274e-05	ALU
263141	18	74766507	74767440	+	5	2331	ALU-REF_845	18	74769771	74769771	83	81.9463	1	4.78223	1.47668e-06	0.0529553	9.999e-05	8.23705e-06	ALU
263147	18	74779300	74780070	+	5	-9529	ALU-REF_845	18	74769771	74769771	83	84.54	0.999928	4.99704	7.17625e-10	0.146309	9.999e-05	2.49764e-09	ALU
267435	19	57049505	57050591	+	2	-25926	ALU-NREF_2551	19	57023579	57023579	83	83.3566	1.00003	2.00707	1.20215e-05	0.306631	0.00019998	2.30965e-05	ALU
22840	2	3486849	3487577	+	3	-7603	ALU-NREF_230	2	3479246	3479246	83	82.8703	1.00004	2.9389	1.70652e-10	0.858903	9.999e-05	5.17812e-10	ALU
23590	2	9860644	9861345	+	2	27473	ALU-NREF_240	2	9888818	9888818	83	81.7518	1.00001	1.99288	3.5343e-05	0.367306	0.00039996	8.0713e-05	ALU
23737	2	11301014	11301695	+	1	124680	ALU-NREF_241	2	11426375	11426375	83	80.9574	1.00003	0.967298	7.8473e-05	0.163953	9.999e-05	9.30847e-05	ALU
24263	2	15171758	15172546	+	3	-5472	ALU-REF_37	2	15166286	15166286	83	81.3141	0.999906	2.85839	4.56016e-05	0.196227	0.00029997	0.000156048	ALU
24322	2	15518234	15519115	+	3	438	ALU-NREF_244	2	15519553	15519553	83	85.075	0.999951	2.94925	3.66418e-20	-0.490745	9.999e-05	3.69505e-20	ALU
24342	2	15696320	15696887	+	3	-176767	ALU-NREF_244	2	15519553	15519553	83	83.1459	1.00001	2.86899	1.22713e-08	0.286689	9.999e-05	3.41747e-08	ALU
25555	2	26401619	26402702	+	2	71244	ALU-NREF_247	2	26473946	26473946	83	85.9828	0.999929	2.02348	5.85405e-06	-0.216206	9.999e-05	8.04673e-06	ALU
27148	2	43022997	43023571	+	1	505	ALU-NREF_258	2	43024076	43024076	83	82.7082	0.999988	0.997028	6.35461e-08	-0.143823	9.999e-05	6.68446e-08	ALU
27149	2	43023647	43024216	+	1	0	ALU-NREF_258	2	43024076	43024076	83	82.3191	0.999934	0.996629	5.19745e-19	-0.346109	9.999e-05	7.23453e-19	ALU
27283	2	44271226	44271892	+	2	751343	ALU-NREF_262	2	45023235	45023235	83	84.459	0.999991	2.04144	2.76645e-05	-0.218947	0.00019998	4.79691e-05	ALU
27318	2	44823503	44824439	+	2	1411	ALU-NREF_259	2	44825850	44825850	83	83.308	1.00004	2.00302	4.82674e-06	-0.152401	9.999e-05	9.27727e-06	ALU
27319	2	44825843	44826741	+	2	0	ALU-NREF_259	2	44825850	44825850	83	83.9889	0.99991	2.02444	8.47559e-06	-0.17131	9.999e-05	1.51683e-05	ALU
27471	2	46211762	46212586	+	4	-15563	ALU-NREF_263	2	46196199	46196199	83	83.3404	0.999971	3.95663	1.91993e-06	0.285123	9.999e-05	7.23805e-06	ALU
27548	2	46947688	46948412	+	4	-18735	ALU-NREF_264	2	46928953	46928953	83	83.7295	1.00001	4.02138	5.25934e-08	0.261544	9.999e-05	1.84758e-07	ALU
27694	2	48324937	48325325	+	2	-48403	ALU-NREF_266	2	48276534	48276534	83	86.2908	0.999996	2.09594	4.41604e-09	0.475314	9.999e-05	4.57317e-09	ALU
27695	2	48325647	48326494	+	2	-49113	ALU-NREF_266	2	48276534	48276534	83	82.076	1.00007	1.97406	3.9499e-07	0.278359	9.999e-05	9.04361e-07	ALU
28335	2	54799564	54799653	+	2	-106085	ALU-REF_49	2	54693479	54693479	83	83.4539	0.999991	2.02991	5.63066e-06	0.176603	0.00019998	1.07737e-05	ALU
28338	2	54806832	54807595	+	2	-113353	ALU-REF_49	2	54693479	54693479	83	86.3719	1.00008	2.04864	3.88992e-06	0.0870695	9.999e-05	5.0554e-06	ALU
29347	2	63484466	63485131	+	3	294105	ALU-NREF_279	2	63779236	63779236	83	86.1449	1.00008	2.97888	5.54889e-05	-0.250531	0.00029997	0.000119141	ALU
29593	2	65243800	65244852	+	4	88951	ALU-NREF_283	2	65333803	65333803	83	81.2816	0.999894	4.03359	7.62984e-06	0.172521	9.999e-05	3.83221e-05	ALU
30221	2	74123533	74124329	+	2	1164	ALU-NREF_298	2	74125493	74125493	83	83.6971	1.00003	1.99951	2.48669e-05	-0.154659	0.00019998	4.59342e-05	ALU
30727	2	80733196	80734308	+	1	34716	ALU-NREF_304	2	80769024	80769024	83	79.0445	0.999976	0.972955	4.01671e-07	-0.216641	9.999e-05	7.40344e-07	ALU
30730	2	80746466	80747390	+	1	21634	ALU-NREF_304	2	80769024	80769024	83	81.0547	0.999995	0.985068	4.85452e-08	-0.301246	9.999e-05	6.86975e-08	ALU
30732	2	80752107	80752851	+	1	16173	ALU-NREF_304	2	80769024	80769024	83	81.1357	0.999972	1.00616	2.08896e-12	-0.46899	9.999e-05	3.71542e-12	ALU
30733	2	80754224	80754702	+	1	14322	ALU-NREF_304	2	80769024	80769024	83	81.849	1.00006	0.994103	2.93383e-08	-0.361478	9.999e-05	3.63462e-08	ALU
30734	2	80756664	80758043	+	1	10981	ALU-NREF_304	2	80769024	80769024	83	82.0922	1.00007	1.00797	2.02848e-09	-0.363707	9.999e-05	2.50118e-09	ALU
30735	2	80758468	80758749	+	1	10275	ALU-NREF_304	2	80769024	80769024	83	83.9078	1.00003	0.986059	4.19944e-11	-0.456655	9.999e-05	3.2398e-11	ALU
31239	2	88564847	88565595	+	3	35222	ALU-REF_63	2	88600817	88600817	83	82.5461	0.999924	3.06059	1.01239e-09	0.383525	9.999e-05	3.44743e-09	ALU
31290	2	89028447	89029353	+	3	0	L1-REF_10	2	89029229	89029229	83	81.0061	0.999972	2.96646	8.10129e-07	-0.346804	9.999e-05	3.26267e-06	L1
31757	2	97866350	97867074	+	1	715083	ALU-NREF_309	2	98582157	98582157	83	84.0537	0.999987	1.0083	4.84043e-08	0.249551	9.999e-05	4.01236e-08	ALU
31760	2	98205968	98207533	+	1	374624	ALU-NREF_309	2	98582157	98582157	83	81.0223	0.999942	1.0014	3.81894e-05	-0.0778274	0.00029997	4.74071e-05	ALU
31779	2	98384591	98385647	+	1	196510	ALU-NREF_309	2	98582157	98582157	83	84.9129	1.00002	1.00508	3.89544e-08	0.239073	9.999e-05	2.72816e-08	ALU
31899	2	99757350	99758379	+	1	-4385	ALU-REF_64	2	99752965	99752965	83	84.2807	1.00003	1.01375	1.07608e-06	-0.052656	9.999e-05	9.00145e-07	ALU
31925	2	100106306	100107227	+	1	-353341	ALU-REF_64	2	99752965	99752965	83	82.5299	0.99997	1.01901	9.54432e-06	-0.0554816	9.999e-05	1.03148e-05	ALU
32832	2	112591572	112592363	+	3	-144136	ALU-NREF_318	2	112447436	112447436	83	84.0051	1	3.00129	4.01025e-09	0.368092	9.999e-05	9.69189e-09	ALU
33288	2	118905464	118906220	+	3	0	ALU-REF_69	2	118906130	118906130	83	81.8652	1.00001	3.01392	1.90775e-13	-0.307045	9.999e-05	8.39402e-13	ALU
33289	2	118906469	118906653	+	3	-339	ALU-REF_69	2	118906130	118906130	83	82.8379	0.999987	2.9588	2.34143e-10	-0.436304	9.999e-05	7.2154e-10	ALU
33290	2	118908440	118909907	+	3	-2310	ALU-REF_69	2	118906130	118906130	83	83.616	0.999927	3.03527	2.7367e-05	-0.133857	0.00019998	7.75765e-05	ALU
35256	2	139379983	139380702	+	2	86	ALU-NREF_336	2	139380788	139380788	83	82.2543	0.999941	1.98667	4.42842e-08	-0.217731	9.999e-05	1.01256e-07	ALU
267719	20	2371415	2372170	+	5	0	ALU-NREF_2553	20	2371733	2371733	83	83.3242	1.00004	4.92692	3.33261e-07	-0.364354	9.999e-05	1.55629e-06	ALU
267759	20	2964487	2965402	+	4	-100485	ALU-REF_851	20	2864002	2864002	83	80.2928	1.00004	3.8192	4.77631e-10	-0.26746	9.999e-05	3.49748e-09	ALU
269089	20	19055524	19056316	+	2	5101	ALU-REF_859	20	19061417	19061417	83	85.4965	0.999921	2.04595	3.83676e-06	0.159091	9.999e-05	5.61132e-06	ALU
269325	20	22709602	22711359	+	2	-3851	ALU-NREF_2570	20	22705751	22705751	83	83.6971	1.00004	1.95086	1.54717e-05	0.167309	9.999e-05	2.77735e-05	ALU
270156	20	34644653	34645325	+	2	-186087	ALU-NREF_2579	20	34458566	34458566	83	83.7781	0.999994	2.03347	2.72738e-07	0.480044	9.999e-05	4.87511e-07	ALU
270447	20	38305490	38306046	+	2	31587	ALU-REF_867	20	38337633	38337633	83	85.0912	0.99999	1.99649	1.16609e-08	-0.332674	9.999e-05	1.52353e-08	ALU
273298	21	26327596	26328452	+	3	25785	ALU-NREF_2605	21	26354237	26354237	83	84.2969	0.999987	3.07377	9.13489e-06	0.143014	9.999e-05	2.3886e-05	ALU
273369	21	26823391	26824388	+	3	744	L1-REF_96	21	26825132	26825132	83	81.6869	0.999953	3.01196	1.19412e-12	0.372756	9.999e-05	5.42311e-12	L1
274854	21	47051729	47052971	+	1	-9356	ALU-NREF_2628	21	47042373	47042373	83	80.0496	0.999953	0.989026	7.20486e-07	0.299626	9.999e-05	1.12501e-06	ALU
274864	21	47311591	47312700	+	1	-269218	ALU-NREF_2628	21	47042373	47042373	83	80.1307	0.999972	0.993963	8.29053e-07	0.281982	9.999e-05	1.27842e-06	ALU
275009	22	18283123	18284040	+	3	0	ALU-REF_889	22	18283897	18283897	83	83.0973	0.999947	3.00523	1.11739e-09	0.127608	9.999e-05	3.28701e-09	ALU
276585	22	41801577	41802106	+	1	338373	ALU-REF_890	22	42140479	42140479	83	81.4924	1.00005	0.991671	5.48821e-05	0.219584	9.999e-05	6.36436e-05	ALU
276616	22	42148015	42148945	+	1	-7536	ALU-REF_890	22	42140479	42140479	83	83.7133	1.00003	1.01039	9.62548e-06	0.162505	9.999e-05	8.89804e-06	ALU
277039	22	50317025	50317450	+	1	-43647	ALU-NREF_2641	22	50273378	50273378	83	85.7234	0.999956	1.01597	0.000145936	0.42806	0.00089991	0.000115218	ALU
50450	3	2961674	2962319	+	3	0	ALU-NREF_434	3	2962004	2962004	83	82.2381	0.999986	3.0405	1.22097e-13	-0.924995	9.999e-05	4.80812e-13	ALU
50810	3	5049508	5049993	+	1	-844347	ALU-NREF_435	3	4205161	4205161	83	84.6211	1.00004	1.0239	8.40347e-05	0.120601	9.999e-05	7.32457e-05	ALU
51751	3	12828780	12829656	+	1	-10312	ALU-NREF_449	3	12818468	12818468	83	81.8004	0.999926	0.997958	1.03331e-11	0.384627	9.999e-05	1.45622e-11	ALU
52107	3	16183639	16184397	+	1	13137	ALU-NREF_451	3	16197534	16197534	83	82.1408	1.00001	0.995386	5.77079e-05	-0.253473	9.999e-05	6.27762e-05	ALU
53372	3	23757916	23758683	+	3	5375	ALU-REF_110	3	23764058	23764058	83	81.9625	1.00006	2.88877	3.45432e-07	-0.314415	9.999e-05	1.18088e-06	ALU
56063	3	45594864	45595570	+	3	-52202	ALU-NREF_485	3	45542662	45542662	83	83.1459	0.999994	2.98091	1.54486e-07	0.170649	9.999e-05	4.49102e-07	ALU
56349	3	48347602	48348939	+	1	23387	ALU-NREF_488	3	48372326	48372326	83	82.9838	0.999989	1.0042	1.48601e-12	0.33161	9.999e-05	1.50022e-12	ALU
56647	3	52287111	52287954	+	2	421884	ALU-REF_119	3	52709838	52709838	83	84.4104	1.00004	2.00794	8.82534e-09	-0.104947	9.999e-05	1.32402e-08	ALU
56677	3	52566473	52568161	+	3	141677	ALU-REF_119	3	52709838	52709838	83	83.2756	0.999951	2.91418	2.40669e-08	0.0838489	9.999e-05	6.65322e-08	ALU
56683	3	52730699	52731877	+	3	-20861	ALU-REF_119	3	52709838	52709838	83	84.3941	0.999973	3.00032	1.03993e-06	0.135446	9.999e-05	2.53178e-06	ALU
57669	3	67465715	67466696	+	1	-514062	ALU-NREF_498	3	66951653	66951653	83	82.9838	1.00006	0.984433	9.05166e-05	-0.225086	0.00039996	8.92016e-05	ALU
59012	3	82621729	82622274	+	2	-6143	SVA-NREF_15	3	82615586	82615586	83	84.0213	0.999969	2.00669	4.74766e-09	0.669667	9.999e-05	7.66529e-09	SVA
59575	3	88482642	88483556	+	3	-4480	ALU-NREF_509	3	88478162	88478162	83	82.157	1.00006	2.93522	2.03325e-06	0.180429	9.999e-05	6.72377e-06	ALU
59881	3	95106107	95106939	+	2	9254	ALU-REF_129	3	95116193	95116193	83	83.0811	0.999984	1.97425	5.18636e-11	-0.4083	9.999e-05	1.00237e-10	ALU
59884	3	95126443	95127751	+	2	-10250	ALU-REF_129	3	95116193	95116193	83	83.1621	1.00006	1.95679	4.54521e-05	-0.132186	9.999e-05	8.73721e-05	ALU
59999	3	96422337	96423436	+	1	-547820	ALU-NREF_510	3	95874517	95874517	83	82.5299	1.00004	0.98544	3.78286e-05	-0.137819	0.00019998	3.92088e-05	ALU
60336	3	98730754	98731516	+	2	-3978	ALU-NREF_511	3	98726776	98726776	83	83.6971	1.00008	2.02031	5.88731e-06	-0.142117	9.999e-05	1.08538e-05	ALU
60587	3	100449219	100449960	+	3	-38659	ALU-NREF_513	3	100410560	100410560	83	84.1023	0.999971	3.07109	4.25974e-05	-0.191345	0.00039996	0.000116296	ALU
60672	3	101334213	101335432	+	2	96954	ALU-NREF_514	3	101432386	101432386	83	84.2482	1.00003	2.0249	2.43895e-06	0.249625	9.999e-05	4.1445e-06	ALU
61364	3	106284996	106285711	+	2	3490	ALU-NREF_526	3	106289201	106289201	83	83.4053	1.00007	2.01006	7.61326e-09	-0.186771	9.999e-05	1.40473e-08	ALU
73927	4	10728599	10729629	+	1	-6306	ALU-NREF_617	4	10722293	10722293	83	83.7295	1.00005	0.998649	4.28068e-06	0.165001	9.999e-05	3.87523e-06	ALU
75236	4	25486614	25487160	+	2	9991	ALU-REF_160	4	25497151	25497151	83	84.6049	0.999915	1.99868	5.68945e-05	-0.239484	9.999e-05	9.63679e-05	ALU
76175	4	36321702	36322669	+	3	2536	ALU-NREF_632	4	36325205	36325205	83	83.9727	1.00005	3.05331	4.32891e-06	0.117346	9.999e-05	1.16018e-05	ALU
76556	4	38964991	38966810	+	1	64267	ALU-REF_166	4	39031077	39031077	83	82.6271	0.999979	0.997773	6.6643e-05	0.107389	0.00019998	6.90822e-05	ALU
76566	4	39038307	39039490	+	1	-7230	ALU-REF_166	4	39031077	39031077	83	81.4924	0.999969	0.978782	6.91062e-11	0.417354	9.999e-05	1.00721e-10	ALU
76900	4	42076244	42076876	+	2	11180	ALU-NREF_637	4	42088056	42088056	83	82.8055	0.999956	2.01091	3.72179e-05	-0.257722	9.999e-05	7.64706e-05	ALU
77447	4	47012772	47013687	+	2	-4983	L1-NREF_62	4	47007789	47007789	83	83.924	1.00002	2.03389	1.29806e-14	-0.3122	9.999e-05	1.88216e-14	L1
77449	4	47033493	47034244	+	2	-25704	L1-NREF_62	4	47007789	47007789	83	81.1844	0.999975	1.93341	2.85498e-05	-0.148416	9.999e-05	6.76226e-05	L1
77450	4	47034359	47035121	+	2	-26570	L1-NREF_62	4	47007789	47007789	83	82.9027	0.999915	1.9862	2.29624e-07	-0.124327	9.999e-05	4.64166e-07	L1
77516	4	47495276	47496420	+	2	109	ALU-NREF_638	4	47496529	47496529	83	83.3404	0.999998	2.00635	2.47099e-07	-0.111426	9.999e-05	4.6838e-07	ALU
78250	4	56411874	56412498	+	4	-39912	ALU-NREF_640	4	56371962	56371962	83	84.4752	1.00003	4.03985	2.21764e-05	-0.0348744	0.00019998	7.5643e-05	ALU
78843	4	64440569	64442379	+	3	154	ALU-REF_173	4	64442533	64442533	83	83.0162	1.00005	2.93582	3.18883e-05	0.136592	9.999e-05	9.34022e-05	ALU
79993	4	72773362	72774063	+	5	11638	ALU-REF_178	4	72785701	72785701	83	82.8865	0.999929	4.28162	1.38617e-06	-0.27418	9.999e-05	6.04008e-06	ALU
80939	4	80926894	80927444	+	3	-38847	L1-REF_30	4	80888047	80888047	83	84.2482	1.00009	3.09683	5.34474e-07	-0.458018	9.999e-05	1.3573e-06	L1
80990	4	81150598	81151287	+	3	-13906	ALU-NREF_676	4	81136692	81136692	83	86.923	1.00001	3.17502	3.47256e-05	-0.556174	0.00079992	7.18155e-05	ALU
81201	4	83319033	83319939	+	4	20757	ALU-NREF_678	4	83340696	83340696	83	82.6434	1.00011	4.01028	1.04932e-05	-0.24884	9.999e-05	4.39219e-05	ALU
81286	4	84142613	84143708	+	2	78001	ALU-REF_180	4	84221709	84221709	83	85.0426	0.999948	2.04829	2.22407e-05	0.114597	9.999e-05	3.60775e-05	ALU
81303	4	84193830	84194571	+	2	27138	ALU-REF_180	4	84221709	84221709	83	85.1885	0.999919	2.03924	2.71925e-06	0.0746364	9.999e-05	4.09604e-06	ALU
81304	4	84197346	84198310	+	2	23399	ALU-REF_180	4	84221709	84221709	83	81.3465	0.999933	1.97442	3.94451e-05	0.0618971	9.999e-05	9.31561e-05	ALU
83009	4	97442168	97443633	+	3	737629	ALU-REF_197	4	98181262	98181262	83	86.842	1.00004	2.54132	6.62909e-05	0.174787	0.00029997	0.000113894	ALU
83497	4	101105543	101106503	+	3	-364674	ALU-NREF_689	4	100740869	100740869	83	84.1996	0.999919	3.00405	5.65295e-05	0.205122	0.00059994	0.000150056	ALU
83604	4	101960353	101960998	+	1	80751	ALU-NREF_690	4	102041749	102041749	83	82.9027	1.00005	1.02187	6.14862e-05	-0.630993	0.00019998	6.34323e-05	ALU
83891	4	103730300	103730854	+	4	142248	L1-REF_35	4	103873102	103873102	83	83.3891	1.00011	4.03148	8.90846e-08	-0.320216	9.999e-05	3.34447e-07	L1
97320	5	262223	262803	+	1	-94604	ALU-NREF_783	5	167619	167619	83	84.1672	1.00002	0.976498	0.000145197	-0.332694	0.00109989	0.000127198	ALU
97691	5	6228434	6229186	+	7	-10336	ALU-NREF_792	5	6218098	6218098	83	83.1621	0.986722	6.78251	3.10708e-13	0.66913	9.999e-05	2.87088e-12	ALU
97692	5	6229546	6230232	+	7	-11448	ALU-NREF_792	5	6218098	6218098	83	83.0648	1.00944	6.71106	6.31684e-09	0.338234	9.999e-05	3.55034e-08	ALU
98188	5	10590679	10591402	+	2	43592	ALU-NREF_797	5	10634994	10634994	83	82.076	0.999992	2.00538	7.94845e-06	-0.189846	9.999e-05	1.79174e-05	ALU
98203	5	10640220	10641274	+	2	-5226	ALU-NREF_797	5	10634994	10634994	83	81.5896	1.00004	1.99691	5.49349e-15	-0.282135	9.999e-05	1.86149e-14	ALU
98205	5	10644438	10644711	+	2	-9444	ALU-NREF_797	5	10634994	10634994	83	81.0223	0.999909	1.97853	1.81951e-05	-0.207831	0.00019998	4.54052e-05	ALU
98206	5	10645060	10646072	+	2	-10066	ALU-NREF_797	5	10634994	10634994	83	84.4428	0.999982	2.04341	5.06092e-06	-0.138887	9.999e-05	8.5542e-06	ALU
98968	5	17519593	17520660	+	3	191962	ALU-NREF_803	5	17712622	17712622	83	83.9078	0.999996	3.02175	5.54705e-05	0.326359	9.999e-05	0.000152524	ALU
99563	5	23508940	23509734	+	7	943106	ALU-REF_253	5	24452840	24452840	83	81.9949	0.972782	5.75275	7.70912e-06	-0.259641	0.00029997	6.65484e-05	ALU
99662	5	25190304	25191192	+	4	125006	ALU-REF_255	5	25316198	25316198	83	85.6586	1.00003	2.94287	1.00935e-05	-0.393014	9.999e-05	2.13772e-05	ALU
100443	5	35602391	35603075	+	3	11099	ALU-REF_259	5	35614174	35614174	83	81.6869	1.00007	2.89797	5.0819e-11	0.471785	9.999e-05	2.0886e-10	ALU
101120	5	42628836	42629316	+	3	36980	ALU-NREF_825	5	42666296	42666296	83	88.5441	0.999982	3.09652	3.28643e-05	-0.81247	0.00059994	5.53611e-05	ALU
101243	5	43363076	43364241	+	4	177564	ALU-NREF_826	5	43541805	43541805	83	85.9828	0.999943	4.04273	1.85757e-08	0.265511	9.999e-05	4.17271e-08	ALU
102062	5	54964061	54964663	+	4	-98261	ALU-NREF_839	5	54865800	54865800	83	82.7244	1.0001	3.89504	5.24937e-08	-0.339483	9.999e-05	2.14829e-07	ALU
102652	5	61592740	61593305	+	3	263813	ALU-NREF_854	5	61857118	61857118	83	86.3719	1.00003	2.81834	9.40642e-07	0.33409	9.999e-05	1.59142e-06	ALU
102684	5	61797723	61798950	+	4	58168	ALU-NREF_854	5	61857118	61857118	83	87.2148	1.00007	3.83864	5.70853e-09	-0.248679	9.999e-05	8.98462e-09	ALU
102865	5	63457123	63458014	+	3	-26407	ALU-NREF_856	5	63430716	63430716	83	80.8926	1.00003	2.98061	1.27127e-05	-0.24184	0.00019998	4.88879e-05	ALU
102866	5	63461259	63462428	+	3	-30543	ALU-NREF_856	5	63430716	63430716	83	81.9625	0.999957	3.03888	4.68187e-06	-0.272282	0.00019998	1.63347e-05	ALU
102868	5	63476406	63477564	+	3	-45690	ALU-NREF_856	5	63430716	63430716	83	83.1945	1	2.99483	9.57943e-06	-0.245092	9.999e-05	2.80019e-05	ALU
102872	5	63484570	63485132	+	3	-53854	ALU-NREF_856	5	63430716	63430716	83	81.8004	0.999986	2.9198	2.08617e-06	-0.312145	9.999e-05	7.22431e-06	ALU
102873	5	63486334	63487226	+	3	-55618	ALU-NREF_856	5	63430716	63430716	83	84.4428	0.999984	3.03921	6.43522e-08	-0.426797	9.999e-05	1.50287e-07	ALU
102875	5	63494823	63495727	+	3	-64107	ALU-NREF_856	5	63430716	63430716	83	81.5896	0.999915	2.998	2.02748e-05	-0.244694	0.00019998	7.16086e-05	ALU
102979	5	64275168	64275909	+	2	10146	ALU-REF_264	5	64286055	64286055	83	83.2432	1.00009	2.00848	2.19512e-07	-0.198906	9.999e-05	4.2264e-07	ALU
103902	5	78277005	78277608	+	7	-256	ALU-REF_276	5	78276749	78276749	83	83.4377	0.993518	6.29539	3.96246e-06	-0.14009	0.00019998	2.52567e-05	ALU
103918	5	78557660	78558118	+	7	-114776	ALU-NREF_865	5	78442884	78442884	83	82.9027	0.978588	6.22966	1.62397e-05	-0.386891	0.00019998	0.000125489	ALU
104004	5	79950244	79951206	+	2	88166	ALU-REF_279	5	80039372	80039372	83	82.8865	1.00008	2.00163	1.15501e-06	0.0523073	9.999e-05	2.34894e-06	ALU
104812	5	86399318	86399965	+	2	-26623	ALU-NREF_875	5	86372695	86372695	83	81.9301	0.999944	1.95584	6.43732e-11	-0.353011	9.999e-05	1.67288e-10	ALU
105053	5	88032256	88032841	+	3	-243	ALU-REF_289	5	88032013	88032013	83	86.1611	0.999979	2.87481	2.51331e-11	-0.196828	9.999e-05	3.02627e-11	ALU
105059	5	88044854	88045513	+	3	-12841	ALU-REF_289	5	88032013	88032013	83	82.5461	0.999944	2.74229	1.22285e-06	-0.169459	9.999e-05	3.58947e-06	ALU
105089	5	88114203	88115853	+	3	-82190	ALU-REF_289	5	88032013	88032013	83	84.4104	0.999941	2.79088	4.88559e-06	0.118528	0.00019998	1.13255e-05	ALU
105308	5	89864700	89865330	+	3	-4278	ALU-REF_291	5	89860422	89860422	83	84.1186	0.999907	2.98023	1.0963e-06	-0.303183	9.999e-05	2.76741e-06	ALU
106952	5	99992431	99993379	+	4	-68897	ALU-REF_297	5	99923534	99923534	83	85.918	0.999958	3.96107	3.24519e-06	0.137005	9.999e-05	8.62809e-06	ALU
107350	5	102082905	102083954	+	1	79401	ALU-REF_299	5	102163355	102163355	83	82.2543	0.999958	1.00716	3.53596e-06	-0.253781	9.999e-05	3.94321e-06	ALU
107458	5	102596568	102597140	+	2	-433213	ALU-REF_299	5	102163355	102163355	83	84.7994	1.00007	2.02353	9.10161e-05	-0.114684	0.00029997	0.000154234	ALU
118205	6	6088698	6089203	+	3	-19860	ALU-REF_329	6	6068838	6068838	83	83.0324	0.999978	3.00386	4.33761e-06	-0.332646	9.999e-05	1.29765e-05	ALU
118442	6	8030976	8031698	+	3	-313608	ALU-REF_331	6	7717368	7717368	83	85.9018	0.999963	3.02029	1.18436e-05	-0.485699	9.999e-05	2.51355e-05	ALU
118460	6	8219504	8220104	+	4	7820	ALU-REF_332	6	8227924	8227924	83	83.9402	1.00004	4.05549	1.28285e-05	0.116796	0.00019998	4.64191e-05	ALU
119058	6	13478646	13479363	+	5	-19050	ALU-NREF_955	6	13459596	13459596	83	84.7994	0.999956	5.01831	4.11707e-10	-0.228671	9.999e-05	1.33703e-09	ALU
119515	6	17015314	17016642	+	4	-64358	L1-NREF_127	6	16950956	16950956	83	83.5188	0.999929	3.91024	2.79714e-06	0.255982	9.999e-05	1.01872e-05	L1
119526	6	17471884	17472381	+	6	0	ALU-REF_341	6	17472270	17472270	83	82.4002	1.0001	5.71905	2.86353e-09	-0.411906	9.999e-05	1.86458e-08	ALU
119610	6	18327570	18328378	+	8	18021	ALU-NREF_966	6	18346399	18346399	83	81.8166	1.0292	7.88788	3.22607e-10	0.569332	9.999e-05	1.90437e-09	ALU
119612	6	18330652	18331473	+	8	14926	ALU-NREF_966	6	18346399	18346399	83	83.5836	0.997297	7.85491	1.65352e-06	0.206718	9.999e-05	1.23196e-05	ALU
119618	6	18354418	18355026	+	9	-8019	ALU-NREF_966	6	18346399	18346399	83	82.7244	0.987935	8.58334	7.8966e-08	0.417604	9.999e-05	8.48694e-07	ALU
119619	6	18359437	18360226	+	9	-13038	ALU-NREF_966	6	18346399	18346399	83	82.3354	0.997802	8.63039	1.59732e-07	-0.176897	9.999e-05	1.59305e-06	ALU
119750	6	20169012	20169561	+	5	0	ALU-NREF_975	6	20169134	20169134	83	82.8055	1	4.89479	4.84803e-06	-0.320731	9.999e-05	2.43473e-05	ALU
120464	6	26923816	26925023	+	2	37151	ALU-NREF_980	6	26962174	26962174	83	82.2381	1.00008	2.00954	1.40651e-07	-0.110794	9.999e-05	3.22253e-07	ALU
120624	6	28410900	28411603	+	3	-220704	ALU-REF_349	6	28190196	28190196	83	85.9342	1.00009	3.04822	8.81689e-06	-0.153902	9.999e-05	1.8596e-05	ALU
121795	6	40200284	40200972	+	5	-29989	ALU-NREF_1006	6	40170295	40170295	83	84.0699	1.00009	5.08233	1.86941e-06	-0.353487	0.00019998	8.14143e-06	ALU
122226	6	44900383	44901597	+	2	358882	ALU-NREF_1013	6	45260479	45260479	83	82.384	1.00005	1.97706	2.96609e-05	-0.309955	9.999e-05	6.27643e-05	ALU
123150	6	53599649	53600254	+	2	48504	ALU-NREF_1021	6	53648758	53648758	83	87.9119	1.00006	2.06594	1.58194e-07	0.271238	9.999e-05	1.40218e-07	ALU
123151	6	53600548	53601133	+	2	47625	ALU-NREF_1021	6	53648758	53648758	83	83.4377	1.00004	1.98269	1.37893e-10	0.348989	9.999e-05	2.44291e-10	ALU
123573	6	56622402	56623818	+	3	78904	ALU-NREF_1024	6	56702722	56702722	83	83.3729	1.0001	3.02967	3.15193e-12	0.422592	9.999e-05	8.51668e-12	ALU
123574	6	56624314	56624750	+	3	77972	ALU-NREF_1024	6	56702722	56702722	83	84.1672	0.999903	3.08041	1.57165e-06	0.206069	9.999e-05	4.0911e-06	ALU
123579	6	56637500	56638189	+	3	64533	ALU-NREF_1024	6	56702722	56702722	83	82.5137	0.999951	2.99624	2.84482e-10	-0.221669	9.999e-05	9.62079e-10	ALU
123584	6	56658861	56659655	+	3	43067	ALU-NREF_1024	6	56702722	56702722	83	81.7842	1.00007	2.95997	4.52028e-05	0.143062	9.999e-05	0.000152168	ALU
124397	6	64964818	64965345	+	2	-128576	ALU-NREF_1031	6	64836242	64836242	83	85.0912	1.00006	1.92146	2.34367e-07	-0.244458	9.999e-05	3.1695e-07	ALU
124401	6	64971602	64972008	+	2	-135360	ALU-NREF_1031	6	64836242	64836242	83	84.6049	0.99996	1.91473	1.47723e-07	0.293371	9.999e-05	2.14416e-07	ALU
124412	6	64999778	65001099	+	3	-163536	ALU-NREF_1031	6	64836242	64836242	83	83.227	0.999984	2.89696	1.63159e-07	0.245732	9.999e-05	4.54693e-07	ALU
124756	6	69282328	69283237	+	5	-83583	L1-NREF_133	6	69198745	69198745	83	82.2543	1.00011	4.80078	5.70543e-07	0.298924	9.999e-05	3.0752e-06	L1
127138	6	86010866	86011394	+	4	14959	ALU-REF_370	6	86026353	86026353	83	82.9352	1.00004	3.95146	5.33743e-07	-0.407908	9.999e-05	2.12961e-06	ALU
127168	6	86159057	86160365	+	4	-14758	ALU-REF_371	6	86144299	86144299	83	82.9676	0.999979	3.89912	1.5166e-18	0.317283	9.999e-05	6.00998e-18	ALU
127169	6	86162957	86163734	+	4	-18658	ALU-REF_371	6	86144299	86144299	83	84.5076	1.00003	3.99551	6.03815e-08	0.273765	9.999e-05	1.82849e-07	ALU
127170	6	86165314	86165786	+	4	-21015	ALU-REF_371	6	86144299	86144299	83	83.3729	1.00008	3.90732	4.81229e-06	0.250455	9.999e-05	1.78818e-05	ALU
183730	10	1282270	1283686	+	2	8421	ALU-NREF_1613	10	1292107	1292107	83	82.5137	0.999995	1.9983	2.95216e-15	0.705288	9.999e-05	7.1093e-15	ALU
185784	10	23811966	23812525	+	2	-36271	ALU-NREF_1636	10	23775695	23775695	83	83.9889	1.00002	1.97972	1.92169e-06	-0.238388	0.00019998	3.30216e-06	ALU
186041	10	26766945	26767559	+	5	383	ALU-REF_580	10	26767942	26767942	83	84.7832	1.00004	4.98031	9.48519e-06	-0.194312	9.999e-05	3.78294e-05	ALU
186241	10	29096795	29097712	+	2	4829	ALU-NREF_1643	10	29102541	29102541	83	89.4195	0.999933	1.8855	1.9727e-12	-0.648064	9.999e-05	5.24e-13	ALU
186867	10	35597183	35598511	+	4	-3976	ALU-REF_584	10	35593207	35593207	83	83.843	0.999907	3.98048	1.67523e-06	-0.170786	9.999e-05	5.90989e-06	ALU
187774	10	50284592	50285453	+	1	-6591	ALU-REF_586	10	50278001	50278001	83	83.8105	1.00003	1.00691	5.44111e-05	0.157655	0.00029997	5.03344e-05	ALU
187778	10	50332029	50333031	+	1	-54028	ALU-REF_586	10	50278001	50278001	83	83.8916	1.00004	1.00051	4.18754e-05	-0.214105	9.999e-05	3.80621e-05	ALU
187940	10	52239750	52240813	+	2	-942	ALU-NREF_1663	10	52238808	52238808	83	82.4326	0.999936	2.03282	1.2739e-05	0.240683	9.999e-05	2.77553e-05	ALU
188371	10	56194236	56195139	+	4	-12975	ALU-NREF_1673	10	56181261	56181261	83	81.8652	1.00007	3.87486	4.43874e-06	-0.380298	0.00019998	1.99924e-05	ALU
190035	10	70384959	70385896	+	5	-112862	ALU-REF_593	10	70272097	70272097	83	83.8268	0.99995	5.04332	1.64537e-05	0.234332	0.00029997	7.53039e-05	ALU
192643	10	98549123	98549798	+	3	-11975	ALU-REF_602	10	98537148	98537148	83	84.232	0.999926	3.06923	8.52043e-06	-0.299295	9.999e-05	2.24197e-05	ALU
141495	7	18217296	18218350	+	2	104253	ALU-NREF_1199	7	18322603	18322603	83	85.6586	0.999984	2.0318	6.58644e-05	-0.104631	0.00019998	0.000102079	ALU
141518	7	18343209	18344024	+	2	-20606	ALU-NREF_1199	7	18322603	18322603	83	82.5299	0.999921	1.99091	6.95203e-06	0.226251	0.00019998	1.47127e-05	ALU
142128	7	22862024	22862827	+	2	-8532	ALU-NREF_1200	7	22853492	22853492	83	80.5846	0.999985	1.98047	1.93468e-05	-0.0666093	9.999e-05	5.07389e-05	ALU
142187	7	23369154	23369819	+	2	295866	ALU-NREF_1201	7	23665685	23665685	83	83.0811	0.999911	2.01578	4.38462e-05	-0.221893	0.00019998	8.76959e-05	ALU
142223	7	23633387	23633595	+	2	32090	ALU-NREF_1201	7	23665685	23665685	83	81.7842	0.999924	2.01985	5.52498e-12	0.217285	9.999e-05	1.59775e-11	ALU
142224	7	23634601	23635309	+	2	30376	ALU-NREF_1201	7	23665685	23665685	83	81.7355	1.00002	1.9875	1.00264e-27	0.456112	9.999e-05	4.99069e-27	ALU
142226	7	23640629	23641094	+	2	24591	ALU-NREF_1201	7	23665685	23665685	83	84.3455	1.00002	2.01395	6.68284e-12	0.386129	9.999e-05	9.09173e-12	ALU
142227	7	23642989	23643960	+	2	21725	ALU-NREF_1201	7	23665685	23665685	83	83.924	1.00002	2.03234	1.10196e-09	0.27356	9.999e-05	1.80869e-09	ALU
142335	7	24831922	24832590	+	3	-153996	ALU-REF_408	7	24677926	24677926	83	84.2482	0.999936	2.82754	6.12843e-05	0.254349	0.00049995	0.000152502	ALU
142974	7	32678067	32678898	+	3	152343	ALU-NREF_1204	7	32831241	32831241	83	84.1348	1.00005	3.04731	2.45732e-05	0.167343	0.00039996	6.58092e-05	ALU
142985	7	32767558	32768738	+	3	62503	ALU-NREF_1204	7	32831241	32831241	83	82.6109	0.999914	2.96373	1.42586e-08	0.368301	9.999e-05	4.57558e-08	ALU
142986	7	32772091	32772811	+	3	58430	ALU-NREF_1204	7	32831241	32831241	83	82.8703	0.999927	2.97648	4.09212e-07	0.513246	9.999e-05	1.24498e-06	ALU
142987	7	32777928	32778874	+	3	52367	ALU-NREF_1204	7	32831241	32831241	83	83.0648	1.00005	2.95377	1.74085e-05	0.438484	9.999e-05	5.10047e-05	ALU
142988	7	32781375	32782022	+	3	49219	ALU-NREF_1204	7	32831241	32831241	83	86.226	0.999983	3.10979	4.95808e-05	0.382168	0.00039996	0.000109843	ALU
143049	7	33183506	33184444	+	3	10885	ALU-NREF_1206	7	33195329	33195329	83	84.7508	0.99996	3.0223	9.32145e-12	-0.360269	9.999e-05	1.70535e-11	ALU
143464	7	37684832	37685728	+	3	150923	ALU-NREF_1210	7	37836651	37836651	83	81.5086	0.999926	2.98814	3.66699e-05	-0.221319	0.00019998	0.000128957	ALU
143497	7	37864474	37865269	+	4	-27823	ALU-NREF_1210	7	37836651	37836651	83	82.8703	1.00004	3.95147	1.85648e-09	-0.222449	9.999e-05	7.54695e-09	ALU
143528	7	38209356	38209914	+	4	-143	ALU-NREF_1212	7	38209213	38209213	83	81.6221	1.00005	3.97194	1.3479e-05	-0.167789	0.00019998	6.31659e-05	ALU
143658	7	39661353	39661744	+	3	87965	ALU-NREF_1215	7	39749709	39749709	83	82.6271	0.999974	2.95643	4.62523e-06	0.135914	9.999e-05	1.43724e-05	ALU
143673	7	39749188	39750082	+	3	0	ALU-NREF_1215	7	39749709	39749709	83	81.9787	0.999939	2.94537	6.69364e-13	-0.32851	9.999e-05	2.73443e-12	ALU
144727	7	50472911	50473894	+	4	0	ALU-NREF_1228	7	50473286	50473286	83	83.5998	1.00007	3.99348	1.05532e-05	-0.152866	0.00019998	3.91157e-05	ALU
145001	7	55370805	55371382	+	3	-1573	ALU-NREF_1233	7	55369232	55369232	83	84.1996	0.999974	3.01447	4.65779e-07	-0.245389	9.999e-05	1.15994e-06	ALU
145223	7	61099242	61100606	+	1	428107	ALU-NREF_1240	7	61528713	61528713	83	83.0162	1.00003	1.00066	4.2934e-05	-0.570079	0.00029997	4.28755e-05	ALU
145301	7	63757634	63758335	+	1	121845	ALU-NREF_1243	7	63880180	63880180	83	85.2857	0.999976	1.01764	1.51711e-07	-0.28005	9.999e-05	1.04085e-07	ALU
145316	7	63968665	63969668	+	1	-88485	ALU-NREF_1243	7	63880180	63880180	83	84.0213	0.999982	0.994625	2.07657e-05	-0.2145	9.999e-05	1.83637e-05	ALU
145335	7	64146794	64147533	+	1	-266614	ALU-NREF_1243	7	63880180	63880180	83	80.2117	1.00002	0.971542	1.90588e-06	-0.384343	9.999e-05	2.75948e-06	ALU
146095	7	76090745	76091490	+	3	475734	ALU-NREF_1251	7	76567224	76567224	83	85.7883	1.00006	2.87657	1.61304e-15	0.291181	9.999e-05	1.55894e-15	ALU
146100	7	76115855	76116488	+	3	450736	ALU-NREF_1251	7	76567224	76567224	83	86.0639	1	2.88151	6.18679e-09	0.239632	9.999e-05	9.35903e-09	ALU
146132	7	76614025	76614543	+	3	-46801	ALU-NREF_1251	7	76567224	76567224	83	84.848	0.999935	2.89868	2.19747e-15	-1.54554	9.999e-05	3.12373e-15	ALU
146133	7	76621524	76622504	+	3	-54300	ALU-NREF_1251	7	76567224	76567224	83	84.5563	0.999991	2.85416	2.70917e-06	-0.299502	9.999e-05	6.22954e-06	ALU
146991	7	83233921	83235176	+	5	770451	ALU-REF_432	7	84005627	84005627	83	82.4975	1.00006	4.59464	9.7372e-06	0.213451	0.00029997	4.75894e-05	ALU
157051	8	2242951	2243873	+	3	31700	ALU-NREF_1323	8	2275573	2275573	83	83.9078	1.00008	3.02242	2.96086e-07	0.566885	9.999e-05	7.69582e-07	ALU
157054	8	2258391	2259937	+	3	15636	ALU-NREF_1323	8	2275573	2275573	83	85.3506	1	3.10615	2.60455e-06	-0.417346	9.999e-05	5.82998e-06	ALU
157350	8	6607774	6608255	+	4	-19944	ALU-REF_475	8	6587830	6587830	83	83.2432	1.00009	3.87171	1.10256e-05	0.158806	0.00029997	4.13947e-05	ALU
157641	8	10181367	10181786	+	3	-515694	ALU-NREF_1334	8	9665673	9665673	83	82.8055	1.00005	2.90765	4.94035e-05	0.433256	0.00019998	0.000146547	ALU
158374	8	19658973	19660129	+	2	-35	ALU-NREF_1352	8	19658938	19658938	83	83.7457	0.999938	1.99479	4.8996e-08	0.685715	9.999e-05	8.51669e-08	ALU
158869	8	26833751	26834487	+	1	-91180	ALU-NREF_1358	8	26742571	26742571	83	83.5512	1.00005	0.99548	6.27629e-05	-0.299685	0.00019998	5.902e-05	ALU
159598	8	35133698	35134563	+	2	-64661	ALU-NREF_1363	8	35069037	35069037	83	81.5248	1.00009	1.98158	1.24757e-05	-0.333763	9.999e-05	2.95364e-05	ALU
160257	8	42039703	42039938	+	3	0	ALU-NREF_1372	8	42039906	42039906	83	84.1672	1.00006	2.81261	5.91166e-20	-0.573595	9.999e-05	9.11804e-20	ALU
160615	8	49061702	49062402	+	2	-16208	ALU-NREF_1373	8	49045494	49045494	83	82.1084	0.999994	1.96463	4.23487e-05	0.261957	0.00029997	9.15388e-05	ALU
160616	8	49063614	49064272	+	2	-18120	ALU-NREF_1373	8	49045494	49045494	83	83.7781	0.999947	2.0421	1.48546e-07	0.34796	9.999e-05	2.65368e-07	ALU
161259	8	55047122	55048076	+	3	-75272	ALU-REF_490	8	54971850	54971850	83	81.9625	1.00006	2.99889	1.15661e-06	0.182424	9.999e-05	4.04518e-06	ALU
161328	8	56014659	56015881	+	2	17210	ALU-NREF_1386	8	56033091	56033091	83	81.2168	1.00005	2.00051	5.24518e-05	-0.130499	9.999e-05	0.000126394	ALU
161925	8	61150667	61151479	+	3	53508	ALU-REF_493	8	61204987	61204987	83	83.5188	1.00009	3.10018	4.63024e-08	0.258228	9.999e-05	1.30109e-07	ALU
161961	8	61471553	61472171	+	3	54626	ALU-NREF_1396	8	61526797	61526797	83	84.8156	0.99991	3.102	4.32475e-08	0.203231	9.999e-05	9.5601e-08	ALU
161969	8	61522437	61523184	+	3	3613	ALU-NREF_1396	8	61526797	61526797	83	82.8865	1.00009	3.04672	1.41218e-08	0.331702	9.999e-05	4.3948e-08	ALU
162316	8	63795812	63796327	+	2	-451331	ALU-NREF_1397	8	63344481	63344481	83	83.1621	0.999915	1.98468	6.22104e-05	-0.587442	0.00109989	0.000121522	ALU
162921	8	68742716	68743384	+	2	-15395	ALU-REF_495	8	68727321	68727321	83	84.9939	1.00006	2.01578	1.335e-05	-0.354842	0.00029997	2.11549e-05	ALU
163601	8	74282639	74283501	+	3	0	ALU-NREF_1404	8	74283383	74283383	83	83.4863	0.999987	3.00458	6.25965e-09	-0.43123	9.999e-05	1.69838e-08	ALU
173024	9	178789	179490	+	2	82973	ALU-NREF_1492	9	262463	262463	83	85.2209	1.00006	2.0403	4.03914e-13	1.73435	9.999e-05	4.0006e-13	ALU
173085	9	846956	848041	+	3	871	ALU-NREF_1493	9	848912	848912	83	80.7953	0.999998	2.92085	9.44686e-06	0.187359	9.999e-05	3.631e-05	ALU
174171	9	9949491	9950411	+	3	18	ALU-REF_533	9	9950429	9950429	83	85.2695	0.999948	3.07294	1.9145e-05	-0.151916	0.00019998	4.52185e-05	ALU
174425	9	12735195	12736143	+	1	-133395	ALU-NREF_1507	9	12601800	12601800	83	83.6322	0.99995	1.00811	1.52256e-05	0.34504	9.999e-05	1.42455e-05	ALU
175044	9	18451182	18452034	+	3	299793	ALU-REF_540	9	18751827	18751827	83	83.8592	0.999909	2.9988	2.2022e-05	-0.286601	0.00019998	5.99001e-05	ALU
175448	9	21412070	21412811	+	2	-150121	ALU-NREF_1517	9	21261949	21261949	83	83.0324	1.00007	1.93452	1.34811e-06	-0.291379	9.999e-05	2.59308e-06	ALU
176711	9	33719439	33720465	+	1	-19305	ALU-NREF_1528	9	33700134	33700134	83	80.4873	1.00008	0.992004	2.00862e-10	0.351487	9.999e-05	3.73764e-10	ALU
177180	9	37568341	37568524	+	2	27824	ALU-NREF_1531	9	37596348	37596348	83	86.0477	1.00002	1.96648	7.63247e-08	0.362746	9.999e-05	8.6506e-08	ALU
177786	9	71783558	71784324	+	1	-5631	ALU-REF_547	9	71777927	71777927	83	82.1408	0.999937	0.998503	3.75545e-10	0.136569	9.999e-05	4.62888e-10	ALU
177791	9	71795482	71796089	+	1	-17555	ALU-REF_547	9	71777927	71777927	83	83.0811	1.00005	1.00698	2.74839e-05	-0.119055	9.999e-05	2.74119e-05	ALU
179776	9	96266907	96267563	+	3	103823	ALU-NREF_1569	9	96371386	96371386	83	82.5785	0.999902	3.00917	8.44092e-08	0.147891	9.999e-05	2.74392e-07	ALU
179787	9	96374854	96375594	+	4	-3468	ALU-NREF_1569	9	96371386	96371386	83	85.7234	0.999996	4.06927	1.61061e-05	0.134228	0.00019998	4.75053e-05	ALU
180304	9	102828480	102829412	+	2	-41791	ALU-NREF_1581	9	102786689	102786689	83	81.5086	0.999989	1.97432	6.90239e-12	0.318571	9.999e-05	2.10375e-11	ALU
180850	9	107762462	107763258	+	2	-15561	SVA-NREF_69	9	107746901	107746901	83	82.0436	0.999972	1.95625	1.18297e-05	0.45578	9.999e-05	2.60104e-05	SVA
181020	9	109088584	109089455	+	2	-64467	ALU-REF_564	9	109024117	109024117	83	81.5248	0.999939	1.95694	8.68226e-10	0.548106	9.999e-05	2.40121e-09	ALU
181228	9	111881618	111882655	+	5	67078	ALU-NREF_1592	9	111949733	111949733	83	83.0162	1.0001	4.91098	2.13043e-06	-0.0822227	9.999e-05	1.04262e-05	ALU
181362	9	112905310	112905447	+	8	2618	ALU-NREF_1595	9	112908065	112908065	83	81.1195	0.988152	7.52601	1.56794e-08	-0.32155	9.999e-05	2.07391e-07	ALU
181426	9	113570495	113571573	+	4	0	ALU-NREF_1599	9	113571250	113571250	83	84.3779	0.999903	3.98637	9.61606e-17	-0.396638	9.999e-05	2.14434e-16	ALU
181430	9	113583288	113583900	+	4	-12038	ALU-NREF_1599	9	113571250	113571250	83	80.8926	0.999965	3.82848	1.02731e-05	-0.21739	9.999e-05	5.1044e-05	ALU
181572	9	114838858	114839625	+	1	62721	ALU-REF_567	9	114902346	114902346	83	84.5238	1.00004	1.01731	0.000110631	-0.341764	9.999e-05	9.71985e-05	ALU
181588	9	114912038	114912676	+	1	-9692	ALU-REF_567	9	114902346	114902346	83	83.3566	1.00001	1.00283	0.000110404	0.32334	0.00019998	0.000106976	ALU
181681	9	115912899	115913670	+	1	23415	ALU-REF_568	9	115937085	115937085	83	83.1135	0.999979	0.990727	6.43223e-05	0.0742099	0.00029997	6.30034e-05	ALU
181687	9	115973040	115973732	+	1	-35955	ALU-REF_568	9	115937085	115937085	83	85.7883	1.00004	1.02131	9.84764e-07	0.293914	9.999e-05	6.60288e-07	ALU
181879	9	117954504	117955638	+	2	-26223	ALU-NREF_1602	9	117928281	117928281	83	82.1895	0.999952	1.97556	8.3099e-06	0.244893	9.999e-05	1.81911e-05	ALU
181880	9	117957029	117957386	+	2	-28748	ALU-NREF_1602	9	117928281	117928281	83	84.4752	1.00006	2.05892	8.2949e-05	0.222782	0.00029997	0.000147429	ALU
181884	9	117969224	117970082	+	2	-40943	ALU-NREF_1602	9	117928281	117928281	83	81.9625	1.00009	1.99236	2.93288e-07	0.28177	9.999e-05	6.926e-07	ALU
181886	9	117973639	117974241	+	2	-45358	ALU-NREF_1602	9	117928281	117928281	83	84.4752	0.999948	2.00355	2.91488e-05	0.22623	0.00019998	4.95802e-05	ALU
181887	9	117975039	117975534	+	2	-46758	ALU-NREF_1602	9	117928281	117928281	83	83.9564	1.00001	1.96231	4.00752e-05	0.213522	0.00029997	7.09385e-05	ALU
183311	9	136765277	136766808	+	2	-4237	SVA-REF_13	9	136761040	136761040	83	83.5188	0.99991	2.01253	6.92717e-05	0.148138	0.00029997	0.000132374	SVA
37317	2	154143548	154144594	+	4	16091	ALU-NREF_352	2	154160685	154160685	83	82.9838	1.00005	3.90091	2.95039e-05	0.208325	0.00019998	0.000115237	ALU
37389	2	154538139	154539035	+	2	-126447	ALU-REF_77	2	154411692	154411692	83	84.232	0.999982	2.04159	3.00287e-05	0.214189	0.00019998	5.34787e-05	ALU
37841	2	157048808	157049479	+	2	27633	ALU-REF_78	2	157077112	157077112	83	82.6271	1.00005	1.98126	1.21382e-12	0.505373	9.999e-05	2.6972e-12	ALU
40665	2	178371601	178372753	+	5	-20129	ALU-NREF_369	2	178351472	178351472	83	86.4205	1.00002	4.33901	3.85174e-05	-0.234832	0.00039996	0.000115459	ALU
40669	2	178405715	178406736	+	5	-86985	ALU-NREF_368	2	178318730	178318730	83	83.227	1.00003	4.14539	1.43449e-07	0.2091	9.999e-05	5.71435e-07	ALU
40682	2	178498968	178500076	+	5	-180238	ALU-NREF_368	2	178318730	178318730	83	86.6637	1.00001	4.29298	1.51551e-09	0.503509	9.999e-05	2.83264e-09	ALU
40690	2	178648621	178649490	+	5	0	ALU-NREF_373	2	178648956	178648956	83	86.1936	1.00007	4.34818	1.71294e-16	-0.598686	9.999e-05	1.96038e-16	ALU
41143	2	181856402	181857079	+	3	23667	ALU-NREF_374	2	181880746	181880746	83	86.1773	0.999948	2.85908	1.78343e-05	-0.12867	9.999e-05	3.51797e-05	ALU
41222	2	182239396	182240450	+	3	-358650	ALU-NREF_374	2	181880746	181880746	83	87.377	0.999924	2.85151	2.1553e-05	0.114706	0.00019998	3.72212e-05	ALU
41423	2	183308695	183309448	+	1	6359	ALU-REF_87	2	183315807	183315807	83	80.3576	1.00004	0.974557	7.18356e-06	0.203563	9.999e-05	9.80604e-06	ALU
42223	2	187214066	187214647	+	1	-5071	ALU-NREF_382	2	187208995	187208995	83	84.1996	1.00006	1.01994	1.2844e-05	0.368375	9.999e-05	1.13241e-05	ALU
42259	2	187347265	187347592	+	2	-138270	ALU-NREF_382	2	187208995	187208995	83	83.4863	1.00005	1.99278	1.2135e-05	0.202199	9.999e-05	2.27828e-05	ALU
42277	2	187424093	187425119	+	2	-215098	ALU-NREF_382	2	187208995	187208995	83	81.1844	1.00003	1.95267	8.30918e-12	-0.519223	9.999e-05	2.73863e-11	ALU
42494	2	188296165	188297026	+	2	-80446	ALU-REF_88	2	188215719	188215719	83	84.6211	1.00007	2.03008	5.10867e-06	-0.235714	9.999e-05	8.37217e-06	ALU
42907	2	189958965	189959572	+	2	0	ALU-NREF_384	2	189959434	189959434	83	82.3354	0.999995	1.99053	6.0724e-06	-0.171242	9.999e-05	1.31755e-05	ALU
43141	2	191329614	191330355	+	1	148362	L1-NREF_29	2	191478717	191478717	83	84.4752	1	1.00741	9.29129e-08	-0.27656	9.999e-05	7.19397e-08	L1
43142	2	191332356	191332870	+	1	145847	L1-NREF_29	2	191478717	191478717	83	81.541	1.00004	0.984758	7.01831e-10	-0.273126	9.999e-05	9.74686e-10	L1
43143	2	191333489	191334308	+	1	144409	L1-NREF_29	2	191478717	191478717	83	83.9078	0.999979	0.997262	2.42879e-05	-0.277414	9.999e-05	2.18555e-05	L1
43144	2	191334622	191334836	+	1	143881	L1-NREF_29	2	191478717	191478717	83	82.5137	1.00001	0.99112	3.04755e-07	-0.349384	9.999e-05	3.27183e-07	L1
43159	2	191398628	191399913	+	1	78804	L1-NREF_29	2	191478717	191478717	83	83.4863	1.00004	1.01492	3.09936e-06	-0.0678424	9.999e-05	2.9407e-06	L1
43171	2	191453124	191454291	+	1	24426	L1-NREF_29	2	191478717	191478717	83	81.0385	1.00005	0.966566	9.92975e-06	-0.167034	9.999e-05	1.22316e-05	L1
45090	2	201637136	201638165	+	2	0	L1-NREF_35	2	201638085	201638085	83	84.232	1.00003	2.00011	2.23017e-21	1.24484	9.999e-05	2.25691e-21	L1
45768	2	208851683	208852390	+	4	57947	ALU-REF_94	2	208910337	208910337	83	81.5248	1.00005	3.9229	6.95655e-07	0.155317	9.999e-05	3.42739e-06	ALU
45769	2	208857851	208858618	+	4	51719	ALU-REF_94	2	208910337	208910337	83	82.5299	1.00004	4.05334	1.45418e-07	0.240556	9.999e-05	6.39078e-07	ALU
45773	2	208889884	208890847	+	4	19490	ALU-REF_94	2	208910337	208910337	83	81.5248	0.999958	3.9443	1.86895e-05	0.0639317	0.00019998	8.75831e-05	ALU
46036	2	210377412	210378220	+	2	-116658	ALU-NREF_402	2	210260754	210260754	83	81.7842	1.00002	1.96435	8.40676e-06	-0.289475	9.999e-05	1.92392e-05	ALU
46746	2	213369978	213370796	+	4	-201845	ALU-NREF_405	2	213168133	213168133	83	85.9504	1.00006	3.76059	1.74466e-05	-0.401022	0.00039996	4.63962e-05	ALU
47647	2	219335148	219336306	+	1	240303	ALU-NREF_410	2	219576609	219576609	83	82.4326	1.00006	0.981554	0.000136172	0.15094	0.00029997	0.000140881	ALU
47929	2	222674518	222675201	+	1	806490	ALU-REF_99	2	223481691	223481691	83	84.6373	1.00005	1.03366	6.588e-05	-0.187367	9.999e-05	5.76037e-05	ALU
48103	2	223764881	223765830	+	4	31529	ALU-REF_101	2	223797359	223797359	83	84.2158	1.00008	4.00319	2.5384e-05	0.191132	0.00019998	8.85038e-05	ALU
48111	2	223806393	223806706	+	4	-9034	ALU-REF_101	2	223797359	223797359	83	83.1297	0.999986	4.00871	1.20134e-08	0.402124	9.999e-05	4.69211e-08	ALU
48112	2	223808192	223809142	+	4	-10833	ALU-REF_101	2	223797359	223797359	83	81.0547	0.999903	3.80569	7.03381e-23	0.516717	9.999e-05	8.53023e-22	ALU
48260	2	224948895	224949601	+	1	-772845	ALU-NREF_415	2	224176050	224176050	83	84.1996	0.999976	0.996116	1.70543e-06	-0.209209	9.999e-05	1.42915e-06	ALU
49338	2	232276824	232277529	+	2	2285	ALU-NREF_422	2	232279814	232279814	83	81.0061	1.00003	1.94026	8.89412e-08	-0.0907459	9.999e-05	2.46487e-07	ALU
49463	2	233822211	233823251	+	1	22642	ALU-NREF_423	2	233845893	233845893	83	82.6109	0.999963	1.00194	4.87244e-05	-0.190238	9.999e-05	5.08822e-05	ALU
85164	4	112552707	112553617	+	3	144820	ALU-NREF_701	4	112698437	112698437	83	86.9393	0.999991	2.49226	6.03637e-09	-0.181542	9.999e-05	6.56488e-09	ALU
85166	4	112558036	112558756	+	3	139681	ALU-NREF_701	4	112698437	112698437	83	87.4256	0.999953	2.5154	1.83148e-07	-0.404475	9.999e-05	2.16902e-07	ALU
85345	4	113557896	113558872	+	4	-87921	ALU-REF_202	4	113469975	113469975	83	86.0801	1.00009	3.50212	2.80459e-06	0.0495168	9.999e-05	6.40439e-06	ALU
85575	4	115029815	115030935	+	2	101772	L1-NREF_70	4	115132707	115132707	83	82.9352	1	1.95947	7.26839e-12	-0.465721	9.999e-05	1.45125e-11	L1
86265	4	119340493	119341250	+	4	-575228	L1-NREF_72	4	118765265	118765265	83	83.9889	1.0001	3.93281	1.26598e-06	-0.524593	0.00019998	4.29608e-06	L1
86356	4	120016797	120017157	+	5	54510	ALU-NREF_708	4	120071667	120071667	83	81.3465	1.00006	4.72763	1.27519e-05	0.431055	0.00019998	7.35931e-05	ALU
86357	4	120017517	120018082	+	5	53585	ALU-NREF_708	4	120071667	120071667	83	83.227	1.00011	4.84892	4.04059e-06	0.605113	9.999e-05	1.89802e-05	ALU
86383	4	120375445	120376299	+	4	263605	ALU-NREF_709	4	120639904	120639904	83	82.3354	1.00002	3.89526	2.70199e-07	0.0562446	9.999e-05	1.17492e-06	ALU
87133	4	125639905	125640426	+	6	18599	ALU-NREF_719	4	125659025	125659025	83	81.5734	1.00201	5.90608	7.34805e-10	0.282285	9.999e-05	5.84288e-09	ALU
88216	4	133045136	133045966	+	5	71876	ALU-NREF_722	4	133117842	133117842	83	82.7406	0.999993	4.58183	1.23229e-05	0.263994	9.999e-05	5.82698e-05	ALU
90955	4	152587993	152588740	+	2	-247285	L1-REF_40	4	152340708	152340708	83	85.4316	1.00001	2.02955	6.71469e-06	0.29069	9.999e-05	9.97291e-06	L1
92571	4	161744338	161745229	+	3	-51813	ALU-NREF_741	4	161692525	161692525	83	83.4539	1	3.0299	1.13276e-05	0.235999	0.00019998	3.24673e-05	ALU
93338	4	166158957	166159741	+	2	31043	ALU-NREF_745	4	166190784	166190784	83	82.7082	0.999984	2.03234	8.35854e-10	-0.239983	9.999e-05	1.81938e-09	ALU
93358	4	166252319	166252929	+	1	-61535	ALU-NREF_745	4	166190784	166190784	83	84.4752	0.999982	1.01451	3.53642e-10	0.299234	9.999e-05	2.50356e-10	ALU
93556	4	167414948	167416185	+	3	-2918	ALU-REF_229	4	167412030	167412030	83	83.3566	0.99997	2.9006	7.86194e-11	-0.303926	9.999e-05	2.0784e-10	ALU
94779	4	173998325	173998801	+	3	45427	ALU-NREF_752	4	174044228	174044228	83	86.1287	1.00002	3.06699	2.69994e-10	-0.565311	9.999e-05	3.81752e-10	ALU
96089	4	181551338	181551886	+	4	-1909	ALU-REF_233	4	181549429	181549429	83	82.7406	0.999923	4.06955	5.36357e-06	-0.248743	9.999e-05	2.26008e-05	ALU
96622	4	185589300	185590151	+	7	61526	ALU-NREF_771	4	185651677	185651677	83	81.6869	1.00002	6.57821	1.08704e-06	-0.265957	9.999e-05	8.70188e-06	ALU
96731	4	186176740	186177486	+	7	21380	ALU-REF_237	4	186198866	186198866	83	83.535	0.991827	6.73856	3.67183e-13	-0.221264	9.999e-05	2.59704e-12	ALU
96735	4	186187023	186187652	+	7	11214	ALU-REF_237	4	186198866	186198866	83	83.4539	0.98822	6.71854	5.21454e-08	-0.135765	9.999e-05	3.85677e-07	ALU
61508	3	107418398	107418990	+	1	474345	ALU-NREF_528	3	107893335	107893335	83	82.3354	1.00005	0.984173	6.45344e-05	0.256522	0.00029997	6.79467e-05	ALU
63085	3	120492676	120493373	+	1	-67201	ALU-NREF_542	3	120425475	120425475	83	80.7791	1.00005	0.995335	1.50227e-09	-0.258074	9.999e-05	2.47401e-09	ALU
63433	3	124358394	124359314	+	2	47208	ALU-NREF_545	3	124406522	124406522	83	86.2422	0.999966	2.06319	2.10704e-12	-0.409508	9.999e-05	1.61912e-12	ALU
63451	3	124553700	124554516	+	2	14169	ALU-NREF_547	3	124568685	124568685	83	82.8865	1.00002	1.97094	1.29685e-20	-0.36075	9.999e-05	2.71185e-20	ALU
63592	3	126673186	126674350	+	2	-314263	ALU-REF_134	3	126358923	126358923	83	82.4002	0.999972	1.94668	2.04385e-05	0.498318	9.999e-05	4.26535e-05	ALU
63594	3	126679835	126680522	+	2	-320912	ALU-REF_134	3	126358923	126358923	83	83.9889	1.00007	1.97362	6.35645e-05	0.269698	0.00019998	0.000113303	ALU
63967	3	131364416	131364988	+	2	-9753	ALU-REF_136	3	131354663	131354663	83	85.4641	1.00001	1.88664	3.11616e-05	-0.507799	9.999e-05	4.47696e-05	ALU
64264	3	134650182	134650677	+	1	23270	L1-REF_21	3	134673947	134673947	83	82.465	1.00006	0.994568	0.000149514	-0.383083	0.00029997	0.000156166	L1
64480	3	137801147	137802294	+	2	43092	SVA-NREF_18	3	137845386	137845386	83	83.8268	0.999944	1.96385	6.55054e-05	0.452394	0.00059994	0.000118296	SVA
64652	3	140527817	140529012	+	2	-3381	ALU-NREF_552	3	140524436	140524436	83	84.9939	1.00006	2.01794	3.54111e-06	-0.140271	9.999e-05	5.44648e-06	ALU
64938	3	143196804	143197429	+	1	-1944	ALU-NREF_554	3	143194860	143194860	83	81.3303	0.999944	1.00162	1.56618e-09	-0.262125	9.999e-05	2.29301e-09	ALU
66277	3	151148783	151149318	+	2	-228	L1-NREF_48	3	151148555	151148555	83	81.7518	1.00004	1.98473	3.36214e-07	-0.355216	9.999e-05	8.17841e-07	L1
66278	3	151149608	151150320	+	2	-1053	L1-NREF_48	3	151148555	151148555	83	83.9402	0.999941	2.01216	3.42403e-06	-0.237627	9.999e-05	6.06574e-06	L1
66897	3	155266719	155267418	+	6	143540	ALU-REF_139	3	155410958	155410958	83	83.308	0.996355	5.82983	1.22472e-05	0.112762	0.00019998	7.1309e-05	ALU
66898	3	155271562	155272033	+	6	138925	ALU-REF_139	3	155410958	155410958	83	82.6434	0.989719	5.79335	4.35438e-10	0.216095	9.999e-05	3.37923e-09	ALU
66926	3	155518083	155519064	+	6	-107125	ALU-REF_139	3	155410958	155410958	83	83.0648	1.0001	5.83961	2.06378e-05	0.168302	0.00019998	0.000119505	ALU
67360	3	158193261	158194438	+	3	-76359	ALU-REF_140	3	158116902	158116902	83	86.2098	0.999989	2.87097	5.67081e-05	-0.166054	9.999e-05	0.000116756	ALU
67850	3	161206017	161206484	+	1	40229	ALU-REF_144	3	161246713	161246713	83	82.5785	1.00007	1.00657	7.68513e-05	0.221333	9.999e-05	8.0638e-05	ALU
69603	3	172322702	172323152	+	1	0	ALU-NREF_579	3	172322950	172322950	83	81.9625	0.999968	1.01007	1.62959e-06	-0.322214	9.999e-05	1.91393e-06	ALU
71548	3	185016909	185017345	+	2	0	ALU-REF_149	3	185017331	185017331	83	83.4215	1	1.98403	3.20221e-13	-0.330218	9.999e-05	5.53372e-13	ALU
71549	3	185017501	185018160	+	2	-170	ALU-REF_149	3	185017331	185017331	83	83.5512	0.999912	1.98254	1.39257e-15	-0.316536	9.999e-05	2.2307e-15	ALU
71551	3	185025797	185026413	+	2	-8466	ALU-REF_149	3	185017331	185017331	83	81.9625	1	1.96626	8.64162e-06	-0.14283	9.999e-05	1.93539e-05	ALU
72349	3	192017652	192018150	+	3	358376	ALU-NREF_607	3	192376526	192376526	83	83.4053	1.00002	3.0062	2.85302e-06	-0.368405	9.999e-05	8.10669e-06	ALU
72468	3	193164595	193165370	+	4	188815	L1-NREF_51	3	193354185	193354185	83	80.9898	0.999919	3.94726	6.55357e-06	-0.220939	9.999e-05	3.35391e-05	L1
12632	1	165655323	165656550	+	2	2756	ALU-NREF_134	1	165659306	165659306	83	81.3627	1.00003	1.97915	1.34406e-06	0.187684	9.999e-05	3.38385e-06	ALU
14390	1	185366990	185368156	+	1	4941	ALU-REF_24	1	185373097	185373097	83	82.692	0.999979	1.00587	2.72705e-05	-0.189871	9.999e-05	2.84011e-05	ALU
14392	1	185372021	185372933	+	1	164	ALU-REF_24	1	185373097	185373097	83	81.849	0.999998	0.985206	0.000119442	-0.139544	0.00039996	0.000131299	ALU
14393	1	185373486	185373787	+	1	-389	ALU-REF_24	1	185373097	185373097	83	83.2756	1.00006	1.0199	1.67231e-07	-0.421439	9.999e-05	1.62527e-07	ALU
14394	1	185374042	185374535	+	1	-945	ALU-REF_24	1	185373097	185373097	83	83.9564	1.00003	1.0037	1.20095e-05	-0.193801	9.999e-05	1.0726e-05	ALU
14395	1	185375210	185376123	+	1	-2113	ALU-REF_24	1	185373097	185373097	83	83.8754	1.00005	1.01225	1.91798e-06	-0.260228	9.999e-05	1.71181e-06	ALU
14396	1	185377686	185378365	+	1	-4589	ALU-REF_24	1	185373097	185373097	83	83.2432	0.999963	1.01041	4.57026e-06	-0.186671	9.999e-05	4.47304e-06	ALU
14397	1	185379166	185379657	+	1	-6069	ALU-REF_24	1	185373097	185373097	83	81.6707	0.99999	1.00143	1.39422e-05	-0.212412	9.999e-05	1.63781e-05	ALU
14399	1	185381422	185382190	+	1	-8325	ALU-REF_24	1	185373097	185373097	83	81.9787	0.999971	0.980012	1.55365e-05	-0.207226	9.999e-05	1.7194e-05	ALU
14844	1	188206692	188207745	+	3	-20228	ALU-NREF_154	1	188186464	188186464	83	84.2807	1.00009	2.9401	3.52255e-05	-0.196634	0.00029997	8.99738e-05	ALU
16446	1	196692346	196693142	+	1	86061	ALU-NREF_168	1	196779203	196779203	83	82.773	0.999993	0.992314	2.89141e-06	0.243091	9.999e-05	2.96092e-06	ALU
16451	1	196732375	196733630	+	1	45573	ALU-NREF_168	1	196779203	196779203	83	82.8865	1.00001	0.995642	1.18654e-07	-0.331948	9.999e-05	1.20497e-07	ALU
16452	1	196734439	196734964	+	1	44239	ALU-NREF_168	1	196779203	196779203	83	83.3404	0.999987	1.01561	8.31732e-09	-0.523744	9.999e-05	7.87453e-09	ALU
16460	1	196817156	196818433	+	1	-37953	ALU-NREF_168	1	196779203	196779203	83	80.5684	1.00001	0.97365	8.72745e-05	0.194824	0.00019998	0.000108043	ALU
17340	1	203889379	203890080	+	2	454975	ALU-NREF_175	1	204345055	204345055	83	82.6758	1.00005	2.00867	6.4699e-06	-0.208119	9.999e-05	1.35419e-05	ALU
18082	1	212470641	212471075	+	2	61	SVA-REF_1	1	212471136	212471136	83	83.9727	0.999933	1.9931	7.01466e-07	-0.252984	9.999e-05	1.20384e-06	SVA
18924	1	218355755	218356888	+	2	-110126	L1-REF_8	1	218245629	218245629	83	84.0375	0.999942	1.98329	5.98215e-05	-0.0760848	0.00019998	0.000106667	L1
19466	1	221996401	221997133	+	2	-27230	ALU-NREF_190	1	221969171	221969171	83	81.8166	0.999949	2.00363	1.86873e-06	-0.167961	9.999e-05	4.43935e-06	ALU
19467	1	221997287	221997863	+	2	-28116	ALU-NREF_190	1	221969171	221969171	83	85.1398	0.999934	2.03622	3.6296e-06	-0.248051	9.999e-05	5.53476e-06	ALU
19556	1	222793848	222794460	+	2	76237	ALU-NREF_191	1	222870697	222870697	83	84.9615	1.00004	2.02403	1.05922e-07	-0.278959	9.999e-05	1.51454e-07	ALU
19618	1	223895016	223896033	+	2	15541	ALU-NREF_192	1	223911574	223911574	83	83.924	1.00005	2.0159	9.63359e-09	0.433056	9.999e-05	1.60511e-08	ALU
20057	1	227446682	227447257	+	3	15699	ALU-NREF_197	1	227462956	227462956	83	83.4215	0.999949	2.98864	2.41797e-05	-0.289257	9.999e-05	6.89206e-05	ALU
20230	1	229063786	229064806	+	1	-103853	ALU-NREF_200	1	228959933	228959933	83	82.3354	1.00001	1.01566	7.97572e-05	0.165298	9.999e-05	8.65553e-05	ALU
20483	1	232593231	232593854	+	4	-5457	ALU-NREF_204	1	232587774	232587774	83	84.459	1.00003	4.04272	5.00505e-11	-0.362575	9.999e-05	1.36908e-10	ALU
20503	1	232769753	232770242	+	4	5288	ALU-REF_29	1	232775530	232775530	83	84.4914	1.00009	4.00901	2.33922e-06	0.213962	9.999e-05	7.59512e-06	ALU
20929	1	236592825	236593555	+	2	1371	ALU-REF_30	1	236594926	236594926	83	83.1783	0.999977	1.9571	1.01562e-08	0.167083	9.999e-05	1.91727e-08	ALU
21621	1	241939975	241940782	+	3	-31356	ALU-NREF_218	1	241908619	241908619	83	82.6596	1.00008	2.99978	7.6472e-06	0.325653	9.999e-05	2.39314e-05	ALU
22032	1	246378146	246378785	+	3	27917	ALU-NREF_221	1	246406702	246406702	83	88.4307	0.999926	2.87378	3.36245e-05	-0.17627	0.00029997	5.33324e-05	ALU
22042	1	246495343	246495679	+	3	96663	ALU-NREF_224	1	246592342	246592342	83	84.9129	0.999964	2.77782	1.65956e-06	0.260609	9.999e-05	3.49727e-06	ALU
22052	1	246580607	246581645	+	3	-14924	ALU-NREF_223	1	246565683	246565683	83	85.4803	0.999986	2.82861	1.28802e-10	-0.255007	9.999e-05	1.93091e-10	ALU
129769	6	104342860	104343508	+	3	7071	ALU-NREF_1096	6	104350579	104350579	83	83.6322	0.999973	2.93944	2.7909e-05	0.208083	9.999e-05	7.64529e-05	ALU
130098	6	106982116	106982972	+	1	651	ALU-REF_379	6	106983623	106983623	83	83.5188	0.999945	1.00033	1.29127e-05	-0.283172	9.999e-05	1.21399e-05	ALU
130102	6	106993953	106995354	+	1	-10330	ALU-REF_379	6	106983623	106983623	83	80.5521	1.00006	1.01136	5.77008e-07	0.344011	9.999e-05	8.56574e-07	ALU
130449	6	111194526	111194722	+	2	100492	ALU-REF_381	6	111295214	111295214	83	87.8795	0.999954	2.05737	5.2578e-05	0.411535	0.00029997	6.50132e-05	ALU
131407	6	116782973	116784089	+	4	-32159	ALU-REF_383	6	116750814	116750814	83	83.9889	1.00005	3.65372	5.20336e-08	-0.156305	9.999e-05	1.58157e-07	ALU
131408	6	116786319	116786976	+	4	-35505	ALU-REF_383	6	116750814	116750814	83	83.0324	1.0001	3.59503	4.44087e-06	-0.141297	9.999e-05	1.58789e-05	ALU
131435	6	116989345	116990237	+	4	-90659	ALU-NREF_1114	6	116898686	116898686	83	83	0.999978	3.64384	1.95595e-06	0.0602528	9.999e-05	7.129e-06	ALU
132662	6	123723063	123723737	+	5	39680	ALU-REF_388	6	123763417	123763417	83	82.384	1.00006	5.02572	3.90829e-07	-0.49177	9.999e-05	2.16822e-06	ALU
133861	6	130523825	130525004	+	10	89794	ALU-NREF_1141	6	130614798	130614798	83	80.7629	1.01769	9.17175	6.82008e-06	-0.221037	9.999e-05	7.01249e-05	ALU
133866	6	130581095	130582506	+	10	32292	ALU-NREF_1141	6	130614798	130614798	83	82.1246	0.945273	8.5925	5.43074e-06	-0.107626	0.00039996	9.14913e-05	ALU
133869	6	130591128	130591932	+	10	22866	ALU-NREF_1141	6	130614798	130614798	83	82.465	0.973729	9.03901	3.81612e-15	-0.580723	9.999e-05	9.58422e-14	ALU
133870	6	130597971	130600947	+	10	13851	ALU-NREF_1141	6	130614798	130614798	83	83.8916	0.980768	9.42903	1.37226e-08	-0.190494	9.999e-05	1.48289e-07	ALU
133871	6	130603224	130604007	+	10	10791	ALU-NREF_1141	6	130614798	130614798	83	82.9189	0.98143	9.24195	5.5546e-08	-0.187206	9.999e-05	6.86323e-07	ALU
133874	6	130614791	130615416	+	10	0	ALU-NREF_1141	6	130614798	130614798	83	82.157	0.977391	9.25593	4.85894e-07	-0.166518	9.999e-05	6.82888e-06	ALU
133876	6	130627383	130628028	+	10	-12585	ALU-NREF_1141	6	130614798	130614798	83	83.1783	0.987886	9.41846	2.15103e-11	-0.3481	9.999e-05	2.53958e-10	ALU
133878	6	130630169	130630792	+	10	-15371	ALU-NREF_1141	6	130614798	130614798	83	83.3404	0.973559	9.15396	3.09143e-10	-0.336508	9.999e-05	4.4317e-09	ALU
133885	6	130686264	130687141	+	10	-71466	ALU-NREF_1141	6	130614798	130614798	83	82.0273	0.982471	9.07042	3.59581e-09	-0.216015	9.999e-05	5.46278e-08	ALU
133886	6	130687371	130688083	+	10	-72573	ALU-NREF_1141	6	130614798	130614798	83	83.7619	0.983907	9.35476	1.52993e-08	-0.257808	9.999e-05	1.59734e-07	ALU
133890	6	130702514	130703593	+	10	-87716	ALU-NREF_1141	6	130614798	130614798	83	83.5998	0.987322	9.35169	1.89444e-12	-0.318516	9.999e-05	2.03204e-11	ALU
133892	6	130717843	130718376	+	10	-103045	ALU-NREF_1141	6	130614798	130614798	83	81.5896	0.990924	8.93459	5.09943e-08	-0.391006	9.999e-05	6.76446e-07	ALU
137576	6	157956735	157957480	+	4	361	ALU-REF_401	6	157957841	157957841	83	84.0537	0.999976	3.83446	1.69804e-05	0.0981477	0.00019998	5.75345e-05	ALU
137577	6	157959086	157959745	+	4	-1245	ALU-REF_401	6	157957841	157957841	83	83.8916	1.00008	3.75661	6.49509e-06	0.160785	9.999e-05	2.17331e-05	ALU
138380	6	163858437	163859050	+	3	-44207	ALU-NREF_1187	6	163814230	163814230	83	84.5563	0.999987	3.01795	2.98479e-05	-0.324563	0.00039996	7.57888e-05	ALU
108934	5	112578323	112579409	+	3	302008	ALU-REF_302	5	112881417	112881417	83	83.3729	1.00007	2.99424	1.91114e-06	-0.223005	9.999e-05	5.42025e-06	ALU
109254	5	114685002	114686111	+	2	45202	ALU-REF_304	5	114731313	114731313	83	81.9625	1.00006	1.93302	7.14841e-05	0.201741	0.00019998	0.000153367	ALU
109405	5	115607111	115607476	+	4	-108220	ALU-NREF_894	5	115498891	115498891	83	82.5137	1.00001	3.91315	4.13275e-06	0.34346	9.999e-05	1.7259e-05	ALU
110629	5	122110337	122111310	+	3	163031	ALU-REF_311	5	122274341	122274341	83	83.1783	0.999932	3.02176	2.40859e-05	0.0360886	9.999e-05	7.13679e-05	ALU
110631	5	122115585	122116567	+	3	157774	ALU-REF_311	5	122274341	122274341	83	83.7619	0.999964	3.00501	2.52015e-08	-0.205423	9.999e-05	6.53742e-08	ALU
110655	5	122273277	122274067	+	4	274	ALU-REF_311	5	122274341	122274341	83	82.1732	1.00005	3.86822	1.84373e-05	-0.256364	0.00019998	7.85003e-05	ALU
110663	5	122302767	122303832	+	4	-28426	ALU-REF_311	5	122274341	122274341	83	83.2594	1.00002	4.10788	6.59278e-08	-0.24816	9.999e-05	2.58235e-07	ALU
110667	5	122314114	122314911	+	4	-39773	ALU-REF_311	5	122274341	122274341	83	82.1408	0.999976	4.01105	1.56304e-07	-0.261575	9.999e-05	7.27297e-07	ALU
110669	5	122319130	122319612	+	4	-44789	ALU-REF_311	5	122274341	122274341	83	84.0699	1.00001	4.05256	2.95077e-10	-0.43949	9.999e-05	9.18654e-10	ALU
110670	5	122320058	122320526	+	4	-45717	ALU-REF_311	5	122274341	122274341	83	83.8754	1.00007	4.0325	3.02819e-05	-0.160166	0.00019998	0.000110737	ALU
110671	5	122321754	122322521	+	4	-47413	ALU-REF_311	5	122274341	122274341	83	83.308	1.00006	4.04896	5.06872e-07	-0.13522	9.999e-05	1.95293e-06	ALU
110672	5	122335526	122336137	+	4	-61185	ALU-REF_311	5	122274341	122274341	83	84.8643	0.999975	4.13378	7.88957e-08	-0.18707	9.999e-05	2.33107e-07	ALU
110904	5	124145393	124146556	+	2	217280	ALU-REF_312	5	124363836	124363836	83	83.0486	0.999948	2.01303	2.49161e-05	-0.150663	0.00029997	4.99072e-05	ALU
111167	5	126066497	126067376	+	1	-1361	SVA-NREF_44	5	126065136	126065136	83	81.7518	0.999955	0.997578	9.16488e-06	0.189043	9.999e-05	1.069e-05	SVA
111910	5	130580816	130581479	+	1	271779	ALU-NREF_903	5	130853258	130853258	83	84.0375	1.00004	1.0019	0.00012102	-0.127026	9.999e-05	0.000109837	ALU
111951	5	130691539	130692229	+	1	161029	ALU-NREF_903	5	130853258	130853258	83	82.0598	0.999928	0.991397	5.1584e-07	0.129016	9.999e-05	5.94145e-07	ALU
111993	5	130861321	130862526	+	1	-8063	ALU-NREF_903	5	130853258	130853258	83	83.6484	0.999948	1.0071	2.56821e-07	0.163259	9.999e-05	2.32356e-07	ALU
112310	5	133439617	133440194	+	3	-505519	L1-NREF_106	5	132934098	132934098	83	83.616	0.999974	2.98827	2.43247e-05	-0.310764	9.999e-05	6.77975e-05	L1
112851	5	139520014	139520757	+	1	74381	ALU-NREF_908	5	139595138	139595138	83	82.692	0.999983	1.00268	1.00773e-05	-0.274148	9.999e-05	1.04988e-05	ALU
112866	5	139594304	139594862	+	1	276	ALU-NREF_908	5	139595138	139595138	83	83.9889	1.00005	1.01826	3.85719e-06	-0.158004	9.999e-05	3.43502e-06	ALU
113104	5	141757926	141758969	+	2	0	ALU-NREF_910	5	141758655	141758655	83	82.9027	1	1.98384	2.75883e-19	-0.43612	9.999e-05	5.7421e-19	ALU
113105	5	141759705	141760328	+	2	-1050	ALU-NREF_910	5	141758655	141758655	83	81.541	1.00009	1.97715	2.17646e-13	-0.216342	9.999e-05	6.96875e-13	ALU
113882	5	148065106	148065654	+	3	31126	ALU-NREF_923	5	148096780	148096780	83	82.157	0.999949	2.98793	6.23406e-06	-0.334297	9.999e-05	2.07837e-05	ALU
114331	5	150992339	150993158	+	3	-5850	ALU-NREF_926	5	150986489	150986489	83	82.2705	1.00006	2.98539	8.59629e-11	-0.398282	9.999e-05	3.10013e-10	ALU
114444	5	151841542	151842470	+	5	-80631	ALU-REF_318	5	151760911	151760911	83	82.9027	0.999993	4.91014	4.59282e-07	0.24009	9.999e-05	2.29067e-06	ALU
114506	5	152566888	152567771	+	3	-37150	ALU-NREF_928	5	152529738	152529738	83	83.9564	0.999922	2.9155	4.67011e-07	-0.336239	9.999e-05	1.17018e-06	ALU
116665	5	168971189	168971710	+	3	-59256	ALU-NREF_942	5	168911933	168911933	83	84.4104	1.00005	3.08627	9.68142e-06	-0.329443	9.999e-05	2.50679e-05	ALU
117624	5	180402118	180402955	+	2	-52514	ALU-NREF_949	5	180349604	180349604	83	82.8541	1.00001	1.96673	2.69087e-06	-0.84167	9.999e-05	5.40011e-06	ALU
117625	5	180403680	180403856	+	2	-54076	ALU-NREF_949	5	180349604	180349604	83	82.8055	1.00001	2.03148	7.44152e-05	-0.573601	0.00039996	0.000154133	ALU
117626	5	180417009	180418063	+	2	-67405	ALU-NREF_949	5	180349604	180349604	83	82.2705	1.00003	2.03684	2.38508e-05	-0.694457	9.999e-05	5.27639e-05	ALU
148336	7	91569795	91570602	+	1	180950	ALU-NREF_1267	7	91751552	91751552	83	81.4113	1	0.996612	6.38856e-07	-0.047618	9.999e-05	8.15648e-07	ALU
148342	7	91582874	91583480	+	1	168072	ALU-NREF_1267	7	91751552	91751552	83	84.3779	1.00007	1.00269	4.1175e-05	-0.175464	0.00019998	3.55838e-05	ALU
148964	7	96901441	96902107	+	3	-6709	ALU-REF_439	7	96894732	96894732	83	85.0912	1.00002	3.03202	3.48652e-08	0.430012	9.999e-05	7.10331e-08	ALU
149562	7	104597410	104598195	+	6	297394	ALU-NREF_1273	7	104895589	104895589	83	82.7244	1.00007	5.97771	1.20394e-05	-0.0931291	9.999e-05	7.43681e-05	ALU
149607	7	104896515	104898222	+	5	-926	ALU-NREF_1273	7	104895589	104895589	83	83	0.999909	4.94652	1.72208e-16	-0.523823	9.999e-05	8.54559e-16	ALU
150253	7	110246965	110247772	+	2	-963613	ALU-NREF_1279	7	109283352	109283352	83	82.5947	1	1.98086	3.87365e-05	-0.131052	0.00029997	8.0165e-05	ALU
151293	7	115864434	115865250	+	3	0	ALU-NREF_1283	7	115865235	115865235	83	83.4215	1.00002	2.98842	2.39207e-09	-0.193412	9.999e-05	6.50887e-09	ALU
151312	7	115956808	115957780	+	2	-91573	ALU-NREF_1283	7	115865235	115865235	83	85.7559	1.00001	2.04069	7.6214e-05	-0.100787	0.00049995	0.000117979	ALU
151691	7	117964765	117966255	+	2	-70814	ALU-REF_451	7	117893951	117893951	83	81.5086	1.00008	2.00478	2.17206e-06	0.143622	0.00019998	5.37301e-06	ALU
153051	7	124545797	124546461	+	1	46563	ALU-NREF_1294	7	124593024	124593024	83	80.2441	1.00006	0.978287	3.30332e-05	-0.193089	9.999e-05	4.37358e-05	ALU
153069	7	124636671	124637403	+	1	-43647	ALU-NREF_1294	7	124593024	124593024	83	82.9514	1.00001	0.991222	3.34411e-10	-0.482666	9.999e-05	3.3535e-10	ALU
153297	7	126051126	126052350	+	3	-177245	ALU-NREF_1295	7	125873881	125873881	83	84.4914	1.00007	3.03891	2.9513e-06	0.241402	9.999e-05	7.29449e-06	ALU
153633	7	127743605	127744903	+	4	-123450	ALU-REF_456	7	127620155	127620155	83	84.2807	0.999963	3.77509	9.9742e-07	-0.145946	9.999e-05	3.10631e-06	ALU
153634	7	127748640	127749501	+	4	16914	ALU-REF_459	7	127766415	127766415	83	83.9889	1.00008	3.75256	1.29887e-05	0.069773	9.999e-05	4.32216e-05	ALU
153678	7	128114246	128114605	+	4	94561	ALU-NREF_1298	7	128209166	128209166	83	84.3455	1.00003	3.77572	2.61498e-05	0.222707	9.999e-05	8.4826e-05	ALU
154759	7	138729912	138730355	+	3	11914	ALU-REF_465	7	138742269	138742269	83	81.6383	1.00006	2.98262	4.47446e-07	-0.257047	9.999e-05	1.65829e-06	ALU
154995	7	141016740	141017418	+	2	-3150	ALU-NREF_1312	7	141013590	141013590	83	85.6748	1.00005	1.98096	5.49734e-05	0.234766	0.00029997	8.24202e-05	ALU
156452	7	154796033	154796573	+	4	61647	ALU-NREF_1318	7	154858220	154858220	83	83.3566	1.00003	4.02967	3.2084e-10	-0.338865	9.999e-05	1.18387e-09	ALU
156752	7	157312842	157313530	+	2	37264	ALU-NREF_1320	7	157350794	157350794	83	84.0213	1.00003	1.91812	8.9523e-05	0.543727	0.00039996	0.000155243	ALU
196470	11	7071326	7071936	+	6	20864	ALU-NREF_1769	11	7092800	7092800	83	85.4641	0.985442	6.09188	1.63125e-05	0.311756	0.00039996	8.57436e-05	ALU
196532	11	7613015	7613784	+	6	-318	ALU-NREF_1774	11	7612697	7612697	83	82.3029	1.01338	5.99673	1.3233e-22	0.524638	9.999e-05	6.23614e-22	ALU
196644	11	8854133	8854966	+	5	32351	ALU-NREF_1777	11	8887317	8887317	83	81.4924	0.999956	4.81309	4.00559e-07	-0.219694	0.00019998	2.46043e-06	ALU
198290	11	26155642	26155966	+	6	884016	ALU-NREF_1806	11	27039982	27039982	83	83.3891	0.996421	5.55912	2.66257e-05	-0.245746	0.00039996	0.000146413	ALU
198809	11	31128418	31129057	+	2	23377	ALU-REF_625	11	31152434	31152434	83	82.3191	0.999913	1.98908	2.21239e-06	-0.170997	9.999e-05	4.85053e-06	ALU
198918	11	32280960	32281676	+	6	4965	ALU-REF_627	11	32286641	32286641	83	82.0273	1.00007	5.46173	1.09103e-06	-0.20204	9.999e-05	6.88665e-06	ALU
198952	11	32551613	32552285	+	6	-117335	ALU-NREF_1809	11	32434278	32434278	83	83.2756	0.999915	5.54547	3.47634e-06	-0.357436	9.999e-05	1.8586e-05	ALU
199462	11	36521796	36522479	+	2	36011	L1-NREF_206	11	36558490	36558490	83	80.7953	1.00002	1.93841	1.00816e-07	-0.237999	9.999e-05	2.88999e-07	L1
199486	11	36764145	36765073	+	4	-205655	L1-NREF_206	11	36558490	36558490	83	84.4104	1.00002	3.98506	2.19026e-05	-0.222367	0.00029997	7.42339e-05	L1
200215	11	47338544	47339442	+	1	780620	ALU-REF_635	11	48120062	48120062	83	87.1014	1.00003	1.00879	2.40134e-05	0.349745	9.999e-05	1.52025e-05	ALU
200311	11	48021218	48021658	+	1	98404	ALU-REF_635	11	48120062	48120062	83	83.308	0.999971	1.00392	1.9934e-05	-0.230338	9.999e-05	1.93172e-05	ALU
200341	11	48102591	48103661	+	1	16401	ALU-REF_635	11	48120062	48120062	83	81.5896	1.00006	0.990582	1.35964e-07	0.339398	9.999e-05	1.72007e-07	ALU
202471	11	77170647	77171175	+	1	-180062	ALU-NREF_1844	11	76990585	76990585	83	83.4701	1.00007	0.99246	9.06073e-05	0.550588	9.999e-05	8.5808e-05	ALU
203423	11	87912182	87912907	+	2	5638	ALU-REF_640	11	87918545	87918545	83	84.2969	1.00002	2.02495	1.90668e-05	0.10467	0.00019998	3.31965e-05	ALU
203424	11	87913251	87913436	+	2	5109	ALU-REF_640	11	87918545	87918545	83	83.4215	1.00004	2.03621	5.7444e-19	0.501093	9.999e-05	9.51592e-19	ALU
203425	11	87926221	87926911	+	2	-7676	ALU-REF_640	11	87918545	87918545	83	82.6596	1.00007	2.02699	5.17242e-05	0.16878	0.00029997	0.000108576	ALU
203426	11	87928080	87928622	+	2	-9535	ALU-REF_640	11	87918545	87918545	83	83.1459	1	1.96517	5.10838e-14	0.478506	9.999e-05	9.5397e-14	ALU
203605	11	89951881	89952777	+	2	-19367	ALU-REF_642	11	89932514	89932514	83	82.1732	0.999966	2.0195	4.77804e-06	0.121424	9.999e-05	1.07697e-05	ALU
203620	11	90055893	90056754	+	2	473969	ALU-NREF_1852	11	90530723	90530723	83	81.7193	1.00004	1.95291	5.63947e-06	-0.28491	9.999e-05	1.30106e-05	ALU
204138	11	95070450	95071249	+	2	98121	L1-REF_80	11	95169370	95169370	83	85.4154	1.00007	1.95488	4.99117e-05	0.0828065	9.999e-05	7.56407e-05	L1
204143	11	95176458	95177124	+	2	-7088	L1-REF_80	11	95169370	95169370	83	85.075	1.00007	2.02882	4.79563e-06	-0.318433	0.00019998	7.38759e-06	L1
204338	11	96629002	96630436	+	2	-14242	ALU-REF_646	11	96614760	96614760	83	82.2867	0.999978	1.99576	2.38444e-06	-0.158046	9.999e-05	5.26183e-06	ALU
204751	11	100781395	100782083	+	4	73035	ALU-NREF_1860	11	100855118	100855118	83	84.0699	1.00005	3.92362	7.99556e-07	-0.190445	9.999e-05	2.66121e-06	ALU
204916	11	102165733	102166350	+	5	3422	ALU-NREF_1865	11	102169772	102169772	83	82.692	1.00005	4.97506	6.84527e-07	-0.171433	9.999e-05	3.56966e-06	ALU
204941	11	102231923	102232744	+	5	-62151	ALU-NREF_1865	11	102169772	102169772	83	84.6859	1	4.99998	2.88984e-06	0.182255	9.999e-05	1.14459e-05	ALU
204969	11	102344976	102345861	+	5	2465	ALU-NREF_1866	11	102348326	102348326	83	82.2219	1.00011	4.85054	2.49872e-05	0.0809345	0.00019998	0.000132217	ALU
204972	11	102358796	102359513	+	5	-10470	ALU-NREF_1866	11	102348326	102348326	83	81.2979	0.999974	4.90508	6.10189e-10	-0.176146	9.999e-05	4.4889e-09	ALU
205166	11	103676767	103677341	+	3	59034	ALU-NREF_1871	11	103736375	103736375	83	82.4813	1.00009	3.01616	1.19066e-05	0.53766	0.00019998	3.8219e-05	ALU
205300	11	104674414	104675070	+	4	-118284	L1-NREF_216	11	104556130	104556130	83	82.9189	0.999939	4.00429	1.26471e-05	0.329928	9.999e-05	5.11731e-05	L1
205315	11	104768468	104769363	+	4	17245	ALU-NREF_1874	11	104786608	104786608	83	83.3566	0.999925	4.03698	3.38907e-05	0.346918	0.00029997	0.000131654	ALU
205909	11	110314243	110314792	+	2	63102	L1-NREF_218	11	110377894	110377894	83	82.3678	1.00004	2.01543	3.37546e-05	-0.404548	0.00019998	7.28866e-05	L1
206362	11	117172854	117173395	+	1	510111	ALU-NREF_1883	11	117683506	117683506	83	84.2969	0.999984	0.998423	0.000108614	-0.184568	0.00019998	9.57408e-05	ALU
207039	11	124906623	124907584	+	2	-76484	ALU-REF_654	11	124830139	124830139	83	80.39	0.999954	1.96459	5.07748e-14	0.430938	9.999e-05	2.4866e-13	ALU
207475	11	129723138	129724570	+	3	34986	ALU-NREF_1891	11	129759556	129759556	83	83.7943	1.00002	2.9602	5.02524e-05	0.145007	0.00029997	0.000136819	ALU
166068	8	90573281	90574018	+	2	95887	ALU-NREF_1421	8	90669905	90669905	83	83.4863	1.00006	1.99559	5.60001e-06	0.113798	9.999e-05	1.04804e-05	ALU
166205	8	91121622	91122490	+	2	-52448	ALU-REF_504	8	91069174	91069174	83	82.1084	0.999997	1.97747	6.2917e-05	0.19666	9.999e-05	0.000136325	ALU
166881	8	95845614	95846302	+	5	225943	ALU-NREF_1425	8	96072245	96072245	83	84.767	0.999913	5.11827	5.96561e-08	0.902635	9.999e-05	2.21028e-07	ALU
167088	8	98445662	98446835	+	2	-245519	ALU-REF_505	8	98200143	98200143	83	84.7184	0.999946	1.9934	7.84481e-05	0.294621	0.00039996	0.00013177	ALU
168815	8	110462933	110463667	+	5	-92047	ALU-NREF_1447	8	110370886	110370886	83	84.0537	1.00008	4.48476	1.82703e-07	0.263111	9.999e-05	6.83846e-07	ALU
168824	8	110533592	110534013	+	5	-23284	ALU-REF_517	8	110510308	110510308	83	84.1186	1.00008	4.4624	6.05821e-11	-1.01916	9.999e-05	2.00593e-10	ALU
169379	8	113687578	113688554	+	2	-779625	ALU-NREF_1451	8	112907953	112907953	83	82.8865	1.00001	1.96376	2.94581e-05	-0.316193	0.00029997	5.85772e-05	ALU
170320	8	119446549	119447669	+	4	0	ALU-REF_524	8	119447045	119447045	83	82.0436	1.00008	3.87266	5.11145e-09	-0.422432	9.999e-05	2.42253e-08	ALU
170573	8	121663432	121664371	+	3	17302	ALU-REF_525	8	121681673	121681673	83	84.0213	0.999941	2.99031	3.9556e-06	-0.399686	9.999e-05	1.0317e-05	ALU
171197	8	126691341	126693069	+	2	-9965	L1-REF_72	8	126681376	126681376	83	84.6697	1.00002	2.01656	1.62412e-07	0.214164	9.999e-05	2.4574e-07	L1
171844	8	131518612	131519189	+	7	858699	ALU-NREF_1480	8	132377888	132377888	83	82.1246	0.995157	6.85039	1.91995e-05	0.42812	0.00029997	0.000152227	ALU
171930	8	132931418	132931924	+	4	10800	ALU-NREF_1482	8	132942724	132942724	83	82.2219	1.00007	3.88876	8.70496e-10	0.631717	9.999e-05	4.0543e-09	ALU
172149	8	135023036	135023802	+	1	-50794	L1-NREF_184	8	134972242	134972242	83	85.075	0.999973	1.0229	4.37157e-09	0.677843	9.999e-05	2.86729e-09	L1
208370	12	8601938	8602732	+	4	22847	ALU-REF_658	12	8625579	8625579	83	85.383	0.999926	4.01648	4.57636e-06	-0.169317	9.999e-05	1.34056e-05	ALU
208466	12	9870094	9870541	+	3	621	ALU-NREF_1906	12	9871162	9871162	83	82.465	1.00008	3.02656	3.24463e-12	0.222195	9.999e-05	1.15065e-11	ALU
208549	12	10696123	10696541	+	5	6947	ALU-REF_659	12	10703488	10703488	83	82.6434	0.999942	4.83349	3.08325e-12	-0.994018	9.999e-05	1.6613e-11	ALU
208578	12	11227993	11228724	+	4	29801	ALU-REF_660	12	11258525	11258525	83	83.3242	1.00006	3.94225	5.38962e-20	1.34255	9.999e-05	1.7942e-19	ALU
208579	12	11237915	11238596	+	3	19929	ALU-REF_660	12	11258525	11258525	83	84.0699	1.00002	2.98519	5.91189e-21	1.42432	9.999e-05	9.89399e-21	ALU
208739	12	12560991	12561784	+	3	48011	ALU-NREF_1911	12	12609795	12609795	83	81.4762	1.0001	2.92094	6.08499e-07	-0.247266	9.999e-05	2.25308e-06	ALU
208989	12	15073515	15074586	+	3	30061	ALU-NREF_1920	12	15104647	15104647	83	83.3891	0.999972	2.99927	4.16854e-07	-0.307359	9.999e-05	1.17487e-06	ALU
209440	12	19454741	19455702	+	3	350520	ALU-NREF_1927	12	19806222	19806222	83	84.1023	0.999918	2.97404	6.43169e-06	0.178642	0.00019998	1.66099e-05	ALU
209459	12	19604022	19604777	+	4	-852418	ALU-NREF_1925	12	18751604	18751604	83	82.8379	0.999962	3.91679	2.1487e-05	0.34576	0.00039996	8.57719e-05	ALU
209734	12	22090095	22090752	+	1	-4140	ALU-NREF_1930	12	22085955	22085955	83	84.9129	0.999961	1.02076	3.8778e-05	0.201169	0.00019998	3.2206e-05	ALU
210485	12	28405925	28406739	+	5	-131334	ALU-NREF_1938	12	28274591	28274591	83	84.54	0.999996	5.06371	2.20605e-08	-0.287646	9.999e-05	8.26909e-08	ALU
210654	12	30480712	30481880	+	5	-9643	ALU-NREF_1944	12	30471069	30471069	83	81.5248	0.9999	4.80949	3.31977e-07	-0.155805	9.999e-05	2.03514e-06	ALU
211360	12	40657731	40658187	+	2	14840	ALU-NREF_1953	12	40673027	40673027	83	82.2057	1.00002	1.8886	7.97014e-06	-0.160181	9.999e-05	1.66383e-05	ALU
212278	12	48882717	48883372	+	2	45691	L1-NREF_225	12	48929063	48929063	83	85.2047	1.00004	2.02179	1.93019e-05	0.334382	9.999e-05	3.01987e-05	L1
215153	12	75339393	75340457	+	1	-18702	ALU-NREF_2006	12	75320691	75320691	83	83.6971	0.999943	1.0032	1.43874e-05	-0.230019	9.999e-05	1.32879e-05	ALU
215448	12	77307900	77308826	+	3	2936	ALU-NREF_2009	12	77311762	77311762	83	80.4549	1.0001	2.86585	1.56188e-10	0.494018	9.999e-05	8.52552e-10	ALU
215548	12	77993487	77994393	+	4	-28431	ALU-NREF_2010	12	77965056	77965056	83	82.8865	1.00003	3.85108	6.19328e-09	0.220707	9.999e-05	2.4414e-08	ALU
215565	12	78078804	78079403	+	5	-113748	ALU-NREF_2010	12	77965056	77965056	83	82.3678	1.0001	4.86	6.97178e-06	0.115509	9.999e-05	3.66987e-05	ALU
216074	12	81017427	81018510	+	1	296723	ALU-NREF_2014	12	81315233	81315233	83	82.6434	0.999932	0.979451	8.34982e-05	-0.134858	0.00049995	8.47834e-05	ALU
216699	12	84217243	84217924	+	6	266561	ALU-REF_677	12	84484485	84484485	83	82.1246	0.999989	4.98017	7.21781e-06	-0.269487	9.999e-05	4.01982e-05	ALU
217943	12	91956037	91956878	+	1	-113829	ALU-NREF_2025	12	91842208	91842208	83	84.1996	1.00004	1.00906	2.02254e-15	0.409201	9.999e-05	1.27997e-15	ALU
219493	12	107065066	107066051	+	1	56035	ALU-NREF_2036	12	107122086	107122086	83	83.3891	1	0.990231	5.11738e-08	-0.323371	9.999e-05	4.71457e-08	ALU
219850	12	111792826	111793760	+	1	983371	ALU-NREF_2042	12	112777131	112777131	83	80.6008	1.00002	0.998746	1.91545e-07	0.262112	9.999e-05	2.87627e-07	ALU
219899	12	112267360	112267936	+	1	509195	ALU-NREF_2042	12	112777131	112777131	83	84.848	1.00006	0.999293	0.000104175	-0.380525	0.00029997	8.70264e-05	ALU
219916	12	112517130	112518220	+	1	258911	ALU-NREF_2042	12	112777131	112777131	83	85.6424	0.999994	1.02292	3.24809e-05	0.239299	0.00019998	2.48428e-05	ALU
219937	12	112785204	112785857	+	1	-8073	ALU-NREF_2042	12	112777131	112777131	83	82.157	1.00007	0.990989	4.05269e-07	0.242786	9.999e-05	4.59611e-07	ALU
220588	12	122896736	122897779	+	1	112560	ALU-REF_687	12	123010339	123010339	83	83.4701	0.999928	1.00233	9.23842e-05	-0.145052	0.00029997	8.84868e-05	ALU
221598	13	21898859	21899496	+	5	-4079	ALU-NREF_2069	13	21894780	21894780	83	82.6271	0.999946	4.97302	4.57551e-06	-0.207018	0.00019998	2.39239e-05	ALU
221632	13	22190162	22190757	+	6	-1668	ALU-NREF_2070	13	22188494	22188494	83	81.7355	1.01818	6.08217	2.10532e-15	-0.878304	9.999e-05	1.17122e-14	ALU
222648	13	34088389	34089135	+	1	649831	ALU-NREF_2088	13	34738966	34738966	83	80.4063	1.00002	0.983253	9.88758e-05	-0.183423	9.999e-05	0.000125128	ALU
223382	13	42569974	42570592	+	3	968	ALU-NREF_2096	13	42571560	42571560	83	85.2371	1.00004	3.0373	5.57977e-08	0.424268	9.999e-05	1.12107e-07	ALU
223401	13	42726574	42727132	+	3	0	ALU-NREF_2097	13	42726801	42726801	83	84.1672	1.00008	3.04774	5.12719e-14	-0.580112	9.999e-05	1.03715e-13	ALU
223414	13	42902709	42903371	+	3	-175908	ALU-NREF_2097	13	42726801	42726801	83	84.0375	1.00005	2.92662	3.21274e-06	0.325064	9.999e-05	8.15175e-06	ALU
223678	13	46262726	46263379	+	3	4700	ALU-NREF_2100	13	46268079	46268079	83	82.6434	1.00005	2.99326	2.48802e-05	0.179418	9.999e-05	7.75031e-05	ALU
223681	13	46270851	46271486	+	3	-2772	ALU-NREF_2100	13	46268079	46268079	83	83.2432	0.999979	2.98481	3.50511e-15	0.263819	9.999e-05	9.5423e-15	ALU
224110	13	50183051	50183451	+	3	-9680	ALU-NREF_2104	13	50173371	50173371	83	82.3029	0.999973	2.86086	5.88687e-06	-0.153051	9.999e-05	1.84441e-05	ALU
224111	13	50194168	50194841	+	3	-20797	ALU-NREF_2104	13	50173371	50173371	83	82.692	0.99999	2.96839	4.3613e-09	-0.803731	9.999e-05	1.38328e-08	ALU
224484	13	54603192	54603894	+	1	2635	ALU-NREF_2108	13	54606529	54606529	83	82.7082	0.999994	1.00267	7.98597e-10	-0.582106	9.999e-05	8.57574e-10	ALU
224629	13	57992140	57992923	+	3	-16639	ALU-REF_716	13	57975501	57975501	83	82.9189	1.00002	2.99642	3.15394e-05	-0.273987	0.00019998	9.53384e-05	ALU
224806	13	60011780	60012483	+	5	20078	ALU-NREF_2114	13	60032561	60032561	83	83.7781	0.999912	5.01537	4.02622e-07	0.387235	9.999e-05	1.7833e-06	ALU
224807	13	60014404	60015706	+	5	16855	ALU-NREF_2114	13	60032561	60032561	83	84.459	0.999979	5.08201	5.80797e-06	0.310043	9.999e-05	2.442e-05	ALU
224982	13	61164799	61165942	+	3	-2327	ALU-NREF_2117	13	61162472	61162472	83	84.0051	0.999984	2.99497	1.01348e-08	0.482855	9.999e-05	2.47203e-08	ALU
225416	13	64651175	64651706	+	1	312829	ALU-NREF_2122	13	64964535	64964535	83	86.1773	0.999997	1.01208	0.000136935	0.275587	0.00079992	0.000102985	ALU
227431	13	78384437	78385092	+	2	199579	ALU-NREF_2137	13	78584671	78584671	83	85.2209	1.00005	1.86295	1.19855e-06	0.208404	9.999e-05	1.60461e-06	ALU
228465	13	87162698	87163522	+	6	-7513	ALU-REF_726	13	87155185	87155185	83	81.3465	1.00611	5.64388	2.38007e-08	-0.426901	9.999e-05	1.68198e-07	ALU
229492	13	95253686	95254548	+	1	-4169	ALU-NREF_2173	13	95249517	95249517	83	81.9139	1.00004	0.99772	1.34093e-07	0.0396707	9.999e-05	1.61554e-07	ALU
230457	13	101910264	101910961	+	3	-3320	ALU-REF_730	13	101906944	101906944	83	83.3729	0.999955	2.98687	4.90805e-20	0.571235	9.999e-05	1.21232e-19	ALU
230458	13	101914540	101915269	+	3	-7596	ALU-REF_730	13	101906944	101906944	83	84.0861	0.999954	3.06787	1.46656e-06	0.227938	9.999e-05	3.84119e-06	ALU
231888	13	111299874	111300350	+	2	26417	ALU-NREF_2187	13	111326767	111326767	83	81.6707	0.999962	1.98189	1.39927e-05	0.27006	9.999e-05	3.25377e-05	ALU
232089	13	113527152	113527964	+	2	-6185	ALU-NREF_2189	13	113520967	113520967	83	85.2371	0.999923	2.01692	1.32178e-06	0.163058	9.999e-05	1.9195e-06	ALU
232197	13	114883941	114884552	+	1	-1920	ALU-NREF_2190	13	114882021	114882021	83	81.8328	0.999989	0.994191	5.19802e-05	-0.272885	9.999e-05	5.84049e-05	ALU
233022	14	31459944	31460899	+	4	-15635	ALU-NREF_2197	14	31444309	31444309	83	83.2432	0.999973	3.99348	2.23643e-05	-0.188362	9.999e-05	8.68801e-05	ALU
233030	14	31502010	31502676	+	4	-57701	ALU-NREF_2197	14	31444309	31444309	83	82.2057	1.00004	3.97554	5.45592e-09	-0.252869	9.999e-05	2.56496e-08	ALU
233079	14	31979319	31979870	+	3	-535010	ALU-NREF_2197	14	31444309	31444309	83	81.6383	0.999985	2.98254	6.74984e-07	0.27034	9.999e-05	2.48767e-06	ALU
233177	14	33407185	33407880	+	3	27901	ALU-REF_740	14	33435781	33435781	83	83.308	1.00008	3.03696	5.22039e-10	0.330351	9.999e-05	1.47024e-09	ALU
233323	14	35399678	35400830	+	2	573	ALU-REF_741	14	35401403	35401403	83	86.4691	0.999958	2.06184	2.11862e-09	-0.143371	9.999e-05	2.01741e-09	ALU
233720	14	40528221	40529105	+	5	50580	ALU-NREF_2206	14	40579685	40579685	83	83.8754	1	4.93572	4.46279e-06	0.341663	9.999e-05	1.96031e-05	ALU
233722	14	40588639	40589503	+	5	-8954	ALU-NREF_2206	14	40579685	40579685	83	84.7021	0.999902	4.89854	1.37216e-08	0.300212	9.999e-05	4.78254e-08	ALU
233723	14	40589763	40589945	+	5	-10078	ALU-NREF_2206	14	40579685	40579685	83	82.8055	0.999942	4.85281	4.40715e-09	0.365007	9.999e-05	2.23211e-08	ALU
233724	14	40592018	40592898	+	5	-12333	ALU-NREF_2206	14	40579685	40579685	83	84.232	1.00011	4.89569	1.3146e-12	0.371593	9.999e-05	4.37714e-12	ALU
234383	14	51561582	51562308	+	2	156692	ALU-NREF_2218	14	51719000	51719000	83	81.8652	1.00003	2.00267	1.19257e-05	0.0817437	9.999e-05	2.74129e-05	ALU
234407	14	51761564	51762218	+	4	-42564	ALU-NREF_2218	14	51719000	51719000	83	82.7244	1.00007	3.97776	3.58082e-05	-0.177261	0.00019998	0.000146684	ALU
235128	14	60686699	60687353	+	2	54047	ALU-NREF_2238	14	60741400	60741400	83	81.8328	1.00008	2.01043	2.68467e-05	0.0994947	9.999e-05	6.14905e-05	ALU
235138	14	60739866	60741350	+	2	50	ALU-NREF_2238	14	60741400	60741400	83	82.9676	0.999977	2.01744	4.47174e-05	-0.163544	0.00019998	9.0544e-05	ALU
235754	14	67116047	67116725	+	2	-305417	ALU-REF_756	14	66810630	66810630	83	81.7031	1.00005	1.98076	5.75749e-05	0.195609	0.00049995	0.000130369	ALU
235755	14	67117213	67117806	+	2	-306583	ALU-REF_756	14	66810630	66810630	83	82.5947	1.00005	1.98363	6.31291e-08	0.462687	9.999e-05	1.34749e-07	ALU
235822	14	68548061	68548694	+	2	-171056	ALU-REF_757	14	68377005	68377005	83	82.9352	1.00004	1.98394	4.76186e-07	0.388909	9.999e-05	9.54051e-07	ALU
236162	14	71633141	71633637	+	3	-152857	ALU-NREF_2250	14	71480284	71480284	83	82.773	0.999921	3.00305	3.35137e-11	-0.439024	9.999e-05	1.07253e-10	ALU
236341	14	74003712	74004723	+	2	181823	ALU-NREF_2252	14	74186546	74186546	83	82.8541	0.99997	2.02486	6.66254e-05	-0.700888	0.00029997	0.000136959	ALU
236342	14	74005647	74006349	+	2	180197	ALU-NREF_2252	14	74186546	74186546	83	82.7082	0.999918	2.00911	7.00435e-05	-0.663358	9.999e-05	0.000145048	ALU
236473	14	75625601	75626407	+	2	-126020	ALU-NREF_2254	14	75499581	75499581	83	83.0486	1.00002	2.03418	5.02747e-14	0.297026	9.999e-05	1.00491e-13	ALU
236759	14	78280127	78280317	+	6	-236599	ALU-NREF_2259	14	78043528	78043528	83	82.384	1.01251	5.47202	8.69435e-06	0.874723	9.999e-05	4.52338e-05	ALU
237927	14	93999778	94000765	+	1	-168837	ALU-NREF_2266	14	93830941	93830941	83	82.1895	0.999937	0.98973	5.15417e-07	0.166684	9.999e-05	5.80535e-07	ALU
238537	14	102435720	102436377	+	1	-444853	ALU-REF_765	14	101990867	101990867	83	83.9889	0.999944	0.998824	5.47037e-05	-0.183824	0.00029997	4.93227e-05	ALU
239734	15	34689945	34690662	+	3	51078	ALU-REF_769	15	34741740	34741740	83	84.6373	1.00001	3.03691	6.34506e-06	-0.366953	9.999e-05	1.55972e-05	ALU
239739	15	34815826	34816670	+	3	-74086	ALU-REF_769	15	34741740	34741740	83	82.5947	1	2.96033	3.67766e-07	0.494752	9.999e-05	1.16268e-06	ALU
239740	15	34836193	34836899	+	3	-94453	ALU-REF_769	15	34741740	34741740	83	84.5887	0.999933	2.99542	5.73148e-08	0.697262	9.999e-05	1.28282e-07	ALU
239741	15	34842509	34843314	+	3	-100769	ALU-REF_769	15	34741740	34741740	83	84.2969	1.00005	3.04517	1.10989e-05	0.285815	9.999e-05	2.88177e-05	ALU
239742	15	34847281	34847796	+	3	-105541	ALU-REF_769	15	34741740	34741740	83	85.5938	0.999976	3.02986	9.91034e-08	0.767564	9.999e-05	1.89482e-07	ALU
239771	15	35473674	35474186	+	3	-41	ALU-NREF_2286	15	35473633	35473633	83	83.5188	1.00009	2.97416	1.24834e-06	-0.198203	9.999e-05	3.43432e-06	ALU
240002	15	39721965	39722697	+	4	53875	ALU-NREF_2293	15	39776572	39776572	83	81.541	0.999978	3.85275	1.00211e-05	0.242643	0.00019998	4.62625e-05	ALU
240118	15	40856890	40857632	+	2	242700	ALU-NREF_2296	15	41100332	41100332	83	84.3617	0.999973	1.99418	5.6148e-05	-0.0399103	9.999e-05	9.7236e-05	ALU
240681	15	49545270	49546294	+	2	63310	ALU-NREF_2299	15	49609604	49609604	83	81.6545	1.00005	1.96607	6.44873e-11	-0.784837	9.999e-05	1.80768e-10	ALU
240839	15	51912860	51913145	+	3	-15158	ALU-REF_773	15	51897702	51897702	83	84.8643	0.999916	3.02732	1.44768e-16	0.863559	9.999e-05	2.01205e-16	ALU
241551	15	62236040	62236756	+	4	81524	ALU-NREF_2318	15	62318280	62318280	83	82.8865	0.999938	3.93337	7.1109e-06	-0.321818	9.999e-05	2.83968e-05	ALU
241553	15	62318887	62319743	+	5	-607	ALU-NREF_2318	15	62318280	62318280	83	84.9777	0.999989	5.10303	1.58911e-13	-0.440486	9.999e-05	4.17616e-13	ALU
241555	15	62339417	62340045	+	4	-21137	ALU-NREF_2318	15	62318280	62318280	83	83.7457	0.999912	3.97336	1.02385e-05	-0.113846	0.00019998	3.71364e-05	ALU
241973	15	67294651	67295078	+	3	0	ALU-NREF_2327	15	67294860	67294860	83	82.2057	0.999922	2.96549	5.13453e-06	-0.333005	9.999e-05	1.69185e-05	ALU
242277	15	70888631	70889331	+	2	-49052	SVA-NREF_93	15	70839579	70839579	83	83.4377	0.999962	1.98427	7.79429e-05	0.278839	9.999e-05	0.00014808	SVA
242360	15	72928989	72929798	+	1	-289438	ALU-NREF_2332	15	72639551	72639551	83	85.1236	1.00005	1.01545	8.26651e-06	0.350302	0.00019998	6.42052e-06	ALU
242670	15	76632164	76633776	+	2	192243	ALU-NREF_2335	15	76826019	76826019	83	83.8916	0.999965	2.01268	1.30521e-05	-0.163959	9.999e-05	2.35989e-05	ALU
242681	15	77157747	77158641	+	3	-331728	ALU-NREF_2335	15	76826019	76826019	83	82.8703	1.00002	2.88095	4.26896e-05	-0.247013	0.00019998	0.000124677	ALU
242707	15	77375990	77376641	+	3	384956	ALU-NREF_2337	15	77761597	77761597	83	84.0051	1.00004	2.96709	2.79895e-06	0.15963	9.999e-05	7.22166e-06	ALU
242713	15	77465727	77466373	+	3	295224	ALU-NREF_2337	15	77761597	77761597	83	82.2543	1.00003	2.89163	2.13871e-06	0.315541	9.999e-05	6.87175e-06	ALU
242733	15	77779417	77780373	+	3	-17820	ALU-NREF_2337	15	77761597	77761597	83	84.4428	0.999909	2.96678	1.26168e-05	0.281659	0.00019998	3.14632e-05	ALU
242837	15	79052341	79052934	+	5	-115670	ALU-NREF_2340	15	78936671	78936671	83	82.8865	1.00004	4.5402	3.5719e-06	-0.157746	9.999e-05	1.64617e-05	ALU
242889	15	79965700	79966592	+	5	-54113	ALU-REF_778	15	79911587	79911587	83	82.9352	1.00007	4.5118	3.35089e-05	-0.102913	0.00039996	0.000152156	ALU
243076	15	83501106	83502005	+	2	49616	L1-REF_88	15	83551621	83551621	83	84.3455	0.999961	2.01911	1.20624e-06	0.142701	9.999e-05	1.99575e-06	L1
243274	15	85950784	85952077	+	1	272886	ALU-NREF_2349	15	86224963	86224963	83	82.3029	0.999934	0.997355	1.04359e-05	-0.161376	0.00019998	1.13511e-05	ALU
243301	15	86032977	86033680	+	1	191283	ALU-NREF_2349	15	86224963	86224963	83	83.6809	1.00002	1.00117	8.34289e-05	-0.411187	0.00019998	7.80585e-05	ALU
243327	15	86154372	86155134	+	1	69829	ALU-NREF_2349	15	86224963	86224963	83	81.5248	1	0.997497	4.26765e-05	-0.27166	9.999e-05	4.98488e-05	ALU
243339	15	86232853	86233364	+	1	-7890	ALU-NREF_2349	15	86224963	86224963	83	83.0811	1.00001	0.996331	0.00014378	0.0825178	9.999e-05	0.000142169	ALU
244488	15	100842020	100842679	+	5	-31027	ALU-NREF_2361	15	100810993	100810993	83	84.232	0.999898	4.57798	8.56281e-07	0.40437	9.999e-05	3.25325e-06	ALU
244498	15	101001054	101001831	+	5	-102074	ALU-NREF_2363	15	100898980	100898980	83	83.1621	0.999948	4.4802	2.63487e-05	0.176868	0.00029997	0.000115964	ALU
246125	16	23521423	23522269	+	3	6267	ALU-REF_785	16	23528536	23528536	83	83.0973	1.00003	2.98003	3.72611e-08	0.0999234	9.999e-05	1.08958e-07	ALU
246161	16	23864212	23865183	+	3	117	ALU-NREF_2379	16	23865300	23865300	83	83.1621	1	2.99627	8.13514e-12	0.20253	9.999e-05	2.32581e-11	ALU
246793	16	32330657	32331738	+	1	66649	ALU-NREF_2381	16	32398387	32398387	83	80.2766	0.999943	0.975499	3.10409e-06	0.526084	9.999e-05	4.40641e-06	ALU
246794	16	32334775	32335615	+	1	62772	ALU-NREF_2381	16	32398387	32398387	83	84.1186	0.999949	1.00255	1.05026e-06	0.754919	9.999e-05	8.90917e-07	ALU
246795	16	32350639	32352399	+	1	45988	ALU-NREF_2381	16	32398387	32398387	83	83.3566	0.999967	1.00168	4.59411e-07	0.448204	9.999e-05	4.34907e-07	ALU
246796	16	32352784	32353604	+	1	44783	ALU-NREF_2381	16	32398387	32398387	83	84.2969	1.00004	1.01634	1.92552e-06	0.409021	9.999e-05	1.62498e-06	ALU
246797	16	32353935	32354857	+	1	43530	ALU-NREF_2381	16	32398387	32398387	83	84.7832	1.00003	1.01896	7.99525e-08	0.550939	9.999e-05	5.90546e-08	ALU
246798	16	32357778	32358378	+	1	40009	ALU-NREF_2381	16	32398387	32398387	83	83.1945	1.00003	0.985323	6.52179e-06	0.482731	9.999e-05	6.26514e-06	ALU
246799	16	32360747	32361882	+	1	36505	ALU-NREF_2381	16	32398387	32398387	83	83.7943	0.999967	1.00291	2.83525e-06	0.397521	9.999e-05	2.54849e-06	ALU
246800	16	32363476	32364742	+	1	33645	ALU-NREF_2381	16	32398387	32398387	83	80.0172	1.00004	0.992555	7.04566e-07	0.418852	9.999e-05	1.10923e-06	ALU
246801	16	32366880	32367504	+	1	30883	ALU-NREF_2381	16	32398387	32398387	83	82.9027	0.99993	0.998554	4.98836e-06	0.513632	0.00019998	5.04976e-06	ALU
246802	16	32368383	32368935	+	1	29452	ALU-NREF_2381	16	32398387	32398387	83	81.0061	0.999938	0.996409	6.49542e-06	0.586673	9.999e-05	8.37437e-06	ALU
246805	16	32450446	32451318	+	1	-52059	ALU-NREF_2381	16	32398387	32398387	83	85.2047	0.999935	1.00735	5.16628e-07	0.31692	9.999e-05	3.67467e-07	ALU
246806	16	32456147	32457506	+	1	-57760	ALU-NREF_2381	16	32398387	32398387	83	82.3029	1.00007	0.962567	9.83957e-05	0.296355	9.999e-05	0.000101297	ALU
246809	16	32479781	32481136	+	2	-81394	ALU-NREF_2381	16	32398387	32398387	83	83.6809	0.999956	2.0342	4.10106e-05	0.259158	0.00019998	7.75717e-05	ALU
246812	16	32487697	32488655	+	2	-89310	ALU-NREF_2381	16	32398387	32398387	83	82.384	0.999944	2.02635	3.93898e-06	0.25638	9.999e-05	8.67772e-06	ALU
246814	16	32605231	32607291	+	2	-206844	ALU-NREF_2381	16	32398387	32398387	83	84.1186	1.00003	1.97615	9.23044e-07	0.292402	9.999e-05	1.5391e-06	ALU
246815	16	32608437	32609976	+	2	-210050	ALU-NREF_2381	16	32398387	32398387	83	84.9291	0.999916	2.02224	7.13369e-05	0.237694	0.00039996	0.00011881	ALU
246816	16	32625926	32627637	+	2	-227539	ALU-NREF_2381	16	32398387	32398387	83	83.2594	0.999943	2.01163	3.24356e-07	0.355025	9.999e-05	6.25859e-07	ALU
246818	16	32630312	32631152	+	2	-231925	ALU-NREF_2381	16	32398387	32398387	83	86.1936	1.00004	2.07163	7.10542e-05	0.418358	0.00029997	0.000106566	ALU
246833	16	32944731	32945477	+	2	-546344	ALU-NREF_2381	16	32398387	32398387	83	83.1783	1	2.0218	7.54043e-06	0.397711	0.00019998	1.49031e-05	ALU
246855	16	33388510	33389075	+	2	-990123	ALU-NREF_2381	16	32398387	32398387	83	82.0111	1.00003	2.00007	1.96126e-05	0.381443	0.00019998	4.39798e-05	ALU
247074	16	46665955	46667493	+	1	41514	ALU-NREF_2383	16	46709007	46709007	83	81.5248	0.999966	0.985079	2.15514e-07	0.627762	9.999e-05	2.72409e-07	ALU
247082	16	46777021	46777724	+	1	-68014	ALU-NREF_2383	16	46709007	46709007	83	82.9514	0.99996	0.986938	8.90431e-06	-0.15712	9.999e-05	8.84576e-06	ALU
247271	16	48645621	48646078	+	2	170790	ALU-REF_788	16	48816868	48816868	83	83.7295	0.999974	1.99521	1.12337e-05	-0.188198	9.999e-05	2.05047e-05	ALU
247277	16	48664051	48664817	+	2	152051	ALU-REF_788	16	48816868	48816868	83	83.9889	0.999977	2.03968	1.32531e-05	-0.16709	9.999e-05	2.40017e-05	ALU
247596	16	53856853	53857581	+	2	17400	ALU-NREF_2386	16	53874981	53874981	83	82.4002	0.999973	1.99353	4.0704e-12	0.580587	9.999e-05	9.70474e-12	ALU
247597	16	53874234	53874945	+	2	36	ALU-NREF_2386	16	53874981	53874981	83	83.308	0.999994	2.02157	2.74188e-08	-0.27216	9.999e-05	5.22377e-08	ALU
248507	16	69998873	69999633	+	2	553377	ALU-REF_797	16	70553010	70553010	83	84.1023	0.999964	2.01662	1.15049e-06	0.455329	9.999e-05	1.96971e-06	ALU
249246	16	80475664	80476366	+	3	-7033	ALU-REF_799	16	80468631	80468631	83	83.0162	0.999912	3.00981	5.91441e-06	0.435228	9.999e-05	1.77812e-05	ALU
249616	16	85062266	85062677	+	1	46031	ALU-NREF_2402	16	85108708	85108708	83	81.0385	1.00007	0.990378	9.66998e-05	0.152313	9.999e-05	0.000115903	ALU
249626	16	85120179	85120801	+	1	-11471	ALU-NREF_2402	16	85108708	85108708	83	85.9666	0.999951	1.01794	2.42619e-05	-0.116664	9.999e-05	1.76502e-05	ALU
249629	16	85137081	85137525	+	1	-28373	ALU-NREF_2402	16	85108708	85108708	83	83.0648	1.00007	0.998111	1.98385e-10	0.67572	9.999e-05	1.9449e-10	ALU
251307	17	18585226	18586051	+	1	205088	SVA-REF_16	17	18791139	18791139	83	82.9027	1.00007	1.00229	5.83367e-08	0.359744	9.999e-05	5.94578e-08	SVA
251316	17	18761066	18761658	+	1	29481	SVA-REF_16	17	18791139	18791139	83	82.5947	0.999971	0.994492	2.96329e-06	0.0876134	9.999e-05	3.11756e-06	SVA
251317	17	18763653	18764507	+	1	26632	SVA-REF_16	17	18791139	18791139	83	82.3516	0.999949	0.988569	4.7728e-09	0.19355	9.999e-05	5.42394e-09	SVA
253700	17	54910405	54911859	+	2	35724	ALU-NREF_2441	17	54947583	54947583	83	84.54	0.999924	2.03438	1.03505e-05	0.0392747	0.00019998	1.74286e-05	ALU
253702	17	54923202	54923874	+	2	23709	ALU-NREF_2441	17	54947583	54947583	83	83.9078	0.999977	1.98266	2.47853e-06	-0.183931	9.999e-05	4.32886e-06	ALU
253703	17	54928090	54928910	+	3	18673	ALU-NREF_2441	17	54947583	54947583	83	83.8592	0.999943	3.01217	3.27263e-07	-0.280578	9.999e-05	8.57143e-07	ALU
253705	17	54947348	54948169	+	3	0	ALU-NREF_2441	17	54947583	54947583	83	83.1297	1.00008	2.99267	6.18436e-20	-0.900726	9.999e-05	1.72586e-19	ALU
254518	17	65289609	65290336	+	4	13182	ALU-NREF_2457	17	65303518	65303518	83	83.3729	0.999912	3.98907	4.70602e-07	0.156402	9.999e-05	1.77103e-06	ALU
254793	17	68294778	68295775	+	4	61634	L1-NREF_266	17	68357409	68357409	83	82.9189	0.999933	3.81268	4.81298e-07	-0.405733	9.999e-05	1.86054e-06	L1
254803	17	68349425	68350078	+	4	7331	L1-NREF_266	17	68357409	68357409	83	82.8541	0.999979	3.74671	3.35496e-06	-0.256503	0.00019998	1.28259e-05	L1
254804	17	68361091	68361803	+	4	-3682	L1-NREF_266	17	68357409	68357409	83	84.2969	1.00007	3.86177	1.02701e-10	-0.343217	9.999e-05	2.8307e-10	L1
254805	17	68401560	68402399	+	4	-44151	L1-NREF_266	17	68357409	68357409	83	84.5238	0.999949	3.89405	2.46973e-07	-0.30617	9.999e-05	7.46239e-07	L1
255508	17	76009238	76010412	+	2	-20955	ALU-REF_820	17	75988283	75988283	83	85.8045	1.00005	1.88275	7.47344e-05	0.175788	9.999e-05	0.000106113	ALU
255819	17	79581303	79582146	+	2	-3622	ALU-REF_821	17	79577681	79577681	83	84.7346	0.999953	2.03494	4.17198e-05	-0.330532	0.00019998	7.05241e-05	ALU
255820	17	79601464	79601816	+	3	-23783	ALU-REF_821	17	79577681	79577681	83	84.5238	0.999944	3.0356	2.95557e-06	-0.506689	0.00019998	7.27616e-06	ALU
255941	17	80709308	80710665	+	2	49327	SVA-NREF_98	17	80759992	80759992	83	84.1996	0.999969	2.01748	5.99241e-05	0.0745568	0.00019998	0.000106868	SVA

## Sheet: LCL.e-ca-QTL
pMEI					Gene																ATAC peak
MEI	Chr_MEI	MEI_start	MEI_end	mei	Gene	Gene_Chr	Gene_start	Gene_end	strand	nb_tested	dist_Gene_MEI	df	dummy	Beta1	Beta2	P_nominal	slope	P_empirical	P_value	gene_symbol	peak_name	peak_chr	peak_start	peak_end	strand	nb_tested	dist_peak_MEI	df	dummy	Beta1	Beta2	P_nominal	slope	P_empirical	P_value
ALU-REF_5	1	27804113	27804113	ALU	ENSG00000117758	1	28099695	28150963	+	1	-295582	442	446.899	1.00001	1.01979	0.000685258	0.199496	0.00129987	0.000652325	STX12	1812	1	27247787	27248585	+	1	555528	83	85.3668	1.00001	1.00586	0.000114443	-0.0716889	0.00019998	9.18089e-05
ALU-REF_5	1	27804113	27804113	ALU	ENSG00000117758	1	28099695	28150963	+	1	-295582	442	446.899	1.00001	1.01979	0.000685258	0.199496	0.00129987	0.000652325	STX12	1873	1	27753766	27754353	+	1	49760	83	85.2533	0.999958	1.01138	8.38125e-07	0.354274	9.999e-05	6.01356e-07
L1-NREF_3	1	75192907	75192907	L1	ENSG00000116791	1	75171171	75232362	-	5	0	442	445.593	1.00001	4.8424	7.28999e-17	-0.509386	9.999e-05	2.64775e-16	CRYZ	5781	1	75197055	75197416	+	5	-4148	83	82.384	0.999905	4.81025	1.79443e-14	-0.240614	9.999e-05	1.08177e-13
L1-REF_4	1	86740981	86740981	L1	ENSG00000171502	1	86194917	86622626	-	2	-118355	442	435.105	1.00001	1.94415	0.000378021	0.297863	0.00079992	0.000816592	COL24A1	7276	1	87258298	87259316	+	2	-517317	83	83.2918	0.999969	2.03946	6.91237e-05	0.195476	0.00029997	0.000136898
ALU-NREF_103	1	112992009	112992009	ALU	ENSG00000143079	1	112938804	113006078	+	4	0	442	444.255	1.00001	3.78642	4.24352e-08	-0.219103	9.999e-05	1.48442e-07	CTTNBP2NL	10052	1	112936761	112937473	+	4	54536	83	82.692	0.999952	3.74765	5.74427e-06	-0.116838	0.00019998	2.24202e-05
ALU-NREF_103	1	112992009	112992009	ALU	ENSG00000143079	1	112938804	113006078	+	4	0	442	444.255	1.00001	3.78642	4.24352e-08	-0.219103	9.999e-05	1.48442e-07	CTTNBP2NL	10055	1	112944976	112946276	+	4	45733	83	84.7184	0.999931	3.82544	9.76997e-22	-0.604432	9.999e-05	1.42839e-21
ALU-REF_20	1	117078165	117078165	ALU	ENSG00000116815	1	117057158	117113661	-	2	0	442	452.435	1.00001	2.00925	1.04475e-05	-0.317563	0.00019998	1.65057e-05	CD58	10330	1	117048787	117049110	+	1	29055	83	81.9787	1	1.00535	2.79821e-13	0.532837	9.999e-05	3.9368e-13
ALU-REF_20	1	117078165	117078165	ALU	ENSG00000116815	1	117057158	117113661	-	2	0	442	452.435	1.00001	2.00925	1.04475e-05	-0.317563	0.00019998	1.65057e-05	CD58	10347	1	117100854	117101101	+	2	-22689	83	84.2158	1.00004	2.01703	8.23076e-08	-0.251668	9.999e-05	1.33328e-07
ALU-REF_24	1	185373097	185373097	ALU	ENSG00000116679	1	185265521	185286461	-	2	-86636	442	443.036	0.999995	1.98351	6.61145e-06	-0.231196	9.999e-05	1.2792e-05	IVNS1ABP	14390	1	185366990	185368156	+	1	4941	83	82.692	0.999979	1.00587	2.72705e-05	-0.189871	9.999e-05	2.84011e-05
ALU-REF_24	1	185373097	185373097	ALU	ENSG00000116679	1	185265521	185286461	-	2	-86636	442	443.036	0.999995	1.98351	6.61145e-06	-0.231196	9.999e-05	1.2792e-05	IVNS1ABP	14392	1	185372021	185372933	+	1	164	83	81.849	0.999998	0.985206	0.000119442	-0.139544	0.00039996	0.000131299
ALU-REF_24	1	185373097	185373097	ALU	ENSG00000116679	1	185265521	185286461	-	2	-86636	442	443.036	0.999995	1.98351	6.61145e-06	-0.231196	9.999e-05	1.2792e-05	IVNS1ABP	14393	1	185373486	185373787	+	1	-389	83	83.2756	1.00006	1.0199	1.67231e-07	-0.421439	9.999e-05	1.62527e-07
ALU-REF_24	1	185373097	185373097	ALU	ENSG00000116679	1	185265521	185286461	-	2	-86636	442	443.036	0.999995	1.98351	6.61145e-06	-0.231196	9.999e-05	1.2792e-05	IVNS1ABP	14394	1	185374042	185374535	+	1	-945	83	83.9564	1.00003	1.0037	1.20095e-05	-0.193801	9.999e-05	1.0726e-05
ALU-REF_24	1	185373097	185373097	ALU	ENSG00000116679	1	185265521	185286461	-	2	-86636	442	443.036	0.999995	1.98351	6.61145e-06	-0.231196	9.999e-05	1.2792e-05	IVNS1ABP	14395	1	185375210	185376123	+	1	-2113	83	83.8754	1.00005	1.01225	1.91798e-06	-0.260228	9.999e-05	1.71181e-06
ALU-REF_24	1	185373097	185373097	ALU	ENSG00000116679	1	185265521	185286461	-	2	-86636	442	443.036	0.999995	1.98351	6.61145e-06	-0.231196	9.999e-05	1.2792e-05	IVNS1ABP	14396	1	185377686	185378365	+	1	-4589	83	83.2432	0.999963	1.01041	4.57026e-06	-0.186671	9.999e-05	4.47304e-06
ALU-REF_24	1	185373097	185373097	ALU	ENSG00000116679	1	185265521	185286461	-	2	-86636	442	443.036	0.999995	1.98351	6.61145e-06	-0.231196	9.999e-05	1.2792e-05	IVNS1ABP	14397	1	185379166	185379657	+	1	-6069	83	81.6707	0.99999	1.00143	1.39422e-05	-0.212412	9.999e-05	1.63781e-05
ALU-REF_24	1	185373097	185373097	ALU	ENSG00000116679	1	185265521	185286461	-	2	-86636	442	443.036	0.999995	1.98351	6.61145e-06	-0.231196	9.999e-05	1.2792e-05	IVNS1ABP	14399	1	185381422	185382190	+	1	-8325	83	81.9787	0.999971	0.980012	1.55365e-05	-0.207226	9.999e-05	1.7194e-05
ALU-NREF_191	1	222870697	222870697	ALU	ENSG00000143498	1	222731245	222763275	-	2	-107422	442	449.079	0.999999	2.00738	0.0006046	0.160842	0.00049995	0.00109648	TAF1A	19556	1	222793848	222794460	+	2	76237	83	84.9615	1.00004	2.02403	1.05922e-07	-0.278959	9.999e-05	1.51454e-07
ALU-NREF_1643	10	29102541	29102541	ALU	ENSG00000095739	10	28966272	28971868	+	2	130673	442	483.977	1.00001	1.90855	2.0447e-07	-0.300658	9.999e-05	1.03641e-07	BAMBI	186241	10	29096795	29097712	+	2	4829	83	89.4195	0.999933	1.8855	1.9727e-12	-0.648064	9.999e-05	5.24e-13
ALU-REF_584	10	35593207	35593207	ALU	ENSG00000108100	10	35535954	35860852	+	7	0	442	441.633	0.969715	6.56446	0.000104586	0.200949	0.00169983	0.000870206	CCNY	186867	10	35597183	35598511	+	4	-3976	83	83.843	0.999907	3.98048	1.67523e-06	-0.170786	9.999e-05	5.90989e-06
ALU-REF_593	10	70272097	70272097	ALU	ENSG00000138346	10	70173822	70231879	-	4	-40218	442	443.122	0.999999	3.90413	1.15361e-16	0.530681	9.999e-05	4.12246e-16	DNA2	190035	10	70384959	70385896	+	5	-112862	83	83.8268	0.99995	5.04332	1.64537e-05	0.234332	0.00029997	7.53039e-05
ALU-NREF_1866	11	102348326	102348326	ALU	ENSG00000152558	11	102267064	102369532	-	6	0	442	449.295	0.997364	6.12154	3.61287e-06	0.256937	9.999e-05	1.89366e-05	TMEM123	204969	11	102344976	102345861	+	5	2465	83	82.2219	1.00011	4.85054	2.49872e-05	0.0809345	0.00019998	0.000132217
ALU-NREF_1866	11	102348326	102348326	ALU	ENSG00000152558	11	102267064	102369532	-	6	0	442	449.295	0.997364	6.12154	3.61287e-06	0.256937	9.999e-05	1.89366e-05	TMEM123	204972	11	102358796	102359513	+	5	-10470	83	81.2979	0.999974	4.90508	6.10189e-10	-0.176146	9.999e-05	4.4889e-09
ALU-REF_658	12	8625579	8625579	ALU	ENSG00000166527	12	8662072	8674962	+	2	-36493	442	476.823	1	2.05045	3.9043e-06	0.31751	0.00069993	3.33522e-06	CLEC4D	208370	12	8601938	8602732	+	4	22847	83	85.383	0.999926	4.01648	4.57636e-06	-0.169317	9.999e-05	1.34056e-05
ALU-REF_658	12	8625579	8625579	ALU	ENSG00000205846	12	8608523	8630926	+	3	0	442	513.178	0.999995	3.14468	0.000338199	0.24394	0.00939906	0.000353261	CLEC6A	208370	12	8601938	8602732	+	4	22847	83	85.383	0.999926	4.01648	4.57636e-06	-0.169317	9.999e-05	1.34056e-05
ALU-NREF_1906	12	9871162	9871162	ALU	ENSG00000111796	12	9747148	9760482	-	3	-110680	442	455.176	0.999989	3.07619	1.9444e-06	-0.298548	9.999e-05	4.20882e-06	KLRB1	208466	12	9870094	9870541	+	3	621	83	82.465	1.00008	3.02656	3.24463e-12	0.222195	9.999e-05	1.15065e-11
ALU-NREF_1906	12	9871162	9871162	ALU	ENSG00000184293	12	9868457	9885895	-	3	0	442	450.654	0.999992	2.98044	1.20147e-05	0.251892	9.999e-05	2.94176e-05	CLECL1	208466	12	9870094	9870541	+	3	621	83	82.465	1.00008	3.02656	3.24463e-12	0.222195	9.999e-05	1.15065e-11
ALU-NREF_1906	12	9871162	9871162	ALU	ENSG00000255753	12	9466999	9468769	-	3	-402393	442	446.057	0.999995	3.00989	7.46354e-05	-0.224663	9.999e-05	0.000208154	RP11-22B23.2	208466	12	9870094	9870541	+	3	621	83	82.465	1.00008	3.02656	3.24463e-12	0.222195	9.999e-05	1.15065e-11
ALU-NREF_1906	12	9871162	9871162	ALU	ENSG00000256594	12	9787189	9811008	+	3	60154	442	452.856	0.999988	3.06862	8.96039e-11	0.374747	9.999e-05	1.62143e-10	RP11-705C15.2	208466	12	9870094	9870541	+	3	621	83	82.465	1.00008	3.02656	3.24463e-12	0.222195	9.999e-05	1.15065e-11
ALU-REF_660	12	11258525	11258525	ALU	ENSG00000111215	12	10977560	11324212	-	4	0	442	450.514	1.00001	3.85802	2.9596e-49	0.68802	9.999e-05	1.38619e-49	PRR4	208578	12	11227993	11228724	+	4	29801	83	83.3242	1.00006	3.94225	5.38962e-20	1.34255	9.999e-05	1.7942e-19
ALU-REF_660	12	11258525	11258525	ALU	ENSG00000111215	12	10977560	11324212	-	4	0	442	450.514	1.00001	3.85802	2.9596e-49	0.68802	9.999e-05	1.38619e-49	PRR4	208579	12	11237915	11238596	+	3	19929	83	84.0699	1.00002	2.98519	5.91189e-21	1.42432	9.999e-05	9.89399e-21
ALU-NREF_2042	12	112777131	112777131	ALU	ENSG00000173064	12	112597993	112819896	-	1	0	442	430.087	0.999999	0.992411	0.000902565	0.25143	0.00059994	0.00105169	HECTD4	219850	12	111792826	111793760	+	1	983371	83	80.6008	1.00002	0.998746	1.91545e-07	0.262112	9.999e-05	2.87627e-07
ALU-NREF_2042	12	112777131	112777131	ALU	ENSG00000173064	12	112597993	112819896	-	1	0	442	430.087	0.999999	0.992411	0.000902565	0.25143	0.00059994	0.00105169	HECTD4	219899	12	112267360	112267936	+	1	509195	83	84.848	1.00006	0.999293	0.000104175	-0.380525	0.00029997	8.70264e-05
ALU-NREF_2042	12	112777131	112777131	ALU	ENSG00000173064	12	112597993	112819896	-	1	0	442	430.087	0.999999	0.992411	0.000902565	0.25143	0.00059994	0.00105169	HECTD4	219916	12	112517130	112518220	+	1	258911	83	85.6424	0.999994	1.02292	3.24809e-05	0.239299	0.00019998	2.48428e-05
ALU-NREF_2042	12	112777131	112777131	ALU	ENSG00000173064	12	112597993	112819896	-	1	0	442	430.087	0.999999	0.992411	0.000902565	0.25143	0.00059994	0.00105169	HECTD4	219937	12	112785204	112785857	+	1	-8073	83	82.157	1.00007	0.990989	4.05269e-07	0.242786	9.999e-05	4.59611e-07
ALU-NREF_2042	12	112777131	112777131	ALU	ENSG00000198270	12	112369087	112450970	-	1	-326161	442	441.871	1.00001	1.01621	3.71872e-07	0.381043	9.999e-05	3.79356e-07	TMEM116	219850	12	111792826	111793760	+	1	983371	83	80.6008	1.00002	0.998746	1.91545e-07	0.262112	9.999e-05	2.87627e-07
ALU-NREF_2042	12	112777131	112777131	ALU	ENSG00000198270	12	112369087	112450970	-	1	-326161	442	441.871	1.00001	1.01621	3.71872e-07	0.381043	9.999e-05	3.79356e-07	TMEM116	219899	12	112267360	112267936	+	1	509195	83	84.848	1.00006	0.999293	0.000104175	-0.380525	0.00029997	8.70264e-05
ALU-NREF_2042	12	112777131	112777131	ALU	ENSG00000198270	12	112369087	112450970	-	1	-326161	442	441.871	1.00001	1.01621	3.71872e-07	0.381043	9.999e-05	3.79356e-07	TMEM116	219916	12	112517130	112518220	+	1	258911	83	85.6424	0.999994	1.02292	3.24809e-05	0.239299	0.00019998	2.48428e-05
ALU-NREF_2042	12	112777131	112777131	ALU	ENSG00000198270	12	112369087	112450970	-	1	-326161	442	441.871	1.00001	1.01621	3.71872e-07	0.381043	9.999e-05	3.79356e-07	TMEM116	219937	12	112785204	112785857	+	1	-8073	83	82.157	1.00007	0.990989	4.05269e-07	0.242786	9.999e-05	4.59611e-07
ALU-NREF_2042	12	112777131	112777131	ALU	ENSG00000226469	12	112364823	112366821	+	1	410310	442	443.975	1	0.99654	0.000355597	0.281595	0.00049995	0.000343715	ADAM1B	219850	12	111792826	111793760	+	1	983371	83	80.6008	1.00002	0.998746	1.91545e-07	0.262112	9.999e-05	2.87627e-07
ALU-NREF_2042	12	112777131	112777131	ALU	ENSG00000226469	12	112364823	112366821	+	1	410310	442	443.975	1	0.99654	0.000355597	0.281595	0.00049995	0.000343715	ADAM1B	219899	12	112267360	112267936	+	1	509195	83	84.848	1.00006	0.999293	0.000104175	-0.380525	0.00029997	8.70264e-05
ALU-NREF_2042	12	112777131	112777131	ALU	ENSG00000226469	12	112364823	112366821	+	1	410310	442	443.975	1	0.99654	0.000355597	0.281595	0.00049995	0.000343715	ADAM1B	219916	12	112517130	112518220	+	1	258911	83	85.6424	0.999994	1.02292	3.24809e-05	0.239299	0.00019998	2.48428e-05
ALU-NREF_2042	12	112777131	112777131	ALU	ENSG00000226469	12	112364823	112366821	+	1	410310	442	443.975	1	0.99654	0.000355597	0.281595	0.00049995	0.000343715	ADAM1B	219937	12	112785204	112785857	+	1	-8073	83	82.157	1.00007	0.990989	4.05269e-07	0.242786	9.999e-05	4.59611e-07
ALU-NREF_2042	12	112777131	112777131	ALU	ENSG00000229186	12	112337068	112340042	+	1	437089	442	438.288	0.999994	1.00305	0.000325659	-0.249154	0.00079992	0.000346185	ADAM1A	219850	12	111792826	111793760	+	1	983371	83	80.6008	1.00002	0.998746	1.91545e-07	0.262112	9.999e-05	2.87627e-07
ALU-NREF_2042	12	112777131	112777131	ALU	ENSG00000229186	12	112337068	112340042	+	1	437089	442	438.288	0.999994	1.00305	0.000325659	-0.249154	0.00079992	0.000346185	ADAM1A	219899	12	112267360	112267936	+	1	509195	83	84.848	1.00006	0.999293	0.000104175	-0.380525	0.00029997	8.70264e-05
ALU-NREF_2042	12	112777131	112777131	ALU	ENSG00000229186	12	112337068	112340042	+	1	437089	442	438.288	0.999994	1.00305	0.000325659	-0.249154	0.00079992	0.000346185	ADAM1A	219916	12	112517130	112518220	+	1	258911	83	85.6424	0.999994	1.02292	3.24809e-05	0.239299	0.00019998	2.48428e-05
ALU-NREF_2042	12	112777131	112777131	ALU	ENSG00000229186	12	112337068	112340042	+	1	437089	442	438.288	0.999994	1.00305	0.000325659	-0.249154	0.00079992	0.000346185	ADAM1A	219937	12	112785204	112785857	+	1	-8073	83	82.157	1.00007	0.990989	4.05269e-07	0.242786	9.999e-05	4.59611e-07
ALU-NREF_2069	13	21894780	21894780	ALU	ENSG00000215571	13	21893232	21895005	+	5	0	442	442.799	1	4.83185	3.38938e-07	-0.319845	9.999e-05	1.59819e-06	GRK6P1	221598	13	21898859	21899496	+	5	-4079	83	82.6271	0.999946	4.97302	4.57551e-06	-0.207018	0.00019998	2.39239e-05
ALU-NREF_2104	13	50173371	50173371	ALU	ENSG00000152213	13	50202436	50208008	+	3	-29065	442	454.723	0.999989	3.09379	1.09083e-07	-0.28231	9.999e-05	2.21835e-07	ARL11	224110	13	50183051	50183451	+	3	-9680	83	82.3029	0.999973	2.86086	5.88687e-06	-0.153051	9.999e-05	1.84441e-05
ALU-NREF_2104	13	50173371	50173371	ALU	ENSG00000152213	13	50202436	50208008	+	3	-29065	442	454.723	0.999989	3.09379	1.09083e-07	-0.28231	9.999e-05	2.21835e-07	ARL11	224111	13	50194168	50194841	+	3	-20797	83	82.692	0.99999	2.96839	4.3613e-09	-0.803731	9.999e-05	1.38328e-08
ALU-REF_741	14	35401403	35401403	ALU	ENSG00000258493	14	35390072	35390212	+	2	11191	442	443.295	0.999995	2.00725	5.86456e-05	-0.244379	0.00029997	0.000114813	RP11-73E17.3	233323	14	35399678	35400830	+	2	573	83	86.4691	0.999958	2.06184	2.11862e-09	-0.143371	9.999e-05	2.01741e-09
ALU-NREF_2218	14	51719000	51719000	ALU	ENSG00000100505	14	51441981	51562779	-	2	-156221	442	435.115	0.999996	1.95366	1.69732e-08	0.334083	9.999e-05	4.28147e-08	TRIM9	234383	14	51561582	51562308	+	2	156692	83	81.8652	1.00003	2.00267	1.19257e-05	0.0817437	9.999e-05	2.74129e-05
ALU-NREF_2218	14	51719000	51719000	ALU	ENSG00000100505	14	51441981	51562779	-	2	-156221	442	435.115	0.999996	1.95366	1.69732e-08	0.334083	9.999e-05	4.28147e-08	TRIM9	234407	14	51761564	51762218	+	4	-42564	83	82.7244	1.00007	3.97776	3.58082e-05	-0.177261	0.00019998	0.000146684
ALU-NREF_2218	14	51719000	51719000	ALU	ENSG00000139921	14	51706881	51722759	+	4	0	442	437.608	0.999997	3.93716	2.21691e-11	0.335251	9.999e-05	1.09586e-10	TMX1	234383	14	51561582	51562308	+	2	156692	83	81.8652	1.00003	2.00267	1.19257e-05	0.0817437	9.999e-05	2.74129e-05
ALU-NREF_2218	14	51719000	51719000	ALU	ENSG00000139921	14	51706881	51722759	+	4	0	442	437.608	0.999997	3.93716	2.21691e-11	0.335251	9.999e-05	1.09586e-10	TMX1	234407	14	51761564	51762218	+	4	-42564	83	82.7244	1.00007	3.97776	3.58082e-05	-0.177261	0.00019998	0.000146684
ALU-NREF_2252	14	74186546	74186546	ALU	ENSG00000177465	14	74058411	74063200	+	2	123346	442	436.594	0.999991	1.96187	0.000392244	0.234948	0.00089991	0.000835495	ACOT4	236341	14	74003712	74004723	+	2	181823	83	82.8541	0.99997	2.02486	6.66254e-05	-0.700888	0.00029997	0.000136959
ALU-NREF_2252	14	74186546	74186546	ALU	ENSG00000177465	14	74058411	74063200	+	2	123346	442	436.594	0.999991	1.96187	0.000392244	0.234948	0.00089991	0.000835495	ACOT4	236342	14	74005647	74006349	+	2	180197	83	82.7082	0.999918	2.00911	7.00435e-05	-0.663358	9.999e-05	0.000145048
ALU-NREF_2254	14	75499581	75499581	ALU	ENSG00000119684	14	75480468	75518235	-	2	0	442	439.011	1.00001	1.95003	9.9208e-12	0.303783	9.999e-05	2.27005e-11	MLH3	236473	14	75625601	75626407	+	2	-126020	83	83.0486	1.00002	2.03418	5.02747e-14	0.297026	9.999e-05	1.00491e-13
ALU-NREF_2254	14	75499581	75499581	ALU	ENSG00000119718	14	75469615	75476292	+	2	23289	442	445.291	0.999997	2.00546	1.00626e-26	0.446388	9.999e-05	1.31238e-26	EIF2B2	236473	14	75625601	75626407	+	2	-126020	83	83.0486	1.00002	2.03418	5.02747e-14	0.297026	9.999e-05	1.00491e-13
ALU-NREF_2296	15	41100332	41100332	ALU	ENSG00000104129	15	41060068	41106767	-	3	0	442	440.187	0.999994	2.97567	0.000237972	0.146361	0.00089991	0.00072922	DNAJC17	240118	15	40856890	40857632	+	2	242700	83	84.3617	0.999973	1.99418	5.6148e-05	-0.0399103	9.999e-05	9.7236e-05
ALU-NREF_2296	15	41100332	41100332	ALU	ENSG00000128891	15	40820883	40857256	-	2	-243076	442	450.924	1	2.02264	6.8557e-06	0.274695	9.999e-05	1.11984e-05	C15orf57	240118	15	40856890	40857632	+	2	242700	83	84.3617	0.999973	1.99418	5.6148e-05	-0.0399103	9.999e-05	9.7236e-05
ALU-REF_773	15	51897702	51897702	ALU	ENSG00000104093	15	51739909	51915030	-	3	0	442	441.795	1.00001	2.99713	3.07923e-09	0.279555	9.999e-05	9.30535e-09	DMXL2	240839	15	51912860	51913145	+	3	-15158	83	84.8643	0.999916	3.02732	1.44768e-16	0.863559	9.999e-05	2.01205e-16
ALU-NREF_2337	15	77761597	77761597	ALU	ENSG00000140368	15	77285701	77329673	+	3	431924	442	466.668	1	2.95178	1.16102e-05	0.284826	9.999e-05	1.95347e-05	PSTPIP1	242707	15	77375990	77376641	+	3	384956	83	84.0051	1.00004	2.96709	2.79895e-06	0.15963	9.999e-05	7.22166e-06
ALU-NREF_2337	15	77761597	77761597	ALU	ENSG00000140368	15	77285701	77329673	+	3	431924	442	466.668	1	2.95178	1.16102e-05	0.284826	9.999e-05	1.95347e-05	PSTPIP1	242713	15	77465727	77466373	+	3	295224	83	82.2543	1.00003	2.89163	2.13871e-06	0.315541	9.999e-05	6.87175e-06
ALU-NREF_2337	15	77761597	77761597	ALU	ENSG00000140368	15	77285701	77329673	+	3	431924	442	466.668	1	2.95178	1.16102e-05	0.284826	9.999e-05	1.95347e-05	PSTPIP1	242733	15	77779417	77780373	+	3	-17820	83	84.4428	0.999909	2.96678	1.26168e-05	0.281659	0.00019998	3.14632e-05
ALU-NREF_2337	15	77761597	77761597	ALU	ENSG00000140391	15	77336360	77376326	-	3	-385271	442	457.571	0.999993	2.89585	1.10099e-06	0.291872	9.999e-05	2.06422e-06	TSPAN3	242707	15	77375990	77376641	+	3	384956	83	84.0051	1.00004	2.96709	2.79895e-06	0.15963	9.999e-05	7.22166e-06
ALU-NREF_2337	15	77761597	77761597	ALU	ENSG00000140391	15	77336360	77376326	-	3	-385271	442	457.571	0.999993	2.89585	1.10099e-06	0.291872	9.999e-05	2.06422e-06	TSPAN3	242713	15	77465727	77466373	+	3	295224	83	82.2543	1.00003	2.89163	2.13871e-06	0.315541	9.999e-05	6.87175e-06
ALU-NREF_2337	15	77761597	77761597	ALU	ENSG00000140391	15	77336360	77376326	-	3	-385271	442	457.571	0.999993	2.89585	1.10099e-06	0.291872	9.999e-05	2.06422e-06	TSPAN3	242733	15	77779417	77780373	+	3	-17820	83	84.4428	0.999909	2.96678	1.26168e-05	0.281659	0.00019998	3.14632e-05
ALU-NREF_2349	15	86224963	86224963	ALU	ENSG00000170776	15	85923803	86292586	+	1	0	442	451.507	1.00001	1.00068	0.000784621	-0.195335	0.00079992	0.000688919	AKAP13	243274	15	85950784	85952077	+	1	272886	83	82.3029	0.999934	0.997355	1.04359e-05	-0.161376	0.00019998	1.13511e-05
ALU-NREF_2349	15	86224963	86224963	ALU	ENSG00000170776	15	85923803	86292586	+	1	0	442	451.507	1.00001	1.00068	0.000784621	-0.195335	0.00079992	0.000688919	AKAP13	243301	15	86032977	86033680	+	1	191283	83	83.6809	1.00002	1.00117	8.34289e-05	-0.411187	0.00019998	7.80585e-05
ALU-NREF_2349	15	86224963	86224963	ALU	ENSG00000170776	15	85923803	86292586	+	1	0	442	451.507	1.00001	1.00068	0.000784621	-0.195335	0.00079992	0.000688919	AKAP13	243327	15	86154372	86155134	+	1	69829	83	81.5248	1	0.997497	4.26765e-05	-0.27166	9.999e-05	4.98488e-05
ALU-NREF_2349	15	86224963	86224963	ALU	ENSG00000170776	15	85923803	86292586	+	1	0	442	451.507	1.00001	1.00068	0.000784621	-0.195335	0.00079992	0.000688919	AKAP13	243339	15	86232853	86233364	+	1	-7890	83	83.0811	1.00001	0.996331	0.00014378	0.0825178	9.999e-05	0.000142169
ALU-REF_785	16	23528536	23528536	ALU	ENSG00000103356	16	23533336	23585710	-	3	4800	442	448.982	0.999998	2.99959	4.789e-11	-0.411912	9.999e-05	1.01276e-10	EARS2	246125	16	23521423	23522269	+	3	6267	83	83.0973	1.00003	2.98003	3.72611e-08	0.0999234	9.999e-05	1.08958e-07
ALU-REF_785	16	23528536	23528536	ALU	ENSG00000103365	16	23474864	23533316	-	3	0	442	439.162	0.999998	2.99977	4.37488e-05	-0.206889	0.00019998	0.000138874	GGA2	246125	16	23521423	23522269	+	3	6267	83	83.0973	1.00003	2.98003	3.72611e-08	0.0999234	9.999e-05	1.08958e-07
ALU-REF_785	16	23528536	23528536	ALU	ENSG00000166847	16	23652714	23681195	+	3	-124178	442	436.604	1	2.91667	9.46882e-18	0.503982	9.999e-05	4.35669e-17	DCTN5	246125	16	23521423	23522269	+	3	6267	83	83.0973	1.00003	2.98003	3.72611e-08	0.0999234	9.999e-05	1.08958e-07
ALU-NREF_2402	16	85108708	85108708	ALU	ENSG00000135709	16	85061376	85127836	+	1	0	442	438.612	1.00001	0.981151	3.24321e-05	0.270927	0.00019998	3.41183e-05	KIAA0513	249616	16	85062266	85062677	+	1	46031	83	81.0385	1.00007	0.990378	9.66998e-05	0.152313	9.999e-05	0.000115903
ALU-NREF_2402	16	85108708	85108708	ALU	ENSG00000135709	16	85061376	85127836	+	1	0	442	438.612	1.00001	0.981151	3.24321e-05	0.270927	0.00019998	3.41183e-05	KIAA0513	249626	16	85120179	85120801	+	1	-11471	83	85.9666	0.999951	1.01794	2.42619e-05	-0.116664	9.999e-05	1.76502e-05
ALU-NREF_2402	16	85108708	85108708	ALU	ENSG00000135709	16	85061376	85127836	+	1	0	442	438.612	1.00001	0.981151	3.24321e-05	0.270927	0.00019998	3.41183e-05	KIAA0513	249629	16	85137081	85137525	+	1	-28373	83	83.0648	1.00007	0.998111	1.98385e-10	0.67572	9.999e-05	1.9449e-10
SVA-REF_16	17	18791139	18791139	SVA	ENSG00000171928	17	18684309	18710027	+	1	81112	442	440.586	1.00001	0.999613	1.57534e-12	0.331174	9.999e-05	1.70805e-12	TVP23B	251307	17	18585226	18586051	+	1	205088	83	82.9027	1.00007	1.00229	5.83367e-08	0.359744	9.999e-05	5.94578e-08
SVA-REF_16	17	18791139	18791139	SVA	ENSG00000171928	17	18684309	18710027	+	1	81112	442	440.586	1.00001	0.999613	1.57534e-12	0.331174	9.999e-05	1.70805e-12	TVP23B	251316	17	18761066	18761658	+	1	29481	83	82.5947	0.999971	0.994492	2.96329e-06	0.0876134	9.999e-05	3.11756e-06
SVA-REF_16	17	18791139	18791139	SVA	ENSG00000171928	17	18684309	18710027	+	1	81112	442	440.586	1.00001	0.999613	1.57534e-12	0.331174	9.999e-05	1.70805e-12	TVP23B	251317	17	18763653	18764507	+	1	26632	83	82.3516	0.999949	0.988569	4.7728e-09	0.19355	9.999e-05	5.42394e-09
ALU-NREF_2441	17	54947583	54947583	ALU	ENSG00000121060	17	54965271	54991399	-	3	17688	442	448.065	1	3.03166	5.11641e-06	-0.1564	0.00019998	1.33625e-05	TRIM25	253700	17	54910405	54911859	+	2	35724	83	84.54	0.999924	2.03438	1.03505e-05	0.0392747	0.00019998	1.74286e-05
ALU-NREF_2441	17	54947583	54947583	ALU	ENSG00000121060	17	54965271	54991399	-	3	17688	442	448.065	1	3.03166	5.11641e-06	-0.1564	0.00019998	1.33625e-05	TRIM25	253702	17	54923202	54923874	+	2	23709	83	83.9078	0.999977	1.98266	2.47853e-06	-0.183931	9.999e-05	4.32886e-06
ALU-NREF_2441	17	54947583	54947583	ALU	ENSG00000121060	17	54965271	54991399	-	3	17688	442	448.065	1	3.03166	5.11641e-06	-0.1564	0.00019998	1.33625e-05	TRIM25	253703	17	54928090	54928910	+	3	18673	83	83.8592	0.999943	3.01217	3.27263e-07	-0.280578	9.999e-05	8.57143e-07
ALU-NREF_2441	17	54947583	54947583	ALU	ENSG00000121060	17	54965271	54991399	-	3	17688	442	448.065	1	3.03166	5.11641e-06	-0.1564	0.00019998	1.33625e-05	TRIM25	253705	17	54947348	54948169	+	3	0	83	83.1297	1.00008	2.99267	6.18436e-20	-0.900726	9.999e-05	1.72586e-19
ALU-REF_821	17	79577681	79577681	ALU	ENSG00000182446	17	79523914	79615779	-	3	0	442	442.043	1	3.05157	3.89177e-06	-0.211024	9.999e-05	1.18628e-05	NPLOC4	255819	17	79581303	79582146	+	2	-3622	83	84.7346	0.999953	2.03494	4.17198e-05	-0.330532	0.00019998	7.05241e-05
ALU-REF_821	17	79577681	79577681	ALU	ENSG00000182446	17	79523914	79615779	-	3	0	442	442.043	1	3.05157	3.89177e-06	-0.211024	9.999e-05	1.18628e-05	NPLOC4	255820	17	79601464	79601816	+	3	-23783	83	84.5238	0.999944	3.0356	2.95557e-06	-0.506689	0.00019998	7.27616e-06
SVA-NREF_98	17	80759992	80759992	SVA	ENSG00000141560	17	80674560	80688204	+	2	71788	442	442.852	1.00001	2.00159	1.61108e-05	0.290557	9.999e-05	3.16424e-05	FN3KRP	255941	17	80709308	80710665	+	2	49327	83	84.1996	0.999969	2.01748	5.99241e-05	0.0745568	0.00019998	0.000106868
ALU-REF_827	18	32661955	32661955	ALU	ENSG00000166974	18	32556893	32723434	+	3	0	442	446.23	1	3.07008	0.000105618	-0.18923	0.00039996	0.000300395	MAPRE2	258409	18	32651526	32652405	+	3	9550	83	85.8855	1.00008	3.08214	2.01023e-07	0.157037	9.999e-05	3.79648e-07
ALU-NREF_2551	19	57023579	57023579	ALU	ENSG00000196867	19	57050318	57068169	+	2	-26739	442	448.831	1.00001	2.03105	2.51539e-08	0.35307	9.999e-05	3.98824e-08	ZFP28	267435	19	57049505	57050591	+	2	-25926	83	83.3566	1.00003	2.00707	1.20215e-05	0.306631	0.00019998	2.30965e-05
ALU-NREF_2551	19	57023579	57023579	ALU	ENSG00000197016	19	57078881	57100279	+	2	-55302	442	442.335	1.00001	2.02324	3.5016e-09	0.321231	9.999e-05	6.98819e-09	ZNF470	267435	19	57049505	57050591	+	2	-25926	83	83.3566	1.00003	2.00707	1.20215e-05	0.306631	0.00019998	2.30965e-05
ALU-NREF_247	2	26473946	26473946	ALU	ENSG00000084754	2	26413505	26513336	-	2	0	442	432.784	0.999992	1.96559	4.28906e-05	-0.272675	9.999e-05	0.000101366	HADHA	25555	2	26401619	26402702	+	2	71244	83	85.9828	0.999929	2.02348	5.85405e-06	-0.216206	9.999e-05	8.04673e-06
ALU-NREF_258	2	43024076	43024076	ALU	ENSG00000226491	2	43024366	43025852	-	1	290	442	453.525	0.999995	1.00852	1.31545e-15	-0.420412	9.999e-05	5.6919e-16	FTOP1	27148	2	43022997	43023571	+	1	505	83	82.7082	0.999988	0.997028	6.35461e-08	-0.143823	9.999e-05	6.68446e-08
ALU-NREF_258	2	43024076	43024076	ALU	ENSG00000226491	2	43024366	43025852	-	1	290	442	453.525	0.999995	1.00852	1.31545e-15	-0.420412	9.999e-05	5.6919e-16	FTOP1	27149	2	43023647	43024216	+	1	0	83	82.3191	0.999934	0.996629	5.19745e-19	-0.346109	9.999e-05	7.23453e-19
ALU-NREF_304	2	80769024	80769024	ALU	ENSG00000066032	2	79412358	80875905	+	5	0	442	442.852	1.00001	4.89669	3.6562e-06	-0.240138	9.999e-05	1.75192e-05	CTNNA2	30727	2	80733196	80734308	+	1	34716	83	79.0445	0.999976	0.972955	4.01671e-07	-0.216641	9.999e-05	7.40344e-07
ALU-NREF_304	2	80769024	80769024	ALU	ENSG00000066032	2	79412358	80875905	+	5	0	442	442.852	1.00001	4.89669	3.6562e-06	-0.240138	9.999e-05	1.75192e-05	CTNNA2	30730	2	80746466	80747390	+	1	21634	83	81.0547	0.999995	0.985068	4.85452e-08	-0.301246	9.999e-05	6.86975e-08
ALU-NREF_304	2	80769024	80769024	ALU	ENSG00000066032	2	79412358	80875905	+	5	0	442	442.852	1.00001	4.89669	3.6562e-06	-0.240138	9.999e-05	1.75192e-05	CTNNA2	30732	2	80752107	80752851	+	1	16173	83	81.1357	0.999972	1.00616	2.08896e-12	-0.46899	9.999e-05	3.71542e-12
ALU-NREF_304	2	80769024	80769024	ALU	ENSG00000066032	2	79412358	80875905	+	5	0	442	442.852	1.00001	4.89669	3.6562e-06	-0.240138	9.999e-05	1.75192e-05	CTNNA2	30733	2	80754224	80754702	+	1	14322	83	81.849	1.00006	0.994103	2.93383e-08	-0.361478	9.999e-05	3.63462e-08
ALU-NREF_304	2	80769024	80769024	ALU	ENSG00000066032	2	79412358	80875905	+	5	0	442	442.852	1.00001	4.89669	3.6562e-06	-0.240138	9.999e-05	1.75192e-05	CTNNA2	30734	2	80756664	80758043	+	1	10981	83	82.0922	1.00007	1.00797	2.02848e-09	-0.363707	9.999e-05	2.50118e-09
ALU-NREF_304	2	80769024	80769024	ALU	ENSG00000066032	2	79412358	80875905	+	5	0	442	442.852	1.00001	4.89669	3.6562e-06	-0.240138	9.999e-05	1.75192e-05	CTNNA2	30735	2	80758468	80758749	+	1	10275	83	83.9078	1.00003	0.986059	4.19944e-11	-0.456655	9.999e-05	3.2398e-11
ALU-NREF_309	2	98582157	98582157	ALU	ENSG00000135976	2	97779234	97930258	+	1	651899	442	436.033	0.999997	0.987028	2.65552e-05	0.168539	0.00019998	2.97153e-05	ANKRD36	31757	2	97866350	97867074	+	1	715083	83	84.0537	0.999987	1.0083	4.84043e-08	0.249551	9.999e-05	4.01236e-08
ALU-NREF_309	2	98582157	98582157	ALU	ENSG00000135976	2	97779234	97930258	+	1	651899	442	436.033	0.999997	0.987028	2.65552e-05	0.168539	0.00019998	2.97153e-05	ANKRD36	31760	2	98205968	98207533	+	1	374624	83	81.0223	0.999942	1.0014	3.81894e-05	-0.0778274	0.00029997	4.74071e-05
ALU-NREF_309	2	98582157	98582157	ALU	ENSG00000135976	2	97779234	97930258	+	1	651899	442	436.033	0.999997	0.987028	2.65552e-05	0.168539	0.00019998	2.97153e-05	ANKRD36	31779	2	98384591	98385647	+	1	196510	83	84.9129	1.00002	1.00508	3.89544e-08	0.239073	9.999e-05	2.72816e-08
ALU-REF_64	2	99752965	99752965	ALU	ENSG00000135951	2	99613725	100106497	-	1	0	442	449.942	0.999993	1.00391	2.35416e-11	-0.390972	9.999e-05	1.56845e-11	TSGA10	31899	2	99757350	99758379	+	1	-4385	83	84.2807	1.00003	1.01375	1.07608e-06	-0.052656	9.999e-05	9.00145e-07
ALU-REF_64	2	99752965	99752965	ALU	ENSG00000135951	2	99613725	100106497	-	1	0	442	449.942	0.999993	1.00391	2.35416e-11	-0.390972	9.999e-05	1.56845e-11	TSGA10	31925	2	100106306	100107227	+	1	-353341	83	82.5299	0.99997	1.01901	9.54432e-06	-0.0554816	9.999e-05	1.03148e-05
ALU-NREF_369	2	178351472	178351472	ALU	ENSG00000197557	2	178477721	178483694	-	5	126249	442	439.41	1.00001	4.29737	0.000129	0.197083	0.00039996	0.00058005	TTC30A	40665	2	178371601	178372753	+	5	-20129	83	86.4205	1.00002	4.33901	3.85174e-05	-0.234832	0.00039996	0.000115459
L1-NREF_29	2	191478717	191478717	L1	ENSG00000151690	2	191273082	191399448	+	1	79269	442	439.68	1	1.00666	1.89377e-14	-0.525011	9.999e-05	2.22933e-14	MFSD6	43141	2	191329614	191330355	+	1	148362	83	84.4752	1	1.00741	9.29129e-08	-0.27656	9.999e-05	7.19397e-08
L1-NREF_29	2	191478717	191478717	L1	ENSG00000151690	2	191273082	191399448	+	1	79269	442	439.68	1	1.00666	1.89377e-14	-0.525011	9.999e-05	2.22933e-14	MFSD6	43142	2	191332356	191332870	+	1	145847	83	81.541	1.00004	0.984758	7.01831e-10	-0.273126	9.999e-05	9.74686e-10
L1-NREF_29	2	191478717	191478717	L1	ENSG00000151690	2	191273082	191399448	+	1	79269	442	439.68	1	1.00666	1.89377e-14	-0.525011	9.999e-05	2.22933e-14	MFSD6	43143	2	191333489	191334308	+	1	144409	83	83.9078	0.999979	0.997262	2.42879e-05	-0.277414	9.999e-05	2.18555e-05
L1-NREF_29	2	191478717	191478717	L1	ENSG00000151690	2	191273082	191399448	+	1	79269	442	439.68	1	1.00666	1.89377e-14	-0.525011	9.999e-05	2.22933e-14	MFSD6	43144	2	191334622	191334836	+	1	143881	83	82.5137	1.00001	0.99112	3.04755e-07	-0.349384	9.999e-05	3.27183e-07
L1-NREF_29	2	191478717	191478717	L1	ENSG00000151690	2	191273082	191399448	+	1	79269	442	439.68	1	1.00666	1.89377e-14	-0.525011	9.999e-05	2.22933e-14	MFSD6	43159	2	191398628	191399913	+	1	78804	83	83.4863	1.00004	1.01492	3.09936e-06	-0.0678424	9.999e-05	2.9407e-06
L1-NREF_29	2	191478717	191478717	L1	ENSG00000151690	2	191273082	191399448	+	1	79269	442	439.68	1	1.00666	1.89377e-14	-0.525011	9.999e-05	2.22933e-14	MFSD6	43171	2	191453124	191454291	+	1	24426	83	81.0385	1.00005	0.966566	9.92975e-06	-0.167034	9.999e-05	1.22316e-05
ALU-NREF_2579	20	34458566	34458566	ALU	ENSG00000214078	20	34213954	34288906	-	2	-169660	442	443.058	1	1.98908	1.63668e-36	-1.04585	9.999e-05	2.68706e-36	CPNE1	270156	20	34644653	34645325	+	2	-186087	83	83.7781	0.999994	2.03347	2.72738e-07	0.480044	9.999e-05	4.87511e-07
ALU-REF_890	22	42140479	42140479	ALU	ENSG00000100401	22	41641616	41682255	-	1	-458224	442	462.568	0.999999	1.0147	0.00146934	-0.142564	0.00109989	0.00115499	RANGAP1	276585	22	41801577	41802106	+	1	338373	83	81.4924	1.00005	0.991671	5.48821e-05	0.219584	9.999e-05	6.36436e-05
ALU-REF_890	22	42140479	42140479	ALU	ENSG00000100401	22	41641616	41682255	-	1	-458224	442	462.568	0.999999	1.0147	0.00146934	-0.142564	0.00109989	0.00115499	RANGAP1	276616	22	42148015	42148945	+	1	-7536	83	83.7133	1.00003	1.01039	9.62548e-06	0.162505	9.999e-05	8.89804e-06
ALU-REF_890	22	42140479	42140479	ALU	ENSG00000167074	22	41763338	41795330	+	1	345149	442	437.198	1.00001	1.00556	3.42008e-17	0.529456	9.999e-05	5.08796e-17	TEF	276585	22	41801577	41802106	+	1	338373	83	81.4924	1.00005	0.991671	5.48821e-05	0.219584	9.999e-05	6.36436e-05
ALU-REF_890	22	42140479	42140479	ALU	ENSG00000167074	22	41763338	41795330	+	1	345149	442	437.198	1.00001	1.00556	3.42008e-17	0.529456	9.999e-05	5.08796e-17	TEF	276616	22	42148015	42148945	+	1	-7536	83	83.7133	1.00003	1.01039	9.62548e-06	0.162505	9.999e-05	8.89804e-06
ALU-REF_890	22	42140479	42140479	ALU	ENSG00000167077	22	42095504	42195460	+	1	0	442	440.058	0.999991	1.00494	5.13504e-10	0.379347	9.999e-05	5.63096e-10	MEI1	276585	22	41801577	41802106	+	1	338373	83	81.4924	1.00005	0.991671	5.48821e-05	0.219584	9.999e-05	6.36436e-05
ALU-REF_890	22	42140479	42140479	ALU	ENSG00000167077	22	42095504	42195460	+	1	0	442	440.058	0.999991	1.00494	5.13504e-10	0.379347	9.999e-05	5.63096e-10	MEI1	276616	22	42148015	42148945	+	1	-7536	83	83.7133	1.00003	1.01039	9.62548e-06	0.162505	9.999e-05	8.89804e-06
ALU-REF_890	22	42140479	42140479	ALU	ENSG00000196419	22	42017124	42060044	+	1	80435	442	428.026	0.999991	1.00304	0.000584435	-0.113804	0.00059994	0.000716916	XRCC6	276585	22	41801577	41802106	+	1	338373	83	81.4924	1.00005	0.991671	5.48821e-05	0.219584	9.999e-05	6.36436e-05
ALU-REF_890	22	42140479	42140479	ALU	ENSG00000196419	22	42017124	42060044	+	1	80435	442	428.026	0.999991	1.00304	0.000584435	-0.113804	0.00059994	0.000716916	XRCC6	276616	22	42148015	42148945	+	1	-7536	83	83.7133	1.00003	1.01039	9.62548e-06	0.162505	9.999e-05	8.89804e-06
ALU-NREF_485	3	45542662	45542662	ALU	ENSG00000011376	3	45429999	45590913	+	3	0	442	450.6	0.999996	3.01478	5.46955e-09	0.206108	9.999e-05	1.17323e-08	LARS2	56063	3	45594864	45595570	+	3	-52202	83	83.1459	0.999994	2.98091	1.54486e-07	0.170649	9.999e-05	4.49102e-07
ALU-NREF_488	3	48372326	48372326	ALU	ENSG00000164048	3	48282591	48343175	+	1	29151	442	440.716	1	0.992945	7.85188e-05	0.22246	9.999e-05	7.98552e-05	ZNF589	56349	3	48347602	48348939	+	1	23387	83	82.9838	0.999989	1.0042	1.48601e-12	0.33161	9.999e-05	1.50022e-12
ALU-NREF_514	3	101432386	101432386	ALU	ENSG00000182504	3	101442770	101489406	+	1	-10384	442	438.18	0.999993	1.00275	0.000900123	-0.101996	0.00139986	0.000950309	CEP97	60672	3	101334213	101335432	+	2	96954	83	84.2482	1.00003	2.0249	2.43895e-06	0.249625	9.999e-05	4.1445e-06
ALU-NREF_528	3	107893335	107893335	ALU	ENSG00000196776	3	107762146	107809872	-	1	-83463	442	453.795	0.999998	0.996402	0.00121443	0.271449	0.00159984	0.00104023	CD47	61508	3	107418398	107418990	+	1	474345	83	82.3354	1.00005	0.984173	6.45344e-05	0.256522	0.00029997	6.79467e-05
ALU-REF_149	3	185017331	185017331	ALU	ENSG00000073803	3	185000730	185216845	+	2	0	442	438.806	1.00001	1.95395	7.81244e-09	-0.367291	9.999e-05	1.72778e-08	MAP3K13	71548	3	185016909	185017345	+	2	0	83	83.4215	1	1.98403	3.20221e-13	-0.330218	9.999e-05	5.53372e-13
ALU-REF_149	3	185017331	185017331	ALU	ENSG00000073803	3	185000730	185216845	+	2	0	442	438.806	1.00001	1.95395	7.81244e-09	-0.367291	9.999e-05	1.72778e-08	MAP3K13	71549	3	185017501	185018160	+	2	-170	83	83.5512	0.999912	1.98254	1.39257e-15	-0.316536	9.999e-05	2.2307e-15
ALU-REF_149	3	185017331	185017331	ALU	ENSG00000073803	3	185000730	185216845	+	2	0	442	438.806	1.00001	1.95395	7.81244e-09	-0.367291	9.999e-05	1.72778e-08	MAP3K13	71551	3	185025797	185026413	+	2	-8466	83	81.9625	1	1.96626	8.64162e-06	-0.14283	9.999e-05	1.93539e-05
ALU-REF_149	3	185017331	185017331	ALU	ENSG00000113790	3	184908413	184999778	-	2	-17553	442	444.007	1	2.00698	2.78277e-05	-0.27949	0.00019998	5.35503e-05	EHHADH	71548	3	185016909	185017345	+	2	0	83	83.4215	1	1.98403	3.20221e-13	-0.330218	9.999e-05	5.53372e-13
ALU-REF_149	3	185017331	185017331	ALU	ENSG00000113790	3	184908413	184999778	-	2	-17553	442	444.007	1	2.00698	2.78277e-05	-0.27949	0.00019998	5.35503e-05	EHHADH	71549	3	185017501	185018160	+	2	-170	83	83.5512	0.999912	1.98254	1.39257e-15	-0.316536	9.999e-05	2.2307e-15
ALU-REF_149	3	185017331	185017331	ALU	ENSG00000113790	3	184908413	184999778	-	2	-17553	442	444.007	1	2.00698	2.78277e-05	-0.27949	0.00019998	5.35503e-05	EHHADH	71551	3	185025797	185026413	+	2	-8466	83	81.9625	1	1.96626	8.64162e-06	-0.14283	9.999e-05	1.93539e-05
L1-NREF_51	3	193354185	193354185	L1	ENSG00000127249	3	193119867	193310900	-	4	-43285	442	441.255	1.00001	4.00723	3.34669e-12	-0.43507	9.999e-05	1.39775e-11	ATP13A4	72468	3	193164595	193165370	+	4	188815	83	80.9898	0.999919	3.94726	6.55357e-06	-0.220939	9.999e-05	3.35391e-05
ALU-NREF_638	4	47496529	47496529	ALU	ENSG00000145246	4	47487306	47595503	+	2	0	442	433.788	0.999996	1.98048	7.32253e-06	-0.208875	9.999e-05	1.76361e-05	ATP10D	77516	4	47495276	47496420	+	2	109	83	83.3404	0.999998	2.00635	2.47099e-07	-0.111426	9.999e-05	4.6838e-07
ALU-NREF_640	4	56371962	56371962	ALU	ENSG00000128039	4	56212277	56239263	+	4	132699	442	435.558	0.999991	3.97219	2.13443e-13	0.40706	9.999e-05	1.26535e-12	SRD5A3	78250	4	56411874	56412498	+	4	-39912	83	84.4752	1.00003	4.03985	2.21764e-05	-0.0348744	0.00019998	7.5643e-05
ALU-NREF_709	4	120639904	120639904	ALU	ENSG00000249244	4	120312987	120316490	-	4	-323414	442	443.522	0.999988	3.95599	0.000311844	-0.190527	0.00119988	0.00120405	RP11-548H18.2	86383	4	120375445	120376299	+	4	263605	83	82.3354	1.00002	3.89526	2.70199e-07	0.0562446	9.999e-05	1.17492e-06
L1-REF_40	4	152340708	152340708	L1	ENSG00000059691	4	152591657	152682175	-	2	250949	442	450.374	1.00001	2.02727	5.07064e-11	-0.283522	9.999e-05	6.76515e-11	PET112	90955	4	152587993	152588740	+	2	-247285	83	85.4316	1.00001	2.02955	6.71469e-06	0.29069	9.999e-05	9.97291e-06
ALU-NREF_826	5	43541805	43541805	ALU	ENSG00000112992	5	43602795	43707507	+	4	-60990	442	445.378	1	3.92391	2.2395e-11	-0.349565	9.999e-05	7.3775e-11	NNT	101243	5	43363076	43364241	+	4	177564	83	85.9828	0.999943	4.04273	1.85757e-08	0.265511	9.999e-05	4.17271e-08
ALU-NREF_854	5	61857118	61857118	ALU	ENSG00000068796	5	61601990	61924409	+	4	0	442	454.55	1	3.7549	9.91668e-05	0.125647	0.00049995	0.000296413	KIF2A	102652	5	61592740	61593305	+	3	263813	83	86.3719	1.00003	2.81834	9.40642e-07	0.33409	9.999e-05	1.59142e-06
ALU-NREF_854	5	61857118	61857118	ALU	ENSG00000068796	5	61601990	61924409	+	4	0	442	454.55	1	3.7549	9.91668e-05	0.125647	0.00049995	0.000296413	KIF2A	102684	5	61797723	61798950	+	4	58168	83	87.2148	1.00007	3.83864	5.70853e-09	-0.248679	9.999e-05	8.98462e-09
ALU-NREF_856	5	63430716	63430716	ALU	ENSG00000164197	5	63461672	63668696	+	3	-30956	442	448.529	0.999992	3.05648	3.99136e-05	-0.332854	0.00059994	0.000106975	RNF180	102865	5	63457123	63458014	+	3	-26407	83	80.8926	1.00003	2.98061	1.27127e-05	-0.24184	0.00019998	4.88879e-05
ALU-NREF_856	5	63430716	63430716	ALU	ENSG00000164197	5	63461672	63668696	+	3	-30956	442	448.529	0.999992	3.05648	3.99136e-05	-0.332854	0.00059994	0.000106975	RNF180	102866	5	63461259	63462428	+	3	-30543	83	81.9625	0.999957	3.03888	4.68187e-06	-0.272282	0.00019998	1.63347e-05
ALU-NREF_856	5	63430716	63430716	ALU	ENSG00000164197	5	63461672	63668696	+	3	-30956	442	448.529	0.999992	3.05648	3.99136e-05	-0.332854	0.00059994	0.000106975	RNF180	102868	5	63476406	63477564	+	3	-45690	83	83.1945	1	2.99483	9.57943e-06	-0.245092	9.999e-05	2.80019e-05
ALU-NREF_856	5	63430716	63430716	ALU	ENSG00000164197	5	63461672	63668696	+	3	-30956	442	448.529	0.999992	3.05648	3.99136e-05	-0.332854	0.00059994	0.000106975	RNF180	102872	5	63484570	63485132	+	3	-53854	83	81.8004	0.999986	2.9198	2.08617e-06	-0.312145	9.999e-05	7.22431e-06
ALU-NREF_856	5	63430716	63430716	ALU	ENSG00000164197	5	63461672	63668696	+	3	-30956	442	448.529	0.999992	3.05648	3.99136e-05	-0.332854	0.00059994	0.000106975	RNF180	102873	5	63486334	63487226	+	3	-55618	83	84.4428	0.999984	3.03921	6.43522e-08	-0.426797	9.999e-05	1.50287e-07
ALU-NREF_856	5	63430716	63430716	ALU	ENSG00000164197	5	63461672	63668696	+	3	-30956	442	448.529	0.999992	3.05648	3.99136e-05	-0.332854	0.00059994	0.000106975	RNF180	102875	5	63494823	63495727	+	3	-64107	83	81.5896	0.999915	2.998	2.02748e-05	-0.244694	0.00019998	7.16086e-05
ALU-REF_279	5	80039372	80039372	ALU	ENSG00000228716	5	79922048	80172279	-	3	0	442	447.719	0.999991	3.00137	6.15703e-05	-0.216292	0.00019998	0.000165585	DHFR	104004	5	79950244	79951206	+	2	88166	83	82.8865	1.00008	2.00163	1.15501e-06	0.0523073	9.999e-05	2.34894e-06
ALU-REF_299	5	102163355	102163355	ALU	ENSG00000145730	5	102089686	102366809	+	1	0	442	441.245	1	1.00826	0.0010625	-0.171081	0.00149985	0.00108192	PAM	107350	5	102082905	102083954	+	1	79401	83	82.2543	0.999958	1.00716	3.53596e-06	-0.253781	9.999e-05	3.94321e-06
ALU-REF_299	5	102163355	102163355	ALU	ENSG00000145730	5	102089686	102366809	+	1	0	442	441.245	1	1.00826	0.0010625	-0.171081	0.00149985	0.00108192	PAM	107458	5	102596568	102597140	+	2	-433213	83	84.7994	1.00007	2.02353	9.10161e-05	-0.114684	0.00029997	0.000154234
ALU-NREF_980	6	26962174	26962174	ALU	ENSG00000182952	6	26538634	26546482	+	1	415692	442	442.011	1	0.995973	4.98425e-06	-0.264825	9.999e-05	4.96266e-06	HMGN4	120464	6	26923816	26925023	+	2	37151	83	82.2381	1.00008	2.00954	1.40651e-07	-0.110794	9.999e-05	3.22253e-07
ALU-NREF_980	6	26962174	26962174	ALU	ENSG00000186470	6	26365388	26378546	+	2	583628	442	434.856	0.999993	1.96091	0.000458051	-0.212397	0.00089991	0.000998949	BTN3A2	120464	6	26923816	26925023	+	2	37151	83	82.2381	1.00008	2.00954	1.40651e-07	-0.110794	9.999e-05	3.22253e-07
ALU-NREF_980	6	26962174	26962174	ALU	ENSG00000241549	6	26839264	26924333	-	2	-37841	442	437.727	1.00001	1.97778	0.00018594	-0.237819	0.00079992	0.000395121	GUSBP2	120464	6	26923816	26925023	+	2	37151	83	82.2381	1.00008	2.00954	1.40651e-07	-0.110794	9.999e-05	3.22253e-07
ALU-REF_349	6	28190196	28190196	ALU	ENSG00000187987	6	28399708	28411279	-	3	209512	442	438.579	0.999998	2.99585	3.02577e-08	-0.237899	9.999e-05	1.02471e-07	ZSCAN23	120624	6	28410900	28411603	+	3	-220704	83	85.9342	1.00009	3.04822	8.81689e-06	-0.153902	9.999e-05	1.8596e-05
ALU-REF_349	6	28190196	28190196	ALU	ENSG00000197062	6	28234789	28245974	+	2	-44593	442	451.097	0.999995	2.02108	2.99003e-05	0.186138	9.999e-05	5.00366e-05	RP5-874C20.3	120624	6	28410900	28411603	+	3	-220704	83	85.9342	1.00009	3.04822	8.81689e-06	-0.153902	9.999e-05	1.8596e-05
ALU-REF_349	6	28190196	28190196	ALU	ENSG00000216901	6	28143967	28144452	+	2	45744	442	440.273	0.999993	1.97982	5.21882e-14	-0.398078	9.999e-05	1.15669e-13	AL022393.7	120624	6	28410900	28411603	+	3	-220704	83	85.9342	1.00009	3.04822	8.81689e-06	-0.153902	9.999e-05	1.8596e-05
ALU-NREF_1013	6	45260479	45260479	ALU	ENSG00000196284	6	44777055	45632086	-	4	0	442	433.799	0.999992	3.88247	2.36293e-05	-0.264865	9.999e-05	0.000109237	SUPT3H	122226	6	44900383	44901597	+	2	358882	83	82.384	1.00005	1.97706	2.96609e-05	-0.309955	9.999e-05	6.27643e-05
ALU-REF_371	6	86144299	86144299	ALU	ENSG00000135318	6	86159810	86205500	+	4	-15511	442	449.446	1.00001	4.1758	5.13306e-15	0.586437	9.999e-05	1.26845e-14	NT5E	127168	6	86159057	86160365	+	4	-14758	83	82.9676	0.999979	3.89912	1.5166e-18	0.317283	9.999e-05	6.00998e-18
ALU-REF_371	6	86144299	86144299	ALU	ENSG00000135318	6	86159810	86205500	+	4	-15511	442	449.446	1.00001	4.1758	5.13306e-15	0.586437	9.999e-05	1.26845e-14	NT5E	127169	6	86162957	86163734	+	4	-18658	83	84.5076	1.00003	3.99551	6.03815e-08	0.273765	9.999e-05	1.82849e-07
ALU-REF_371	6	86144299	86144299	ALU	ENSG00000135318	6	86159810	86205500	+	4	-15511	442	449.446	1.00001	4.1758	5.13306e-15	0.586437	9.999e-05	1.26845e-14	NT5E	127170	6	86165314	86165786	+	4	-21015	83	83.3729	1.00008	3.90732	4.81229e-06	0.250455	9.999e-05	1.78818e-05
ALU-REF_381	6	111295214	111295214	ALU	ENSG00000155115	6	111279764	111289093	+	2	6121	442	443.424	0.999996	2.00541	7.57783e-05	0.210362	0.00039996	0.00014796	GTF3C6	130449	6	111194526	111194722	+	2	100492	83	87.8795	0.999954	2.05737	5.2578e-05	0.411535	0.00029997	6.50132e-05
ALU-REF_383	6	116750814	116750814	ALU	ENSG00000188820	6	116782534	116784934	+	4	-31720	442	451.68	1	3.64101	2.12245e-14	-0.457843	9.999e-05	4.0306e-14	FAM26F	131407	6	116782973	116784089	+	4	-32159	83	83.9889	1.00005	3.65372	5.20336e-08	-0.156305	9.999e-05	1.58157e-07
ALU-REF_383	6	116750814	116750814	ALU	ENSG00000188820	6	116782534	116784934	+	4	-31720	442	451.68	1	3.64101	2.12245e-14	-0.457843	9.999e-05	4.0306e-14	FAM26F	131408	6	116786319	116786976	+	4	-35505	83	83.0324	1.0001	3.59503	4.44087e-06	-0.141297	9.999e-05	1.58789e-05
ALU-NREF_1141	6	130614798	130614798	ALU	ENSG00000164484	6	130686880	130764208	+	10	-72082	442	459.784	0.959836	9.85969	2.5129e-19	-0.495254	9.999e-05	2.63758e-18	TMEM200A	133861	6	130523825	130525004	+	10	89794	83	80.7629	1.01769	9.17175	6.82008e-06	-0.221037	9.999e-05	7.01249e-05
ALU-NREF_1141	6	130614798	130614798	ALU	ENSG00000164484	6	130686880	130764208	+	10	-72082	442	459.784	0.959836	9.85969	2.5129e-19	-0.495254	9.999e-05	2.63758e-18	TMEM200A	133866	6	130581095	130582506	+	10	32292	83	82.1246	0.945273	8.5925	5.43074e-06	-0.107626	0.00039996	9.14913e-05
ALU-NREF_1141	6	130614798	130614798	ALU	ENSG00000164484	6	130686880	130764208	+	10	-72082	442	459.784	0.959836	9.85969	2.5129e-19	-0.495254	9.999e-05	2.63758e-18	TMEM200A	133869	6	130591128	130591932	+	10	22866	83	82.465	0.973729	9.03901	3.81612e-15	-0.580723	9.999e-05	9.58422e-14
ALU-NREF_1141	6	130614798	130614798	ALU	ENSG00000164484	6	130686880	130764208	+	10	-72082	442	459.784	0.959836	9.85969	2.5129e-19	-0.495254	9.999e-05	2.63758e-18	TMEM200A	133870	6	130597971	130600947	+	10	13851	83	83.8916	0.980768	9.42903	1.37226e-08	-0.190494	9.999e-05	1.48289e-07
ALU-NREF_1141	6	130614798	130614798	ALU	ENSG00000164484	6	130686880	130764208	+	10	-72082	442	459.784	0.959836	9.85969	2.5129e-19	-0.495254	9.999e-05	2.63758e-18	TMEM200A	133871	6	130603224	130604007	+	10	10791	83	82.9189	0.98143	9.24195	5.5546e-08	-0.187206	9.999e-05	6.86323e-07
ALU-NREF_1141	6	130614798	130614798	ALU	ENSG00000164484	6	130686880	130764208	+	10	-72082	442	459.784	0.959836	9.85969	2.5129e-19	-0.495254	9.999e-05	2.63758e-18	TMEM200A	133874	6	130614791	130615416	+	10	0	83	82.157	0.977391	9.25593	4.85894e-07	-0.166518	9.999e-05	6.82888e-06
ALU-NREF_1141	6	130614798	130614798	ALU	ENSG00000164484	6	130686880	130764208	+	10	-72082	442	459.784	0.959836	9.85969	2.5129e-19	-0.495254	9.999e-05	2.63758e-18	TMEM200A	133876	6	130627383	130628028	+	10	-12585	83	83.1783	0.987886	9.41846	2.15103e-11	-0.3481	9.999e-05	2.53958e-10
ALU-NREF_1141	6	130614798	130614798	ALU	ENSG00000164484	6	130686880	130764208	+	10	-72082	442	459.784	0.959836	9.85969	2.5129e-19	-0.495254	9.999e-05	2.63758e-18	TMEM200A	133878	6	130630169	130630792	+	10	-15371	83	83.3404	0.973559	9.15396	3.09143e-10	-0.336508	9.999e-05	4.4317e-09
ALU-NREF_1141	6	130614798	130614798	ALU	ENSG00000164484	6	130686880	130764208	+	10	-72082	442	459.784	0.959836	9.85969	2.5129e-19	-0.495254	9.999e-05	2.63758e-18	TMEM200A	133885	6	130686264	130687141	+	10	-71466	83	82.0273	0.982471	9.07042	3.59581e-09	-0.216015	9.999e-05	5.46278e-08
ALU-NREF_1141	6	130614798	130614798	ALU	ENSG00000164484	6	130686880	130764208	+	10	-72082	442	459.784	0.959836	9.85969	2.5129e-19	-0.495254	9.999e-05	2.63758e-18	TMEM200A	133886	6	130687371	130688083	+	10	-72573	83	83.7619	0.983907	9.35476	1.52993e-08	-0.257808	9.999e-05	1.59734e-07
ALU-NREF_1141	6	130614798	130614798	ALU	ENSG00000164484	6	130686880	130764208	+	10	-72082	442	459.784	0.959836	9.85969	2.5129e-19	-0.495254	9.999e-05	2.63758e-18	TMEM200A	133890	6	130702514	130703593	+	10	-87716	83	83.5998	0.987322	9.35169	1.89444e-12	-0.318516	9.999e-05	2.03204e-11
ALU-NREF_1141	6	130614798	130614798	ALU	ENSG00000164484	6	130686880	130764208	+	10	-72082	442	459.784	0.959836	9.85969	2.5129e-19	-0.495254	9.999e-05	2.63758e-18	TMEM200A	133892	6	130717843	130718376	+	10	-103045	83	81.5896	0.990924	8.93459	5.09943e-08	-0.391006	9.999e-05	6.76446e-07
ALU-NREF_1200	7	22853492	22853492	ALU	ENSG00000196683	7	22852252	22862470	-	2	0	442	443.025	1	2.0198	0.000238504	-0.141945	9.999e-05	0.00047369	TOMM7	142128	7	22862024	22862827	+	2	-8532	83	80.5846	0.999985	1.98047	1.93468e-05	-0.0666093	9.999e-05	5.07389e-05
ALU-NREF_1201	7	23665685	23665685	ALU	ENSG00000169193	7	23636999	23684327	+	3	0	442	447.946	1.00001	2.96007	5.26452e-48	0.913424	9.999e-05	3.71309e-48	CCDC126	142187	7	23369154	23369819	+	2	295866	83	83.0811	0.999911	2.01578	4.38462e-05	-0.221893	0.00019998	8.76959e-05
ALU-NREF_1201	7	23665685	23665685	ALU	ENSG00000169193	7	23636999	23684327	+	3	0	442	447.946	1.00001	2.96007	5.26452e-48	0.913424	9.999e-05	3.71309e-48	CCDC126	142223	7	23633387	23633595	+	2	32090	83	81.7842	0.999924	2.01985	5.52498e-12	0.217285	9.999e-05	1.59775e-11
ALU-NREF_1201	7	23665685	23665685	ALU	ENSG00000169193	7	23636999	23684327	+	3	0	442	447.946	1.00001	2.96007	5.26452e-48	0.913424	9.999e-05	3.71309e-48	CCDC126	142224	7	23634601	23635309	+	2	30376	83	81.7355	1.00002	1.9875	1.00264e-27	0.456112	9.999e-05	4.99069e-27
ALU-NREF_1201	7	23665685	23665685	ALU	ENSG00000169193	7	23636999	23684327	+	3	0	442	447.946	1.00001	2.96007	5.26452e-48	0.913424	9.999e-05	3.71309e-48	CCDC126	142226	7	23640629	23641094	+	2	24591	83	84.3455	1.00002	2.01395	6.68284e-12	0.386129	9.999e-05	9.09173e-12
ALU-NREF_1201	7	23665685	23665685	ALU	ENSG00000169193	7	23636999	23684327	+	3	0	442	447.946	1.00001	2.96007	5.26452e-48	0.913424	9.999e-05	3.71309e-48	CCDC126	142227	7	23642989	23643960	+	2	21725	83	83.924	1.00002	2.03234	1.10196e-09	0.27356	9.999e-05	1.80869e-09
ALU-NREF_1201	7	23665685	23665685	ALU	ENSG00000188732	7	23719750	23742868	+	3	-54065	442	438.86	1.00001	2.93759	1.19137e-07	0.358422	9.999e-05	3.87925e-07	FAM221A	142187	7	23369154	23369819	+	2	295866	83	83.0811	0.999911	2.01578	4.38462e-05	-0.221893	0.00019998	8.76959e-05
ALU-NREF_1201	7	23665685	23665685	ALU	ENSG00000188732	7	23719750	23742868	+	3	-54065	442	438.86	1.00001	2.93759	1.19137e-07	0.358422	9.999e-05	3.87925e-07	FAM221A	142223	7	23633387	23633595	+	2	32090	83	81.7842	0.999924	2.01985	5.52498e-12	0.217285	9.999e-05	1.59775e-11
ALU-NREF_1201	7	23665685	23665685	ALU	ENSG00000188732	7	23719750	23742868	+	3	-54065	442	438.86	1.00001	2.93759	1.19137e-07	0.358422	9.999e-05	3.87925e-07	FAM221A	142224	7	23634601	23635309	+	2	30376	83	81.7355	1.00002	1.9875	1.00264e-27	0.456112	9.999e-05	4.99069e-27
ALU-NREF_1201	7	23665685	23665685	ALU	ENSG00000188732	7	23719750	23742868	+	3	-54065	442	438.86	1.00001	2.93759	1.19137e-07	0.358422	9.999e-05	3.87925e-07	FAM221A	142226	7	23640629	23641094	+	2	24591	83	84.3455	1.00002	2.01395	6.68284e-12	0.386129	9.999e-05	9.09173e-12
ALU-NREF_1201	7	23665685	23665685	ALU	ENSG00000188732	7	23719750	23742868	+	3	-54065	442	438.86	1.00001	2.93759	1.19137e-07	0.358422	9.999e-05	3.87925e-07	FAM221A	142227	7	23642989	23643960	+	2	21725	83	83.924	1.00002	2.03234	1.10196e-09	0.27356	9.999e-05	1.80869e-09
ALU-NREF_1243	7	63880180	63880180	ALU	ENSG00000227986	7	63815457	63816577	+	1	63603	442	441.406	0.999997	1.00575	5.61064e-07	0.350533	9.999e-05	5.74249e-07	TRIM60P18	145301	7	63757634	63758335	+	1	121845	83	85.2857	0.999976	1.01764	1.51711e-07	-0.28005	9.999e-05	1.04085e-07
ALU-NREF_1243	7	63880180	63880180	ALU	ENSG00000227986	7	63815457	63816577	+	1	63603	442	441.406	0.999997	1.00575	5.61064e-07	0.350533	9.999e-05	5.74249e-07	TRIM60P18	145316	7	63968665	63969668	+	1	-88485	83	84.0213	0.999982	0.994625	2.07657e-05	-0.2145	9.999e-05	1.83637e-05
ALU-NREF_1243	7	63880180	63880180	ALU	ENSG00000227986	7	63815457	63816577	+	1	63603	442	441.406	0.999997	1.00575	5.61064e-07	0.350533	9.999e-05	5.74249e-07	TRIM60P18	145335	7	64146794	64147533	+	1	-266614	83	80.2117	1.00002	0.971542	1.90588e-06	-0.384343	9.999e-05	2.75948e-06
ALU-NREF_1243	7	63880180	63880180	ALU	ENSG00000228653	7	63961204	63962107	+	1	-81024	442	436.82	1	0.993309	1.45778e-05	0.327405	9.999e-05	1.62545e-05	HNRNPCP7	145301	7	63757634	63758335	+	1	121845	83	85.2857	0.999976	1.01764	1.51711e-07	-0.28005	9.999e-05	1.04085e-07
ALU-NREF_1243	7	63880180	63880180	ALU	ENSG00000228653	7	63961204	63962107	+	1	-81024	442	436.82	1	0.993309	1.45778e-05	0.327405	9.999e-05	1.62545e-05	HNRNPCP7	145316	7	63968665	63969668	+	1	-88485	83	84.0213	0.999982	0.994625	2.07657e-05	-0.2145	9.999e-05	1.83637e-05
ALU-NREF_1243	7	63880180	63880180	ALU	ENSG00000228653	7	63961204	63962107	+	1	-81024	442	436.82	1	0.993309	1.45778e-05	0.327405	9.999e-05	1.62545e-05	HNRNPCP7	145335	7	64146794	64147533	+	1	-266614	83	80.2117	1.00002	0.971542	1.90588e-06	-0.384343	9.999e-05	2.75948e-06
ALU-NREF_1251	7	76567224	76567224	ALU	ENSG00000214439	7	76713204	76751433	-	3	145980	442	439.755	1	2.94519	0.000295297	-0.248446	0.00109989	0.000900896	FAM185BP	146095	7	76090745	76091490	+	3	475734	83	85.7883	1.00006	2.87657	1.61304e-15	0.291181	9.999e-05	1.55894e-15
ALU-NREF_1251	7	76567224	76567224	ALU	ENSG00000214439	7	76713204	76751433	-	3	145980	442	439.755	1	2.94519	0.000295297	-0.248446	0.00109989	0.000900896	FAM185BP	146100	7	76115855	76116488	+	3	450736	83	86.0639	1	2.88151	6.18679e-09	0.239632	9.999e-05	9.35903e-09
ALU-NREF_1251	7	76567224	76567224	ALU	ENSG00000214439	7	76713204	76751433	-	3	145980	442	439.755	1	2.94519	0.000295297	-0.248446	0.00109989	0.000900896	FAM185BP	146132	7	76614025	76614543	+	3	-46801	83	84.848	0.999935	2.89868	2.19747e-15	-1.54554	9.999e-05	3.12373e-15
ALU-NREF_1251	7	76567224	76567224	ALU	ENSG00000214439	7	76713204	76751433	-	3	145980	442	439.755	1	2.94519	0.000295297	-0.248446	0.00109989	0.000900896	FAM185BP	146133	7	76621524	76622504	+	3	-54300	83	84.5563	0.999991	2.85416	2.70917e-06	-0.299502	9.999e-05	6.22954e-06
ALU-REF_451	7	117893951	117893951	ALU	ENSG00000128534	7	117824087	117832878	+	2	61073	442	435.061	1.00001	1.96351	0.000188938	-0.171574	0.00119988	0.000416777	NAA38	151691	7	117964765	117966255	+	2	-70814	83	81.5086	1.00008	2.00478	2.17206e-06	0.143622	0.00019998	5.37301e-06
ALU-NREF_1298	7	128209166	128209166	ALU	ENSG00000230715	7	128292896	128293719	+	4	-83730	442	442.248	1.00001	3.61459	2.51833e-10	-0.2374	9.999e-05	8.99748e-10	RP11-274B21.4	153678	7	128114246	128114605	+	4	94561	83	84.3455	1.00003	3.77572	2.61498e-05	0.222707	9.999e-05	8.4826e-05
ALU-NREF_1298	7	128209166	128209166	ALU	ENSG00000242588	7	128171753	128269512	+	4	0	442	455.316	0.999997	3.73141	7.64378e-06	-0.116232	9.999e-05	2.08021e-05	RP11-274B21.1	153678	7	128114246	128114605	+	4	94561	83	84.3455	1.00003	3.77572	2.61498e-05	0.222707	9.999e-05	8.4826e-05
ALU-NREF_1298	7	128209166	128209166	ALU	ENSG00000243679	7	128294024	128294776	+	4	-84858	442	438.007	0.999988	3.66169	8.95439e-07	-0.189789	9.999e-05	3.67305e-06	RP11-274B21.3	153678	7	128114246	128114605	+	4	94561	83	84.3455	1.00003	3.77572	2.61498e-05	0.222707	9.999e-05	8.4826e-05
ALU-NREF_1298	7	128209166	128209166	ALU	ENSG00000271529	7	128296017	128298845	-	4	86851	442	445.324	0.99999	3.77713	0.000251416	-0.123465	0.00069993	0.000899682	CICP14	153678	7	128114246	128114605	+	4	94561	83	84.3455	1.00003	3.77572	2.61498e-05	0.222707	9.999e-05	8.4826e-05
ALU-NREF_1372	8	42039906	42039906	ALU	ENSG00000070718	8	42010465	42029191	+	3	10715	442	451.982	1.00001	2.94491	5.93339e-06	0.255901	0.00019998	1.37142e-05	AP3M2	160257	8	42039703	42039938	+	3	0	83	84.1672	1.00006	2.81261	5.91166e-20	-0.573595	9.999e-05	9.11804e-20
ALU-REF_490	8	54971850	54971850	ALU	ENSG00000137547	8	55047771	55060461	+	3	-75921	442	440.986	0.999993	2.95878	8.70914e-07	0.189859	9.999e-05	2.65253e-06	MRPL15	161259	8	55047122	55048076	+	3	-75272	83	81.9625	1.00006	2.99889	1.15661e-06	0.182424	9.999e-05	4.04518e-06
ALU-NREF_1396	8	61526797	61526797	ALU	ENSG00000104388	8	61429417	61536186	+	3	0	442	440.36	0.999995	2.95901	1.53259e-10	0.345217	9.999e-05	4.90297e-10	RAB2A	161961	8	61471553	61472171	+	3	54626	83	84.8156	0.99991	3.102	4.32475e-08	0.203231	9.999e-05	9.5601e-08
ALU-NREF_1396	8	61526797	61526797	ALU	ENSG00000104388	8	61429417	61536186	+	3	0	442	440.36	0.999995	2.95901	1.53259e-10	0.345217	9.999e-05	4.90297e-10	RAB2A	161969	8	61522437	61523184	+	3	3613	83	82.8865	1.00009	3.04672	1.41218e-08	0.331702	9.999e-05	4.3948e-08
ALU-REF_504	8	91069174	91069174	ALU	ENSG00000164823	8	90914088	90940116	+	2	129058	442	438.029	1	2.00921	0.000374753	-0.184949	0.00089991	0.000800052	OSGIN2	166205	8	91121622	91122490	+	2	-52448	83	82.1084	0.999997	1.97747	6.2917e-05	0.19666	9.999e-05	0.000136325
ALU-REF_517	8	110510308	110510308	ALU	ENSG00000205038	8	110374707	110542559	+	5	0	442	439.896	1.00001	4.42478	4.97443e-78	-0.903195	9.999e-05	5.06576e-77	PKHD1L1	168824	8	110533592	110534013	+	5	-23284	83	84.1186	1.00008	4.4624	6.05821e-11	-1.01916	9.999e-05	2.00593e-10
ALU-NREF_1482	8	132942724	132942724	ALU	ENSG00000132294	8	132916336	133025889	+	4	0	442	436.119	0.999988	3.97045	5.08122e-05	0.186106	0.00059994	0.000226432	EFR3A	171930	8	132931418	132931924	+	4	10800	83	82.2219	1.00007	3.88876	8.70496e-10	0.631717	9.999e-05	4.0543e-09
ALU-NREF_1492	9	262463	262463	ALU	ENSG00000172785	9	121042	188979	-	2	-73484	442	435.105	0.999999	1.97275	7.42565e-22	0.624338	9.999e-05	3.03542e-21	CBWD1	173024	9	178789	179490	+	2	82973	83	85.2209	1.00006	2.0403	4.03914e-13	1.73435	9.999e-05	4.0006e-13
ALU-NREF_1531	9	37596348	37596348	ALU	ENSG00000137054	9	37485933	37503694	+	2	92654	442	454.129	1.00001	1.99115	6.5206e-11	-0.42043	9.999e-05	7.13191e-11	POLR1E	177180	9	37568341	37568524	+	2	27824	83	86.0477	1.00002	1.96648	7.63247e-08	0.362746	9.999e-05	8.6506e-08

## Sheet: iPSC.eQTL.0.05FDR
gene	Chr_gene	Start_gene	End_gene	strand	nb_tested	dist_Gene	MEI	Chr_MEI	Pos_MEI	Pos_MEI2	df	dummy	Beta1	Beta2	P_nominal	slope	P_empirical	P_value	Gene_name	mei
ENSG00000002016	12	1021244	1099219	-	3	33284	ALU-NREF_1896	12	987960	987960	292	294.98	0.999983	3.00963	0.000159929	-0.358244	0.00059994	0.000445478	RAD52	ALU
ENSG00000011114	14	93703897	93799438	-	1	-31503	ALU-NREF_2266	14	93830941	93830941	292	293.597	0.999996	0.99013	0.00128196	0.250893	0.00149985	0.0012309	BTBD7	ALU
ENSG00000011376	3	45429999	45590913	+	3	0	ALU-NREF_485	3	45542662	45542662	292	297.418	0.999998	2.95761	4.65811e-10	0.439204	9.999e-05	9.52139e-10	LARS2	ALU
ENSG00000011523	2	65283501	65357240	+	4	0	ALU-NREF_283	2	65333803	65333803	292	294.481	0.999975	3.93539	1.61954e-11	-1.41161	9.999e-05	5.23604e-11	CEP68	ALU
ENSG00000012779	10	45869662	45941561	+	1	133327	ALU-NREF_1661	10	46074888	46074888	292	293.069	1.00001	0.987121	0.00102028	0.523264	0.00139986	0.000985744	ALOX5	ALU
ENSG00000013583	12	13127799	13155768	-	3	194105	L1-NREF_221	12	12933694	12933694	292	294.238	0.999982	2.98308	0.00067207	0.268165	0.00219978	0.00191037	HEBP1	L1
ENSG00000019505	11	45261853	45307870	-	2	-7386	ALU-NREF_1826	11	45315256	45315256	292	285.327	0.999997	1.94293	0.00016608	0.553523	0.00049995	0.000383455	SYT13	ALU
ENSG00000036549	1	78028102	78149104	-	5	-457963	ALU-NREF_67	1	78607067	78607067	292	291.615	1	4.25183	0.000166207	-0.170427	0.0009999	0.000713548	ZZZ3	ALU
ENSG00000044459	9	17134981	17503921	+	5	-11954	ALU-NREF_1515	9	17123027	17123027	292	295.65	1.00002	4.97477	0.000279588	0.298507	0.00179982	0.0012727	CNTLN	ALU
ENSG00000047188	5	112849381	112930982	+	2	0	ALU-REF_302	5	112881417	112881417	292	294.481	0.999991	1.99065	1.12899e-14	-0.598535	9.999e-05	1.73694e-14	YTHDC2	ALU
ENSG00000051180	15	40986973	41024354	+	3	75978	ALU-NREF_2296	15	41100332	41100332	292	300.027	1.00001	3.04217	0.000215597	-0.246087	0.0009999	0.000536538	RAD51	ALU
ENSG00000053108	5	132532148	132948255	-	3	0	L1-REF_46	5	132918965	132918965	292	297.86	1.00001	3.06474	5.29274e-08	0.597575	9.999e-05	1.19307e-07	FSTL4	L1
ENSG00000057657	6	106534196	106557814	+	2	425809	ALU-REF_379	6	106983623	106983623	292	300.284	0.999995	2.01524	0.000171632	0.555086	0.00159984	0.00027948	PRDM1	ALU
ENSG00000059691	4	152591657	152682175	-	2	-50648	L1-NREF_80	4	152732823	152732823	292	302.323	0.999993	1.98892	2.28481e-05	-0.545775	9.999e-05	3.25598e-05	PET112	L1
ENSG00000065613	10	105726960	105788991	+	5	-629436	ALU-REF_604	10	105097524	105097524	292	291.344	1.00002	4.96252	7.10063e-05	0.167297	0.00049995	0.000358933	SLK	ALU
ENSG00000066405	3	137717578	137752494	+	3	92892	SVA-NREF_18	3	137845386	137845386	292	294.338	1.00002	2.82869	5.66684e-06	-0.307094	0.00319968	1.47013e-05	CLDN18	SVA
ENSG00000070061	9	111629798	111696396	-	5	-215876	ALU-NREF_1591	9	111912272	111912272	292	285.299	1.00001	4.8448	0.000238546	-0.424618	0.00109989	0.00136288	IKBKAP	ALU
ENSG00000070159	9	112137747	112260590	-	6	-803	ALU-NREF_1593	9	112261393	112261393	292	295.308	0.98483	5.86219	7.47426e-05	0.380042	0.00049995	0.000451312	PTPN3	ALU
ENSG00000070718	8	42010465	42029191	+	3	10715	ALU-NREF_1372	8	42039906	42039906	292	294.98	1.00001	2.72211	6.59114e-09	0.687698	9.999e-05	1.50309e-08	AP3M2	ALU
ENSG00000075234	22	46663859	46689905	+	2	-40808	ALU-NREF_2638	22	46623051	46623051	292	302.921	0.999987	2.01928	2.00279e-05	0.663472	9.999e-05	2.82901e-05	TTC38	ALU
ENSG00000088035	1	63833262	63904233	+	2	945946	SVA-NREF_4	1	64850179	64850179	292	289.833	0.999989	2.02911	0.000254105	0.241825	0.00049995	0.000543671	ALG6	SVA
ENSG00000088451	13	95226309	95248511	-	1	-1003	ALU-NREF_2173	13	95249514	95249514	292	297.004	0.999993	1.0052	2.1795e-08	-0.667169	9.999e-05	1.66104e-08	TGDS	ALU
ENSG00000088882	20	2774716	2781283	-	4	-82719	ALU-REF_851	20	2864002	2864002	292	296.192	0.999984	4.09055	0.000398181	-0.243743	0.00149985	0.00147833	CPXM1	ALU
ENSG00000091127	7	105080109	105162714	-	5	184520	ALU-NREF_1273	7	104895589	104895589	292	288.051	1.00002	4.90925	0.000167402	0.347524	0.00069993	0.000909635	PUS7	ALU
ENSG00000095777	10	26223197	26501456	+	7	0	ALU-NREF_1640	10	26225949	26225949	292	291.03	0.997351	6.73811	1.87883e-05	-0.505951	0.00019998	0.000133959	MYO3A	ALU
ENSG00000097046	1	91966409	91991321	+	1	-52312	L1-REF_5	1	91914097	91914097	292	294.324	1.00001	1.01927	0.00134827	0.247865	0.0009999	0.00131445	CDC7	L1
ENSG00000100122	22	26995243	27014052	-	1	0	ALU-NREF_2630	22	26997620	26997620	292	289.647	0.99999	0.996054	0.00106969	-0.364968	0.00149985	0.00111648	CRYBB1	ALU
ENSG00000100191	22	32614466	32651328	-	2	-168614	ALU-NREF_2632	22	32819942	32819942	292	334.588	1.00001	1.52694	0.00155296	-0.278115	0.00289971	0.00107516	SLC5A4	ALU
ENSG00000100220	22	32783570	32808242	-	2	-11700	ALU-NREF_2632	22	32819942	32819942	292	330.197	0.999994	1.53685	0.00173788	-0.172754	0.00349965	0.00133165	RTCB	ALU
ENSG00000100258	22	50941377	50946135	-	1	667997	ALU-NREF_2641	22	50273380	50273380	292	298.003	1.00002	0.993684	0.000735899	-0.546788	0.00219978	0.000644455	LMF2	ALU
ENSG00000100427	22	50497821	50524331	-	1	224441	ALU-NREF_2641	22	50273380	50273380	292	493.406	0.999993	0.99391	0.0132007	-0.435957	0.050095	0.0012623	MLC1	ALU
ENSG00000100983	20	33516237	33543620	-	4	400425	ALU-REF_864	20	33115812	33115812	292	303.535	0.999984	4.11564	2.9174e-12	-0.416782	9.999e-05	4.49458e-12	GSS	ALU
ENSG00000101109	20	43595116	43708600	+	1	-289621	SVA-NREF_121	20	43305495	43305495	292	300.769	0.999985	1.01221	0.0021029	-0.219055	0.00329967	0.00182323	STK4	SVA
ENSG00000101464	20	33148347	33264910	-	3	32535	ALU-REF_864	20	33115812	33115812	292	284.9	1	2.92246	3.69545e-08	-0.385194	9.999e-05	1.58028e-07	PIGU	ALU
ENSG00000101638	18	44259082	44339220	-	4	0	ALU-REF_829	18	44338418	44338418	292	299.3	1.00002	3.93875	5.3008e-07	-0.386358	9.999e-05	1.50587e-06	ST8SIA5	ALU
ENSG00000103051	16	70514472	70557468	-	2	0	ALU-REF_797	16	70553010	70553010	292	291.202	0.999983	1.99299	5.40658e-09	0.394141	9.999e-05	1.13077e-08	COG4	ALU
ENSG00000103356	16	23533336	23585710	-	3	4800	ALU-REF_785	16	23528536	23528536	292	292.542	1.00002	3.03659	5.43984e-16	-0.83567	9.999e-05	1.55143e-15	EARS2	ALU
ENSG00000104341	8	98787286	98865241	+	2	-3837	ALU-REF_507	8	98783449	98783449	292	293.069	0.999978	1.99143	3.75022e-07	0.351199	9.999e-05	7.11295e-07	LAPTM4B	ALU
ENSG00000104723	8	15274725	15624158	+	3	0	ALU-NREF_1346	8	15548520	15548520	292	299.942	0.999982	2.96119	1.21174e-05	-0.351384	9.999e-05	2.73115e-05	TUSC3	ALU
ENSG00000104763	8	17913935	17942494	-	6	-642	ALU-NREF_1348	8	17943136	17943136	292	292.356	1.00379	5.96454	3.12306e-05	-0.68815	9.999e-05	0.000178056	ASAH1	ALU
ENSG00000105197	19	39971053	39984422	+	1	273123	ALU-REF_849	19	40257545	40257545	292	301.225	0.999993	1.00176	0.00180073	0.288513	0.00229977	0.0015257	TIMM50	ALU
ENSG00000105202	19	40325099	40337054	-	1	67554	ALU-REF_849	19	40257545	40257545	292	284.757	0.999998	0.983898	0.000106373	0.371244	0.00019998	0.000127565	FBL	ALU
ENSG00000106013	7	117854728	117882785	+	2	11166	ALU-REF_451	7	117893951	117893951	292	287.495	1.00001	1.96957	9.35838e-06	-0.345973	9.999e-05	2.16042e-05	ANKRD7	ALU
ENSG00000106052	7	27778951	28220362	+	2	964807	ALU-NREF_1203	7	29185169	29185169	292	289.362	1.00001	2.01566	0.000433886	0.384868	0.0009999	0.000928394	TAX1BP1	ALU
ENSG00000106066	7	29034848	29553944	-	3	0	ALU-NREF_1203	7	29185169	29185169	292	279.838	0.999983	2.9296	2.96662e-05	0.580198	0.00029997	0.0001275	CPVL	ALU
ENSG00000106366	7	100770371	100782547	+	1	551649	ALU-REF_440	7	101334196	101334196	292	322.554	0.999992	1.01468	0.0028898	0.278769	0.0089991	0.00176494	SERPINE1	ALU
ENSG00000106868	9	114803066	114937688	-	2	0	ALU-REF_567	9	114902346	114902346	292	294.11	1.00002	2.012	4.16845e-11	-0.590941	9.999e-05	7.13669e-11	SUSD1	ALU
ENSG00000107438	10	96997330	97050781	-	2	233343	ALU-NREF_1722	10	96763987	96763987	292	287.438	1.00002	2.01198	0.000474261	0.322325	0.00129987	0.00105681	PDLIM1	ALU
ENSG00000107779	10	88516408	88692595	+	4	0	ALU-REF_598	10	88666177	88666177	292	294.181	1	3.9174	3.1185e-05	0.302133	0.00019998	0.000114092	BMPR1A	ALU
ENSG00000108100	10	35535954	35860852	+	7	0	ALU-REF_584	10	35593207	35593207	292	290.446	1.00314	6.87164	4.34213e-06	0.281786	0.00019998	3.05945e-05	CCNY	ALU
ENSG00000108294	17	36908990	36920484	+	3	-158095	ALU-NREF_2433	17	36750895	36750895	292	307.612	1.00002	3.11643	3.37559e-05	0.596068	0.00089991	6.48109e-05	PSMB3	ALU
ENSG00000108296	17	36956688	36981734	-	2	787345	ALU-NREF_2432	17	36169343	36169343	292	298.801	1.00002	1.98853	0.000520453	-0.357027	0.00129987	0.000889913	CWC25	ALU
ENSG00000108592	17	61896794	61909379	-	2	165101	ALU-NREF_2455	17	61731693	61731693	292	292.998	0.999993	1.99882	9.25156e-11	0.595668	9.999e-05	1.71845e-10	FTSJ3	ALU
ENSG00000109158	4	46920918	47428461	-	2	0	L1-NREF_62	4	47007785	47007785	292	291.886	0.999979	1.99259	3.06036e-05	-0.384138	9.999e-05	6.12108e-05	GABRA4	L1
ENSG00000109323	4	103552661	103682151	-	5	764875	L1-REF_34	4	102787786	102787786	292	304.362	1.00001	4.99217	3.58306e-06	3.73576	0.00329967	1.11274e-05	MANBA	L1
ENSG00000111052	12	81186300	81650533	-	1	0	ALU-NREF_2014	12	81315235	81315235	292	296.149	1	0.997187	0.000407713	0.348041	0.00079992	0.000369658	LIN7A	ALU
ENSG00000111215	12	10977560	11324212	-	4	0	ALU-REF_660	12	11258525	11258525	292	293.084	0.999974	3.85919	4.45675e-35	0.799038	9.999e-05	1.29528e-34	PRR4	ALU
ENSG00000111639	12	6601151	6641121	-	3	-962862	ALU-NREF_1903	12	7603983	7603983	292	305.716	1.00002	3.04837	0.000848726	0.232267	0.00259974	0.00195004	MRPL51	ALU
ENSG00000111676	12	7033627	7051484	+	3	552499	ALU-NREF_1903	12	7603983	7603983	292	295.878	0.999992	2.95662	0.000179502	-0.287419	0.00079992	0.000480529	ATN1	ALU
ENSG00000111834	6	116937643	116954148	+	4	-38957	ALU-NREF_1114	6	116898686	116898686	292	296.89	0.999993	3.49086	5.45978e-07	0.438105	9.999e-05	1.53236e-06	RSPH4A	ALU
ENSG00000112701	6	76311226	76427997	+	2	-972990	ALU-NREF_1055	6	75338236	75338236	292	296.534	1.00002	2.02922	0.000726683	0.172168	0.00149985	0.00133957	SENP6	ALU
ENSG00000113273	5	78073033	78281910	-	7	0	ALU-REF_276	5	78276749	78276749	292	296.577	0.996178	6.12983	4.1871e-08	0.436543	9.999e-05	2.13722e-07	ARSB	ALU
ENSG00000113303	5	180326078	180377906	+	4	0	ALU-NREF_949	5	180349604	180349604	292	284.971	1.00002	3.85994	1.35317e-27	-0.790347	9.999e-05	2.20313e-26	BTNL8	ALU
ENSG00000114405	3	62304649	62321888	+	2	887124	ALU-NREF_496	3	63209012	63209012	292	290.688	0.999988	1.99654	0.000343856	0.258585	0.0009999	0.000707954	C3orf14	ALU
ENSG00000114491	3	124449214	124464040	+	2	104645	ALU-NREF_547	3	124568685	124568685	292	299.656	0.999987	2.0214	0.000881234	-0.195376	0.00219978	0.0015227	UMPS	ALU
ENSG00000115221	2	160956178	161128399	-	2	100326	ALU-REF_80	2	160855852	160855852	292	294.238	0.999992	1.99202	0.000693046	0.32053	0.00189981	0.00131612	ITGB6	ALU
ENSG00000115239	2	53759811	54087297	-	2	-586300	ALU-NREF_272	2	54673597	54673597	292	299.799	0.999981	2.03881	0.00100259	-0.314971	0.00159984	0.00174783	GPR75-ASB3	ALU
ENSG00000115274	2	74682151	74688018	+	3	-170874	ALU-REF_54	2	74511277	74511277	292	297.874	1.00002	3.09987	9.02299e-07	0.380004	9.999e-05	2.17247e-06	INO80B	ALU
ENSG00000115423	2	84743580	85046713	+	4	-153434	ALU-NREF_307	2	84590146	84590146	292	290.916	1.00001	3.1316	0.000221221	0.298964	0.00079992	0.000711518	DNAH6	ALU
ENSG00000115750	2	9983484	10074545	+	2	-24262	ALU-REF_36	2	9959222	9959222	292	293.497	1.00002	2.01546	5.18237e-12	-0.433897	9.999e-05	9.21595e-12	TAF1B	ALU
ENSG00000116199	1	178994940	179045697	+	3	446269	ALU-NREF_145	1	179491966	179491966	292	288.806	1.00002	2.97934	0.000200764	-0.236646	0.00119988	0.000648116	FAM20B	ALU
ENSG00000116752	1	115110179	115124260	-	2	-77141	ALU-NREF_104	1	115201401	115201401	292	300.783	0.999993	1.96802	1.2687e-05	0.346641	9.999e-05	1.84857e-05	BCAS2	ALU
ENSG00000116785	1	196743926	196763203	+	1	16000	ALU-NREF_168	1	196779203	196779203	292	286.81	1	0.989052	4.20539e-16	-0.829846	9.999e-05	7.55856e-16	CFHR3	ALU
ENSG00000116791	1	75171171	75232362	-	5	0	L1-NREF_3	1	75192907	75192907	292	296.163	1.00003	4.9078	2.15612e-75	-1.1261	9.999e-05	9.39139e-76	CRYZ	L1
ENSG00000117399	1	43824627	43828874	+	2	28582	ALU-REF_6	1	43857456	43857456	292	290.731	1	1.92446	2.48941e-08	0.38753	9.999e-05	5.13631e-08	CDC20	ALU
ENSG00000117448	1	46016216	46035721	+	2	330387	ALU-REF_8	1	46366108	46366108	292	294.367	0.999992	1.93513	1.58128e-06	0.253037	9.999e-05	2.77654e-06	AKR1A1	ALU
ENSG00000117481	1	46805850	46830824	+	2	-598563	ALU-REF_7	1	46207287	46207287	292	302.323	0.999997	1.95367	1.14898e-05	-0.337774	9.999e-05	1.57126e-05	NSUN4	ALU
ENSG00000117791	1	220921568	220958150	+	1	0	ALU-NREF_189	1	220954359	220954359	292	297.076	1.00001	0.978631	0.00191652	-0.561514	0.00239976	0.00171198	2019-03-02	ALU
ENSG00000118495	6	144261438	144385735	-	2	78474	ALU-NREF_1162	6	144182964	144182964	292	319.104	0.999994	2.15187	9.49349e-05	0.649908	0.00109989	9.6659e-05	PLAGL1	ALU
ENSG00000118961	2	20883789	21022882	-	2	-358298	ALU-NREF_246	2	21381180	21381180	292	284.5	0.999988	1.95179	0.000674019	-0.266408	0.00159984	0.00154347	C2orf43	ALU
ENSG00000119139	9	71736210	71870124	+	1	0	ALU-REF_547	9	71777927	71777927	292	295.864	1	1.02214	8.44474e-05	-0.247671	9.999e-05	7.74509e-05	TJP2	ALU
ENSG00000119684	14	75480468	75518235	-	2	0	ALU-NREF_2254	14	75499581	75499581	292	285.798	1.00001	2.01964	2.0903e-17	0.540757	9.999e-05	9.18014e-17	MLH3	ALU
ENSG00000119718	14	75469615	75476292	+	2	23289	ALU-NREF_2254	14	75499581	75499581	292	301.268	0.99999	2.03187	4.86056e-12	0.394999	9.999e-05	4.55577e-12	EIF2B2	ALU
ENSG00000119771	2	23608089	23931481	+	1	-417073	L1-NREF_18	2	23191016	23191016	292	289.548	1.00001	1.00808	2.4654e-14	-0.517973	9.999e-05	3.18603e-14	KLHL29	L1
ENSG00000122912	10	70237757	70287231	-	4	0	ALU-REF_593	10	70272097	70272097	292	289.419	0.999991	3.92323	0.000193547	-0.363377	0.00139986	0.000810498	SLC25A16	ALU
ENSG00000123106	12	28286183	28732883	+	6	-11592	ALU-NREF_1938	12	28274591	28274591	292	295.351	0.981003	5.91313	1.30759e-09	0.102001	9.999e-05	8.96875e-09	CCDC91	ALU
ENSG00000123472	1	47098410	47184824	-	2	732302	ALU-REF_8	1	46366108	46366108	292	302.779	1	1.93916	0.000557821	0.273334	0.00139986	0.000853947	ATPAF1	ALU
ENSG00000125869	20	9495006	9511171	+	5	61113	ALU-NREF_2560	20	9572284	9572284	292	293.012	1.00001	5.05029	4.61361e-05	-0.482641	0.00039996	0.00022598	LAMP5	ALU
ENSG00000125877	20	3189515	3204516	+	5	37902	ALU-NREF_2554	20	3242418	3242418	292	292.314	0.999974	5.03308	7.69488e-14	-0.553817	9.999e-05	3.7591e-13	ITPA	ALU
ENSG00000125885	20	5931299	5975852	+	3	0	ALU-REF_853	20	5942988	5942988	292	287.894	1.00001	2.97235	1.90731e-34	0.838236	9.999e-05	1.63797e-33	MCM8	ALU
ENSG00000126775	14	55833111	55878576	-	3	37240	ALU-NREF_2224	14	55795871	55795871	292	294.096	0.999987	2.95561	0.000352231	-0.192137	0.00129987	0.000990973	ATG14	ALU
ENSG00000127903	19	57174021	57183151	-	2	150442	ALU-NREF_2551	19	57023579	57023579	292	295.864	0.999998	1.97045	0.000871418	0.269648	0.00119988	0.00158576	ZNF835	ALU
ENSG00000127914	7	91570182	91739987	+	1	11565	ALU-NREF_1267	7	91751552	91751552	292	291.929	0.999995	0.994882	5.99649e-08	-0.168481	9.999e-05	5.98841e-08	AKAP9	ALU
ENSG00000128039	4	56212277	56239263	+	4	132699	ALU-NREF_640	4	56371962	56371962	292	291.615	0.999991	3.98006	1.8197e-09	0.643251	9.999e-05	7.4234e-09	SRD5A3	ALU
ENSG00000128052	4	55944645	55991756	-	4	-6799	ALU-REF_170	4	55998555	55998555	292	293.725	1.00001	4.00423	4.42355e-06	-0.382656	9.999e-05	1.65948e-05	KDR	ALU
ENSG00000128578	7	129074275	129128240	+	2	-7700	ALU-NREF_1299	7	129066575	129066575	292	293.212	1.00001	1.9877	1.78794e-07	0.420331	9.999e-05	3.35098e-07	STRIP2	ALU
ENSG00000128791	18	9334766	9402418	+	3	0	ALU-REF_823	18	9385392	9385392	292	289.519	1	2.95947	2.8223e-10	0.38797	9.999e-05	9.9332e-10	TWSG1	ALU
ENSG00000128891	15	40820883	40857256	-	2	-243076	ALU-NREF_2296	15	41100332	41100332	292	293.369	0.99998	1.99515	1.51011e-18	0.667085	9.999e-05	2.50952e-18	C15orf57	ALU
ENSG00000130347	6	107018904	107077373	-	1	35281	ALU-REF_379	6	106983623	106983623	292	291.159	1.00001	1.00557	0.000862698	-0.482202	0.00159984	0.000882564	RTN4IP1	ALU
ENSG00000130943	22	46651561	46659219	-	2	28510	ALU-NREF_2638	22	46623051	46623051	292	293.44	0.999982	2.02099	3.82176e-05	-0.57776	0.00019998	7.3915e-05	PKDREJ	ALU
ENSG00000131203	8	39759795	39785963	+	3	0	ALU-REF_482	8	39765315	39765315	292	292.87	1.00002	2.95649	8.78536e-06	0.323035	0.00019998	2.51798e-05	IDO1	ALU
ENSG00000131242	17	29718643	29865236	+	2	0	ALU-NREF_2424	17	29842491	29842491	292	292.499	1	2.0238	0.000233635	-0.231426	0.00059994	0.000466967	RAB11FIP4	ALU
ENSG00000132434	7	55433142	55501435	+	3	-63910	ALU-NREF_1233	7	55369232	55369232	292	294.809	1.00002	3.00345	2.77701e-06	0.36048	9.999e-05	7.4679e-06	LANCL2	ALU
ENSG00000132635	20	2815961	3019722	-	4	0	ALU-REF_851	20	2864002	2864002	292	297.161	0.999996	4.07569	4.1391e-05	-0.205924	0.00029997	0.00014422	PCED1A	ALU
ENSG00000133636	12	86268074	86276770	+	3	-95611	ALU-NREF_2017	12	86172463	86172463	292	296.89	0.999992	2.88925	1.57933e-24	1.09134	9.999e-05	1.88475e-24	NTS	ALU
ENSG00000133710	5	147405247	147516852	+	3	0	ALU-REF_316	5	147462156	147462156	292	301.553	1	3.11285	8.13001e-05	-0.267945	0.00039996	0.000193378	SPINK5	ALU
ENSG00000133818	11	14299473	14386052	-	2	0	ALU-REF_620	11	14348311	14348311	292	287.281	1.00002	1.96618	1.16259e-05	0.337089	9.999e-05	2.69017e-05	RRAS2	ALU
ENSG00000134058	5	68530669	68573250	+	1	-267194	L1-NREF_103	5	68263475	68263475	292	286.14	1.00001	1.00507	0.000405265	0.281956	0.00069993	0.000466002	CDK7	L1
ENSG00000134330	2	9613788	9695921	+	2	192880	ALU-NREF_240	2	9888801	9888801	292	289.22	0.999995	2.0047	2.98183e-05	-0.337343	9.999e-05	6.52432e-05	IAH1	ALU
ENSG00000134905	13	111293760	111373421	-	2	0	ALU-NREF_2187	13	111326782	111326782	292	303.007	1.00001	2.03391	3.06554e-07	-0.598323	9.999e-05	3.73573e-07	CARS2	ALU
ENSG00000135372	11	34127150	34169217	+	5	-18281	ALU-REF_628	11	34108869	34108869	292	291.145	1.00003	4.99582	0.000144498	0.417425	0.00069993	0.000737956	NAT10	ALU
ENSG00000135502	12	58013311	58027138	+	3	56140	ALU-NREF_1981	12	58083278	58083278	292	300.141	1.00001	2.30559	0.000164176	0.404096	0.00029997	0.000306589	SLC26A10	ALU
ENSG00000135625	2	73518059	73520833	-	2	-604657	ALU-NREF_298	2	74125490	74125490	292	350.899	1.00001	1.91076	0.00247388	-0.704286	0.0353965	0.00173022	EGR4	ALU
ENSG00000135870	1	173900353	173991435	-	2	0	ALU-REF_22	1	173944738	173944738	292	298.074	1.00002	1.98536	0.000172221	0.185689	0.00049995	0.000292391	RC3H1	ALU
ENSG00000135912	2	219575569	219620139	+	1	0	ALU-NREF_410	2	219576609	219576609	292	286.154	1.00002	0.983731	9.09998e-05	0.42541	9.999e-05	0.000105316	TTLL4	ALU
ENSG00000135951	2	99613725	100106497	-	1	0	ALU-REF_64	2	99752965	99752965	292	297.404	0.999983	0.995608	7.19729e-09	-0.37205	9.999e-05	5.21009e-09	TSGA10	ALU
ENSG00000135976	2	97779234	97930258	+	1	651899	ALU-NREF_309	2	98582157	98582157	292	295.365	1.00002	0.996147	4.84268e-05	0.178539	9.999e-05	4.36214e-05	ANKRD36	ALU
ENSG00000136487	17	61957579	61959295	-	2	225886	ALU-NREF_2455	17	61731693	61731693	292	293.625	0.999988	2.0148	1.3231e-05	0.491779	9.999e-05	2.5223e-05	GH2	ALU
ENSG00000136783	9	107509970	107522403	+	2	-108996	ALU-REF_562	9	107400974	107400974	292	292.157	1	2.00744	0.000493818	0.324091	0.00089991	0.000987597	NIPSNAP3A	ALU
ENSG00000136861	9	123151148	123342448	-	1	95967	ALU-NREF_1606	9	123055181	123055181	292	298.145	1	1.0173	0.00118305	-0.186936	0.00239976	0.00106752	CDK5RAP2	ALU
ENSG00000136982	8	120846217	120868250	-	3	45425	ALU-NREF_1458	8	120800792	120800792	292	293.583	0.999999	3.05169	2.08366e-05	0.306419	0.00029997	6.03863e-05	DSCC1	ALU
ENSG00000137054	9	37485933	37503694	+	2	92654	ALU-NREF_1531	9	37596348	37596348	292	296.406	1.00001	1.9495	4.00635e-08	-0.430364	9.999e-05	6.17433e-08	POLR1E	ALU
ENSG00000137558	8	75736773	75767264	+	3	-287950	ALU-NREF_1406	8	75448823	75448823	292	292.456	0.999999	2.98289	0.000656856	0.39794	0.00309969	0.00193904	PI15	ALU
ENSG00000137727	11	110447767	110583912	-	3	170829	ALU-NREF_1881	11	110276938	110276938	292	384.975	1.00001	3.08578	0.00192191	0.408449	0.0284972	0.0011328	ARHGAP20	ALU
ENSG00000138185	10	97471537	97698480	+	3	0	ALU-NREF_1724	10	97668538	97668538	292	288.293	1.00001	2.95831	0.000326901	0.216557	0.00179982	0.00105532	ENTPD1	ALU
ENSG00000138346	10	70173822	70231879	-	4	-40218	ALU-REF_593	10	70272097	70272097	292	296.063	1.00002	4.02054	1.7599e-09	0.472411	9.999e-05	5.45854e-09	DNA2	ALU
ENSG00000138744	4	76831810	76912115	-	2	-81709	ALU-NREF_668	4	76993824	76993824	292	295.921	0.999987	1.96034	1.58757e-05	-0.605809	9.999e-05	2.72934e-05	NAAA	ALU
ENSG00000138778	4	104026964	104119566	-	5	-95120	L1-NREF_68	4	104214686	104214686	292	291.444	1	4.95548	2.51885e-05	-0.305333	0.00029997	0.000127051	CENPE	L1
ENSG00000138792	4	111286890	111486441	+	2	0	ALU-REF_201	4	111383207	111383207	292	299.143	0.999997	2.03512	2.29235e-10	0.587893	9.999e-05	2.8182e-10	ENPEP	ALU
ENSG00000139428	12	109991543	110035067	-	1	61372	ALU-NREF_2041	12	109930171	109930171	292	289.562	1	1.00409	5.22223e-05	0.434695	0.00019998	5.63637e-05	MMAB	ALU
ENSG00000139921	14	51706881	51722759	+	4	0	ALU-NREF_2218	14	51719000	51719000	292	294.424	1.00001	3.98764	6.42483e-08	0.317271	9.999e-05	2.2595e-07	TMX1	ALU
ENSG00000140391	15	77336360	77376326	-	3	-385267	ALU-NREF_2337	15	77761593	77761593	292	299.172	1.00001	2.96588	0.000154073	0.404386	0.00079992	0.000378935	TSPAN3	ALU
ENSG00000140557	15	92937059	93011958	+	3	555210	ALU-NREF_2355	15	93567168	93567168	292	293.212	1	2.95466	0.000193749	0.554679	0.00119988	0.000555023	ST8SIA2	ALU
ENSG00000140905	16	81115567	81130008	-	2	898128	ALU-NREF_2396	16	80217439	80217439	292	299.357	0.999983	2.00576	8.64314e-05	-0.273864	0.00029997	0.000141144	GCSH	ALU
ENSG00000141750	17	37366790	37382125	-	1	615895	ALU-NREF_2433	17	36750895	36750895	292	290.888	0.999989	0.99837	0.000265386	-0.655482	0.00049995	0.000272248	STAC2	ALU
ENSG00000143819	1	225997795	226070069	+	2	-1362	ALU-NREF_196	1	225996433	225996433	292	292.984	0.999999	2.01826	0.000995216	0.325042	0.00229977	0.00196836	EPHX1	ALU
ENSG00000144199	2	97749321	97760619	-	1	-821538	ALU-NREF_309	2	98582157	98582157	292	292.413	1.00001	0.996155	0.000148536	0.250858	0.00019998	0.000146352	FAHD2B	ALU
ENSG00000144231	2	128603841	128615731	-	2	-23173	ALU-NREF_329	2	128638904	128638904	292	293.982	1.00001	1.98922	2.16717e-06	0.275786	9.999e-05	3.98142e-06	POLR2D	ALU
ENSG00000144366	2	189156397	189460653	+	3	0	ALU-NREF_383	2	189163017	189163017	292	293.597	0.999991	2.97117	0.00029142	0.33855	0.00089991	0.000833086	GULP1	ALU
ENSG00000144488	2	239008799	239041928	+	3	-794830	ALU-NREF_426	2	238213969	238213969	292	299.913	0.999992	3.05755	0.000137037	0.460931	0.00079992	0.000339827	ESPNL	ALU
ENSG00000144580	2	219433304	219461803	+	1	114806	ALU-NREF_410	2	219576609	219576609	292	289.462	1	1.0039	0.000139528	0.360523	0.00019998	0.000149787	RQCD1	ALU
ENSG00000144791	3	45596887	45727830	+	4	-54225	ALU-NREF_485	3	45542662	45542662	292	302.194	1.00001	4.034	3.25788e-09	0.397822	9.999e-05	7.00752e-09	LIMD1	ALU
ENSG00000145592	5	40825365	40835437	-	3	-764004	L1-REF_43	5	41599441	41599441	292	293.882	0.999998	2.89747	0.000315153	-0.530972	0.00079992	0.000872951	RPL37	L1
ENSG00000146063	5	180649500	180662809	+	3	-299896	ALU-NREF_949	5	180349604	180349604	292	298.017	1	3.03234	0.000224237	-0.248958	0.00109989	0.000585353	TRIM41	ALU
ENSG00000146733	7	56078745	56119297	-	4	227388	ALU-NREF_1234	7	55851357	55851357	292	291.8	0.999974	3.95426	6.56463e-13	0.838009	9.999e-05	2.64487e-12	PSPH	ALU
ENSG00000147316	8	6264114	6501144	+	5	-434832	L1-NREF_171	8	5829282	5829282	292	295.094	1.00002	5.02189	2.23401e-05	-0.216408	0.00019998	0.000101465	MCPH1	L1
ENSG00000148110	9	97136834	97223324	+	4	90932	ALU-NREF_1574	9	97314256	97314256	292	291.045	1.00001	3.58286	0.000490825	-0.225644	0.00219978	0.00179517	HIATL1	ALU
ENSG00000148602	10	85991350	86001217	-	2	8091	ALU-NREF_1708	10	85983259	85983259	292	293.226	1.00001	2.00532	3.55222e-05	0.390417	9.999e-05	6.85808e-05	LRIT1	ALU
ENSG00000148688	10	92631474	92668312	+	5	-416402	ALU-NREF_1717	10	92215072	92215072	292	286.596	1.00002	4.31523	0.000108688	0.266971	0.00079992	0.000543216	RPP30	ALU
ENSG00000148798	10	105036921	105050108	+	3	47416	ALU-REF_604	10	105097524	105097524	292	295.55	1.00001	3.05489	0.000567006	0.260931	0.00219978	0.00160169	INA	ALU
ENSG00000149084	11	43577987	43878167	+	4	0	ALU-NREF_1825	11	43877448	43877448	292	289.063	0.999998	3.91063	3.97624e-20	-0.702049	9.999e-05	2.39126e-19	HSD17B12	ALU
ENSG00000150556	2	149894622	150071776	+	3	555195	ALU-REF_73	2	150626971	150626971	292	300.754	1.00002	2.94804	0.000221686	-0.491601	0.00069993	0.000525382	LYPD6B	ALU
ENSG00000150961	4	119643979	119759838	-	6	-14898	ALU-NREF_707	4	119774736	119774736	292	294.31	0.97729	5.8068	0.00010688	-0.377459	0.00069993	0.000695198	SEC24D	ALU
ENSG00000151065	12	2055221	2802108	-	2	0	ALU-NREF_1898	12	2089856	2089856	292	297.033	1.00001	2.04761	7.88941e-13	0.595696	9.999e-05	1.02866e-12	DCP1B	ALU
ENSG00000151327	14	35514114	35786699	+	3	-81517	ALU-NREF_2201	14	35432597	35432597	292	296.063	0.999997	2.89475	0.000196329	0.429356	0.00079992	0.000512721	FAM177A1	ALU
ENSG00000151917	6	56819774	56892140	+	3	-117052	ALU-NREF_1024	6	56702722	56702722	292	287.309	0.999975	2.97212	0.000243198	-0.3814	0.00089991	0.000811269	BEND6	ALU
ENSG00000152086	2	130949319	130956034	-	2	-12455	SVA-NREF_12	2	130968489	130968489	292	295.294	1.00002	2.03091	3.75094e-11	-0.487843	9.999e-05	5.91562e-11	TUBA3E	SVA
ENSG00000152208	4	93225551	94695707	+	3	0	ALU-NREF_687	4	93363294	93363294	292	290.047	0.999982	2.69778	8.17846e-55	1.18	9.999e-05	5.00968e-54	GRID2	ALU
ENSG00000152348	5	81267845	81574396	+	5	-85365	ALU-REF_284	5	81182480	81182480	292	293.312	0.999982	4.90558	6.02923e-12	0.53681	9.999e-05	2.65445e-11	ATG10	ALU
ENSG00000152642	3	32147182	32210205	+	5	0	ALU-REF_112	3	32203862	32203862	292	290.517	1.00003	4.84863	1.31611e-05	-0.331245	9.999e-05	6.7108e-05	GPD1L	ALU
ENSG00000152683	2	32390934	32449448	+	1	-863460	ALU-NREF_251	2	31527474	31527474	292	302.608	1.00001	0.995716	0.00188857	0.366922	0.00289971	0.00155338	SLC30A6	ALU
ENSG00000153721	6	154708639	154831793	-	4	-8861	ALU-NREF_1171	6	154840654	154840654	292	292.342	0.999991	4.03534	0.000109668	-0.447042	0.00049995	0.000438409	CNKSR3	ALU
ENSG00000154227	15	100940601	101085200	-	5	41622	ALU-NREF_2363	15	100898979	100898979	292	286.796	1.00001	4.19744	0.000198298	0.292856	0.00119988	0.000949009	CERS3	ALU
ENSG00000156253	21	30376706	30391699	-	1	-210118	ALU-REF_881	21	30601817	30601817	292	285.199	0.999992	0.97989	8.39201e-12	0.85234	9.999e-05	1.43383e-11	RWDD2B	ALU
ENSG00000157379	14	24759805	24769039	-	1	-25389	ALU-NREF_2193	14	24794428	24794428	292	289.69	1.00002	0.990331	4.72398e-05	0.600203	0.00019998	5.01265e-05	DHRS1	ALU
ENSG00000158163	3	137780833	137834660	-	3	-10726	SVA-NREF_18	3	137845386	137845386	292	293.839	1.00002	2.97994	0.000254517	-0.264905	0.00329967	0.000724769	DZIP1L	SVA
ENSG00000159479	1	43849589	43855479	-	2	-1977	ALU-REF_6	1	43857456	43857456	292	291.059	0.999978	1.92236	2.41295e-13	0.547602	9.999e-05	5.06907e-13	MED8	ALU
ENSG00000159592	1	46092977	46216322	-	2	0	ALU-REF_7	1	46207287	46207287	292	306.187	0.999982	1.9816	4.95369e-05	-0.257544	0.00019998	6.43655e-05	GPBP1L1	ALU
ENSG00000159713	16	67423713	67427438	-	1	600519	ALU-REF_796	16	66823194	66823194	292	284.771	1.00001	1.0216	0.00110546	0.26959	0.00059994	0.00130263	TPPP3	ALU
ENSG00000162616	1	78444860	78604133	+	7	2934	ALU-NREF_67	1	78607067	78607067	292	285.399	0.993406	6.0218	5.91488e-26	0.761192	9.999e-05	1.82361e-24	DNAJB4	ALU
ENSG00000162869	2	48667738	48742525	+	3	-391204	ALU-NREF_266	2	48276534	48276534	292	292.228	1.00002	2.98958	0.000303401	0.311704	0.0009999	0.000901692	PPP1R21	ALU
ENSG00000162881	2	42989643	42991401	-	1	-32675	ALU-NREF_258	2	43024076	43024076	292	294.039	0.999985	0.996845	5.79789e-08	0.363017	9.999e-05	5.19855e-08	OXER1	ALU
ENSG00000162882	2	42994230	43019733	-	1	-4343	ALU-NREF_258	2	43024076	43024076	292	296.719	0.999985	1.00509	1.65284e-10	0.464449	9.999e-05	1.18491e-10	HAAO	ALU
ENSG00000163466	2	219081818	219119079	+	2	-901046	ALU-NREF_408	2	218180772	218180772	292	293.511	0.999997	1.97798	0.000486553	0.222329	0.00139986	0.000930199	ARPC2	ALU
ENSG00000163638	3	64501334	64673676	-	1	960369	ALU-NREF_497	3	63540965	63540965	292	287.48	0.999987	1.00149	0.00113674	-0.260144	0.00089991	0.00124434	ADAMTS9	ALU
ENSG00000163682	4	39455745	39460568	-	2	424668	ALU-REF_166	4	39031077	39031077	292	301.866	0.999988	2.05312	4.8188e-06	-0.356208	9.999e-05	6.8404e-06	RPL9	ALU
ENSG00000163689	3	58703093	59035810	-	1	-89410	ALU-REF_120	3	59125220	59125220	292	294.695	1.00001	1.02006	0.00170593	-0.232869	0.00129987	0.00165607	C3orf67	ALU
ENSG00000163913	3	129158969	129239198	+	2	-22300	ALU-NREF_549	3	129136669	129136669	292	281.82	0.999985	1.93557	0.000653811	-0.550722	0.00169983	0.00157387	IFT122	ALU
ENSG00000163945	4	1341055	1381837	+	2	-39222	ALU-NREF_616	4	1301833	1301833	292	293.939	1.00002	2.00474	0.000126791	-0.239577	0.00039996	0.000241287	UVSSA	ALU
ENSG00000164066	4	128544427	128647892	+	1	559356	ALU-NREF_721	4	129207248	129207248	292	292.684	0.999985	0.987874	1.64978e-07	0.418773	9.999e-05	1.57681e-07	INTU	ALU
ENSG00000164080	3	51575161	51738339	+	3	971499	ALU-REF_119	3	52709838	52709838	292	287.937	1.00002	2.90797	1.63355e-06	0.260529	0.00019998	5.61044e-06	RAD54L2	ALU
ENSG00000164088	3	52279842	52284613	+	2	425225	ALU-REF_119	3	52709838	52709838	292	291.273	0.999996	1.97179	4.52786e-05	0.237715	0.00019998	9.12561e-05	PPM1M	ALU
ENSG00000164105	4	174291121	174298683	+	4	-246893	ALU-NREF_752	4	174044228	174044228	292	291.116	1.00001	3.85405	0.000176837	0.287243	0.00059994	0.000696935	SAP30	ALU
ENSG00000164142	4	152330369	152584784	+	2	0	L1-REF_40	4	152340708	152340708	292	298.231	0.999992	2.01061	2.07374e-11	0.376352	9.999e-05	2.55484e-11	FAM160A1	L1
ENSG00000164323	4	186080820	186317053	-	7	0	ALU-REF_237	4	186198866	186198866	292	294.609	0.985549	6.78461	5.9639e-05	0.160133	0.00049995	0.000422285	KIAA1430	ALU
ENSG00000164742	7	45613740	45762715	+	2	26498	ALU-NREF_1222	7	45789213	45789213	292	298.459	0.999999	2.01276	5.56124e-05	0.36831	0.00029997	9.25737e-05	ADCY1	ALU
ENSG00000164764	8	73976776	74036323	-	3	-247060	ALU-NREF_1404	8	74283383	74283383	292	303.463	1.00001	3.1167	0.000630768	0.291243	0.00169983	0.00153536	SBSPON	ALU
ENSG00000164808	8	48173168	48648868	+	2	964051	ALU-NREF_1375	8	49612919	49612919	292	294.609	1	2.01203	0.000511679	0.406597	0.00049995	0.000971301	SPIDR	ALU
ENSG00000165325	11	93063138	93171653	+	3	0	ALU-REF_644	11	93102801	93102801	292	298.887	0.999979	3.0199	6.61995e-05	0.40659	0.00029997	0.000163936	CCDC67	ALU
ENSG00000165406	10	45950036	46090354	-	1	0	ALU-NREF_1661	10	46074888	46074888	292	286.839	0.999997	0.984465	0.000497957	0.392452	0.00039996	0.000550077	2019-03-08	ALU
ENSG00000165416	13	53226845	53275044	+	1	158748	ALU-NREF_2107	13	53433792	53433792	292	288.863	0.999992	1.01373	0.0016337	0.236226	0.00229977	0.00175514	SUGT1	ALU
ENSG00000165588	14	57267426	57277197	-	4	829501	ALU-NREF_2226	14	56437925	56437925	292	294.695	1.00001	3.97115	0.000267365	-0.282632	0.00169983	0.000993968	OTX2	ALU
ENSG00000165752	10	134020997	134145351	-	1	-143194	ALU-NREF_1760	10	134288545	134288545	292	290.146	1.00001	0.985903	0.000699242	0.479258	0.00089991	0.000717002	STK32C	ALU
ENSG00000165970	11	20620947	20680831	+	1	-657935	ALU-NREF_1789	11	19963012	19963012	292	303.52	1.00001	1.03081	0.000228114	0.508365	0.00079992	0.000176696	SLC6A5	ALU
ENSG00000165973	11	20691118	21597227	+	2	-728106	ALU-NREF_1789	11	19963012	19963012	292	334.046	1	2.17459	6.0586e-06	0.610496	0.00049995	2.82856e-06	NELL1	ALU
ENSG00000165997	10	18948335	18970568	+	3	426741	ALU-REF_576	10	19397309	19397309	292	291.8	0.999991	2.98635	0.000605698	0.123261	0.00229977	0.00181567	ARL5B	ALU
ENSG00000166002	11	93211639	93276674	-	3	108838	ALU-REF_644	11	93102801	93102801	292	297.176	0.999978	2.98935	0.000664574	0.279716	0.00309969	0.00177792	SMCO4	ALU
ENSG00000166349	11	36532260	36694823	+	3	0	L1-NREF_206	11	36558490	36558490	292	294.566	0.999995	3.0144	7.85779e-05	0.473517	0.00089991	0.000220274	RAG1	L1
ENSG00000166436	11	8633585	8693413	-	5	-193904	ALU-NREF_1777	11	8887317	8887317	292	297.389	0.99999	4.99047	1.81432e-06	-0.589231	9.999e-05	7.27363e-06	TRIM66	ALU
ENSG00000166452	11	8932687	8954553	+	5	-45370	ALU-NREF_1777	11	8887317	8887317	292	296.192	1.00001	4.9982	3.72644e-19	0.988864	9.999e-05	1.03998e-18	AKIP1	ALU
ENSG00000166896	12	58335325	58351052	+	4	8019	ALU-NREF_1982	12	58359071	58359071	292	294.866	1.00001	3.27956	5.65418e-10	0.522678	9.999e-05	1.5276e-09	XRCC6BP1	ALU
ENSG00000166974	18	32556893	32723434	+	3	0	ALU-REF_827	18	32661955	32661955	292	297.233	1.00002	3.04666	0.000167628	0.30941	0.00069993	0.000446046	MAPRE2	ALU
ENSG00000167258	17	37617765	37721160	+	1	-866870	ALU-NREF_2433	17	36750895	36750895	292	296.334	0.999983	1.00954	0.00206366	-0.439263	0.00269973	0.00192937	CDK12	ALU
ENSG00000168032	3	40428648	40470110	+	1	-187026	ALU-NREF_481	3	40241622	40241622	292	288.564	0.999993	1.00452	1.60495e-05	0.354908	9.999e-05	1.80899e-05	ENTPD3	ALU
ENSG00000168288	2	150426149	150444330	-	3	-182641	ALU-REF_73	2	150626971	150626971	292	296.22	0.999992	2.95811	0.000205565	-0.470461	0.00049995	0.000546776	MMADHC	ALU
ENSG00000168827	3	158362068	158410364	+	3	-245166	ALU-REF_140	3	158116902	158116902	292	295.85	0.999991	2.87982	0.000205152	0.224924	0.00089991	0.000536205	GFM1	ALU
ENSG00000168852	13	41396433	41495910	-	1	125321	ALU-REF_711	13	41271112	41271112	292	292.784	1	0.998617	0.00183484	-0.256349	0.00159984	0.00180643	TPTE2P5	ALU
ENSG00000169062	13	115047060	115071283	+	1	-165039	ALU-NREF_2190	13	114882021	114882021	292	290.874	0.999986	0.982491	2.71817e-05	0.185205	9.999e-05	2.76826e-05	UPF3A	ALU
ENSG00000170509	4	88224942	88244058	-	3	-24186	L1-REF_32	4	88268244	88268244	292	292.741	1	3.01497	0.000407222	0.0995492	0.00129987	0.00120653	HSD17B13	L1
ENSG00000170788	10	82095862	82127829	-	1	-914936	ALU-NREF_1706	10	83042765	83042765	292	297.347	0.999989	0.996677	6.16976e-05	-0.223356	9.999e-05	5.26478e-05	DYDC1	ALU
ENSG00000170927	6	51480099	51952423	-	5	0	L1-REF_51	6	51739563	51739563	292	295.707	0.999973	4.88948	2.28355e-14	1.19403	9.999e-05	7.66762e-14	PKHD1	L1
ENSG00000170946	11	31391388	31453396	+	5	934683	ALU-NREF_1808	11	32388079	32388079	292	289.861	1	4.56236	0.000231756	-0.339935	0.0009999	0.0011144	DNAJC24	ALU
ENSG00000170955	11	6340177	6341877	-	4	-17809	ALU-NREF_1766	11	6359686	6359686	292	293.796	1.00001	4.01081	5.89935e-08	0.616263	9.999e-05	2.15472e-07	PRKCDBP	ALU
ENSG00000171222	20	34541540	34547394	-	2	82974	ALU-NREF_2579	20	34458566	34458566	292	291.729	1.00002	2.03325	3.68934e-13	-0.573605	9.999e-05	7.68705e-13	SCAND1	ALU
ENSG00000171246	17	78440949	78451643	-	1	-669116	ALU-NREF_2467	17	79120759	79120759	292	294.723	0.999988	1.00008	0.00202778	-0.347633	0.00229977	0.00193215	NPTX1	ALU
ENSG00000171310	12	104849074	105155792	+	4	282586	ALU-NREF_2034	12	105438378	105438378	292	296.391	1.00002	4.11586	6.72148e-05	-0.428442	0.00039996	0.000243725	CHST11	ALU
ENSG00000171853	2	3383447	3488865	+	3	0	ALU-NREF_230	2	3479251	3479251	292	293.027	1.00002	3.06569	8.34948e-05	0.342341	0.00039996	0.000248624	TRAPPC12	ALU
ENSG00000171928	17	18684309	18710027	+	1	81112	SVA-REF_16	17	18791139	18791139	292	274.72	1.00001	0.984668	9.45093e-06	0.304709	9.999e-05	1.71158e-05	TVP23B	SVA
ENSG00000172239	5	43526370	43557860	-	4	0	ALU-NREF_826	5	43541805	43541805	292	288.264	1.00002	3.86075	8.71319e-05	-0.433275	9.999e-05	0.000373307	PAIP1	ALU
ENSG00000172785	9	121042	188979	-	2	-73484	ALU-NREF_1492	9	262463	262463	292	294.509	1	2.03328	2.52974e-14	0.854506	9.999e-05	3.98943e-14	CBWD1	ALU
ENSG00000173041	7	63980263	64023484	-	1	100067	ALU-NREF_1243	7	63880196	63880196	292	292.941	1.00001	0.988806	0.000299003	0.278172	0.00019998	0.000289047	ZNF680	ALU
ENSG00000173209	2	61404554	61697904	+	2	759196	ALU-REF_52	2	62457100	62457100	292	292.385	0.999983	2.02628	0.000712072	0.316997	0.00179982	0.0014308	AHSA2	ALU
ENSG00000173272	2	132222474	132250316	-	2	378134	ALU-REF_70	2	131844340	131844340	292	292.699	1.00001	1.97987	0.000387024	-0.295441	0.00079992	0.000753793	MZT2A	ALU
ENSG00000173295	8	8086118	8102387	+	2	817740	ALU-NREF_1332	8	8920127	8920127	292	306.629	0.999995	1.97249	1.12569e-09	0.463725	9.999e-05	8.55332e-10	FAM86B3P	ALU
ENSG00000173567	2	26531042	26618759	-	2	57096	ALU-NREF_247	2	26473946	26473946	292	300.255	1.00001	2.0457	0.00101543	0.367016	0.00179982	0.00176035	GPR113	ALU
ENSG00000174080	11	66330935	66336312	-	3	168821	SVA-NREF_81	11	66162114	66162114	292	288.607	0.999997	2.91225	7.04142e-08	-0.438393	9.999e-05	2.44196e-07	CTSF	SVA
ENSG00000174132	5	99871010	99922445	+	4	1089	ALU-REF_297	5	99923534	99923534	292	297.033	1	3.91963	0.00028367	0.265257	0.00139986	0.000984438	FAM174A	ALU
ENSG00000174236	12	27849429	27850566	+	4	14245	ALU-NREF_1936	12	27864811	27864811	292	289.819	1.00001	3.89016	2.25087e-07	-0.416876	9.999e-05	9.71287e-07	REP15	ALU
ENSG00000174405	13	108859788	108870716	-	2	935249	ALU-REF_735	13	107924539	107924539	292	288.706	1.00002	1.94662	0.00102796	-0.216538	0.00229977	0.00213582	LIG4	ALU
ENSG00000174775	11	532243	537287	-	1	104216	ALU-NREF_1761	11	428027	428027	292	298.887	1	1.00741	0.00131843	0.520184	0.00169983	0.001164	HRAS	ALU
ENSG00000175104	11	36508578	36531822	-	2	-26668	L1-NREF_206	11	36558490	36558490	292	285.384	1.00002	1.95972	5.52284e-06	0.536155	9.999e-05	1.38233e-05	TRAF6	L1
ENSG00000175352	11	9002124	9025596	-	5	114807	ALU-NREF_1777	11	8887317	8887317	292	292.77	0.999979	4.85004	1.58314e-05	0.518425	9.999e-05	7.48393e-05	NRIP3	ALU
ENSG00000175581	11	73498362	73576178	+	2	0	ALU-NREF_1843	11	73562793	73562793	292	295.479	0.999999	2.02509	4.69751e-05	0.635559	0.00019998	8.57118e-05	MRPL48	ALU
ENSG00000175800	11	4399513	4400457	+	5	507506	ALU-NREF_1764	11	4907963	4907963	292	292.813	1.00002	4.95021	0.00011118	0.25618	0.00119988	0.000538138	OR52B3P	ALU
ENSG00000176454	15	34651107	34659479	-	3	-82261	ALU-REF_769	15	34741740	34741740	292	291.102	1.00002	3.00118	0.000235516	-0.184607	0.00109989	0.000722424	LPCAT4	ALU
ENSG00000176894	12	133264193	133299228	+	2	-80705	ALU-NREF_2064	12	133183488	133183488	292	289.305	0.999981	1.99006	5.77764e-07	-0.4053	9.999e-05	1.29648e-06	PXMP2	ALU
ENSG00000177873	3	40518605	40531727	+	1	-276983	ALU-NREF_481	3	40241622	40241622	292	296.962	1.00002	1.02065	1.66339e-06	0.366969	9.999e-05	1.38528e-06	ZNF619	ALU
ENSG00000178460	8	67782985	67834283	+	1	893038	ALU-REF_495	8	68727321	68727321	292	300.127	1.00002	1.01605	0.000252304	-0.233702	0.00049995	0.000210078	MCMDC2	ALU
ENSG00000179051	1	17733257	17766220	-	1	48492	ALU-REF_4	1	17684765	17684765	292	293.112	1.00002	1.00062	0.000582471	-0.208143	0.00079992	0.0005688	RCC2	ALU
ENSG00000179097	3	88039847	88042919	+	4	-388914	ALU-NREF_508	3	87650933	87650933	292	290.375	1	3.92906	4.74667e-06	0.53146	0.00019998	1.98214e-05	HTR1F	ALU
ENSG00000179979	4	1385341	1389780	+	2	-83508	ALU-NREF_616	4	1301833	1301833	292	296.206	0.999988	2.04347	0.000173982	-0.276956	0.00079992	0.000319116	CRIPAK	ALU
ENSG00000182511	15	91426926	91439006	+	2	-24829	ALU-REF_781	15	91402097	91402097	292	291.202	0.999988	1.96729	6.53493e-09	0.444968	9.999e-05	1.34833e-08	FES	ALU
ENSG00000183087	13	114523523	114567046	-	1	-314975	ALU-NREF_2190	13	114882021	114882021	292	287.922	0.999988	0.981976	0.000677578	0.226897	0.00089991	0.000725866	GAS6	ALU
ENSG00000183137	6	109416314	109485135	+	1	617847	ALU-NREF_1098	6	110102982	110102982	292	293.668	1.00001	1.00292	0.000253736	0.26513	0.00049995	0.000244283	CEP57L1	ALU
ENSG00000183324	15	73735500	73926475	+	1	56844	ALU-NREF_2334	15	73983319	73983319	292	289.747	1	0.995246	6.78077e-05	0.300774	9.999e-05	7.20047e-05	C15orf60	ALU
ENSG00000183722	13	39917030	40177665	-	2	0	ALU-REF_710	13	40028470	40028470	292	288.179	0.999983	2.00193	2.28425e-13	0.489536	9.999e-05	6.54848e-13	LHFP	ALU
ENSG00000183807	6	117073364	117086886	-	4	174678	ALU-NREF_1114	6	116898686	116898686	292	293.526	0.999982	3.5612	0.000616422	-0.321049	0.00239976	0.00212263	FAM162B	ALU
ENSG00000185052	20	19193291	19703581	+	3	-23229	ALU-REF_860	20	19170062	19170062	292	289.106	0.999983	2.99056	5.08092e-17	-0.857803	9.999e-05	2.16598e-16	SLC24A3	ALU
ENSG00000185272	21	15588452	15600693	+	3	52174	ALU-NREF_2589	21	15652867	15652867	292	290.517	0.999996	2.95159	3.51558e-09	0.498424	9.999e-05	1.13673e-08	RBM11	ALU
ENSG00000185442	15	93160674	93353114	-	3	-19647	ALU-NREF_2354	15	93372761	93372761	292	284.957	0.999985	2.899	3.19395e-05	-0.393427	0.00019998	0.000115399	FAM174B	ALU
ENSG00000185610	12	45408456	45444882	-	6	0	ALU-NREF_1971	12	45419555	45419555	292	289.448	1	5.02098	6.60842e-13	0.56976	9.999e-05	4.17718e-12	DBX2	ALU
ENSG00000186205	1	220960102	220987735	+	2	-5743	ALU-NREF_189	1	220954359	220954359	292	295.964	1.00002	2.01645	2.56287e-07	-0.782337	9.999e-05	4.28601e-07	2019-03-01	ALU
ENSG00000186322	15	82804004	82810874	+	3	963000	ALU-REF_779	15	83773874	83773874	292	292.471	1.00001	2.9351	1.39699e-09	-0.465637	9.999e-05	3.97702e-09	GOLGA6L17P	ALU
ENSG00000186470	6	26365388	26378546	+	2	583628	ALU-NREF_980	6	26962174	26962174	292	292.884	1.00002	2.01466	1.62697e-05	-0.409683	9.999e-05	3.18157e-05	BTN3A2	ALU
ENSG00000186472	7	82383330	82792246	-	7	-59510	ALU-NREF_1261	7	82851756	82851756	292	288.564	0.99188	6.28031	4.47578e-05	-0.313825	0.00019998	0.000333767	PCLO	ALU
ENSG00000187812	15	76067895	76079239	+	1	746780	ALU-NREF_2335	15	76826019	76826019	292	312.232	0.999991	1.02151	0.000557375	0.469008	0.00229977	0.000365633	RP11-24M17.5	ALU
ENSG00000187987	6	28399708	28411279	-	3	209512	ALU-REF_349	6	28190196	28190196	292	292.2	1.00001	2.90795	8.71553e-05	-0.267748	9.999e-05	0.000251994	ZSCAN23	ALU
ENSG00000188234	10	46321043	46349323	-	1	246155	ALU-NREF_1661	10	46074888	46074888	292	292.97	1	1.01442	2.11802e-05	0.597124	9.999e-05	2.08172e-05	AGAP4	ALU
ENSG00000188730	7	49813258	50199426	+	4	-261192	ALU-REF_420	7	49552066	49552066	292	293.668	1.00002	4.07085	3.33917e-09	-0.468905	9.999e-05	1.22609e-08	VWC2	ALU
ENSG00000188732	7	23719750	23742868	+	3	-54065	ALU-NREF_1201	7	23665685	23665685	292	290.674	1.00001	2.96734	3.42097e-16	0.831171	9.999e-05	1.1832e-15	FAM221A	ALU
ENSG00000188820	6	116782534	116784934	+	4	-31720	ALU-REF_383	6	116750814	116750814	292	304.461	1	3.62311	0.000117526	-0.302257	0.00039996	0.000304306	FAM26F	ALU
ENSG00000189091	16	70557692	70608820	+	2	-4682	ALU-REF_797	16	70553010	70553010	292	288.835	1.00001	1.91302	0.000345745	-0.278985	0.00059994	0.000712272	SF3B3	ALU
ENSG00000196263	19	57019213	57041590	+	2	0	ALU-NREF_2551	19	57023579	57023579	292	299.457	0.999994	2.02366	0.000154946	0.216567	0.00049995	0.000258172	ZNF471	ALU
ENSG00000196419	22	42017124	42060044	+	1	80435	ALU-REF_890	22	42140479	42140479	292	281.235	1.00001	0.981954	0.0011651	-0.208572	0.00139986	0.00141266	XRCC6	ALU
ENSG00000196460	2	102013824	102091165	-	2	-6674	ALU-REF_66	2	102097839	102097839	292	284.942	1.00002	1.99503	1.72885e-07	-0.466963	9.999e-05	4.85469e-07	RFX8	ALU
ENSG00000196604	2	130831109	130886795	-	2	-81694	SVA-NREF_12	2	130968489	130968489	292	298.316	1	2.01242	9.40284e-06	-0.330365	9.999e-05	1.51474e-05	POTEF	SVA
ENSG00000196865	10	115614421	115676953	+	3	-566156	ALU-NREF_1744	10	115048265	115048265	292	287.637	1.00002	2.98675	0.00025668	0.237206	0.00089991	0.000852589	NHLRC2	ALU
ENSG00000196911	6	117002351	117063029	+	4	-103665	ALU-NREF_1114	6	116898686	116898686	292	292.556	0.999976	3.46108	6.80486e-05	-0.266019	0.00029997	0.000231815	KPNA5	ALU
ENSG00000196950	2	196440702	196602426	+	5	133986	ALU-REF_91	2	196736412	196736412	292	290.745	1.00001	4.82614	2.62456e-10	0.456866	9.999e-05	1.38291e-09	SLC39A10	ALU
ENSG00000197563	18	59710801	59854351	-	5	0	ALU-NREF_2521	18	59713734	59713734	292	291.786	0.999991	5.03914	9.52634e-10	-0.433052	9.999e-05	4.86932e-09	PIGN	ALU
ENSG00000198270	12	112369087	112450970	-	1	-326161	ALU-NREF_2042	12	112777131	112777131	292	304.319	1.00002	1.01345	8.96066e-05	0.516215	0.00029997	6.44429e-05	TMEM116	ALU
ENSG00000198276	20	62571187	62587769	-	1	66773	ALU-NREF_2584	20	62504414	62504414	292	287.252	0.999991	0.991794	0.000517753	0.453235	0.00059994	0.000570589	UCKL1	ALU
ENSG00000198440	19	56909336	56947404	+	2	18657	ALU-NREF_2548	19	56966061	56966061	292	288.878	0.999992	1.97092	9.61635e-09	0.409878	9.999e-05	2.27258e-08	ZNF583	ALU
ENSG00000198467	9	35681990	35691017	-	1	-112080	ALU-REF_546	9	35803097	35803097	292	300.141	0.999991	0.999378	6.9631e-05	-0.226611	0.00019998	5.51094e-05	TPM2	ALU
ENSG00000198535	15	62359177	62363116	+	4	-40897	ALU-NREF_2318	15	62318280	62318280	292	298.544	1.00002	4.05089	2.40508e-08	0.372029	9.999e-05	6.79466e-08	C2CD4A	ALU
ENSG00000198604	14	35221938	35344853	-	2	-87744	ALU-NREF_2201	14	35432597	35432597	292	300.327	1.00002	1.99976	0.000152105	0.260495	0.00059994	0.000244667	BAZ1A	ALU
ENSG00000198774	12	86198332	86230348	-	3	-93114	ALU-NREF_2019	12	86323462	86323462	292	288.949	1.00001	2.84124	2.80302e-05	0.599112	9.999e-05	8.77097e-05	RASSF9	ALU
ENSG00000198879	10	7200587	7453450	-	3	329232	ALU-NREF_1624	10	6871355	6871355	292	288.122	1.00001	2.98434	0.000195381	0.475887	0.00069993	0.000643113	SFMBT2	ALU
ENSG00000198909	17	61699776	61778532	+	2	0	ALU-NREF_2455	17	61731693	61731693	292	284.942	0.999983	1.96964	3.12468e-06	-0.469542	9.999e-05	8.09992e-06	MAP3K3	ALU
ENSG00000203805	10	122216467	122349367	+	2	879617	ALU-NREF_1749	10	123228984	123228984	292	324.337	0.999999	2.01417	4.31643e-05	0.249029	0.00219978	3.2773e-05	PPAPDC1A	ALU
ENSG00000204982	9	33613847	33614007	-	1	-86127	ALU-NREF_1528	9	33700134	33700134	292	302.294	0.999998	1.01852	0.000561767	0.388528	0.00039996	0.000456735	PRSS3P4	ALU
ENSG00000205464	5	81575282	81682796	+	5	-392802	ALU-REF_284	5	81182480	81182480	292	292.813	0.999997	4.89694	1.02134e-07	0.338418	9.999e-05	4.8017e-07	ATP6AP1L	ALU
ENSG00000205846	12	8608523	8630926	+	3	0	ALU-REF_658	12	8625579	8625579	292	294.951	0.999978	3.02524	8.47098e-05	-0.419565	0.00039996	0.000235942	CLEC6A	ALU
ENSG00000213281	1	115247091	115259515	-	2	45690	ALU-NREF_104	1	115201401	115201401	292	295.65	0.999996	1.96772	5.74125e-06	0.311648	0.00019998	9.87562e-06	NRAS	ALU
ENSG00000213642	7	64029807	64030815	-	1	149611	ALU-NREF_1243	7	63880196	63880196	292	296.976	1.00001	1.01487	0.00117839	0.309628	0.00119988	0.00108509	RP11-561N12.5	ALU
ENSG00000214078	20	34213954	34288906	-	2	-169660	ALU-NREF_2579	20	34458566	34458566	292	294.153	0.999999	2.03133	6.43281e-30	-1.37286	9.999e-05	8.0836e-30	CPNE1	ALU
ENSG00000214880	11	55746180	55753881	-	5	-17451	ALU-NREF_1831	11	55771332	55771332	292	296.62	0.999983	2.97809	0.000440524	-0.516154	0.00219978	0.00118106	OR7E5P	ALU
ENSG00000216901	6	28143967	28144452	+	2	45744	ALU-REF_349	6	28190196	28190196	292	297.104	1.00001	1.94394	2.35793e-20	-0.722345	9.999e-05	2.14969e-20	AL022393.7	ALU
ENSG00000216937	10	32735069	33171802	+	2	-60991	ALU-NREF_1647	10	32674078	32674078	292	289.876	1.00002	1.99152	3.41743e-05	0.491687	9.999e-05	7.26811e-05	CCDC7	ALU
ENSG00000219932	10	69634091	69634672	+	3	-830395	L1-NREF_199	10	68803696	68803696	292	301.995	1.00002	3.06728	0.000220659	0.505137	0.00149985	0.00052749	RPL12P8	L1
ENSG00000221947	8	71581601	71702606	+	4	72201	ALU-NREF_1399	8	71774807	71774807	292	289.933	0.999999	3.89471	3.19674e-05	-0.458675	0.00019998	0.000132803	XKR9	ALU
ENSG00000223760	2	130887195	130902707	+	2	65782	SVA-NREF_12	2	130968489	130968489	292	293.44	1	1.97823	0.000207655	-0.272908	0.00049995	0.000396151	MED15P9	SVA
ENSG00000224172	7	64196312	64197121	-	1	316116	ALU-NREF_1243	7	63880196	63880196	292	296.42	0.999996	1.00611	0.000531081	0.338529	0.00049995	0.000484648	RP11-416N13.1	ALU
ENSG00000224669	7	64043112	64043585	+	1	-162916	ALU-NREF_1243	7	63880196	63880196	292	298.288	0.999999	1.00574	1.44827e-09	0.537876	9.999e-05	9.71611e-10	RP11-561N12.1	ALU
ENSG00000225492	1	89873239	89891802	+	1	478767	ALU-NREF_80	1	90370569	90370569	292	295.736	0.999996	1.00837	0.000232924	0.119878	0.00029997	0.00021414	GBP1P1	ALU
ENSG00000226468	7	32496576	32497370	-	5	-333871	ALU-NREF_1204	7	32831241	32831241	292	285.156	1.00001	4.52555	2.76222e-05	0.453432	0.00469953	0.000155289	AC018641.7	ALU
ENSG00000227525	12	19241975	19242825	+	4	-345788	ALU-NREF_1926	12	18896187	18896187	292	297.404	1	3.95982	0.000492277	0.491758	0.00189981	0.00172665	RPL7P6	ALU
ENSG00000227692	2	187229326	187229855	+	2	-20331	ALU-NREF_382	2	187208995	187208995	292	291.914	0.99998	1.99353	0.000381405	-0.399059	0.00069993	0.000761819	MED28P3	ALU
ENSG00000227986	7	63815457	63816577	+	1	63619	ALU-NREF_1243	7	63880196	63880196	292	289.576	1	1.01533	3.56572e-06	0.370003	9.999e-05	3.9739e-06	TRIM60P18	ALU
ENSG00000228653	7	63961204	63962107	+	1	-81008	ALU-NREF_1243	7	63880196	63880196	292	294.638	0.999992	1.00057	5.60403e-06	0.395245	9.999e-05	5.08716e-06	HNRNPCP7	ALU
ENSG00000228716	5	79922048	80172279	-	3	0	ALU-REF_279	5	80039372	80039372	292	291.059	1.00002	2.98664	2.26743e-15	-0.552174	9.999e-05	7.50207e-15	DHFR	ALU
ENSG00000228869	13	46245981	46246526	+	3	473226	ALU-REF_713	13	46719752	46719752	292	293.725	1.00001	3.00294	0.000688777	0.31111	0.00259974	0.00199241	COX4I1P2	ALU
ENSG00000229186	12	112337068	112340042	+	1	437089	ALU-NREF_2042	12	112777131	112777131	292	288.92	0.999996	0.97725	7.90161e-11	-0.807837	9.999e-05	9.70438e-11	ADAM1A	ALU
ENSG00000230445	10	27535280	27577753	-	3	494920	ALU-NREF_1641	10	27040360	27040360	292	290.603	1.00001	3.01221	0.000128371	0.505354	0.00039996	0.000401285	LRRC37A6P	ALU
ENSG00000230715	7	128292896	128293719	+	4	-83733	ALU-NREF_1298	7	128209163	128209163	292	290.175	1.00001	3.61268	0.000365061	-0.374293	0.00159984	0.0013754	RP11-274B21.4	ALU
ENSG00000230873	6	17102490	17131603	+	4	-151534	L1-NREF_127	6	16950956	16950956	292	295.194	1	3.88263	8.16647e-05	-0.160599	0.00069993	0.000289771	STMND1	L1
ENSG00000231165	9	33695766	33696057	+	1	4077	ALU-NREF_1528	9	33700134	33700134	292	284.401	0.999981	0.976699	8.06641e-11	0.695871	9.999e-05	1.38434e-10	TRBV26OR9-2	ALU
ENSG00000231259	2	87257801	87303536	-	1	-104166	L1-NREF_23	2	87407702	87407702	292	289.704	1.00001	0.992671	1.96962e-07	-0.419304	9.999e-05	2.1828e-07	AC125232.1	L1
ENSG00000231360	1	144339739	144521058	+	3	429968	ALU-NREF_111	1	144951026	144951026	292	300.013	0.999982	3.02143	1.3526e-21	1.10199	9.999e-05	1.15378e-21	AL592284.1	ALU
ENSG00000234020	1	111895898	111910031	-	4	0	SVA-NREF_6	1	111896187	111896187	292	303.805	0.999975	3.94683	1.16401e-09	-0.470559	9.999e-05	2.13098e-09	CHIAP3	SVA
ENSG00000234231	2	88000504	88038766	+	4	-592802	L1-NREF_23	2	87407702	87407702	292	294.481	0.999975	4.04049	2.7614e-05	0.387784	9.999e-05	0.000103157	AC093616.4	L1
ENSG00000234444	7	63767838	63815238	+	1	64958	ALU-NREF_1243	7	63880196	63880196	292	278.94	0.999981	0.991669	5.72488e-06	0.407069	9.999e-05	9.19546e-06	ZNF736	ALU
ENSG00000235574	7	27531302	27532384	-	1	16966	ALU-REF_411	7	27514336	27514336	292	284.429	1.00001	1.02104	0.0004767	0.265685	0.00059994	0.000576883	AC073150.6	ALU
ENSG00000236624	1	45959539	45988719	-	2	-377389	ALU-REF_8	1	46366108	46366108	292	301.096	1.00001	1.92887	2.78038e-27	0.887192	9.999e-05	8.50013e-28	CCDC163P	ALU
ENSG00000240771	12	58003964	58013162	+	3	70116	ALU-NREF_1981	12	58083278	58083278	292	306.586	1.00002	2.2872	2.14193e-05	0.443338	9.999e-05	3.0488e-05	ARHGEF25	ALU
ENSG00000241549	6	26839264	26924333	-	2	-37841	ALU-NREF_980	6	26962174	26962174	292	297.233	1.00002	1.98466	0.00107221	-0.278387	0.00259974	0.00191717	GUSBP2	ALU
ENSG00000243566	7	76139746	76673093	+	3	0	ALU-NREF_1248	7	76456343	76456343	292	300.683	1.00001	2.9486	0.000132944	-0.413703	0.00069993	0.000311202	UPK3B	ALU
ENSG00000244004	4	9564792	9565570	+	1	139276	SVA-NREF_36	4	9704846	9704846	292	283.602	1	0.964122	0.000180595	0.105434	0.00029997	0.000215882	RP11-1396O13.2	SVA
ENSG00000244119	3	101431317	101432035	+	1	351	ALU-NREF_514	3	101432386	101432386	292	285.256	1.00001	1.0508	0.00101524	-0.345319	0.00049995	0.00122094	PDCL3P4	ALU
ENSG00000244723	22	23991401	23995521	-	1	118719	ALU-NREF_2629	22	23872682	23872682	292	309.566	1.00001	1.03116	0.000342635	-0.156562	0.00019998	0.000233926	ASLP1	ALU
ENSG00000245958	4	120375947	120550146	+	5	2145-09-29	ALU-NREF_709	4	120639904	120639904	292	294.139	0.999979	4.92131	1.37979e-05	0.31484	0.00019998	6.31558e-05	RP11-33B1.1	ALU
ENSG00000248511	4	93218403	93225329	-	2	-137965	ALU-NREF_687	4	93363294	93363294	292	312.916	1	1.81868	9.81538e-10	-0.528974	9.999e-05	4.52045e-10	RP11-9B6.1	ALU
ENSG00000248746	11	66313867	66330800	+	3	-151753	SVA-NREF_81	11	66162114	66162114	292	293.611	1.00002	2.97914	9.04562e-07	-0.377535	9.999e-05	2.51392e-06	ACTN3	SVA
ENSG00000250342	4	9053569	9053777	-	1	-651069	SVA-NREF_36	4	9704846	9704846	292	286.896	1	1.00485	0.000296617	-0.253866	0.00039996	0.00033687	RP11-747H12.6	SVA
ENSG00000251689	4	263656	263964	-	3	7884	ALU-NREF_614	4	255772	255772	292	301.809	1	2.70607	1.08174e-13	0.673479	9.999e-05	1.13781e-13	RP11-478C6.5	ALU
ENSG00000253426	8	9009253	9025646	+	4	0	ALU-NREF_1333	8	9012966	9012966	292	304.148	1.00001	3.64032	8.355e-05	0.355803	0.00069993	0.000216265	RP11-10A14.4	ALU
ENSG00000253771	13	25498816	25542625	-	7	0	ALU-NREF_2078	13	25512014	25512014	292	288.393	1.01	6.95124	0.000176985	0.540734	0.00119988	0.00125808	TPTE2P1	ALU
ENSG00000255185	16	70044655	70099848	-	2	-453162	ALU-REF_797	16	70553010	70553010	292	287.366	1.00002	1.99722	4.28852e-06	-0.309981	9.999e-05	1.02045e-05	PDXDC2P	ALU
ENSG00000255468	11	66115422	66139685	+	3	22429	SVA-NREF_81	11	66162114	66162114	292	289.248	0.999997	2.97076	4.8796e-05	0.18165	0.00039996	0.000157368	RP11-867G23.8	SVA
ENSG00000256594	12	9787189	9811008	+	3	60154	ALU-NREF_1906	12	9871162	9871162	292	292.841	1	2.98297	1.23073e-06	0.526207	9.999e-05	3.5437e-06	RP11-705C15.2	ALU
ENSG00000257327	12	104235230	104359486	+	1	0	ALU-REF_684	12	104293396	104293396	292	293.112	0.999988	0.998976	4.47705e-08	0.580753	9.999e-05	4.21754e-08	RP11-650K20.3	ALU
ENSG00000258053	12	71441183	71512027	-	2	-13452	ALU-NREF_2002	12	71525479	71525479	292	290.588	0.999986	2.01433	3.37095e-21	0.724429	9.999e-05	8.45464e-21	CTD-2021H9.3	ALU
ENSG00000260230	9	111892574	111929571	-	6	-500630	ALU-REF_566	9	112430201	112430201	292	291.672	0.9974	5.91519	0.00019576	0.231881	0.00139986	0.00118877	FRRS1L	ALU
ENSG00000261011	10	88761394	88769662	+	4	-95217	ALU-REF_598	10	88666177	88666177	292	286.839	1.00002	3.8268	5.1697e-06	0.328602	0.00019998	2.39692e-05	RP11-96C23.11	ALU
ENSG00000261599	16	33105526	33140411	-	2	-327298	ALU-NREF_2382	16	33467709	33467709	292	292.97	0.999991	1.98907	3.44738e-05	-0.251832	0.00019998	6.65464e-05	HERC2P8	ALU
ENSG00000263369	17	30433350	30441144	-	3	590859	ALU-NREF_2424	17	29842491	29842491	292	289.391	0.99998	2.94575	0.000320018	0.255923	0.00109989	0.00100273	RP11-640N20.9	ALU
ENSG00000270802	19	15449760	15450048	+	1	477904	ALU-NREF_2538	19	15927952	15927952	292	286.625	0.999984	0.998095	0.000701422	-0.120621	0.0009999	0.00078473	AC005776.1	ALU
ENSG00000270863	12	11665658	11667070	+	4	-486620	ALU-NREF_1910	12	11179038	11179038	292	294.723	1	3.86115	2.74241e-11	0.333867	9.999e-05	8.56921e-11	RP11-434C1.3	ALU
ENSG00000271275	22	18984652	18985108	-	3	937291	ALU-REF_887	22	18047361	18047361	292	290.56	1	2.98237	0.000513064	0.281675	0.00239976	0.00157902	AC007326.9	ALU
ENSG00000271529	7	128296017	128298845	-	4	86854	ALU-NREF_1298	7	128209163	128209163	292	298.901	1.00001	3.70514	4.19609e-05	-0.569664	0.00029997	0.000126098	CICP14	ALU

## Sheet: iPSC.specific.TE-eQTL.0.05FDR+B
eQTL	gene	Chr_gene	Start_gene	End_gene	strand	nb_tested	dist_Gene	MEI	Chr_MEI	Pos_MEI	Pos_MEI2	df	dummy	Beta1	Beta2	P_nominal	slope	P_empirical	P_value	Gene_name	mei	mean_XP
ENSG00000002016_ALU-NREF_1896	ENSG00000002016	12	1021244	1099219	-	3	33284	ALU-NREF_1896	12	987960	987960	292	294.98	0.999983	3.00963	0.000159929	-0.358244	0.00059994	0.000445478	RAD52	ALU	12.7582
ENSG00000011523_ALU-NREF_283	ENSG00000011523	2	65283501	65357240	+	4	0	ALU-NREF_283	2	65333803	65333803	292	294.481	0.999975	3.93539	1.61954e-11	-1.41161	9.999e-05	5.23604e-11	CEP68	ALU	12.9521
ENSG00000012779_ALU-NREF_1661	ENSG00000012779	10	45869662	45941561	+	1	133327	ALU-NREF_1661	10	46074888	46074888	292	293.069	1.00001	0.987121	0.00102028	0.523264	0.00139986	0.000985744	ALOX5	ALU	1.18943
ENSG00000019505_ALU-NREF_1826	ENSG00000019505	11	45261853	45307870	-	2	-7386	ALU-NREF_1826	11	45315256	45315256	292	285.327	0.999997	1.94293	0.00016608	0.553523	0.00049995	0.000383455	SYT13	ALU	9.46655
ENSG00000036549_ALU-NREF_67	ENSG00000036549	1	78028102	78149104	-	5	-457963	ALU-NREF_67	1	78607067	78607067	292	291.615	1	4.25183	0.000166207	-0.170427	0.0009999	0.000713548	ZZZ3	ALU	41.9265
ENSG00000047188_ALU-REF_302	ENSG00000047188	5	112849381	112930982	+	2	0	ALU-REF_302	5	112881417	112881417	292	294.481	0.999991	1.99065	1.12899e-14	-0.598535	9.999e-05	1.73694e-14	YTHDC2	ALU	17.3919
ENSG00000051180_ALU-NREF_2296	ENSG00000051180	15	40986973	41024354	+	3	75978	ALU-NREF_2296	15	41100332	41100332	292	300.027	1.00001	3.04217	0.000215597	-0.246087	0.0009999	0.000536538	RAD51	ALU	40.0783
ENSG00000053108_L1-REF_46	ENSG00000053108	5	132532148	132948255	-	3	0	L1-REF_46	5	132918965	132918965	292	297.86	1.00001	3.06474	5.29274e-08	0.597575	9.999e-05	1.19307e-07	FSTL4	L1	5.43965
ENSG00000057657_ALU-REF_379	ENSG00000057657	6	106534196	106557814	+	2	425809	ALU-REF_379	6	106983623	106983623	292	300.284	0.999995	2.01524	0.000171632	0.555086	0.00159984	0.00027948	PRDM1	ALU	0.711395
ENSG00000059691_L1-NREF_80	ENSG00000059691	4	152591657	152682175	-	2	-50648	L1-NREF_80	4	152732823	152732823	292	302.323	0.999993	1.98892	2.28481e-05	-0.545775	9.999e-05	3.25598e-05	PET112	L1	16.8517
ENSG00000065613_ALU-REF_604	ENSG00000065613	10	105726960	105788991	+	5	-629436	ALU-REF_604	10	105097524	105097524	292	291.344	1.00002	4.96252	7.10063e-05	0.167297	0.00049995	0.000358933	SLK	ALU	18.9887
ENSG00000066405_SVA-NREF_18	ENSG00000066405	3	137717578	137752494	+	3	92892	SVA-NREF_18	3	137845386	137845386	292	294.338	1.00002	2.82869	5.66684e-06	-0.307094	0.00319968	1.47013e-05	CLDN18	SVA	0.214492
ENSG00000070159_ALU-NREF_1593	ENSG00000070159	9	112137747	112260590	-	6	-803	ALU-NREF_1593	9	112261393	112261393	292	295.308	0.98483	5.86219	7.47426e-05	0.380042	0.00049995	0.000451312	PTPN3	ALU	4.41127
ENSG00000075234_ALU-NREF_2638	ENSG00000075234	22	46663859	46689905	+	2	-40808	ALU-NREF_2638	22	46623051	46623051	292	302.921	0.999987	2.01928	2.00279e-05	0.663472	9.999e-05	2.82901e-05	TTC38	ALU	15.8197
ENSG00000088035_SVA-NREF_4	ENSG00000088035	1	63833262	63904233	+	2	945946	SVA-NREF_4	1	64850179	64850179	292	289.833	0.999989	2.02911	0.000254105	0.241825	0.00049995	0.000543671	ALG6	SVA	39.5608
ENSG00000088451_ALU-NREF_2173	ENSG00000088451	13	95226309	95248511	-	1	-1003	ALU-NREF_2173	13	95249514	95249514	292	297.004	0.999993	1.0052	2.1795e-08	-0.667169	9.999e-05	1.66104e-08	TGDS	ALU	22.7078
ENSG00000091127_ALU-NREF_1273	ENSG00000091127	7	105080109	105162714	-	5	184520	ALU-NREF_1273	7	104895589	104895589	292	288.051	1.00002	4.90925	0.000167402	0.347524	0.00069993	0.000909635	PUS7	ALU	46.7324
ENSG00000095777_ALU-NREF_1640	ENSG00000095777	10	26223197	26501456	+	7	0	ALU-NREF_1640	10	26225949	26225949	292	291.03	0.997351	6.73811	1.87883e-05	-0.505951	0.00019998	0.000133959	MYO3A	ALU	3.73865
ENSG00000100191_ALU-NREF_2632	ENSG00000100191	22	32614466	32651328	-	2	-168614	ALU-NREF_2632	22	32819942	32819942	292	334.588	1.00001	1.52694	0.00155296	-0.278115	0.00289971	0.00107516	SLC5A4	ALU	0.219212
ENSG00000100258_ALU-NREF_2641	ENSG00000100258	22	50941377	50946135	-	1	667997	ALU-NREF_2641	22	50273380	50273380	292	298.003	1.00002	0.993684	0.000735899	-0.546788	0.00219978	0.000644455	LMF2	ALU	15.4761
ENSG00000100983_ALU-REF_864	ENSG00000100983	20	33516237	33543620	-	4	400425	ALU-REF_864	20	33115812	33115812	292	303.535	0.999984	4.11564	2.9174e-12	-0.416782	9.999e-05	4.49458e-12	GSS	ALU	26.1631
ENSG00000101464_ALU-REF_864	ENSG00000101464	20	33148347	33264910	-	3	32535	ALU-REF_864	20	33115812	33115812	292	284.9	1	2.92246	3.69545e-08	-0.385194	9.999e-05	1.58028e-07	PIGU	ALU	38.5501
ENSG00000103051_ALU-REF_797	ENSG00000103051	16	70514472	70557468	-	2	0	ALU-REF_797	16	70553010	70553010	292	291.202	0.999983	1.99299	5.40658e-09	0.394141	9.999e-05	1.13077e-08	COG4	ALU	27.4584
ENSG00000104723_ALU-NREF_1346	ENSG00000104723	8	15274725	15624158	+	3	0	ALU-NREF_1346	8	15548520	15548520	292	299.942	0.999982	2.96119	1.21174e-05	-0.351384	9.999e-05	2.73115e-05	TUSC3	ALU	88.3944
ENSG00000104763_ALU-NREF_1348	ENSG00000104763	8	17913935	17942494	-	6	-642	ALU-NREF_1348	8	17943136	17943136	292	292.356	1.00379	5.96454	3.12306e-05	-0.68815	9.999e-05	0.000178056	ASAH1	ALU	106.766
ENSG00000105202_ALU-REF_849	ENSG00000105202	19	40325099	40337054	-	1	67554	ALU-REF_849	19	40257545	40257545	292	284.757	0.999998	0.983898	0.000106373	0.371244	0.00019998	0.000127565	FBL	ALU	532.669
ENSG00000106013_ALU-REF_451	ENSG00000106013	7	117854728	117882785	+	2	11166	ALU-REF_451	7	117893951	117893951	292	287.495	1.00001	1.96957	9.35838e-06	-0.345973	9.999e-05	2.16042e-05	ANKRD7	ALU	1.43044
ENSG00000106052_ALU-NREF_1203	ENSG00000106052	7	27778951	28220362	+	2	964807	ALU-NREF_1203	7	29185169	29185169	292	289.362	1.00001	2.01566	0.000433886	0.384868	0.0009999	0.000928394	TAX1BP1	ALU	93.5302
ENSG00000106066_ALU-NREF_1203	ENSG00000106066	7	29034848	29553944	-	3	0	ALU-NREF_1203	7	29185169	29185169	292	279.838	0.999983	2.9296	2.96662e-05	0.580198	0.00029997	0.0001275	CPVL	ALU	51.5569
ENSG00000106868_ALU-REF_567	ENSG00000106868	9	114803066	114937688	-	2	0	ALU-REF_567	9	114902346	114902346	292	294.11	1.00002	2.012	4.16845e-11	-0.590941	9.999e-05	7.13669e-11	SUSD1	ALU	2.85727
ENSG00000107438_ALU-NREF_1722	ENSG00000107438	10	96997330	97050781	-	2	233343	ALU-NREF_1722	10	96763987	96763987	292	287.438	1.00002	2.01198	0.000474261	0.322325	0.00129987	0.00105681	PDLIM1	ALU	180.987
ENSG00000108294_ALU-NREF_2433	ENSG00000108294	17	36908990	36920484	+	3	-158095	ALU-NREF_2433	17	36750895	36750895	292	307.612	1.00002	3.11643	3.37559e-05	0.596068	0.00089991	6.48109e-05	PSMB3	ALU	230.901
ENSG00000108296_ALU-NREF_2432	ENSG00000108296	17	36956688	36981734	-	2	787345	ALU-NREF_2432	17	36169343	36169343	292	298.801	1.00002	1.98853	0.000520453	-0.357027	0.00129987	0.000889913	CWC25	ALU	11.2041
ENSG00000109158_L1-NREF_62	ENSG00000109158	4	46920918	47428461	-	2	0	L1-NREF_62	4	47007785	47007785	292	291.886	0.999979	1.99259	3.06036e-05	-0.384138	9.999e-05	6.12108e-05	GABRA4	L1	0.184112
ENSG00000109323_L1-REF_34	ENSG00000109323	4	103552661	103682151	-	5	764875	L1-REF_34	4	102787786	102787786	292	304.362	1.00001	4.99217	3.58306e-06	3.73576	0.00329967	1.11274e-05	MANBA	L1	25.7704
ENSG00000111052_ALU-NREF_2014	ENSG00000111052	12	81186300	81650533	-	1	0	ALU-NREF_2014	12	81315235	81315235	292	296.149	1	0.997187	0.000407713	0.348041	0.00079992	0.000369658	LIN7A	ALU	9.66471
ENSG00000111676_ALU-NREF_1903	ENSG00000111676	12	7033627	7051484	+	3	552499	ALU-NREF_1903	12	7603983	7603983	292	295.878	0.999992	2.95662	0.000179502	-0.287419	0.00079992	0.000480529	ATN1	ALU	21.8714
ENSG00000111834_ALU-NREF_1114	ENSG00000111834	6	116937643	116954148	+	4	-38957	ALU-NREF_1114	6	116898686	116898686	292	296.89	0.999993	3.49086	5.45978e-07	0.438105	9.999e-05	1.53236e-06	RSPH4A	ALU	0.443822
ENSG00000113273_ALU-REF_276	ENSG00000113273	5	78073033	78281910	-	7	0	ALU-REF_276	5	78276749	78276749	292	296.577	0.996178	6.12983	4.1871e-08	0.436543	9.999e-05	2.13722e-07	ARSB	ALU	6.7261
ENSG00000113303_ALU-NREF_949	ENSG00000113303	5	180326078	180377906	+	4	0	ALU-NREF_949	5	180349604	180349604	292	284.971	1.00002	3.85994	1.35317e-27	-0.790347	9.999e-05	2.20313e-26	BTNL8	ALU	0.334718
ENSG00000114405_ALU-NREF_496	ENSG00000114405	3	62304649	62321888	+	2	887124	ALU-NREF_496	3	63209012	63209012	292	290.688	0.999988	1.99654	0.000343856	0.258585	0.0009999	0.000707954	C3orf14	ALU	21.5914
ENSG00000116199_ALU-NREF_145	ENSG00000116199	1	178994940	179045697	+	3	446269	ALU-NREF_145	1	179491966	179491966	292	288.806	1.00002	2.97934	0.000200764	-0.236646	0.00119988	0.000648116	FAM20B	ALU	27.0946
ENSG00000116752_ALU-NREF_104	ENSG00000116752	1	115110179	115124260	-	2	-77141	ALU-NREF_104	1	115201401	115201401	292	300.783	0.999993	1.96802	1.2687e-05	0.346641	9.999e-05	1.84857e-05	BCAS2	ALU	85.4348
ENSG00000116785_ALU-NREF_168	ENSG00000116785	1	196743926	196763203	+	1	16000	ALU-NREF_168	1	196779203	196779203	292	286.81	1	0.989052	4.20539e-16	-0.829846	9.999e-05	7.55856e-16	CFHR3	ALU	1.06493
ENSG00000117399_ALU-REF_6	ENSG00000117399	1	43824627	43828874	+	2	28582	ALU-REF_6	1	43857456	43857456	292	290.731	1	1.92446	2.48941e-08	0.38753	9.999e-05	5.13631e-08	CDC20	ALU	176.841
ENSG00000117448_ALU-REF_8	ENSG00000117448	1	46016216	46035721	+	2	330387	ALU-REF_8	1	46366108	46366108	292	294.367	0.999992	1.93513	1.58128e-06	0.253037	9.999e-05	2.77654e-06	AKR1A1	ALU	196.536
ENSG00000118495_ALU-NREF_1162	ENSG00000118495	6	144261438	144385735	-	2	78474	ALU-NREF_1162	6	144182964	144182964	292	319.104	0.999994	2.15187	9.49349e-05	0.649908	0.00109989	9.6659e-05	PLAGL1	ALU	1.19295
ENSG00000119139_ALU-REF_547	ENSG00000119139	9	71736210	71870124	+	1	0	ALU-REF_547	9	71777927	71777927	292	295.864	1	1.02214	8.44474e-05	-0.247671	9.999e-05	7.74509e-05	TJP2	ALU	73.8119
ENSG00000119771_L1-NREF_18	ENSG00000119771	2	23608089	23931481	+	1	-417073	L1-NREF_18	2	23191016	23191016	292	289.548	1.00001	1.00808	2.4654e-14	-0.517973	9.999e-05	3.18603e-14	KLHL29	L1	2.39735
ENSG00000122912_ALU-REF_593	ENSG00000122912	10	70237757	70287231	-	4	0	ALU-REF_593	10	70272097	70272097	292	289.419	0.999991	3.92323	0.000193547	-0.363377	0.00139986	0.000810498	SLC25A16	ALU	6.82508
ENSG00000123106_ALU-NREF_1938	ENSG00000123106	12	28286183	28732883	+	6	-11592	ALU-NREF_1938	12	28274591	28274591	292	295.351	0.981003	5.91313	1.30759e-09	0.102001	9.999e-05	8.96875e-09	CCDC91	ALU	23.5886
ENSG00000123472_ALU-REF_8	ENSG00000123472	1	47098410	47184824	-	2	732302	ALU-REF_8	1	46366108	46366108	292	302.779	1	1.93916	0.000557821	0.273334	0.00139986	0.000853947	ATPAF1	ALU	60.8837
ENSG00000125869_ALU-NREF_2560	ENSG00000125869	20	9495006	9511171	+	5	61113	ALU-NREF_2560	20	9572284	9572284	292	293.012	1.00001	5.05029	4.61361e-05	-0.482641	0.00039996	0.00022598	LAMP5	ALU	0.539736
ENSG00000126775_ALU-NREF_2224	ENSG00000126775	14	55833111	55878576	-	3	37240	ALU-NREF_2224	14	55795871	55795871	292	294.096	0.999987	2.95561	0.000352231	-0.192137	0.00129987	0.000990973	ATG14	ALU	10.679
ENSG00000127914_ALU-NREF_1267	ENSG00000127914	7	91570182	91739987	+	1	11565	ALU-NREF_1267	7	91751552	91751552	292	291.929	0.999995	0.994882	5.99649e-08	-0.168481	9.999e-05	5.98841e-08	AKAP9	ALU	21.6453
ENSG00000128052_ALU-REF_170	ENSG00000128052	4	55944645	55991756	-	4	-6799	ALU-REF_170	4	55998555	55998555	292	293.725	1.00001	4.00423	4.42355e-06	-0.382656	9.999e-05	1.65948e-05	KDR	ALU	29.975
ENSG00000128578_ALU-NREF_1299	ENSG00000128578	7	129074275	129128240	+	2	-7700	ALU-NREF_1299	7	129066575	129066575	292	293.212	1.00001	1.9877	1.78794e-07	0.420331	9.999e-05	3.35098e-07	STRIP2	ALU	6.09746
ENSG00000128791_ALU-REF_823	ENSG00000128791	18	9334766	9402418	+	3	0	ALU-REF_823	18	9385392	9385392	292	289.519	1	2.95947	2.8223e-10	0.38797	9.999e-05	9.9332e-10	TWSG1	ALU	28.2708
ENSG00000130347_ALU-REF_379	ENSG00000130347	6	107018904	107077373	-	1	35281	ALU-REF_379	6	106983623	106983623	292	291.159	1.00001	1.00557	0.000862698	-0.482202	0.00159984	0.000882564	RTN4IP1	ALU	20.8136
ENSG00000130943_ALU-NREF_2638	ENSG00000130943	22	46651561	46659219	-	1900-01-02	28510	ALU-NREF_2638	22	46623051	46623051	292	293.44	0.999982	2.02099	3.82176e-05	-0.57776	0.00019998	7.3915e-05	PKDREJ	ALU	0.147977
ENSG00000131203_ALU-REF_482	ENSG00000131203	8	39759795	39785963	+	3	0	ALU-REF_482	8	39765315	39765315	292	292.87	1.00002	2.95649	8.78536e-06	0.323035	0.00019998	2.51798e-05	IDO1	ALU	55.6527
ENSG00000131242_ALU-NREF_2424	ENSG00000131242	17	29718643	29865236	+	2	0	ALU-NREF_2424	17	29842491	29842491	292	292.499	1	2.0238	0.000233635	-0.231426	0.00059994	0.000466967	RAB11FIP4	ALU	30.8848
ENSG00000132434_ALU-NREF_1233	ENSG00000132434	7	55433142	55501435	+	3	-63910	ALU-NREF_1233	7	55369232	55369232	292	294.809	1.00002	3.00345	2.77701e-06	0.36048	9.999e-05	7.4679e-06	LANCL2	ALU	10.085
ENSG00000132635_ALU-REF_851	ENSG00000132635	20	2815961	3019722	-	4	0	ALU-REF_851	20	2864002	2864002	292	297.161	0.999996	4.07569	4.1391e-05	-0.205924	0.00029997	0.00014422	PCED1A	ALU	12.9802
ENSG00000133636_ALU-NREF_2017	ENSG00000133636	12	86268074	86276770	+	3	-95611	ALU-NREF_2017	12	86172463	86172463	292	296.89	0.999992	2.88925	1.57933e-24	1.09134	9.999e-05	1.88475e-24	NTS	ALU	86.4864
ENSG00000133710_ALU-REF_316	ENSG00000133710	5	147405247	147516852	+	3	0	ALU-REF_316	5	147462156	147462156	292	301.553	1	3.11285	8.13001e-05	-0.267945	0.00039996	0.000193378	SPINK5	ALU	3.58485
ENSG00000133818_ALU-REF_620	ENSG00000133818	11	14299473	14386052	-	2	0	ALU-REF_620	11	14348311	14348311	292	287.281	1.00002	1.96618	1.16259e-05	0.337089	9.999e-05	2.69017e-05	RRAS2	ALU	143.419
ENSG00000134058_L1-NREF_103	ENSG00000134058	5	68530669	68573250	+	1	-267194	L1-NREF_103	5	68263475	68263475	292	286.14	1.00001	1.00507	0.000405265	0.281956	0.00069993	0.000466002	CDK7	L1	39.7365
ENSG00000134330_ALU-NREF_240	ENSG00000134330	2	9613788	9695921	+	2	192880	ALU-NREF_240	2	9888801	9888801	292	289.22	0.999995	2.0047	2.98183e-05	-0.337343	9.999e-05	6.52432e-05	IAH1	ALU	22.3405
ENSG00000134905_ALU-NREF_2187	ENSG00000134905	13	111293760	111373421	-	2	0	ALU-NREF_2187	13	111326782	111326782	292	303.007	1.00001	2.03391	3.06554e-07	-0.598323	9.999e-05	3.73573e-07	CARS2	ALU	30.2203
ENSG00000135372_ALU-REF_628	ENSG00000135372	11	34127150	34169217	+	5	-18281	ALU-REF_628	11	34108869	34108869	292	291.145	1.00003	4.99582	0.000144498	0.417425	0.00069993	0.000737956	NAT10	ALU	44.5478
ENSG00000135502_ALU-NREF_1981	ENSG00000135502	12	58013311	58027138	+	3	56140	ALU-NREF_1981	12	58083278	58083278	292	300.141	1.00001	2.30559	0.000164176	0.404096	0.00029997	0.000306589	SLC26A10	ALU	0.649574
ENSG00000135870_ALU-REF_22	ENSG00000135870	1	173900353	173991435	-	2	0	ALU-REF_22	1	173944738	173944738	292	298.074	1.00002	1.98536	0.000172221	0.185689	0.00049995	0.000292391	RC3H1	ALU	7.05675
ENSG00000135912_ALU-NREF_410	ENSG00000135912	2	219575569	219620139	+	1	0	ALU-NREF_410	2	219576609	219576609	292	286.154	1.00002	0.983731	9.09998e-05	0.42541	9.999e-05	0.000105316	TTLL4	ALU	50.3903
ENSG00000136487_ALU-NREF_2455	ENSG00000136487	17	61957579	61959295	-	2	225886	ALU-NREF_2455	17	61731693	61731693	292	293.625	0.999988	2.0148	1.3231e-05	0.491779	9.999e-05	2.5223e-05	GH2	ALU	0.822324
ENSG00000136783_ALU-REF_562	ENSG00000136783	9	107509970	107522403	+	2	-108996	ALU-REF_562	9	107400974	107400974	292	292.157	1	2.00744	0.000493818	0.324091	0.00089991	0.000987597	NIPSNAP3A	ALU	17.1043
ENSG00000136861_ALU-NREF_1606	ENSG00000136861	9	123151148	123342448	-	1	95967	ALU-NREF_1606	9	123055181	123055181	292	298.145	1	1.0173	0.00118305	-0.186936	0.00239976	0.00106752	CDK5RAP2	ALU	25.0592
ENSG00000136982_ALU-NREF_1458	ENSG00000136982	8	120846217	120868250	-	3	45425	ALU-NREF_1458	8	120800792	120800792	292	293.583	0.999999	3.05169	2.08366e-05	0.306419	0.00029997	6.03863e-05	DSCC1	ALU	47.5737
ENSG00000138778_L1-NREF_68	ENSG00000138778	4	104026964	104119566	-	5	-95120	L1-NREF_68	4	104214686	104214686	292	291.444	1	4.95548	2.51885e-05	-0.305333	0.00029997	0.000127051	CENPE	L1	25.1156
ENSG00000138792_ALU-REF_201	ENSG00000138792	4	111286890	111486441	+	2	0	ALU-REF_201	4	111383207	111383207	292	299.143	0.999997	2.03512	2.29235e-10	0.587893	9.999e-05	2.8182e-10	ENPEP	ALU	0.70914
ENSG00000139428_ALU-NREF_2041	ENSG00000139428	12	109991543	110035067	-	1	61372	ALU-NREF_2041	12	109930171	109930171	292	289.562	1	1.00409	5.22223e-05	0.434695	0.00019998	5.63637e-05	MMAB	ALU	19.7844
ENSG00000140557_ALU-NREF_2355	ENSG00000140557	15	92937059	93011958	+	3	555210	ALU-NREF_2355	15	93567168	93567168	292	293.212	1	2.95466	0.000193749	0.554679	0.00119988	0.000555023	ST8SIA2	ALU	2.4325
ENSG00000140905_ALU-NREF_2396	ENSG00000140905	16	81115567	81130008	-	2	898128	ALU-NREF_2396	16	80217439	80217439	292	299.357	0.999983	2.00576	8.64314e-05	-0.273864	0.00029997	0.000141144	GCSH	ALU	174.978
ENSG00000141750_ALU-NREF_2433	ENSG00000141750	17	37366790	37382125	-	1	615895	ALU-NREF_2433	17	36750895	36750895	292	290.888	0.999989	0.99837	0.000265386	-0.655482	0.00049995	0.000272248	STAC2	ALU	2.34707
ENSG00000144199_ALU-NREF_309	ENSG00000144199	2	97749321	97760619	-	1	-821538	ALU-NREF_309	2	98582157	98582157	292	292.413	1.00001	0.996155	0.000148536	0.250858	0.00019998	0.000146352	FAHD2B	ALU	34.1185
ENSG00000144366_ALU-NREF_383	ENSG00000144366	2	189156397	189460653	+	3	0	ALU-NREF_383	2	189163017	189163017	292	293.597	0.999991	2.97117	0.00029142	0.33855	0.00089991	0.000833086	GULP1	ALU	140.727
ENSG00000144488_ALU-NREF_426	ENSG00000144488	2	239008799	239041928	+	3	-794830	ALU-NREF_426	2	238213969	238213969	292	299.913	0.999992	3.05755	0.000137037	0.460931	0.00079992	0.000339827	ESPNL	ALU	0.904845
ENSG00000144580_ALU-NREF_410	ENSG00000144580	2	219433304	219461803	+	1	114806	ALU-NREF_410	2	219576609	219576609	292	289.462	1	1.0039	0.000139528	0.360523	0.00019998	0.000149787	RQCD1	ALU	59.3082
ENSG00000144791_ALU-NREF_485	ENSG00000144791	3	45596887	45727830	+	4	-54225	ALU-NREF_485	3	45542662	45542662	292	302.194	1.00001	4.034	3.25788e-09	0.397822	9.999e-05	7.00752e-09	LIMD1	ALU	11.4594
ENSG00000145592_L1-REF_43	ENSG00000145592	5	40825365	40835437	-	3	-764004	L1-REF_43	5	41599441	41599441	292	293.882	0.999998	2.89747	0.000315153	-0.530972	0.00079992	0.000872951	RPL37	L1	1999.1
ENSG00000146063_ALU-NREF_949	ENSG00000146063	5	180649500	180662809	+	3	-299896	ALU-NREF_949	5	180349604	180349604	292	298.017	1	3.03234	0.000224237	-0.248958	0.00109989	0.000585353	TRIM41	ALU	10.386
ENSG00000147316_L1-NREF_171	ENSG00000147316	8	6264114	6501144	+	5	-434832	L1-NREF_171	8	5829282	5829282	292	295.094	1.00002	5.02189	2.23401e-05	-0.216408	0.00019998	0.000101465	MCPH1	L1	17.2899
ENSG00000148602_ALU-NREF_1708	ENSG00000148602	10	85991350	86001217	-	2	8091	ALU-NREF_1708	10	85983259	85983259	292	293.226	1.00001	2.00532	3.55222e-05	0.390417	9.999e-05	6.85808e-05	LRIT1	ALU	0.0521714
ENSG00000148688_ALU-NREF_1717	ENSG00000148688	10	92631474	92668312	+	5	-416402	ALU-NREF_1717	10	92215072	92215072	292	286.596	1.00002	4.31523	0.000108688	0.266971	0.00079992	0.000543216	RPP30	ALU	83.7269
ENSG00000150556_ALU-REF_73	ENSG00000150556	2	149894622	150071776	+	3	555195	ALU-REF_73	2	150626971	150626971	292	300.754	1.00002	2.94804	0.000221686	-0.491601	0.00069993	0.000525382	LYPD6B	ALU	2.70321
ENSG00000150961_ALU-NREF_707	ENSG00000150961	4	119643979	119759838	-	6	-14898	ALU-NREF_707	4	119774736	119774736	292	294.31	0.97729	5.8068	0.00010688	-0.377459	0.00069993	0.000695198	SEC24D	ALU	49.5891
ENSG00000151065_ALU-NREF_1898	ENSG00000151065	12	2055221	2802108	-	2	0	ALU-NREF_1898	12	2089856	2089856	292	297.033	1.00001	2.04761	7.88941e-13	0.595696	9.999e-05	1.02866e-12	DCP1B	ALU	19.8044
ENSG00000151327_ALU-NREF_2201	ENSG00000151327	14	35514114	35786699	+	3	-81517	ALU-NREF_2201	14	35432597	35432597	292	296.063	0.999997	2.89475	0.000196329	0.429356	0.00079992	0.000512721	FAM177A1	ALU	48.4399
ENSG00000151917_ALU-NREF_1024	ENSG00000151917	6	56819774	56892140	+	3	-117052	ALU-NREF_1024	6	56702722	56702722	292	287.309	0.999975	2.97212	0.000243198	-0.3814	0.00089991	0.000811269	BEND6	ALU	2.98243
ENSG00000152086_SVA-NREF_12	ENSG00000152086	2	130949319	130956034	-	2	-12455	SVA-NREF_12	2	130968489	130968489	292	295.294	1.00002	2.03091	3.75094e-11	-0.487843	9.999e-05	5.91562e-11	TUBA3E	SVA	0.0532165
ENSG00000152208_ALU-NREF_687	ENSG00000152208	4	93225551	94695707	+	3	0	ALU-NREF_687	4	93363294	93363294	292	290.047	0.999982	2.69778	8.17846e-55	1.18	9.999e-05	5.00968e-54	GRID2	ALU	18.8133
ENSG00000152642_ALU-REF_112	ENSG00000152642	3	32147182	32210205	+	5	0	ALU-REF_112	3	32203862	32203862	292	290.517	1.00003	4.84863	1.31611e-05	-0.331245	9.999e-05	6.7108e-05	GPD1L	ALU	4.97751
ENSG00000153721_ALU-NREF_1171	ENSG00000153721	6	154708639	154831793	-	4	-8861	ALU-NREF_1171	6	154840654	154840654	292	292.342	0.999991	4.03534	0.000109668	-0.447042	0.00049995	0.000438409	CNKSR3	ALU	6.23355
ENSG00000154227_ALU-NREF_2363	ENSG00000154227	15	100940601	101085200	-	5	41622	ALU-NREF_2363	15	100898979	100898979	292	286.796	1.00001	4.19744	0.000198298	0.292856	0.00119988	0.000949009	CERS3	ALU	0.550973
ENSG00000158163_SVA-NREF_18	ENSG00000158163	3	137780833	137834660	-	3	-10726	SVA-NREF_18	3	137845386	137845386	292	293.839	1.00002	2.97994	0.000254517	-0.264905	0.00329967	0.000724769	DZIP1L	SVA	4.12172
ENSG00000159592_ALU-REF_7	ENSG00000159592	1	46092977	46216322	-	2	0	ALU-REF_7	1	46207287	46207287	292	306.187	0.999982	1.9816	4.95369e-05	-0.257544	0.00019998	6.43655e-05	GPBP1L1	ALU	96.5673
ENSG00000162869_ALU-NREF_266	ENSG00000162869	2	48667738	48742525	+	3	-391204	ALU-NREF_266	2	48276534	48276534	292	292.228	1.00002	2.98958	0.000303401	0.311704	0.0009999	0.000901692	PPP1R21	ALU	14.9791
ENSG00000162881_ALU-NREF_258	ENSG00000162881	2	42989643	42991401	-	1	-32675	ALU-NREF_258	2	43024076	43024076	292	294.039	0.999985	0.996845	5.79789e-08	0.363017	9.999e-05	5.19855e-08	OXER1	ALU	0.990241
ENSG00000162882_ALU-NREF_258	ENSG00000162882	2	42994230	43019733	-	1	-4343	ALU-NREF_258	2	43024076	43024076	292	296.719	0.999985	1.00509	1.65284e-10	0.464449	9.999e-05	1.18491e-10	HAAO	ALU	3.46526
ENSG00000163466_ALU-NREF_408	ENSG00000163466	2	219081818	219119079	+	2	-901046	ALU-NREF_408	2	218180772	218180772	292	293.511	0.999997	1.97798	0.000486553	0.222329	0.00139986	0.000930199	ARPC2	ALU	227.857
ENSG00000163682_ALU-REF_166	ENSG00000163682	4	39455745	39460568	-	2	424668	ALU-REF_166	4	39031077	39031077	292	301.866	0.999988	2.05312	4.8188e-06	-0.356208	9.999e-05	6.8404e-06	RPL9	ALU	1741.76
ENSG00000164066_ALU-NREF_721	ENSG00000164066	4	128544427	128647892	+	1	559356	ALU-NREF_721	4	129207248	129207248	292	292.684	0.999985	0.987874	1.64978e-07	0.418773	9.999e-05	1.57681e-07	INTU	ALU	9.79604
ENSG00000164080_ALU-REF_119	ENSG00000164080	3	51575161	51738339	+	3	971499	ALU-REF_119	3	52709838	52709838	292	287.937	1.00002	2.90797	1.63355e-06	0.260529	0.00019998	5.61044e-06	RAD54L2	ALU	9.95815
ENSG00000164088_ALU-REF_119	ENSG00000164088	3	52279842	52284613	+	2	425225	ALU-REF_119	3	52709838	52709838	292	291.273	0.999996	1.97179	4.52786e-05	0.237715	0.00019998	9.12561e-05	PPM1M	ALU	3.36904
ENSG00000164105_ALU-NREF_752	ENSG00000164105	4	174291121	174298683	+	4	-246893	ALU-NREF_752	4	174044228	174044228	292	291.116	1.00001	3.85405	0.000176837	0.287243	0.00059994	0.000696935	SAP30	ALU	24.9245
ENSG00000164142_L1-REF_40	ENSG00000164142	4	152330369	152584784	+	2	0	L1-REF_40	4	152340708	152340708	292	298.231	0.999992	2.01061	2.07374e-11	0.376352	9.999e-05	2.55484e-11	FAM160A1	L1	13.598
ENSG00000164323_ALU-REF_237	ENSG00000164323	4	186080820	186317053	-	7	0	ALU-REF_237	4	186198866	186198866	292	294.609	0.985549	6.78461	5.9639e-05	0.160133	0.00049995	0.000422285	KIAA1430	ALU	42.9593
ENSG00000164742_ALU-NREF_1222	ENSG00000164742	7	45613740	45762715	+	2	26498	ALU-NREF_1222	7	45789213	45789213	292	298.459	0.999999	2.01276	5.56124e-05	0.36831	0.00029997	9.25737e-05	ADCY1	ALU	5.50548
ENSG00000164808_ALU-NREF_1375	ENSG00000164808	8	48173168	48648868	+	2	964051	ALU-NREF_1375	8	49612919	49612919	292	294.609	1	2.01203	0.000511679	0.406597	0.00049995	0.000971301	SPIDR	ALU	32.411
ENSG00000165325_ALU-REF_644	ENSG00000165325	11	93063138	93171653	+	3	0	ALU-REF_644	11	93102801	93102801	292	298.887	0.999979	3.0199	6.61995e-05	0.40659	0.00029997	0.000163936	CCDC67	ALU	0.609127
ENSG00000165406_ALU-NREF_1661	ENSG00000165406	10	45950036	46090354	-	1	0	ALU-NREF_1661	10	46074888	46074888	292	286.839	0.999997	0.984465	0.000497957	0.392452	0.00039996	0.000550077	2019-03-08	ALU	7.83131
ENSG00000165588_ALU-NREF_2226	ENSG00000165588	14	57267426	57277197	-	4	829501	ALU-NREF_2226	14	56437925	56437925	292	294.695	1.00001	3.97115	0.000267365	-0.282632	0.00169983	0.000993968	OTX2	ALU	85.6148
ENSG00000165752_ALU-NREF_1760	ENSG00000165752	10	134020997	134145351	-	1	-143194	ALU-NREF_1760	10	134288545	134288545	292	290.146	1.00001	0.985903	0.000699242	0.479258	0.00089991	0.000717002	STK32C	ALU	17.6789
ENSG00000165970_ALU-NREF_1789	ENSG00000165970	11	20620947	20680831	+	1	-657935	ALU-NREF_1789	11	19963012	19963012	292	303.52	1.00001	1.03081	0.000228114	0.508365	0.00079992	0.000176696	SLC6A5	ALU	0.0139209
ENSG00000165973_ALU-NREF_1789	ENSG00000165973	11	20691118	21597227	+	2	-728106	ALU-NREF_1789	11	19963012	19963012	292	334.046	1	2.17459	6.0586e-06	0.610496	0.00049995	2.82856e-06	NELL1	ALU	0.473607
ENSG00000166349_L1-NREF_206	ENSG00000166349	11	36532260	36694823	+	3	0	L1-NREF_206	11	36558490	36558490	292	294.566	0.999995	3.0144	7.85779e-05	0.473517	0.00089991	0.000220274	RAG1	L1	0.888403
ENSG00000166436_ALU-NREF_1777	ENSG00000166436	11	8633585	8693413	-	5	-193904	ALU-NREF_1777	11	8887317	8887317	292	297.389	0.99999	4.99047	1.81432e-06	-0.589231	9.999e-05	7.27363e-06	TRIM66	ALU	1.4281
ENSG00000166452_ALU-NREF_1777	ENSG00000166452	11	8932687	8954553	+	5	-45370	ALU-NREF_1777	11	8887317	8887317	292	296.192	1.00001	4.9982	3.72644e-19	0.988864	9.999e-05	1.03998e-18	AKIP1	ALU	16.6944
ENSG00000168288_ALU-REF_73	ENSG00000168288	2	150426149	150444330	-	3	-182641	ALU-REF_73	2	150626971	150626971	292	296.22	0.999992	2.95811	0.000205565	-0.470461	0.00049995	0.000546776	MMADHC	ALU	179.906
ENSG00000168827_ALU-REF_140	ENSG00000168827	3	158362068	158410364	+	3	-245166	ALU-REF_140	3	158116902	158116902	292	295.85	0.999991	2.87982	0.000205152	0.224924	0.00089991	0.000536205	GFM1	ALU	41.3802
ENSG00000169062_ALU-NREF_2190	ENSG00000169062	13	115047060	115071283	+	1	-165039	ALU-NREF_2190	13	114882021	114882021	292	290.874	0.999986	0.982491	2.71817e-05	0.185205	9.999e-05	2.76826e-05	UPF3A	ALU	70.0855
ENSG00000170788_ALU-NREF_1706	ENSG00000170788	10	82095862	82127829	-	1	-914936	ALU-NREF_1706	10	83042765	83042765	292	297.347	0.999989	0.996677	6.16976e-05	-0.223356	9.999e-05	5.26478e-05	DYDC1	ALU	0.991467
ENSG00000170927_L1-REF_51	ENSG00000170927	6	51480099	51952423	-	5	0	L1-REF_51	6	51739563	51739563	292	295.707	0.999973	4.88948	2.28355e-14	1.19403	9.999e-05	7.66762e-14	PKHD1	L1	0.0735594
ENSG00000170955_ALU-NREF_1766	ENSG00000170955	11	6340177	6341877	-	4	-17809	ALU-NREF_1766	11	6359686	6359686	292	293.796	1.00001	4.01081	5.89935e-08	0.616263	9.999e-05	2.15472e-07	PRKCDBP	ALU	14.0114
ENSG00000171222_ALU-NREF_2579	ENSG00000171222	20	34541540	34547394	-	2	82974	ALU-NREF_2579	20	34458566	34458566	292	291.729	1.00002	2.03325	3.68934e-13	-0.573605	9.999e-05	7.68705e-13	SCAND1	ALU	39.1723
ENSG00000171310_ALU-NREF_2034	ENSG00000171310	12	104849074	105155792	+	4	282586	ALU-NREF_2034	12	105438378	105438378	292	296.391	1.00002	4.11586	6.72148e-05	-0.428442	0.00039996	0.000243725	CHST11	ALU	7.4923
ENSG00000171853_ALU-NREF_230	ENSG00000171853	2	3383447	3488865	+	3	0	ALU-NREF_230	2	3479251	3479251	292	293.027	1.00002	3.06569	8.34948e-05	0.342341	0.00039996	0.000248624	TRAPPC12	ALU	42.9841
ENSG00000172239_ALU-NREF_826	ENSG00000172239	5	43526370	43557860	-	4	0	ALU-NREF_826	5	43541805	43541805	292	288.264	1.00002	3.86075	8.71319e-05	-0.433275	9.999e-05	0.000373307	PAIP1	ALU	116.16
ENSG00000173041_ALU-NREF_1243	ENSG00000173041	7	63980263	64023484	-	1	100067	ALU-NREF_1243	7	63880196	63880196	292	292.941	1.00001	0.988806	0.000299003	0.278172	0.00019998	0.000289047	ZNF680	ALU	25.6663
ENSG00000173272_ALU-REF_70	ENSG00000173272	2	132222474	132250316	-	2	378134	ALU-REF_70	2	131844340	131844340	292	292.699	1.00001	1.97987	0.000387024	-0.295441	0.00079992	0.000753793	MZT2A	ALU	72.6524
ENSG00000173295_ALU-NREF_1332	ENSG00000173295	8	8086118	8102387	+	2	817740	ALU-NREF_1332	8	8920127	8920127	292	306.629	0.999995	1.97249	1.12569e-09	0.463725	9.999e-05	8.55332e-10	FAM86B3P	ALU	10.7096
ENSG00000174080_SVA-NREF_81	ENSG00000174080	11	66330935	66336312	-	3	168821	SVA-NREF_81	11	66162114	66162114	292	288.607	0.999997	2.91225	7.04142e-08	-0.438393	9.999e-05	2.44196e-07	CTSF	SVA	13.4191
ENSG00000174132_ALU-REF_297	ENSG00000174132	5	99871010	99922445	+	4	1089	ALU-REF_297	5	99923534	99923534	292	297.033	1	3.91963	0.00028367	0.265257	0.00139986	0.000984438	FAM174A	ALU	6.11538
ENSG00000175104_L1-NREF_206	ENSG00000175104	11	36508578	36531822	-	2	-26668	L1-NREF_206	11	36558490	36558490	292	285.384	1.00002	1.95972	5.52284e-06	0.536155	9.999e-05	1.38233e-05	TRAF6	L1	6.1126
ENSG00000175352_ALU-NREF_1777	ENSG00000175352	11	9002124	9025596	-	5	114807	ALU-NREF_1777	11	8887317	8887317	292	292.77	0.999979	4.85004	1.58314e-05	0.518425	9.999e-05	7.48393e-05	NRIP3	ALU	3.68727
ENSG00000175800_ALU-NREF_1764	ENSG00000175800	11	4399513	4400457	+	5	507506	ALU-NREF_1764	11	4907963	4907963	292	292.813	1.00002	4.95021	0.00011118	0.25618	0.00119988	0.000538138	OR52B3P	ALU	0.0913791
ENSG00000176454_ALU-REF_769	ENSG00000176454	15	34651107	34659479	-	3	-82261	ALU-REF_769	15	34741740	34741740	292	291.102	1.00002	3.00118	0.000235516	-0.184607	0.00109989	0.000722424	LPCAT4	ALU	39.5035
ENSG00000176894_ALU-NREF_2064	ENSG00000176894	12	133264193	133299228	+	2	-80705	ALU-NREF_2064	12	133183488	133183488	292	289.305	0.999981	1.99006	5.77764e-07	-0.4053	9.999e-05	1.29648e-06	PXMP2	ALU	15.2595
ENSG00000178460_ALU-REF_495	ENSG00000178460	8	67782985	67834283	+	1	893038	ALU-REF_495	8	68727321	68727321	292	300.127	1.00002	1.01605	0.000252304	-0.233702	0.00049995	0.000210078	MCMDC2	ALU	3.94725
ENSG00000179051_ALU-REF_4	ENSG00000179051	1	17733257	17766220	-	1	48492	ALU-REF_4	1	17684765	17684765	292	293.112	1.00002	1.00062	0.000582471	-0.208143	0.00079992	0.0005688	RCC2	ALU	193.77
ENSG00000179097_ALU-NREF_508	ENSG00000179097	3	88039847	88042919	+	4	-388914	ALU-NREF_508	3	87650933	87650933	292	290.375	1	3.92906	4.74667e-06	0.53146	0.00019998	1.98214e-05	HTR1F	ALU	0.473021
ENSG00000179979_ALU-NREF_616	ENSG00000179979	4	1385341	1389780	+	2	-83508	ALU-NREF_616	4	1301833	1301833	292	296.206	0.999988	2.04347	0.000173982	-0.276956	0.00079992	0.000319116	CRIPAK	ALU	2.97076
ENSG00000183087_ALU-NREF_2190	ENSG00000183087	13	114523523	114567046	-	1	-314975	ALU-NREF_2190	13	114882021	114882021	292	287.922	0.999988	0.981976	0.000677578	0.226897	0.00089991	0.000725866	GAS6	ALU	19.3246
ENSG00000183137_ALU-NREF_1098	ENSG00000183137	6	109416314	109485135	+	1	617847	ALU-NREF_1098	6	110102982	110102982	292	293.668	1.00001	1.00292	0.000253736	0.26513	0.00049995	0.000244283	CEP57L1	ALU	22.2582
ENSG00000183324_ALU-NREF_2334	ENSG00000183324	15	73735500	73926475	+	1900-01-01	56844	ALU-NREF_2334	15	73983319	73983319	292	289.747	1	0.995246	6.78077e-05	0.300774	9.999e-05	7.20047e-05	C15orf60	ALU	0.0805523
ENSG00000183722_ALU-REF_710	ENSG00000183722	13	39917030	40177665	-	2	0	ALU-REF_710	13	40028470	40028470	292	288.179	0.999983	2.00193	2.28425e-13	0.489536	9.999e-05	6.54848e-13	LHFP	ALU	4.552
ENSG00000185052_ALU-REF_860	ENSG00000185052	20	19193291	19703581	+	3	-23229	ALU-REF_860	20	19170062	19170062	292	289.106	0.999983	2.99056	5.08092e-17	-0.857803	9.999e-05	2.16598e-16	SLC24A3	ALU	1.52785
ENSG00000185272_ALU-NREF_2589	ENSG00000185272	21	15588452	15600693	+	3	52174	ALU-NREF_2589	21	15652867	15652867	292	290.517	0.999996	2.95159	3.51558e-09	0.498424	9.999e-05	1.13673e-08	RBM11	ALU	8.40851
ENSG00000185442_ALU-NREF_2354	ENSG00000185442	15	93160674	93353114	-	3	-19647	ALU-NREF_2354	15	93372761	93372761	292	284.957	0.999985	2.899	3.19395e-05	-0.393427	0.00019998	0.000115399	FAM174B	ALU	11.7998
ENSG00000185610_ALU-NREF_1971	ENSG00000185610	12	45408456	45444882	-	6	0	ALU-NREF_1971	12	45419555	45419555	292	289.448	1	5.02098	6.60842e-13	0.56976	9.999e-05	4.17718e-12	DBX2	ALU	0.189915
ENSG00000186205_ALU-NREF_189	ENSG00000186205	1	220960102	220987735	+	2	-5743	ALU-NREF_189	1	220954359	220954359	292	295.964	1.00002	2.01645	2.56287e-07	-0.782337	9.999e-05	4.28601e-07	2019-03-01	ALU	30.6834
ENSG00000186472_ALU-NREF_1261	ENSG00000186472	7	82383330	82792246	-	7	-59510	ALU-NREF_1261	7	82851756	82851756	292	288.564	0.99188	6.28031	4.47578e-05	-0.313825	0.00019998	0.000333767	PCLO	ALU	1.80406
ENSG00000187812_ALU-NREF_2335	ENSG00000187812	15	76067895	76079239	+	1	746780	ALU-NREF_2335	15	76826019	76826019	292	312.232	0.999991	1.02151	0.000557375	0.469008	0.00229977	0.000365633	RP11-24M17.5	ALU	0.0959075
ENSG00000188234_ALU-NREF_1661	ENSG00000188234	10	46321043	46349323	-	1	246155	ALU-NREF_1661	10	46074888	46074888	292	292.97	1	1.01442	2.11802e-05	0.597124	9.999e-05	2.08172e-05	AGAP4	ALU	4.21562
ENSG00000188730_ALU-REF_420	ENSG00000188730	7	49813258	50199426	+	4	-261192	ALU-REF_420	7	49552066	49552066	292	293.668	1.00002	4.07085	3.33917e-09	-0.468905	9.999e-05	1.22609e-08	VWC2	ALU	0.526851
ENSG00000189091_ALU-REF_797	ENSG00000189091	16	70557692	70608820	+	2	-4682	ALU-REF_797	16	70553010	70553010	292	288.835	1.00001	1.91302	0.000345745	-0.278985	0.00059994	0.000712272	SF3B3	ALU	180.445
ENSG00000196263_ALU-NREF_2551	ENSG00000196263	19	57019213	57041590	+	2	0	ALU-NREF_2551	19	57023579	57023579	292	299.457	0.999994	2.02366	0.000154946	0.216567	0.00049995	0.000258172	ZNF471	ALU	3.01516
ENSG00000196460_ALU-REF_66	ENSG00000196460	2	102013824	102091165	-	2	-6674	ALU-REF_66	2	102097839	102097839	292	284.942	1.00002	1.99503	1.72885e-07	-0.466963	9.999e-05	4.85469e-07	RFX8	ALU	0.52348
ENSG00000196604_SVA-NREF_12	ENSG00000196604	2	130831109	130886795	-	2	-81694	SVA-NREF_12	2	130968489	130968489	292	298.316	1	2.01242	9.40284e-06	-0.330365	9.999e-05	1.51474e-05	POTEF	SVA	0.371004
ENSG00000196865_ALU-NREF_1744	ENSG00000196865	10	115614421	115676953	+	3	-566156	ALU-NREF_1744	10	115048265	115048265	292	287.637	1.00002	2.98675	0.00025668	0.237206	0.00089991	0.000852589	NHLRC2	ALU	11.0708
ENSG00000196911_ALU-NREF_1114	ENSG00000196911	6	117002351	117063029	+	4	-103665	ALU-NREF_1114	6	116898686	116898686	292	292.556	0.999976	3.46108	6.80486e-05	-0.266019	0.00029997	0.000231815	KPNA5	ALU	15.2677
ENSG00000196950_ALU-REF_91	ENSG00000196950	2	196440702	196602426	+	5	133986	ALU-REF_91	2	196736412	196736412	292	290.745	1.00001	4.82614	2.62456e-10	0.456866	9.999e-05	1.38291e-09	SLC39A10	ALU	94.4655
ENSG00000197563_ALU-NREF_2521	ENSG00000197563	18	59710801	59854351	-	5	0	ALU-NREF_2521	18	59713734	59713734	292	291.786	0.999991	5.03914	9.52634e-10	-0.433052	9.999e-05	4.86932e-09	PIGN	ALU	19.9612
ENSG00000198276_ALU-NREF_2584	ENSG00000198276	20	62571187	62587769	-	1	66773	ALU-NREF_2584	20	62504414	62504414	292	287.252	0.999991	0.991794	0.000517753	0.453235	0.00059994	0.000570589	UCKL1	ALU	22.5972
ENSG00000198467_ALU-REF_546	ENSG00000198467	9	35681990	35691017	-	1	-112080	ALU-REF_546	9	35803097	35803097	292	300.141	0.999991	0.999378	6.9631e-05	-0.226611	0.00019998	5.51094e-05	TPM2	ALU	138.573
ENSG00000198535_ALU-NREF_2318	ENSG00000198535	15	62359177	62363116	+	4	-40897	ALU-NREF_2318	15	62318280	62318280	292	298.544	1.00002	4.05089	2.40508e-08	0.372029	9.999e-05	6.79466e-08	C2CD4A	ALU	0.122757
ENSG00000198604_ALU-NREF_2201	ENSG00000198604	14	35221938	35344853	-	2	-87744	ALU-NREF_2201	14	35432597	35432597	292	300.327	1.00002	1.99976	0.000152105	0.260495	0.00059994	0.000244667	BAZ1A	ALU	20.4984
ENSG00000198774_ALU-NREF_2019	ENSG00000198774	12	86198332	86230348	-	3	-93114	ALU-NREF_2019	12	86323462	86323462	292	288.949	1.00001	2.84124	2.80302e-05	0.599112	9.999e-05	8.77097e-05	RASSF9	ALU	0.412213
ENSG00000198879_ALU-NREF_1624	ENSG00000198879	10	7200587	7453450	-	3	329232	ALU-NREF_1624	10	6871355	6871355	292	288.122	1.00001	2.98434	0.000195381	0.475887	0.00069993	0.000643113	SFMBT2	ALU	2.26929
ENSG00000198909_ALU-NREF_2455	ENSG00000198909	17	61699776	61778532	+	2	0	ALU-NREF_2455	17	61731693	61731693	292	284.942	0.999983	1.96964	3.12468e-06	-0.469542	9.999e-05	8.09992e-06	MAP3K3	ALU	11.6827
ENSG00000203805_ALU-NREF_1749	ENSG00000203805	10	122216467	122349367	+	2	879617	ALU-NREF_1749	10	123228984	123228984	292	324.337	0.999999	2.01417	4.31643e-05	0.249029	0.00219978	3.2773e-05	PPAPDC1A	ALU	0.280468
ENSG00000204982_ALU-NREF_1528	ENSG00000204982	9	33613847	33614007	-	1	-86127	ALU-NREF_1528	9	33700134	33700134	292	302.294	0.999998	1.01852	0.000561767	0.388528	0.00039996	0.000456735	PRSS3P4	ALU	1.66614
ENSG00000213281_ALU-NREF_104	ENSG00000213281	1	115247091	115259515	-	2	45690	ALU-NREF_104	1	115201401	115201401	292	295.65	0.999996	1.96772	5.74125e-06	0.311648	0.00019998	9.87562e-06	NRAS	ALU	78.2217
ENSG00000213642_ALU-NREF_1243	ENSG00000213642	7	64029807	64030815	-	1	149611	ALU-NREF_1243	7	63880196	63880196	292	296.976	1.00001	1.01487	0.00117839	0.309628	0.00119988	0.00108509	RP11-561N12.5	ALU	0.133718
ENSG00000216937_ALU-NREF_1647	ENSG00000216937	10	32735069	33171802	+	2	-60991	ALU-NREF_1647	10	32674078	32674078	292	289.876	1.00002	1.99152	3.41743e-05	0.491687	9.999e-05	7.26811e-05	CCDC7	ALU	0.829124
ENSG00000219932_L1-NREF_199	ENSG00000219932	10	69634091	69634672	+	3	-830395	L1-NREF_199	10	68803696	68803696	292	301.995	1.00002	3.06728	0.000220659	0.505137	0.00149985	0.00052749	RPL12P8	L1	0.106032
ENSG00000223760_SVA-NREF_12	ENSG00000223760	2	130887195	130902707	+	2	65782	SVA-NREF_12	2	130968489	130968489	292	293.44	1	1.97823	0.000207655	-0.272908	0.00049995	0.000396151	MED15P9	SVA	0.670819
ENSG00000224172_ALU-NREF_1243	ENSG00000224172	7	64196312	64197121	-	1	316116	ALU-NREF_1243	7	63880196	63880196	292	296.42	0.999996	1.00611	0.000531081	0.338529	0.00049995	0.000484648	RP11-416N13.1	ALU	0.0569673
ENSG00000224669_ALU-NREF_1243	ENSG00000224669	7	64043112	64043585	+	1	-162916	ALU-NREF_1243	7	63880196	63880196	292	298.288	0.999999	1.00574	1.44827e-09	0.537876	9.999e-05	9.71611e-10	RP11-561N12.1	ALU	0.940596
ENSG00000225492_ALU-NREF_80	ENSG00000225492	1	89873239	89891802	+	1	478767	ALU-NREF_80	1	90370569	90370569	292	295.736	0.999996	1.00837	0.000232924	0.119878	0.00029997	0.00021414	GBP1P1	ALU	0.897417
ENSG00000226468_ALU-NREF_1204	ENSG00000226468	7	32496576	32497370	-	5	-333871	ALU-NREF_1204	7	32831241	32831241	292	285.156	1.00001	4.52555	2.76222e-05	0.453432	0.00469953	0.000155289	AC018641.7	ALU	1.23491
ENSG00000227692_ALU-NREF_382	ENSG00000227692	2	187229326	187229855	+	2	-20331	ALU-NREF_382	2	187208995	187208995	292	291.914	0.99998	1.99353	0.000381405	-0.399059	0.00069993	0.000761819	MED28P3	ALU	0.421322
ENSG00000230445_ALU-NREF_1641	ENSG00000230445	10	27535280	27577753	-	3	494920	ALU-NREF_1641	10	27040360	27040360	292	290.603	1.00001	3.01221	0.000128371	0.505354	0.00039996	0.000401285	LRRC37A6P	ALU	0.790861
ENSG00000230873_L1-NREF_127	ENSG00000230873	6	17102490	17131603	+	4	-151534	L1-NREF_127	6	16950956	16950956	292	295.194	1	3.88263	8.16647e-05	-0.160599	0.00069993	0.000289771	STMND1	L1	0.640282
ENSG00000231165_ALU-NREF_1528	ENSG00000231165	9	33695766	33696057	+	1	4077	ALU-NREF_1528	9	33700134	33700134	292	284.401	0.999981	0.976699	8.06641e-11	0.695871	9.999e-05	1.38434e-10	TRBV26OR9-2	ALU	2.71663
ENSG00000234020_SVA-NREF_6	ENSG00000234020	1	111895898	111910031	-	4	0	SVA-NREF_6	1	111896187	111896187	292	303.805	0.999975	3.94683	1.16401e-09	-0.470559	9.999e-05	2.13098e-09	CHIAP3	SVA	0.122266
ENSG00000234231_L1-NREF_23	ENSG00000234231	2	88000504	88038766	+	4	-592802	L1-NREF_23	2	87407702	87407702	292	294.481	0.999975	4.04049	2.7614e-05	0.387784	9.999e-05	0.000103157	AC093616.4	L1	14.1609
ENSG00000234444_ALU-NREF_1243	ENSG00000234444	7	63767838	63815238	+	1	64958	ALU-NREF_1243	7	63880196	63880196	292	278.94	0.999981	0.991669	5.72488e-06	0.407069	9.999e-05	9.19546e-06	ZNF736	ALU	4.93248
ENSG00000235574_ALU-REF_411	ENSG00000235574	7	27531302	27532384	-	1	16966	ALU-REF_411	7	27514336	27514336	292	284.429	1.00001	1.02104	0.0004767	0.265685	0.00059994	0.000576883	AC073150.6	ALU	0.0302745
ENSG00000240771_ALU-NREF_1981	ENSG00000240771	12	58003964	58013162	+	3	70116	ALU-NREF_1981	12	58083278	58083278	292	306.586	1.00002	2.2872	2.14193e-05	0.443338	9.999e-05	3.0488e-05	ARHGEF25	ALU	7.96826
ENSG00000243566_ALU-NREF_1248	ENSG00000243566	7	76139746	76673093	+	3	0	ALU-NREF_1248	7	76456343	76456343	292	300.683	1.00001	2.9486	0.000132944	-0.413703	0.00069993	0.000311202	UPK3B	ALU	2.01306
ENSG00000244004_SVA-NREF_36	ENSG00000244004	4	9564792	9565570	+	1	139276	SVA-NREF_36	4	9704846	9704846	292	283.602	1	0.964122	0.000180595	0.105434	0.00029997	0.000215882	RP11-1396O13.2	SVA	0.14992
ENSG00000244723_ALU-NREF_2629	ENSG00000244723	22	23991401	23995521	-	1	118719	ALU-NREF_2629	22	23872682	23872682	292	309.566	1.00001	1.03116	0.000342635	-0.156562	0.00019998	0.000233926	ASLP1	ALU	1.61748
ENSG00000245958_ALU-NREF_709	ENSG00000245958	4	120375947	120550146	+	5	89758	ALU-NREF_709	4	120639904	120639904	292	294.139	0.999979	4.92131	1.37979e-05	0.31484	0.00019998	6.31558e-05	RP11-33B1.1	ALU	25.6381
ENSG00000248511_ALU-NREF_687	ENSG00000248511	4	93218403	93225329	-	2	-137965	ALU-NREF_687	4	93363294	93363294	292	312.916	1	1.81868	9.81538e-10	-0.528974	9.999e-05	4.52045e-10	RP11-9B6.1	ALU	2.38444
ENSG00000248746_SVA-NREF_81	ENSG00000248746	11	66313867	66330800	+	3	-151753	SVA-NREF_81	11	66162114	66162114	292	293.611	1.00002	2.97914	9.04562e-07	-0.377535	9.999e-05	2.51392e-06	ACTN3	SVA	17.9399
ENSG00000250342_SVA-NREF_36	ENSG00000250342	4	9053569	9053777	-	1	-651069	SVA-NREF_36	4	9704846	9704846	292	286.896	1	1.00485	0.000296617	-0.253866	0.00039996	0.00033687	RP11-747H12.6	SVA	0.71872
ENSG00000251689_ALU-NREF_614	ENSG00000251689	4	263656	263964	-	3	7884	ALU-NREF_614	4	255772	255772	292	301.809	1	2.70607	1.08174e-13	0.673479	9.999e-05	1.13781e-13	RP11-478C6.5	ALU	7.03711
ENSG00000253426_ALU-NREF_1333	ENSG00000253426	8	9009253	9025646	+	4	0	ALU-NREF_1333	8	9012966	9012966	292	304.148	1.00001	3.64032	8.355e-05	0.355803	0.00069993	0.000216265	RP11-10A14.4	ALU	2.57803
ENSG00000255185_ALU-REF_797	ENSG00000255185	16	70044655	70099848	-	2	-453162	ALU-REF_797	16	70553010	70553010	292	287.366	1.00002	1.99722	4.28852e-06	-0.309981	9.999e-05	1.02045e-05	PDXDC2P	ALU	11.1674
ENSG00000255468_SVA-NREF_81	ENSG00000255468	11	66115422	66139685	+	3	22429	SVA-NREF_81	11	66162114	66162114	292	289.248	0.999997	2.97076	4.8796e-05	0.18165	0.00039996	0.000157368	RP11-867G23.8	SVA	8.90304
ENSG00000257327_ALU-REF_684	ENSG00000257327	12	104235230	104359486	+	1	0	ALU-REF_684	12	104293396	104293396	292	293.112	0.999988	0.998976	4.47705e-08	0.580753	9.999e-05	4.21754e-08	RP11-650K20.3	ALU	0.567894
ENSG00000258053_ALU-NREF_2002	ENSG00000258053	12	71441183	71512027	-	2	-13452	ALU-NREF_2002	12	71525479	71525479	292	290.588	0.999986	2.01433	3.37095e-21	0.724429	9.999e-05	8.45464e-21	CTD-2021H9.3	ALU	4.41289
ENSG00000261011_ALU-REF_598	ENSG00000261011	10	88761394	88769662	+	4	-95217	ALU-REF_598	10	88666177	88666177	292	286.839	1.00002	3.8268	5.1697e-06	0.328602	0.00019998	2.39692e-05	RP11-96C23.11	ALU	0.547429
ENSG00000261599_ALU-NREF_2382	ENSG00000261599	16	33105526	33140411	-	2	-327298	ALU-NREF_2382	16	33467709	33467709	292	292.97	0.999991	1.98907	3.44738e-05	-0.251832	0.00019998	6.65464e-05	HERC2P8	ALU	2.2392
ENSG00000263369_ALU-NREF_2424	ENSG00000263369	17	30433350	30441144	-	3	590859	ALU-NREF_2424	17	29842491	29842491	292	289.391	0.99998	2.94575	0.000320018	0.255923	0.00109989	0.00100273	RP11-640N20.9	ALU	1.72219
ENSG00000270802_ALU-NREF_2538	ENSG00000270802	19	15449760	15450048	+	1	477904	ALU-NREF_2538	19	15927952	15927952	292	286.625	0.999984	0.998095	0.000701422	-0.120621	0.0009999	0.00078473	AC005776.1	ALU	0.649565

## Sheet: TOP-SNP.pMEI-iPSC
gene	Chr_gene	Start_gene	End_gene	strand	variants_tested	dist_Gene	MEI	Chr_MEI	Pos_MEI	Pos_MEI2	rank (0 = best)	Forward nominal P-value	Forward slope	Top variant ? (1 = true)	< P-value threshold ? (1 = True)	Backward nominal P-value	Backward slope	Top variant ? (1 = true)	< P-value threshold ? (1 = True)
ENSG00000120937	1	11917522	11918988	-	1	-818587	ALU-NREF_7	1	12737575	12737575	0	0.0250078	0.433619	1	1	1.55069e-08	-1.11404	1	1
ENSG00000101638	18	44259082	44339220	-	4858	0	ALU-REF_829	18	44338418	44338418	0	2.25658e-07	-0.429427	1	1	2.25658e-07	-0.429427	1	1
ENSG00000162869	2	48667738	48742525	+	3	-391204	ALU-NREF_266	2	48276534	48276534	0	0.000416671	0.365363	1	1	0.000416671	0.365363	1	1
ENSG00000198276	20	62571187	62587769	-	1	66773	ALU-NREF_2584	20	62504414	62504414	0	0.00228616	0.501646	1	1	0.00228616	0.501646	1	1
ENSG00000251689	4	263656	263964	-	3094	7884	ALU-NREF_614	4	255772	255772	0	8.53841e-12	0.760307	1	1	8.53841e-12	0.760307	1	1
ENSG00000250342	4	9053569	9053777	-	1	-651069	SVA-NREF_36	4	9704846	9704846	0	0.00184611	-0.274955	1	1	0.00184611	-0.274955	1	1
ENSG00000138744	4	76831810	76912115	-	2	-81709	ALU-NREF_668	4	76993824	76993824	0	0.000662805	-0.52482	1	1	0.000662805	-0.52482	1	1
ENSG00000214062	4	78003557	78004279	-	2	-231996	L1-REF_29	4	78236275	78236275	0	0.000742779	0.328475	1	1	0.000742779	0.328475	1	1
ENSG00000204590	6	30509155	30531500	-	3	690283	ALU-NREF_982	6	29818872	29818872	0	0.000329829	0.405727	1	1	0.000329829	0.405727	1	1
ENSG00000137343	6	30594620	30614600	+	3	-775748	ALU-NREF_982	6	29818872	29818872	0	1.32501e-06	0.5093	1	1	1.32501e-06	0.5093	1	1
ENSG00000196230	6	30687979	30693203	+	3	-869107	ALU-NREF_982	6	29818872	29818872	0	3.0237e-05	0.480368	1	1	3.0237e-05	0.480368	1	1
ENSG00000137310	6	31126320	31148508	+	2	290508	ALU-NREF_990	6	31439016	31439016	0	0.000165686	-0.425814	1	1	0.000165686	-0.425814	1	1
ENSG00000204516	6	31462659	31478901	+	3	834868	ALU-REF_352	6	32313769	32313769	0	0.000612935	0.418414	1	1	0.000612935	0.418414	1	1
ENSG00000204469	6	31588498	31605548	+	5	708221	ALU-REF_352	6	32313769	32313769	0	5.79003e-12	0.809878	1	1	1.66205e-10	0.793023	1	1
ENSG00000204463	6	31606806	31625987	-	5	-687782	ALU-REF_352	6	32313769	32313769	0	3.0454e-06	0.583661	1	1	3.0454e-06	0.583661	1	1
ENSG00000204438	6	31629007	31641553	-	5	-672216	ALU-REF_352	6	32313769	32313769	0	2.6273e-05	0.490879	1	1	2.6273e-05	0.490879	1	1
ENSG00000204427	6	31654727	31685695	-	6	-628074	ALU-REF_352	6	32313769	32313769	0	6.34699e-05	0.504801	1	1	6.34699e-05	0.504801	1	1
ENSG00000213722	6	31694816	31707540	-	7	-606229	ALU-REF_352	6	32313769	32313769	0	1.50808e-14	0.886272	1	1	2.23024e-13	0.89514	1	1
ENSG00000204394	6	31745296	31763730	-	9	-944266	ALU-NREF_994	6	32707996	32707996	0	8.15916e-07	0.704768	1	1	8.15916e-07	0.704768	1	1
ENSG00000204385	6	31830970	31846823	-	10	391954	ALU-NREF_990	6	31439016	31439016	0	1.47397e-05	-0.493266	1	1	1.49671e-06	-0.564548	1	1
ENSG00000204371	6	31847537	31865464	-	10	-842532	ALU-NREF_994	6	32707996	32707996	0	2.17975e-08	0.811195	1	1	5.24665e-08	0.804999	1	1
ENSG00000204308	6	32146132	32152101	+	12	555895	ALU-NREF_994	6	32707996	32707996	0	2.99882e-07	-0.678538	1	1	2.99882e-07	-0.678538	1	1
ENSG00000204304	6	32152513	32157963	-	12	-155806	ALU-REF_352	6	32313769	32313769	0	9.66384e-11	0.769697	1	1	9.66384e-11	0.769697	1	1
ENSG00000229391	6	32520491	32527799	-	10	-62035	ALU-NREF_991	6	32589834	32589834	0	6.96831e-06	0.669442	1	1	6.96831e-06	0.669442	1	1
ENSG00000196126	6	32546547	32557625	-	10	-13706	ALU-REF_353	6	32571331	32571331	0	1.04326e-20	0.693583	1	1	9.71154e-21	0.731198	1	1
ENSG00000196735	6	32595957	32614839	+	10	-24626	ALU-REF_353	6	32571331	32571331	0	3.93428e-05	0.340939	1	1	6.3696e-11	0.541385	1	1
ENSG00000241106	6	32780541	32806599	-	10	31310	ALU-REF_354	6	32749231	32749231	0	1.59441e-16	0.858729	1	1	1.59441e-16	0.858729	1	1
ENSG00000204252	6	32971956	32977389	-	11	-116019	ALU-REF_355	6	33093408	33093408	0	9.26644e-07	0.492045	1	1	9.26644e-07	0.492045	1	1
ENSG00000231389	6	33032347	33054978	-	11	2037	SVA-NREF_62	6	33030310	33030310	0	5.76925e-10	-0.797055	1	1	1.08302e-12	-0.951398	1	1
ENSG00000224557	6	33080229	33111102	+	11	0	ALU-REF_355	6	33093408	33093408	0	2.3085e-63	1.13846	1	1	2.3085e-63	1.13846	1	1
ENSG00000204248	6	33130459	33160276	-	11	37051	ALU-REF_355	6	33093408	33093408	0	1.37263e-16	0.772308	1	1	1.37263e-16	0.772308	1	1
ENSG00000204231	6	33161366	33172216	-	11	67958	ALU-REF_355	6	33093408	33093408	0	9.16136e-13	0.697754	1	1	9.16136e-13	0.697754	1	1
ENSG00000223501	6	33218050	33244287	-	11	124642	ALU-REF_355	6	33093408	33093408	0	1.58617e-05	0.423226	1	1	1.58617e-05	0.423226	1	1
ENSG00000197283	6	33387848	33421466	+	10	-357538	SVA-NREF_62	6	33030310	33030310	0	7.56542e-05	-0.509901	1	1	7.56542e-05	-0.509901	1	1
ENSG00000095777	10	26223197	26501456	+	7	0	ALU-NREF_1640	10	26225949	26225949	0	0.000263514	-0.543708	1	1	0.000263514	-0.543708	1	1
ENSG00000012779	10	45869662	45941561	+	1	133327	ALU-NREF_1661	10	46074888	46074888	0	0.00159805	0.668984	1	1	0.00159805	0.668984	1	1
ENSG00000148602	10	85991350	86001217	-	2	8091	ALU-NREF_1708	10	85983259	85983259	0	0.000613223	0.398001	1	1	0.000613223	0.398001	1	1
ENSG00000119977	10	97423159	97453900	-	2	-214638	ALU-NREF_1724	10	97668538	97668538	0	0.00106941	0.325897	1	1	0.00106941	0.325897	1	1
ENSG00000065618	10	105791045	105845760	-	5	982684	ALU-NREF_1726	10	104808361	104808361	0	0.000311563	0.6904	1	1	0.000311563	0.6904	1	1
ENSG00000215018	7	7395835	7575484	-	2	0	ALU-REF_406	7	7542310	7542310	0	0.000869462	-0.165166	1	1	0.000869462	-0.165166	1	1
ENSG00000226468	7	32496576	32497370	-	3	-333871	ALU-NREF_1204	7	32831241	32831241	0	0.00068518	0.457583	1	1	0.00068518	0.457583	1	1
ENSG00000178460	8	67782985	67834283	+	1	893038	ALU-REF_495	8	68727321	68727321	0	0.00175565	-0.259058	1	1	0.00175565	-0.259058	1	1
ENSG00000213281	1	115247091	115259515	-	2	45690	ALU-NREF_104	1	115201401	115201401	0	0.000862151	0.281026	1	1	0.000862151	0.281026	1	1
ENSG00000231360	1	144339739	144521058	+	533	429968	ALU-NREF_111	1	144951026	144951026	0	3.34057e-18	1.18721	1	1	1.09722e-15	1.19165	1	1
ENSG00000177855	2	184472171	184472847	-	1	-652771	ALU-NREF_378	2	185125618	185125618	0	0.00134814	-0.548055	1	1	0.00134814	-0.548055	1	1
ENSG00000155749	2	202152995	202222121	-	3	514910	L1-NREF_35	2	201638085	201638085	0	0.000407881	-0.378429	1	1	0.000407881	-0.378429	1	1
ENSG00000225190	17	43513267	43568115	-	3	-655793	ALU-REF_810	17	44223908	44223908	0	4.53112e-22	0.914896	1	1	4.53112e-22	0.914896	1	1
ENSG00000214425	17	43578686	43627701	-	3	-548694	ALU-REF_809	17	44176395	44176395	0	1.19153e-50	1.24268	1	1	1.19153e-50	1.24268	1	1
ENSG00000264070	17	43663238	43664295	+	3	512100	ALU-REF_809	17	44176395	44176395	0	1.64828e-22	0.879447	1	1	1.64828e-22	0.879447	1	1
ENSG00000186868	17	43971749	44105700	+	3	70695	ALU-REF_809	17	44176395	44176395	0	7.82028e-22	0.914739	1	1	7.82028e-22	0.914739	1	1
ENSG00000120071	17	44107283	44302733	-	3	0	ALU-REF_810	17	44223908	44223908	0	5.9479e-22	-0.933339	1	1	5.9479e-22	-0.933339	1	1
ENSG00000262500	17	44320973	44322410	+	3	-660362	SVA-NREF_97	17	43660611	43660611	0	0.00045957	-0.597308	1	1	0.00045957	-0.597308	1	1
ENSG00000262539	17	44336918	44337972	-	3	113010	ALU-REF_810	17	44223908	44223908	0	2.86995e-40	-1.2221	1	1	2.86995e-40	-1.2221	1	1
ENSG00000261575	17	44344404	44346060	+	3	-168009	ALU-REF_809	17	44176395	44176395	0	3.65343e-13	-0.760063	1	1	3.65343e-13	-0.760063	1	1
ENSG00000228696	17	44352151	44439130	-	3	128243	ALU-REF_810	17	44223908	44223908	0	1.39043e-05	0.456506	1	1	1.39043e-05	0.456506	1	1
ENSG00000238083	17	44588878	44657088	+	3	-364970	ALU-REF_810	17	44223908	44223908	0	1.21751e-06	0.455171	1	1	1.21751e-06	0.455171	1	1
ENSG00000073969	17	44668036	44834830	+	2	-491641	ALU-REF_809	17	44176395	44176395	0	4.56985e-12	-0.660928	1	1	4.56985e-12	-0.660928	1	1
ENSG00000158955	17	44910568	44964096	+	2	-734173	ALU-REF_809	17	44176395	44176395	0	0.00201599	-0.15387	1	1	0.00201599	-0.15387	1	1
ENSG00000175581	11	73498362	73576178	+	2	0	ALU-NREF_1843	11	73562793	73562793	0	0.000891489	0.603209	1	1	0.000891489	0.603209	1	1
ENSG00000165325	11	93063138	93171653	+	2	0	ALU-REF_644	11	93102801	93102801	0	0.000709808	0.420818	1	1	0.000709808	0.420818	1	1
ENSG00000137727	11	110447767	110583912	-	2	170829	ALU-NREF_1881	11	110276938	110276938	0	0.00144995	0.511881	1	1	0.000144857	-0.621225	1	1
ENSG00000168827	3	158362068	158410364	+	3	-399139	ALU-NREF_569	3	157962929	157962929	0	0.000521037	-0.429858	1	1	0.000521037	-0.429858	1	1
ENSG00000169976	6	144416019	144416754	-	2	233055	ALU-NREF_1162	6	144182964	144182964	0	0.000661677	0.380241	1	1	0.000661677	0.380241	1	1
ENSG00000175104	11	36508578	36531822	-	2	-26668	L1-NREF_206	11	36558490	36558490	0	0.000798237	0.49679	1	1	0.000798237	0.49679	1	1
ENSG00000149084	11	43577987	43878167	+	5997	0	ALU-NREF_1825	11	43877448	43877448	0	3.52497e-15	-0.626363	1	1	3.52497e-15	-0.626363	1	1
ENSG00000214880	11	55746180	55753881	-	5	-17451	ALU-NREF_1831	11	55771332	55771332	0	0.00063576	-0.649583	1	1	0.00063576	-0.649583	1	1
ENSG00000162783	1	181057639	181059977	+	1	-764649	ALU-REF_23	1	180292990	180292990	0	0.00212194	0.629573	1	1	0.00212194	0.629573	1	1
ENSG00000256657	12	11348988	11349908	-	5726	169950	ALU-NREF_1910	12	11179038	11179038	0	7.94059e-08	0.659358	1	1	7.94059e-08	0.659358	1	1
ENSG00000136160	13	78469617	78493903	-	2	-90768	ALU-NREF_2137	13	78584671	78584671	0	0.00122155	0.325679	1	1	0.00122155	0.325679	1	1
ENSG00000139800	13	100615219	100624163	-	2	850210	ALU-NREF_2176	13	99765009	99765009	0	0.000738577	0.357253	1	1	0.000738577	0.357253	1	1
ENSG00000157379	14	24759805	24769039	-	1	-25389	ALU-NREF_2193	14	24794428	24794428	0	0.0010492	0.619789	1	1	0.0010492	0.619789	1	1
ENSG00000126775	14	55833111	55878576	-	3	37240	ALU-NREF_2224	14	55795871	55795871	0	0.000506433	-0.232334	1	1	0.000506433	-0.232334	1	1
ENSG00000104112	15	51973551	52013223	+	3	-75849	ALU-REF_773	15	51897702	51897702	0	0.000652521	-0.307456	1	1	0.000652521	-0.307456	1	1
ENSG00000103356	16	23533336	23585710	-	4532	4800	ALU-REF_785	16	23528536	23528536	0	1.214e-13	-0.807383	1	1	1.214e-13	-0.807383	1	1
ENSG00000261599	16	33105526	33140411	-	2	-327298	ALU-NREF_2382	16	33467709	33467709	0	0.000527982	-0.322111	1	1	0.000527982	-0.322111	1	1
ENSG00000141750	17	37366790	37382125	-	1	615895	ALU-NREF_2433	17	36750895	36750895	0	0.00121751	-0.685231	1	1	0.00121751	-0.685231	1	1

## Sheet: shared.TE-eQTL.0.05FDR+Bonef.
pMEI-eQTL											LCL									iPSC
pMEI-eQTL	gene	Chr_gene	Start_gene	End_gene	strand	dist_Gene	MEI	Chr_MEI	Pos_MEI	Pos_MEI2	df	dummy	Beta1	Beta2	P_nominal	slope	P_empirical	P_value	Gene_name	df	dummy	Beta1	Beta2	P_nominal	slope	P_empirical	P_value	Gene_name	mei
ENSG00000011376_ALU-NREF_485	ENSG00000011376	3	45429999	45590913	+	3	ALU-NREF_485	3	45542662	45542662	442	450.6	0.999996	3.01478	5.46955e-09	0.206108	9.999e-05	1.17323e-08	LARS2	186	190.414	1.00002	2.97645	4.95892e-11	0.551142	9.999e-05	8.7265e-11	LARS2	ALU
ENSG00000070718_ALU-NREF_1372	ENSG00000070718	8	42010465	42029191	+	3	ALU-NREF_1372	8	42039906	42039906	442	451.982	1.00001	2.94491	5.93339e-06	0.255901	0.00019998	1.37142e-05	AP3M2	186	192.775	1.00001	2.80579	1.62128e-07	0.712751	9.999e-05	2.70976e-07	AP3M2	ALU
ENSG00000101638_ALU-REF_829	ENSG00000101638	18	44259082	44339220	-	4	ALU-REF_829	18	44338418	44338418	442	445.561	1.00001	3.96342	3.35259e-13	0.421023	9.999e-05	1.06863e-12	ST8SIA5	186	191.776	0.999981	3.91977	2.25658e-07	-0.429427	9.999e-05	5.74634e-07	ST8SIA5	ALU
ENSG00000103356_ALU-REF_785	ENSG00000103356	16	23533336	23585710	-	3	ALU-REF_785	16	23528536	23528536	442	448.982	0.999998	2.99959	4.789e-11	-0.411912	9.999e-05	1.01276e-10	EARS2	186	186.327	0.999961	2.98331	1.214e-13	-0.807383	9.999e-05	3.45134e-13	EARS2	ALU
ENSG00000104341_ALU-REF_507	ENSG00000104341	8	98787286	98865241	+	2	ALU-REF_507	8	98783449	98783449	442	446.5	0.999998	1.99705	0.000221694	0.218013	0.0009999	0.000411117	LAPTM4B	186	188.071	0.999956	2.03416	2.59889e-05	0.357218	9.999e-05	4.76746e-05	LAPTM4B	ALU
ENSG00000108592_ALU-NREF_2455	ENSG00000108592	17	61896794	61909379	-	2	ALU-NREF_2455	17	61731693	61731693	442	443.09	0.99999	1.98937	1.11393e-11	0.338605	9.999e-05	2.09142e-11	FTSJ3	186	186.036	0.999968	2.00329	4.50821e-07	0.662833	9.999e-05	9.01206e-07	FTSJ3	ALU
ENSG00000111215_ALU-REF_660	ENSG00000111215	12	10977560	11324212	-	4	ALU-REF_660	12	11258525	11258525	442	450.514	1.00001	3.85802	2.9596e-49	0.68802	9.999e-05	1.38619e-49	PRR4	186	188.198	0.999952	3.91536	4.7073e-22	0.765336	9.999e-05	1.0575e-21	PRR4	ALU
ENSG00000115274_ALU-REF_54	ENSG00000115274	2	74682151	74688018	+	3	ALU-REF_54	2	74511277	74511277	442	454.755	1.00001	2.96636	4.25041e-06	0.193948	9.999e-05	9.1667e-06	INO80B	186	189.379	1.00005	3.02949	8.4456e-05	0.406363	0.00059994	0.000220364	INO80B	ALU
ENSG00000115750_ALU-REF_36	ENSG00000115750	2	9983484	10074545	+	2	ALU-REF_36	2	9959222	9959222	442	438.752	1	2.05881	2.31682e-15	-0.336508	9.999e-05	6.02949e-15	TAF1B	186	189.379	0.999979	2.00918	1.75961e-10	-0.458869	9.999e-05	2.4203e-10	TAF1B	ALU
ENSG00000119684_ALU-NREF_2254	ENSG00000119684	14	75480468	75518235	-	2	ALU-NREF_2254	14	75499581	75499581	442	439.011	1.00001	1.95003	9.9208e-12	0.303783	9.999e-05	2.27005e-11	MLH3	186	184.656	1	1.96387	4.30226e-14	0.601545	9.999e-05	1.04241e-13	MLH3	ALU
ENSG00000119718_ALU-NREF_2254	ENSG00000119718	14	75469615	75476292	+	2	ALU-NREF_2254	14	75499581	75499581	442	445.291	0.999997	2.00546	1.00626e-26	0.446388	9.999e-05	1.31238e-26	EIF2B2	186	185.746	0.999962	1.99167	1.06975e-09	0.387563	9.999e-05	2.18868e-09	EIF2B2	ALU
ENSG00000125885_ALU-REF_853	ENSG00000125885	20	5931299	5975852	+	3	ALU-REF_853	20	5942988	5942988	442	437.457	1	2.85524	1.40936e-11	0.288431	9.999e-05	5.11457e-11	MCM8	186	186.981	0.999971	3.01057	4.40311e-31	0.904584	9.999e-05	9.28627e-31	MCM8	ALU
ENSG00000128039_ALU-NREF_640	ENSG00000128039	4	56212277	56239263	+	4	ALU-NREF_640	4	56371962	56371962	442	435.558	0.999991	3.97219	2.13443e-13	0.40706	9.999e-05	1.26535e-12	SRD5A3	186	187.235	1.00002	3.99847	1.28095e-06	0.632555	9.999e-05	4.72129e-06	SRD5A3	ALU
ENSG00000128891_ALU-NREF_2296	ENSG00000128891	15	40820883	40857256	-	2	ALU-NREF_2296	15	41100332	41100332	442	450.924	1	2.02264	6.8557e-06	0.274695	9.999e-05	1.11984e-05	C15orf57	186	190.959	1.00001	2.04072	1.23476e-15	0.710056	9.999e-05	1.05711e-15	C15orf57	ALU
ENSG00000135951_ALU-REF_64	ENSG00000135951	2	99613725	100106497	-	1	ALU-REF_64	2	99752965	99752965	442	449.942	0.999993	1.00391	2.35416e-11	-0.390972	9.999e-05	1.56845e-11	TSGA10	186	186.254	0.999969	1.00074	1.44414e-07	-0.420798	9.999e-05	1.41784e-07	TSGA10	ALU
ENSG00000137054_ALU-NREF_1531	ENSG00000137054	9	37485933	37503694	+	2	ALU-NREF_1531	9	37596348	37596348	442	454.129	1.00001	1.99115	6.5206e-11	-0.42043	9.999e-05	7.13191e-11	POLR1E	186	186.654	0.999969	1.97179	1.24713e-07	-0.515589	9.999e-05	2.33814e-07	POLR1E	ALU
ENSG00000138346_ALU-REF_593	ENSG00000138346	10	70173822	70231879	-	4	ALU-REF_593	10	70272097	70272097	442	443.122	0.999999	3.90413	1.15361e-16	0.530681	9.999e-05	4.12246e-16	DNA2	186	186.345	1	2.97616	7.06476e-08	0.535942	9.999e-05	2.0446e-07	DNA2	ALU
ENSG00000146733_ALU-NREF_1234	ENSG00000146733	7	56078745	56119297	-	4	ALU-NREF_1234	7	55851357	55851357	442	439.917	1	3.91918	5.05485e-20	0.555196	9.999e-05	2.42008e-19	PSPH	186	186.817	0.999979	3.98346	2.17525e-08	0.800991	9.999e-05	8.07312e-08	PSPH	ALU
ENSG00000149084_ALU-NREF_1825	ENSG00000149084	11	43577987	43878167	+	4	ALU-NREF_1825	11	43877448	43877448	442	447.147	1	4.05043	3.50087e-56	-0.86266	9.999e-05	3.29433e-56	HSD17B12	186	184.692	1.00004	3.95957	3.52497e-15	-0.626363	9.999e-05	1.7399e-14	HSD17B12	ALU
ENSG00000152348_ALU-REF_284	ENSG00000152348	5	81267845	81574396	+	5	ALU-REF_284	5	81182480	81182480	442	468.578	0.999998	5.41247	0.000127375	0.220099	0.00039996	0.000431629	ATG10	186	187.362	0.999957	5.05527	2.21211e-08	0.538548	9.999e-05	9.94135e-08	ATG10	ALU
ENSG00000156253_ALU-REF_881	ENSG00000156253	21	30376706	30391699	-	1	ALU-REF_881	21	30601817	30601817	442	448.669	1.00001	1.01787	3.56479e-05	0.27598	9.999e-05	3.16728e-05	RWDD2B	186	186.672	0.999969	1.0036	4.16489e-10	0.910426	9.999e-05	3.89042e-10	RWDD2B	ALU
ENSG00000159479_ALU-REF_6	ENSG00000159479	1	43849589	43855479	-	2	ALU-REF_6	1	43857456	43857456	442	453.849	1	2.00319	3.96533e-06	0.24241	9.999e-05	5.89747e-06	MED8	186	187.671	0.999956	1.97107	7.758e-09	0.499357	9.999e-05	1.31144e-08	MED8	ALU
ENSG00000162616_ALU-NREF_67	ENSG00000162616	1	78444860	78604133	+	7	ALU-NREF_67	1	78607067	78607067	442	441.148	1	6.58512	5.85467e-06	0.219921	0.00019998	3.93592e-05	DNAJB4	186	182.186	0.997319	6.19062	5.17809e-25	0.850903	9.999e-05	1.11895e-23	DNAJB4	ALU
ENSG00000168032_ALU-NREF_481	ENSG00000168032	3	40428648	40470110	+	1	ALU-NREF_481	3	40241622	40241622	442	430.486	1	0.991864	0.000152697	0.232939	0.00039996	0.000184758	ENTPD3	186	186.054	1	1.00503	7.03528e-06	0.463	9.999e-05	7.04855e-06	ENTPD3	ALU
ENSG00000172785_ALU-NREF_1492	ENSG00000172785	9	121042	188979	-	2	ALU-NREF_1492	9	262463	262463	442	435.105	0.999999	1.97275	7.42565e-22	0.624338	9.999e-05	3.03542e-21	CBWD1	186	187.09	0.99998	2.01127	2.89703e-11	0.940632	9.999e-05	5.10463e-11	CBWD1	ALU
ENSG00000174236_ALU-NREF_1936	ENSG00000174236	12	27849429	27850566	+	4	ALU-NREF_1936	12	27864811	27864811	442	448.788	1.00001	4.06877	1.04969e-05	-0.267833	0.00019998	3.65259e-05	REP15	186	192.43	1.00003	4.16112	1.01819e-05	-0.443194	9.999e-05	2.97498e-05	REP15	ALU
ENSG00000177873_ALU-NREF_481	ENSG00000177873	3	40518605	40531727	+	1	ALU-NREF_481	3	40241622	40241622	442	442.345	1.00001	1.01679	0.000304373	0.116185	0.00059994	0.000307779	ZNF619	186	186.708	0.999966	1.00734	7.36207e-05	0.375098	0.00019998	7.18685e-05	ZNF619	ALU
ENSG00000186322_ALU-REF_779	ENSG00000186322	15	82804004	82810874	+	3	ALU-REF_779	15	83773874	83773874	442	445.604	1	2.98555	3.22375e-05	-0.248607	0.00019998	8.93562e-05	GOLGA6L17P	186	188.706	1.00001	2.99323	3.33717e-08	-0.570284	9.999e-05	7.94005e-08	GOLGA6L17P	ALU
ENSG00000187987_ALU-REF_349	ENSG00000187987	6	28399708	28411279	-	3	ALU-REF_349	6	28190196	28190196	442	438.579	0.999998	2.99585	3.02577e-08	-0.237899	9.999e-05	1.02471e-07	ZSCAN23	186	187.635	0.999987	2.91272	2.25425e-06	-0.396627	9.999e-05	5.92664e-06	ZSCAN23	ALU
ENSG00000188732_ALU-NREF_1201	ENSG00000188732	7	23719750	23742868	+	3	ALU-NREF_1201	7	23665685	23665685	442	438.86	1.00001	2.93759	1.19137e-07	0.358422	9.999e-05	3.87925e-07	FAM221A	186	184.983	1.00003	2.98695	3.95024e-10	0.797846	9.999e-05	1.31618e-09	FAM221A	ALU
ENSG00000198270_ALU-NREF_2042	ENSG00000198270	12	112369087	112450970	-	1	ALU-NREF_2042	12	112777131	112777131	442	441.871	1.00001	1.01621	3.71872e-07	0.381043	9.999e-05	3.79356e-07	TMEM116	186	183.784	1.00003	0.987541	0.000135784	0.43048	0.00029997	0.000147027	TMEM116	ALU
ENSG00000198440_ALU-NREF_2548	ENSG00000198440	19	56909336	56947404	+	2	ALU-NREF_2548	19	56966061	56966061	442	454.032	1.00001	2.0535	7.42506e-06	0.256573	9.999e-05	1.1454e-05	ZNF583	186	191.94	0.999975	1.99989	3.50836e-07	0.448684	9.999e-05	4.56523e-07	ZNF583	ALU
ENSG00000205464_ALU-REF_284	ENSG00000205464	5	81575282	81682796	+	5	ALU-REF_284	5	81182480	81182480	442	436.939	0.999988	4.9233	4.71184e-05	0.18829	0.00039996	0.000256409	ATP6AP1L	186	187.054	1.00002	4.87382	2.8267e-05	0.385451	0.00019998	0.000130707	ATP6AP1L	ALU
ENSG00000205846_ALU-REF_658	ENSG00000205846	12	8608523	8630926	+	3	ALU-REF_658	12	8625579	8625579	442	513.178	0.999995	3.14468	0.000338199	0.24394	0.00939906	0.000353261	CLEC6A	186	183.294	1.00003	2.94571	2.75323e-05	-0.547147	0.00029997	9.27909e-05	CLEC6A	ALU
ENSG00000214078_ALU-NREF_2579	ENSG00000214078	20	34213954	34288906	-	2	ALU-NREF_2579	20	34458566	34458566	442	443.058	1	1.98908	1.63668e-36	-1.04585	9.999e-05	2.68706e-36	CPNE1	186	188.289	1.00001	1.97835	2.65171e-20	-1.47103	9.999e-05	3.08138e-20	CPNE1	ALU
ENSG00000216901_ALU-REF_349	ENSG00000216901	6	28143967	28144452	+	2	ALU-REF_349	6	28190196	28190196	442	440.273	0.999993	1.97982	5.21882e-14	-0.398078	9.999e-05	1.15669e-13	AL022393.7	186	190.396	1.00001	1.97447	7.37218e-18	-0.808713	9.999e-05	5.97823e-18	AL022393.7	ALU
ENSG00000226278_ALU-NREF_1234	ENSG00000226278	7	55832491	55840981	+	4	ALU-NREF_1234	7	55851357	55851357	442	440.867	0.999993	3.93534	7.12708e-14	0.429104	9.999e-05	3.01817e-13	PSPHP1	186	187.707	0.99995	3.9378	1.06929e-14	1.24864	9.999e-05	3.18902e-14	PSPHP1	ALU
ENSG00000227986_ALU-NREF_1243	ENSG00000227986	7	63815457	63816577	+	1	ALU-NREF_1243	7	63880180	63880180	442	441.406	0.999997	1.00575	5.61064e-07	0.350533	9.999e-05	5.74249e-07	TRIM60P18	186	187.617	0.999982	1.01319	0.000132466	0.362333	0.00039996	0.000125469	TRIM60P18	ALU
ENSG00000228653_ALU-NREF_1243	ENSG00000228653	7	63961204	63962107	+	1	ALU-NREF_1243	7	63880180	63880180	442	436.82	1	0.993309	1.45778e-05	0.327405	9.999e-05	1.62545e-05	HNRNPCP7	186	188.888	0.999969	0.999999	0.000282289	0.381512	0.00049995	0.000253078	HNRNPCP7	ALU
ENSG00000228716_ALU-REF_279	ENSG00000228716	5	79922048	80172279	-	3	ALU-REF_279	5	80039372	80039372	442	447.719	0.999991	3.00137	6.15703e-05	-0.216292	0.00019998	0.000165585	DHFR	186	184.038	1.00001	2.92635	3.77872e-12	-0.600913	9.999e-05	1.43403e-11	DHFR	ALU
ENSG00000229186_ALU-NREF_2042	ENSG00000229186	12	112337068	112340042	+	1	ALU-NREF_2042	12	112777131	112777131	442	438.288	0.999994	1.00305	0.000325659	-0.249154	0.00079992	0.000346185	ADAM1A	186	180.732	0.999979	0.983561	1.12253e-07	-0.817371	9.999e-05	1.66949e-07	ADAM1A	ALU
ENSG00000231360_ALU-NREF_111	ENSG00000231360	1	144339739	144521058	+	3	ALU-NREF_111	1	144951026	144951026	442	444.719	0.99999	3.02024	4.02122e-20	1.00174	9.999e-05	9.34115e-20	AL592284.1	186	186.945	0.999977	0.993788	3.34057e-18	1.18721	9.999e-05	2.73392e-18	AL592284.1	ALU
ENSG00000236624_ALU-REF_8	ENSG00000236624	1	45959539	45988719	-	2	ALU-REF_8	1	46366108	46366108	442	451.054	1	2.00591	5.31563e-12	0.399601	9.999e-05	6.48339e-12	CCDC163P	186	190.359	0.999958	1.93807	8.83094e-18	0.866024	9.999e-05	7.12566e-18	CCDC163P	ALU
ENSG00000256594_ALU-NREF_1906	ENSG00000256594	12	9787189	9811008	+	3	ALU-NREF_1906	12	9871162	9871162	442	452.856	0.999988	3.06862	8.96039e-11	0.374747	9.999e-05	1.62143e-10	RP11-705C15.2	186	186.309	1.00004	2.98635	6.65634e-06	0.615508	9.999e-05	1.95209e-05	RP11-705C15.2	ALU
ENSG00000270863_ALU-NREF_1910	ENSG00000270863	12	11665658	11667070	+	4	ALU-NREF_1910	12	11179038	11179038	442	444.169	0.999987	3.82924	8.35221e-09	0.378836	9.999e-05	2.94167e-08	RP11-434C1.3	186	187.762	0.999985	3.8547	5.27079e-09	0.516578	9.999e-05	1.72082e-08	RP11-434C1.3	ALU
ENSG00000116791_L1-NREF_3	ENSG00000116791	1	75171171	75232362	-	5	L1-NREF_3	1	75192907	75192907	442	445.593	1.00001	4.8424	7.28999e-17	-0.509386	9.999e-05	2.64775e-16	CRYZ	186	187.925	1.00004	4.9193	4.29995e-50	-1.1369	9.999e-05	6.64094e-50	CRYZ	L1
ENSG00000231259_L1-NREF_23	ENSG00000231259	2	87257801	87303536	-	1	L1-NREF_23	2	87407707	87407707	442	434.781	1	0.99978	0.000292976	-0.246039	9.999e-05	0.000328441	AC125232.1	186	189.215	1.00001	1.00866	4.17878e-05	-0.439351	9.999e-05	3.6156e-05	AC125232.1	L1
ENSG00000171928_SVA-REF_16	ENSG00000171928	17	18684309	18710027	+	1	SVA-REF_16	17	18791139	18791139	442	440.586	1.00001	0.999613	1.57534e-12	0.331174	9.999e-05	1.70805e-12	TVP23B	186	186.781	0.999976	1.01852	3.96234e-06	0.376555	9.999e-05	3.85256e-06	TVP23B	SVA
ENSG00000216901_ALU-REF_349	ENSG00000216901	6	28143967	28144452	+	45744	ALU-REF_349	6	28190196	28190196	442	440.273	0.999993	1.97982	5.21882e-14	-0.398078	9.999e-05	1.15669e-13	AL022393.7	292	297.104	1.00001	1.94394	2.35793e-20	-0.722345	9.999e-05	2.14969e-20	AL022393.7	ALU
ENSG00000227986_ALU-NREF_1243	ENSG00000227986	7	63815457	63816577	+	63603	ALU-NREF_1243	7	63880180	63880180	442	441.406	0.999997	1.00575	5.61064e-07	0.350533	9.999e-05	5.74249e-07	TRIM60P18	292	289.576	1	1.01533	3.56572e-06	0.370003	9.999e-05	3.9739e-06	TRIM60P18	ALU
ENSG00000228653_ALU-NREF_1243	ENSG00000228653	7	63961204	63962107	+	-81024	ALU-NREF_1243	7	63880180	63880180	442	436.82	1	0.993309	1.45778e-05	0.327405	9.999e-05	1.62545e-05	HNRNPCP7	292	294.638	0.999992	1.00057	5.60403e-06	0.395245	9.999e-05	5.08716e-06	HNRNPCP7	ALU
ENSG00000228716_ALU-REF_279	ENSG00000228716	5	79922048	80172279	-	0	ALU-REF_279	5	80039372	80039372	442	447.719	0.999991	3.00137	6.15703e-05	-0.216292	0.00019998	0.000165585	DHFR	292	291.059	1.00002	2.98664	2.26743e-15	-0.552174	9.999e-05	7.50207e-15	DHFR	ALU
ENSG00000229186_ALU-NREF_2042	ENSG00000229186	12	112337068	112340042	+	437089	ALU-NREF_2042	12	112777131	112777131	442	438.288	0.999994	1.00305	0.000325659	-0.249154	0.00079992	0.000346185	ADAM1A	292	288.92	0.999996	0.97725	7.90161e-11	-0.807837	9.999e-05	9.70438e-11	ADAM1A	ALU
ENSG00000231259_L1-NREF_23	ENSG00000231259	2	87257801	87303536	-	-104171	L1-NREF_23	2	87407707	87407707	442	434.781	1	0.99978	0.000292976	-0.246039	9.999e-05	0.000328441	AC125232.1	292	289.704	1.00001	0.992671	1.96962e-07	-0.419304	9.999e-05	2.1828e-07	AC125232.1	L1
ENSG00000231360_ALU-NREF_111	ENSG00000231360	1	144339739	144521058	+	429968	ALU-NREF_111	1	144951026	144951026	442	444.719	0.99999	3.02024	4.02122e-20	1.00174	9.999e-05	9.34115e-20	AL592284.1	292	300.013	0.999982	3.02143	1.3526e-21	1.10199	9.999e-05	1.15378e-21	AL592284.1	ALU
ENSG00000236624_ALU-REF_8	ENSG00000236624	1	45959539	45988719	-	-377389	ALU-REF_8	1	46366108	46366108	442	451.054	1	2.00591	5.31563e-12	0.399601	9.999e-05	6.48339e-12	CCDC163P	292	301.096	1.00001	1.92887	2.78038e-27	0.887192	9.999e-05	8.50013e-28	CCDC163P	ALU
ENSG00000256594_ALU-NREF_1906	ENSG00000256594	12	9787189	9811008	+	60154	ALU-NREF_1906	12	9871162	9871162	442	452.856	0.999988	3.06862	8.96039e-11	0.374747	9.999e-05	1.62143e-10	RP11-705C15.2	292	292.841	1	2.98297	1.23073e-06	0.526207	9.999e-05	3.5437e-06	RP11-705C15.2	ALU
ENSG00000270863_ALU-NREF_1910	ENSG00000270863	12	11665658	11667070	+	-486620	ALU-NREF_1910	12	11179038	11179038	442	444.169	0.999987	3.82924	8.35221e-09	0.378836	9.999e-05	2.94167e-08	RP11-434C1.3	292	294.723	1	3.86115	2.74241e-11	0.333867	9.999e-05	8.56921e-11	RP11-434C1.3	ALU
